# Supplementary material for: Mapping of internal monophosphate 5′ ends of Bacillus subtilis messenger RNAs and ribosomal RNAs in wild-type and ribonuclease-mutant strains
Source: PubMed Central journal article supplement — Nucleic Acids Res. 2016 Feb 15;44(7):3373–89. doi: 10.1093/nar/gkw073 (PMC4838370; doi:10.1093/nar/gkw073), 2016-02-15
Supplement: supp_gkw073_nar-01201-y-2015-File009.pdf [file supp_gkw073_nar-01201-y-2015-File009.pdf]

Fig. S1

**A. Isolate rRNA-depleted total RNA**

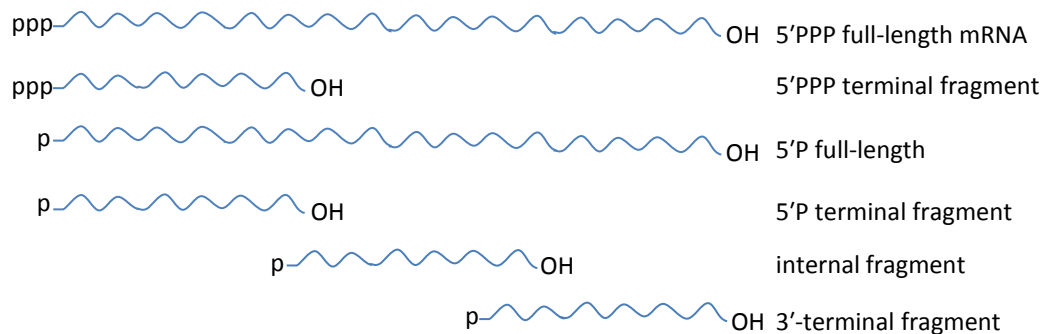

**B. Ligate 3' SR adaptor** rApp—3'—NH<sub>2</sub>

**C. RT primer hybridization** (remove excess 3' adaptor)

**D. Ligate 5' SR adaptor (RNA)** OH—5'—OH

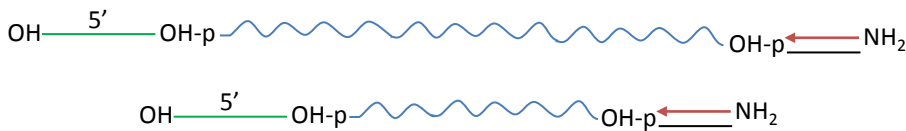

**E. Fragment with Mg<sup>2+</sup> to 100-200 nt**

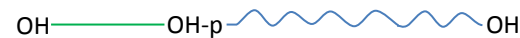

**F. Ligate 3' SR adaptor** rApp—3'—NH<sub>2</sub>

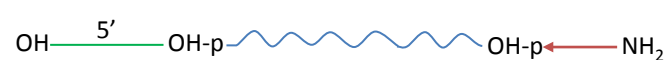

**G. RT primer hybridization**

**H. Reverse transcription**

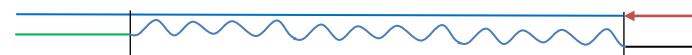

**I. PCR using extended primers with barcodes**

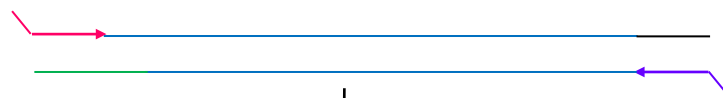

**J. Clean-up with AMPure Beads**

**K. Illumina sequence (50-nt single reads)**

**L. Align with *B. subtilis* genome sequence**

**LEGEND**

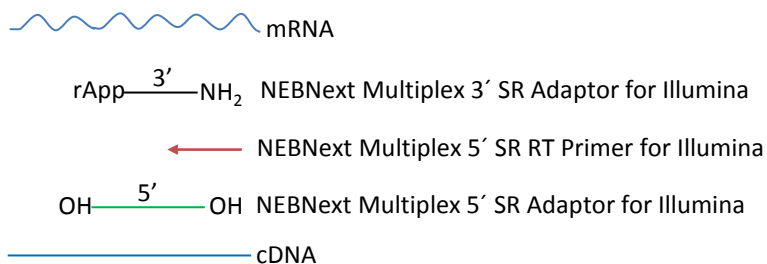

Fig. S2

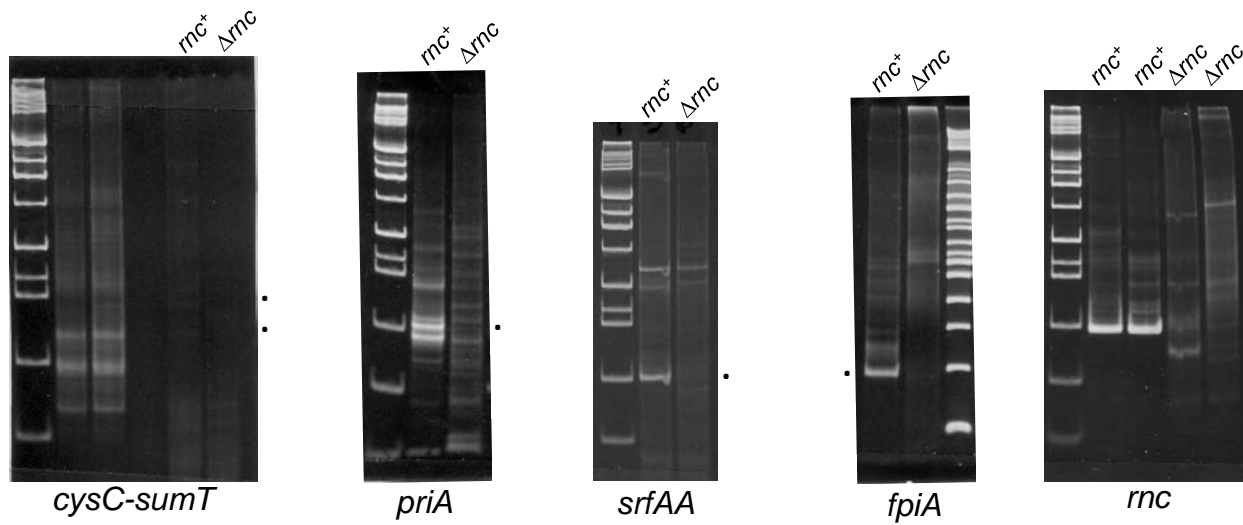

Fig. S2. 5' RLM-RACE products: Dot(s) at side of gel indicate band(s) that were cut out for cloning and sequencing.

Fig. S3

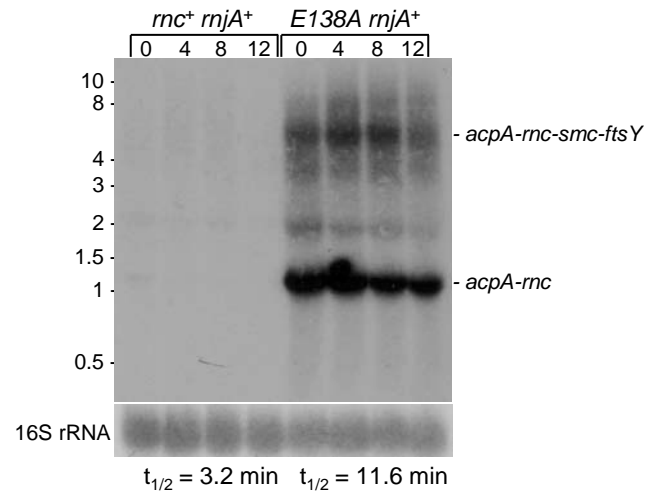

Fig. S3. Lighter exposure of Fig. 5C, showing full Northern blot results.

Table S1. Oligonucleotides used in this study.

| Oligo   | Gene                                           | Sequence                                                           |
|---------|------------------------------------------------|--------------------------------------------------------------------|
| CC172   | 16S rRNA downstream probe and primer extension | AAA ACT AAA CAA GAC AGG GAA CG                                     |
| CC1059  | 5'-RACE primer for 5S rRNA                     | TGG TGG CGA TAG CGA AGA G                                          |
| CC1060  | 5'-RACE primer downstream of 16S rRNA          | AGA CCC AAG GTC TTA TAT TCC G                                      |
| DHB1314 | <i>rnc</i> probe                               | GCA CGT ATT CCT GCA GCT GGC                                        |
| DHB1318 | <i>rncE138A</i> mutagenesis F*                 | GCT CTA TTG GCG GAT GTT TTT <u>GCA</u> GCA TTT ATC GGA GCC TTG TAC |
| DHB1319 | <i>rncE138A</i> mutagenesis R*                 | GTA CAA GGC TCC GAT AAA TGC <u>TGC</u> AAA AAC ATC CGC CAA TAG AGC |
| DHB1342 | <i>putP</i> probe                              | GAC GGA GCC TGC GTC AAT ATG CTG AC                                 |
| DHB1482 | NEBNext SR Primer (inner nested)               | GTT CAG AGT TCT ACA GTC CGA CGA TC                                 |
| DHB1486 | <i>srfAA</i> primer for 5'-RACE                | CAG AAT CTG CTG ATG AAG CGC TTC AGG                                |
| DHB1491 | <i>rnc</i> primer for 5'-RACE                  | GGT TCG CAA ACA ATT GCG GCT CTC                                    |
| DHB1505 | <i>priA</i> inner primer for 5'-RACE           | GGC CGG GCT TTT CAT GCC TGC C                                      |
| DHB1510 | NEBNext SR Primer (outer nested)               | CGA CCA CCG AGA TCT ACA CGT TCA GAG TTC TAC AGT CCG                |
| DHB1512 | <i>putP</i> primer for 5'-RACE                 | GGT AGT CGT TGA ACT GGT CTG TGA C                                  |
| DHB1517 | <i>priA</i> outer primer for 5'-RACE           | CGT GTG TTT TCG TCA GCT GGA TAC TG                                 |
| DHB1533 | <i>fpiA</i> outer primer for 5'-RACE           | CCA TGT ACT TCG CTG TAT CTA CAC CAA GG                             |
| DHB1534 | <i>fpiA</i> inner primer for 5'-RACE           | CCA AGG TAA ATC GTC GGC GC                                         |
| DHB1541 | <i>cysC-sumT</i> outer primer for 5'-RACE      | GGT CTC CGC CTT TCA GTC TGA C                                      |
| DHB1542 | <i>cysC-sumT</i> inner primer for 5'-RACE      | AAT CCG GAA GCT TCC CGC AG                                         |
| DHB1558 | <i>lacO</i> probe                              | AAG CTT AAT TGT TAT CCG CTC ACA ATT                                |
| DHB1714 | 16S rRNA probe                                 | CCA TGG TGT GAC GGG CGG TG                                         |
| DHB1716 | <i>srfAA</i> probe                             | CAA CCG AAG GCG CAT GGC GTC ATT TCT GC                             |

\* Nucleotides that were mutagenized are underlined.

Table S2. RNA reads in strains deleted for *rnjA*, and wild-type or deleted for *rnc*.

| Gene Name     | CDS start | CDS end | <i>rnc</i> <sup>+</sup> <i>rnjA</i> | <i>rnc</i> <i>rnjA</i> | <i>rnc</i> <i>rnjA</i> / <i>rnjA</i> |
|---------------|-----------|---------|-------------------------------------|------------------------|--------------------------------------|
| BSU00010,dnaA | 410       | 1750    | 19.23                               | 9.93                   | 0.52                                 |
| BSU00020,dnaN | 1939      | 3075    | 14.91                               | 8.14                   | 0.55                                 |
| BSU00030,yaaA | 3206      | 3421    | 32.61                               | 7.82                   | 0.24                                 |
| BSU00040,recF | 3437      | 4549    | 62.57                               | 17.03                  | 0.27                                 |
| BSU00050,yaaB | 4567      | 4812    | 56.64                               | 17.11                  | 0.30                                 |
| BSU00060,gyrB | 4867      | 6783    | 85.30                               | 21.57                  | 0.25                                 |
| BSU00070,gyrA | 6994      | 9459    | 62.29                               | 19.90                  | 0.32                                 |
| BSU00080,yaaC | 14847     | 15794   | 0.39                                | 0.26                   | 0.69                                 |
| BSU00090,guaB | 15915     | 17381   | 126.56                              | 409.31                 | 3.23                                 |
| BSU00100,dacA | 17534     | 18865   | 36.20                               | 14.87                  | 0.41                                 |
| BSU00110,yaaD | 19062     | 19946   | 18.19                               | 18.15                  | 1.00                                 |
| BSU00120,yaaE | 19968     | 20558   | 27.41                               | 23.91                  | 0.87                                 |
| BSU00130,serS | 20880     | 22157   | 9.58                                | 11.38                  | 1.19                                 |
| BSU00140,dck  | 22496     | 23149   | 7.91                                | 5.65                   | 0.71                                 |
| BSU00150,dgk  | 23146     | 23769   | 5.23                                | 4.17                   | 0.80                                 |
| BSU00160,yaaH | 23868     | 25151   | 0.27                                | 0.40                   | 1.49                                 |
| BSU00170,yaaI | 25221     | 25766   | 0.59                                | 1.52                   | 2.57                                 |
| BSU00180,tadA | 25852     | 26337   | 2.57                                | 10.04                  | 3.90                                 |
| BSU00190,dnaX | 26814     | 28505   | 5.09                                | 2.84                   | 0.56                                 |
| BSU00200,yaaK | 28529     | 28852   | 12.45                               | 8.93                   | 0.72                                 |
| BSU00210,recR | 28867     | 29463   | 6.19                                | 4.21                   | 0.68                                 |
| BSU00220,yaaL | 29481     | 29705   | 11.20                               | 7.31                   | 0.65                                 |
| BSU00230,bofA | 29772     | 30035   | 1.17                                | 1.64                   | 1.41                                 |
| BSU00240,csfB | 35531     | 35725   | 0.77                                | 0.74                   | 0.95                                 |
| BSU00250,xpaC | 35845     | 36459   | 3.08                                | 3.51                   | 1.14                                 |
| BSU00260,yaaN | 36478     | 37638   | 3.41                                | 3.33                   | 0.98                                 |
| BSU00270,yaaO | 37720     | 39162   | 9.06                                | 6.15                   | 0.68                                 |
| BSU00280,tmk  | 39159     | 39797   | 7.46                                | 4.89                   | 0.65                                 |
| BSU00290,yaaQ | 39871     | 40200   | 10.61                               | 12.37                  | 1.17                                 |
| BSU00300,yaaR | 40213     | 40653   | 9.07                                | 9.88                   | 1.09                                 |
| BSU00310,holB | 40665     | 41654   | 10.17                               | 10.70                  | 1.05                                 |
| BSU00320,yaaT | 41657     | 42484   | 30.51                               | 25.11                  | 0.82                                 |
| BSU00330,yabA | 42499     | 42858   | 43.22                               | 39.67                  | 0.92                                 |
| BSU00340,yabB | 42917     | 43660   | 2.99                                | 2.40                   | 0.80                                 |
| BSU00350,yazA | 43647     | 43946   | 3.05                                | 3.07                   | 1.01                                 |
| BSU00360,yabC | 43921     | 44799   | 2.97                                | 3.40                   | 1.15                                 |
| BSU00370,abrB | 44848     | 45138   | 24.25                               | 50.06                  | 2.06                                 |
| BSU00380,metS | 45633     | 47627   | 11.56                               | 11.20                  | 0.97                                 |
| BSU00390,yabD | 47706     | 48473   | 1.13                                | 4.04                   | 3.57                                 |
| BSU00400,yabE | 48629     | 49942   | 12.26                               | 23.04                  | 1.88                                 |
| BSU00410,rnmV | 50087     | 50647   | 6.80                                | 3.16                   | 0.46                                 |
| BSU00420,ksrA | 50640     | 51518   | 11.05                               | 4.78                   | 0.43                                 |
| BSU00430,yabG | 51680     | 52552   | 0.29                                | 0.32                   | 1.14                                 |

|                 |        |        |        |        |      |
|-----------------|--------|--------|--------|--------|------|
| BSU00440,veg    | 52763  | 53023  | 25.10  | 37.06  | 1.48 |
| BSU00450,sspF   | 53183  | 53368  | 1.19   | 6.43   | 5.40 |
| BSU00460,ipk    | 53516  | 54385  | 24.76  | 12.44  | 0.50 |
| BSU00470,purR   | 54441  | 55298  | 48.29  | 30.29  | 0.63 |
| BSU00480,yabJ   | 55295  | 55672  | 52.92  | 42.66  | 0.81 |
| BSU00490,spoVG  | 55866  | 56159  | 25.73  | 157.86 | 6.14 |
| BSU00500,glmU   | 56352  | 57722  | 49.71  | 19.96  | 0.40 |
| BSU00510,prs    | 57745  | 58698  | 73.59  | 34.97  | 0.48 |
| BSU00520,ctc    | 58783  | 59397  | 140.04 | 85.27  | 0.61 |
| BSU00530,pth    | 59504  | 60070  | 5.48   | 6.34   | 1.16 |
| BSU00540,yabK   | 60130  | 60360  | 7.40   | 7.96   | 1.08 |
| BSU00550,mfd    | 60430  | 63963  | 11.88  | 7.09   | 0.60 |
| BSU00560,spoVT  | 64099  | 64635  | 17.90  | 10.49  | 0.59 |
| BSU00570,yabM   | 64817  | 66415  | 3.08   | 1.61   | 0.52 |
| BSU00580,yabN   | 66405  | 67874  | 5.86   | 3.35   | 0.57 |
| BSU00590,yabO   | 67877  | 68137  | 6.98   | 5.30   | 0.76 |
| BSU00600,yabP   | 68216  | 68518  | 8.94   | 6.93   | 0.78 |
| BSU00610,yabQ   | 68515  | 69150  | 13.83  | 11.29  | 0.82 |
| BSU00620,divIC  | 69168  | 69545  | 29.68  | 31.83  | 1.07 |
| BSU00630,yabR   | 69626  | 70012  | 131.32 | 86.97  | 0.66 |
| BSU00640,spolIE | 70538  | 73021  | 3.16   | 1.21   | 0.38 |
| BSU00650,yabS   | 73106  | 73843  | 3.22   | 2.14   | 0.66 |
| BSU00660,yabT   | 73809  | 74825  | 1.57   | 0.84   | 0.53 |
| BSU00670,tiiS   | 74929  | 76347  | 17.77  | 19.24  | 1.08 |
| BSU00680,hprT   | 76344  | 76886  | 23.30  | 25.65  | 1.10 |
| BSU00690,ftsH   | 76984  | 78897  | 100.88 | 85.49  | 0.85 |
| BSU00700,coaX   | 79092  | 79868  | 5.23   | 3.34   | 0.64 |
| BSU00710,hslO   | 79880  | 80755  | 10.66  | 6.53   | 0.61 |
| BSU00720,yacD   | 80802  | 81695  | 1.15   | 2.15   | 1.87 |
| BSU00730,cysK   | 81771  | 82697  | 16.75  | 17.98  | 1.07 |
| BSU00740,pabB   | 82864  | 84276  | 2.70   | 3.64   | 1.35 |
| BSU00750,pabA   | 84290  | 84874  | 7.59   | 5.86   | 0.77 |
| BSU00760,pabC   | 84874  | 85755  | 6.54   | 4.43   | 0.68 |
| BSU00770,sul    | 85737  | 86594  | 12.14  | 10.72  | 0.88 |
| BSU00780,folB   | 86587  | 86949  | 11.04  | 8.90   | 0.81 |
| BSU00790,folK   | 86946  | 87449  | 16.66  | 11.40  | 0.68 |
| BSU00800,yazB   | 87401  | 87610  | 36.47  | 32.41  | 0.89 |
| BSU00810,dusB   | 87634  | 88635  | 51.17  | 60.82  | 1.19 |
| BSU00820,lysS   | 88727  | 90226  | 42.61  | 47.61  | 1.12 |
| BSU00830,ctsR   | 101449 | 101913 | 1.54   | 2.47   | 1.60 |
| BSU00840,mcsA   | 101927 | 102484 | 3.07   | 3.93   | 1.28 |
| BSU00850,mcsB   | 102484 | 103575 | 4.07   | 4.36   | 1.07 |
| BSU00860,clpC   | 103572 | 106004 | 12.36  | 12.31  | 1.00 |
| BSU00870,radA   | 106096 | 107472 | 4.51   | 3.40   | 0.75 |
| BSU00880,yacK   | 107476 | 108558 | 3.45   | 2.79   | 0.81 |
| BSU00890,yacL   | 108674 | 109774 | 7.55   | 6.17   | 0.82 |
| BSU00900,ispD   | 109789 | 110487 | 13.63  | 8.76   | 0.64 |

|               |        |        |        |        |      |
|---------------|--------|--------|--------|--------|------|
| BSU00910,ispF | 110480 | 110956 | 5.40   | 4.96   | 0.92 |
| BSU00920,gltx | 111047 | 112498 | 53.01  | 44.21  | 0.83 |
| BSU00930,cysE | 112800 | 113453 | 3.61   | 1.81   | 0.50 |
| BSU00940,cysS | 113450 | 114850 | 8.22   | 5.55   | 0.67 |
| BSU00950,mrnC | 114854 | 115285 | 4.51   | 3.88   | 0.86 |
| BSU00960,rlmB | 115269 | 116018 | 2.78   | 2.16   | 0.78 |
| BSU00970,yacP | 116025 | 116537 | 2.01   | 1.40   | 0.70 |
| BSU00980,sigH | 116600 | 117256 | 5.92   | 6.90   | 1.17 |
| BSU00990,rpmG | 117349 | 117498 | 28.60  | 31.12  | 1.09 |
| BSU01000,secE | 117532 | 117711 | 43.18  | 43.00  | 1.00 |
| BSU01010,nusG | 117890 | 118423 | 14.74  | 9.20   | 0.62 |
| BSU01020,rplK | 118591 | 119016 | 585.52 | 286.56 | 0.49 |
| BSU01030,rplA | 119111 | 119809 | 209.55 | 105.89 | 0.51 |
| BSU01040,rplJ | 120061 | 120561 | 396.22 | 166.30 | 0.42 |
| BSU01050,rplL | 120607 | 120978 | 568.49 | 285.06 | 0.50 |
| BSU01060,ybxB | 121068 | 121673 | 3.28   | 2.17   | 0.66 |
| BSU01070,rpoB | 121919 | 125500 | 77.49  | 52.02  | 0.67 |
| BSU01080,rpoC | 125562 | 129161 | 162.04 | 91.91  | 0.57 |
| BSU01090,ybxF | 129340 | 129588 | 123.78 | 37.38  | 0.30 |
| BSU01100,rpsL | 129702 | 130118 | 363.66 | 143.40 | 0.39 |
| BSU01110,rpsG | 130160 | 130630 | 441.60 | 234.18 | 0.53 |
| BSU01120,fusA | 130684 | 132762 | 370.53 | 204.68 | 0.55 |
| BSU01130,tufA | 132882 | 134072 | 518.18 | 325.38 | 0.63 |
| BSU01140,ybaC | 134171 | 135127 | 0.95   | 1.54   | 1.63 |
| BSU01150,rpsJ | 135364 | 135672 | 195.28 | 96.29  | 0.49 |
| BSU01160,rplC | 135712 | 136341 | 270.57 | 132.71 | 0.49 |
| BSU01170,rplD | 136369 | 136992 | 310.08 | 160.52 | 0.52 |
| BSU01180,rplW | 136992 | 137279 | 353.19 | 184.11 | 0.52 |
| BSU01190,rplB | 137311 | 138144 | 388.24 | 196.62 | 0.51 |
| BSU01200,rpsS | 138202 | 138480 | 201.44 | 93.96  | 0.47 |
| BSU01210,rplV | 138497 | 138838 | 205.34 | 96.41  | 0.47 |
| BSU01220,rpsC | 138842 | 139498 | 177.30 | 79.83  | 0.45 |
| BSU01230,rplP | 139500 | 139934 | 154.61 | 70.75  | 0.46 |
| BSU01240,rpmC | 139924 | 140124 | 200.60 | 89.40  | 0.45 |
| BSU01250,rpsQ | 140147 | 140410 | 199.15 | 90.63  | 0.46 |
| BSU01260,rplN | 140451 | 140819 | 197.09 | 88.14  | 0.45 |
| BSU01270,rplX | 140857 | 141168 | 180.61 | 87.70  | 0.49 |
| BSU01280,rplE | 141195 | 141734 | 166.63 | 81.95  | 0.49 |
| BSU01290,rpsN | 141757 | 141942 | 210.97 | 106.13 | 0.50 |
| BSU01300,rpsH | 141974 | 142372 | 164.75 | 80.82  | 0.49 |
| BSU01310,rplF | 142402 | 142941 | 172.92 | 81.05  | 0.47 |
| BSU01320,rplR | 142974 | 143336 | 194.23 | 95.66  | 0.49 |
| BSU01330,rpsE | 143361 | 143861 | 163.56 | 80.46  | 0.49 |
| BSU01340,rpmD | 143875 | 144054 | 199.64 | 103.31 | 0.52 |
| BSU01350,rplO | 144085 | 144525 | 219.70 | 120.22 | 0.55 |
| BSU01360,secY | 144527 | 145822 | 150.57 | 85.48  | 0.57 |
| BSU01370,adk  | 145877 | 146530 | 122.80 | 75.83  | 0.62 |

|               |        |        |        |        |      |
|---------------|--------|--------|--------|--------|------|
| BSU01380,mapA | 146527 | 147273 | 135.28 | 65.87  | 0.49 |
| BSU01389,ybzG | 147312 | 147536 | 194.08 | 93.06  | 0.48 |
| BSU01390,infA | 147585 | 147803 | 237.09 | 106.23 | 0.45 |
| BSU01400,rpmJ | 147837 | 147950 | 328.46 | 149.15 | 0.45 |
| BSU01410,rpsM | 147973 | 148338 | 212.60 | 103.40 | 0.49 |
| BSU01420,rpsK | 148359 | 148754 | 256.41 | 130.62 | 0.51 |
| BSU01430,rpoA | 148931 | 149875 | 247.83 | 127.97 | 0.52 |
| BSU01440,rplQ | 149953 | 150315 | 268.98 | 154.04 | 0.57 |
| BSU01450,cbiO | 150443 | 151288 | 7.34   | 32.39  | 4.41 |
| BSU01460,cbiO | 151303 | 152133 | 24.51  | 38.60  | 1.57 |
| BSU01470,ybaF | 152130 | 152927 | 26.62  | 36.90  | 1.39 |
| BSU01480,truA | 152937 | 153680 | 29.13  | 42.71  | 1.47 |
| BSU01490,rplM | 153842 | 154279 | 514.98 | 440.00 | 0.85 |
| BSU01500,rpsI | 154300 | 154692 | 601.15 | 476.38 | 0.79 |
| BSU01510,ybaJ | 155156 | 155923 | 2.45   | 4.45   | 1.82 |
| BSU01520,ybaK | 156109 | 156552 | 0.35   | 2.08   | 5.96 |
| BSU01530,cwlD | 156612 | 157325 | 0.43   | 2.01   | 4.72 |
| BSU01540,salA | 157421 | 158479 | 8.88   | 8.94   | 1.01 |
| BSU01550,gerD | 158515 | 159072 | 1.52   | 2.20   | 1.45 |
| BSU01560,kbaA | 159182 | 159778 | 0.96   | 1.54   | 1.60 |
| BSU01570,ybaN | 159779 | 160543 | 0.64   | 1.21   | 1.89 |
| BSU01580,ybaR | 177083 | 178519 | 32.44  | 15.20  | 0.47 |
| BSU01590,ybaS | 178665 | 179585 | 10.05  | 9.57   | 0.95 |
| BSU01600,ybbA | 179595 | 180347 | 1.11   | 1.43   | 1.29 |
| BSU01610,feuC | 180344 | 181354 | 1.52   | 1.43   | 0.94 |
| BSU01620,feuB | 181347 | 182351 | 1.70   | 1.42   | 0.83 |
| BSU01630,feuA | 182370 | 183323 | 1.91   | 1.90   | 0.99 |
| BSU01640,ybbB | 183414 | 185003 | 1.52   | 1.21   | 0.79 |
| BSU01650,ybbC | 185194 | 186438 | 0.30   | 0.64   | 2.16 |
| BSU01660,ybbD | 186452 | 188380 | 0.16   | 0.50   | 3.04 |
| BSU01670,ybbE | 188408 | 189733 | 0.16   | 0.64   | 4.06 |
| BSU01680,ybbF | 189790 | 191157 | 0.11   | 0.55   | 4.87 |
| BSU01690,ybbH | 191183 | 192034 | 0.16   | 0.63   | 4.02 |
| BSU01700,murQ | 192051 | 192965 | 0.27   | 0.94   | 3.55 |
| BSU01710,ybbJ | 193075 | 193557 | 0.22   | 0.58   | 2.68 |
| BSU01720,ybbK | 193570 | 194025 | 0.32   | 0.84   | 2.58 |
| BSU01730,sigW | 194849 | 195412 | 16.21  | 8.64   | 0.53 |
| BSU01740,rsiW | 195426 | 196052 | 29.60  | 19.17  | 0.65 |
| BSU01750,ybbP | 196213 | 197034 | 7.20   | 5.78   | 0.80 |
| BSU01760,ybbR | 197027 | 198478 | 8.90   | 6.68   | 0.75 |
| BSU01770,glmM | 198497 | 199843 | 12.19  | 14.37  | 1.18 |
| BSU01780,glmS | 200277 | 202079 | 279.31 | 150.85 | 0.54 |
| BSU01800,alkA | 202547 | 203458 | 1.22   | 1.48   | 1.21 |
| BSU01810,adaA | 203729 | 204364 | 0.24   | 0.39   | 1.66 |
| BSU01820,adaB | 204351 | 204890 | 0.90   | 1.00   | 1.12 |
| BSU01830,ndhF | 205409 | 206926 | 3.25   | 2.79   | 0.86 |
| BSU01845,ybcC | 206941 | 209556 | 3.47   | 2.81   | 0.81 |



|               |        |        |       |      |       |
|---------------|--------|--------|-------|------|-------|
| BSU01860,ybcF | 209633 | 210160 | 3.23  | 3.30 | 1.02  |
| BSU01870,ybcH | 210224 | 210514 | 3.40  | 3.35 | 0.99  |
| BSU01880,ybcI | 210572 | 210946 | 3.73  | 4.36 | 1.17  |
| BSU01889,ybzH | 211429 | 211731 | 7.92  | 8.45 | 1.07  |
| BSU01890,ybcL | 211859 | 213031 | 0.83  | 0.54 | 0.64  |
| BSU01900,ybcM | 213155 | 213469 | 0.12  | 0.12 | 1.03  |
| BSU01910,skfA | 213941 | 214108 | 1.09  | 0.81 | 0.74  |
| BSU01920,skfB | 214175 | 215407 | 0.16  | 0.15 | 0.96  |
| BSU01935,skfC | 215404 | 216894 | 0.23  | 0.37 | 1.58  |
| BSU01950,skfE | 216913 | 217632 | 0.39  | 0.84 | 2.16  |
| BSU01960,skfF | 217697 | 219040 | 0.24  | 0.40 | 1.68  |
| BSU01970,skfG | 219087 | 219602 | 0.24  | 0.34 | 1.39  |
| BSU01980,skfH | 219607 | 220032 | 0.34  | 0.59 | 1.73  |
| BSU01990,ybdG | 220279 | 221256 | 0.31  | 0.24 | 0.76  |
| BSU02000,ybdJ | 221258 | 221929 | 0.37  | 0.34 | 0.91  |
| BSU02010,ybdK | 221950 | 222912 | 0.55  | 0.51 | 0.92  |
| BSU02019,ybzI | 222971 | 223234 | 4.65  | 3.94 | 0.85  |
| BSU02030,ybdM | 223219 | 223989 | 0.91  | 1.02 | 1.12  |
| BSU02040,ybdN | 224075 | 224932 | 1.43  | 0.90 | 0.63  |
| BSU02050,ybdO | 225064 | 226248 | 0.41  | 0.34 | 0.84  |
| BSU02060,ybxG | 226566 | 227954 | 4.08  | 4.44 | 1.09  |
| BSU02070,csgA | 228066 | 228314 | 0.25  | 0.96 | 3.82  |
| BSU02080,ybxH | 228331 | 228522 | 0.29  | 1.03 | 3.54  |
| BSU02090,ybxI | 228549 | 229352 | 0.39  | 0.94 | 2.44  |
| BSU02100,cypC | 229525 | 230778 | 0.20  | 0.65 | 3.27  |
| BSU02110,ybyB | 230819 | 231079 | 0.24  | 3.96 | 16.63 |
| BSU02120,ybeC | 231348 | 232967 | 1.31  | 3.99 | 3.04  |
| BSU02130,glpQ | 233014 | 233895 | 5.46  | 7.63 | 1.40  |
| BSU02140,glpT | 233994 | 235328 | 2.81  | 3.62 | 1.29  |
| BSU02150,ybeF | 235625 | 235873 | 0.84  | 0.57 | 0.68  |
| BSU02160,ybfA | 235965 | 236882 | 0.91  | 0.69 | 0.76  |
| BSU02170,ybfB | 236879 | 238129 | 1.90  | 2.01 | 1.06  |
| BSU02180,ybfE | 238164 | 238448 | 1.30  | 2.02 | 1.56  |
| BSU02190,ybfF | 238644 | 239555 | 0.60  | 1.86 | 3.09  |
| BSU02200,ybfG | 239644 | 241842 | 1.48  | 1.51 | 1.02  |
| BSU02210,ybfH | 241917 | 242837 | 3.02  | 3.04 | 1.00  |
| BSU02220,ybfI | 242834 | 243661 | 0.87  | 0.77 | 0.88  |
| BSU02230,purT | 243892 | 245046 | 0.74  | 2.23 | 3.01  |
| BSU02240,mpr  | 245190 | 246131 | 0.34  | 1.37 | 4.07  |
| BSU02250,ybfJ | 246094 | 246492 | 0.49  | 2.04 | 4.17  |
| BSU02260,ybfK | 246658 | 247548 | 2.98  | 2.54 | 0.85  |
| BSU02270,pssA | 247744 | 248277 | 12.42 | 5.93 | 0.48  |
| BSU02280,ybfM | 248268 | 248756 | 15.02 | 6.79 | 0.45  |
| BSU02290,psd  | 248749 | 249540 | 18.68 | 8.53 | 0.46  |
| BSU02300,ybfN | 249595 | 249873 | 1.44  | 0.99 | 0.69  |
| BSU02310,ybfO | 249979 | 251319 | 0.65  | 0.35 | 0.53  |
| BSU02320,ybfP | 251427 | 252314 | 0.45  | 0.37 | 0.82  |

|                |        |        |       |       |      |
|----------------|--------|--------|-------|-------|------|
| BSU02330,ybfQ  | 252514 | 253482 | 13.96 | 7.12  | 0.51 |
| BSU02340,glpP  | 253518 | 254762 | 0.46  | 1.15  | 2.49 |
| BSU02350,nagP  | 254907 | 256802 | 27.00 | 38.23 | 1.42 |
| BSU02360,nagBB | 256823 | 257572 | 10.35 | 15.63 | 1.51 |
| BSU02370,ybgA  | 257791 | 258498 | 4.49  | 5.27  | 1.17 |
| BSU02380,ybgB  | 258532 | 258807 | 8.74  | 9.26  | 1.06 |
| BSU02390,ybgE  | 259016 | 260086 | 0.29  | 0.25  | 0.87 |
| BSU02400,ybgF  | 260123 | 261535 | 0.40  | 3.16  | 7.86 |
| BSU02410,mmuM  | 261656 | 262603 | 0.25  | 1.08  | 4.37 |
| BSU02420,glpT  | 262732 | 264168 | 0.13  | 0.13  | 0.98 |
| BSU02430,ybgJ  | 264191 | 265174 | 0.10  | 0.09  | 0.86 |
| BSU02440,glpJ  | 265476 | 266708 | 1.22  | 1.15  | 0.95 |
| BSU02450,glpL  | 266719 | 267663 | 1.17  | 0.93  | 0.80 |
| BSU02460,ycbC  | 267890 | 268816 | 0.05  | 0.08  | 1.38 |
| BSU02470,ycbD  | 268846 | 270312 | 0.07  | 0.09  | 1.30 |
| BSU02480,gudP  | 270396 | 271763 | 0.10  | 0.10  | 0.97 |
| BSU02490,gudD  | 271800 | 273167 | 0.07  | 0.06  | 0.91 |
| BSU02500,ycbG  | 273237 | 273938 | 2.00  | 1.83  | 0.92 |
| BSU02510,garD  | 274029 | 275561 | 1.29  | 0.94  | 0.73 |
| BSU02520,ycbJ  | 275838 | 276758 | 19.56 | 7.52  | 0.38 |
| BSU02530,rtpA  | 277160 | 277321 | 2.20  | 2.56  | 1.17 |
| BSU02540,ycbK  | 277342 | 278280 | 1.55  | 1.82  | 1.17 |
| BSU02550,ycbL  | 278377 | 279057 | 0.70  | 0.79  | 1.12 |
| BSU02560,ycbM  | 279059 | 279994 | 1.02  | 0.79  | 0.77 |
| BSU02570,ycbN  | 280086 | 281009 | 2.53  | 2.61  | 1.03 |
| BSU02580,ycbO  | 281028 | 281714 | 3.17  | 2.78  | 0.88 |
| BSU02590,ycbP  | 281769 | 282155 | 0.71  | 4.86  | 6.85 |
| BSU02600,cwlJ  | 282469 | 282897 | 0.45  | 0.44  | 0.97 |
| BSU02610,ycbR  | 283003 | 283734 | 1.82  | 1.48  | 0.82 |
| BSU02619,yczK  | 283816 | 283992 | 0.19  | 0.31  | 1.61 |
| BSU02620,phoD  | 284011 | 285762 | 0.29  | 0.49  | 1.68 |
| BSU02630,tatAD | 285775 | 285987 | 0.57  | 1.14  | 2.01 |
| BSU02640,tatCD | 286048 | 286776 | 1.81  | 1.42  | 0.78 |
| BSU02650,pcp   | 286773 | 287420 | 1.72  | 1.51  | 0.88 |
| BSU02660,ycbU  | 287499 | 288611 | 3.47  | 2.19  | 0.63 |
| BSU02670,lmrB  | 288653 | 290092 | 22.67 | 11.80 | 0.52 |
| BSU02680,lmrA  | 290132 | 290698 | 41.07 | 25.16 | 0.61 |
| BSU02690,ansZ  | 290915 | 292042 | 0.76  | 0.49  | 0.64 |
| BSU02700,estA  | 292205 | 292843 | 1.24  | 0.60  | 0.48 |
| BSU02710,yczC  | 292881 | 293264 | 3.59  | 1.20  | 0.33 |
| BSU02720,yccF  | 293499 | 294575 | 9.58  | 6.04  | 0.63 |
| BSU02730,natK  | 294615 | 295571 | 4.35  | 3.33  | 0.77 |
| BSU02740,natR  | 295584 | 296285 | 1.60  | 1.85  | 1.15 |
| BSU02750,natA  | 296429 | 297169 | 0.73  | 0.93  | 1.27 |
| BSU02760,natB  | 297170 | 298330 | 1.29  | 1.40  | 1.09 |
| BSU02770,yccK  | 298466 | 299398 | 0.69  | 1.79  | 2.60 |
| BSU02780,ycdA  | 299438 | 300502 | 6.25  | 3.28  | 0.52 |

|                |        |        |       |       |       |
|----------------|--------|--------|-------|-------|-------|
| BSU02790,ycdB  | 300830 | 302248 | 0.33  | 0.76  | 2.27  |
| BSU02800,ycdC  | 302435 | 303796 | 0.83  | 0.65  | 0.79  |
| BSU02810,cwlK  | 303804 | 304307 | 1.07  | 0.95  | 0.89  |
| BSU02820,rapJ  | 304430 | 305551 | 10.85 | 11.20 | 1.03  |
| BSU02830,ycdF  | 305658 | 306434 | 0.19  | 0.75  | 3.95  |
| BSU02840,ycdG  | 306459 | 308144 | 0.36  | 0.99  | 2.80  |
| BSU02850,adcA  | 308332 | 309291 | 4.10  | 5.39  | 1.32  |
| BSU02860,adcC  | 309347 | 310042 | 2.40  | 2.55  | 1.06  |
| BSU02870,adcB  | 310000 | 310842 | 13.04 | 7.02  | 0.54  |
| BSU02880,yceB  | 310880 | 311875 | 1.36  | 1.85  | 1.37  |
| BSU02890,yceC  | 312159 | 312758 | 5.48  | 8.75  | 1.60  |
| BSU02900,yceD  | 312780 | 313361 | 27.83 | 43.11 | 1.55  |
| BSU02910,yceE  | 313396 | 313974 | 34.01 | 52.88 | 1.56  |
| BSU02920,yceF  | 314025 | 314798 | 30.83 | 47.94 | 1.56  |
| BSU02930,yceG  | 314883 | 316496 | 5.87  | 17.77 | 3.03  |
| BSU02940,yceH  | 316512 | 317603 | 6.24  | 17.78 | 2.85  |
| BSU02950,yceI  | 317725 | 318927 | 0.76  | 5.17  | 6.81  |
| BSU02960,yceJ  | 319180 | 320352 | 0.22  | 0.17  | 0.79  |
| BSU02970,yceK  | 320421 | 320723 | 15.42 | 17.44 | 1.13  |
| BSU02980,opuAA | 321013 | 322269 | 10.27 | 32.62 | 3.18  |
| BSU02990,opuAB | 322271 | 323119 | 24.04 | 46.14 | 1.92  |
| BSU03000,opuAC | 323119 | 324000 | 21.35 | 40.74 | 1.91  |
| BSU03010,amhX  | 324038 | 325189 | 0.33  | 0.83  | 2.51  |
| BSU03020,ycgA  | 325339 | 326772 | 0.46  | 0.83  | 1.81  |
| BSU03030,ycgB  | 326888 | 327469 | 1.50  | 1.18  | 0.79  |
| BSU03040,amyE  | 327618 | 329597 | 10.52 | 4.21  | 0.40  |
| BSU03050,ldh   | 329774 | 330739 | 0.71  | 3.79  | 5.30  |
| BSU03060,lctP  | 330771 | 332396 | 0.99  | 11.16 | 11.21 |
| BSU03070,mdr   | 332441 | 333979 | 17.87 | 12.09 | 0.68  |
| BSU03080,ycgE  | 334092 | 334556 | 3.83  | 2.52  | 0.66  |
| BSU03090,ycgF  | 334630 | 335259 | 3.98  | 2.63  | 0.66  |
| BSU03100,ycgG  | 335329 | 336090 | 2.99  | 1.86  | 0.62  |
| BSU03110,ycgH  | 336092 | 337432 | 0.28  | 0.39  | 1.41  |
| BSU03120,ycgI  | 337562 | 338158 | 0.11  | 0.11  | 1.02  |
| BSU03130,nadE  | 338288 | 339106 | 27.50 | 22.75 | 0.83  |
| BSU03140,tmrB  | 339156 | 339749 | 1.05  | 0.91  | 0.87  |
| BSU03150,aroK  | 340025 | 340585 | 2.68  | 3.52  | 1.31  |
| BSU03160,ycgJ  | 340613 | 341374 | 0.74  | 0.86  | 1.16  |
| BSU03170,ycgK  | 341492 | 342466 | 1.17  | 1.19  | 1.02  |
| BSU03180,cah   | 342538 | 343494 | 0.90  | 1.61  | 1.79  |
| BSU03190,ycgL  | 343578 | 344360 | 0.74  | 0.78  | 1.05  |
| BSU03200,ycgM  | 344551 | 345462 | 0.15  | 0.34  | 2.24  |
| BSU03210,ycgN  | 345479 | 347026 | 0.79  | 1.08  | 1.37  |
| BSU03220,ycgO  | 347150 | 348571 | 1.24  | 8.61  | 6.92  |
| BSU03230,ycgP  | 348724 | 349959 | 1.06  | 1.82  | 1.72  |
| BSU03240,ycgQ  | 349996 | 350853 | 4.79  | 2.98  | 0.62  |
| BSU03250,ycgR  | 350858 | 351742 | 2.51  | 1.36  | 0.54  |

|                |        |        |       |       |      |
|----------------|--------|--------|-------|-------|------|
| BSU03260,ycgS  | 351842 | 352696 | 1.00  | 1.65  | 1.65 |
| BSU03270,ycgT  | 352858 | 353868 | 0.74  | 0.65  | 0.88 |
| BSU03280,nasF  | 353900 | 355351 | 1.71  | 2.59  | 1.51 |
| BSU03290,nasE  | 355412 | 355732 | 1.39  | 1.30  | 0.93 |
| BSU03300,nasD  | 355764 | 358181 | 0.52  | 0.36  | 0.69 |
| BSU03310,nasC  | 358303 | 360435 | 0.18  | 0.11  | 0.63 |
| BSU03320,nasB  | 360442 | 362757 | 0.28  | 0.17  | 0.61 |
| BSU03330,nasA  | 362937 | 364142 | 3.00  | 0.98  | 0.33 |
| BSU03340,yciA  | 364259 | 365173 | 0.12  | 0.12  | 1.00 |
| BSU03350,yciB  | 365170 | 365754 | 0.08  | 0.08  | 1.05 |
| BSU03359,yczL  | 365850 | 366035 | 0.10  | 0.05  | 0.48 |
| BSU03360,yciC  | 366063 | 367256 | 0.17  | 0.11  | 0.65 |
| BSU03370,yckA  | 367305 | 367985 | 25.35 | 10.24 | 0.40 |
| BSU03380,yckB  | 367995 | 368858 | 19.77 | 7.67  | 0.39 |
| BSU03390,yckC  | 369236 | 369691 | 4.65  | 2.19  | 0.47 |
| BSU03400,yckD  | 369773 | 370105 | 0.38  | 0.51  | 1.35 |
| BSU03410,bglC  | 370259 | 371692 | 0.47  | 0.86  | 1.84 |
| BSU03420,nin   | 371729 | 372127 | 14.96 | 15.26 | 1.02 |
| BSU03430,nucA  | 372154 | 372597 | 2.57  | 2.96  | 1.15 |
| BSU03440,tlpC  | 372771 | 374492 | 0.76  | 1.03  | 1.36 |
| BSU03450,hxlB  | 374603 | 375160 | 0.98  | 1.75  | 1.79 |
| BSU03460,hxlA  | 375166 | 375798 | 0.71  | 1.59  | 2.24 |
| BSU03470,hxlR  | 376032 | 376394 | 0.16  | 0.22  | 1.34 |
| BSU03480,srfAA | 376968 | 387731 | 26.72 | 20.75 | 0.78 |
| BSU03490,srfAB | 387744 | 398495 | 29.76 | 22.39 | 0.75 |
| BSU03500,comS  | 390880 | 391020 | 34.09 | 32.93 | 0.97 |
| BSU03510,srfAC | 398532 | 402359 | 47.39 | 30.02 | 0.63 |
| BSU03520,srfAD | 402388 | 403116 | 50.90 | 33.54 | 0.66 |
| BSU03530,ycxA  | 403217 | 404443 | 1.36  | 2.81  | 2.07 |
| BSU03540,ycxB  | 404458 | 405015 | 2.24  | 1.73  | 0.77 |
| BSU03550,ycxC  | 405069 | 406007 | 0.91  | 0.76  | 0.83 |
| BSU03560,ycxD  | 406131 | 407465 | 1.23  | 1.12  | 0.92 |
| BSU03580,yczE  | 408240 | 408887 | 17.83 | 7.88  | 0.44 |
| BSU03590,tcyC  | 409208 | 409951 | 11.24 | 8.32  | 0.74 |
| BSU03600,tcyB  | 409965 | 410669 | 6.61  | 3.71  | 0.56 |
| BSU03610,tcyA  | 410656 | 411462 | 7.97  | 4.08  | 0.51 |
| BSU03620,yclA  | 411578 | 412450 | 0.32  | 0.43  | 1.37 |
| BSU03630,yclB  | 412540 | 413154 | 0.09  | 0.11  | 1.17 |
| BSU03640,ubiD  | 413157 | 414578 | 0.16  | 0.20  | 1.28 |
| BSU03651,bsdD  | 414595 | 414822 | 0.36  | 0.49  | 1.39 |
| BSU03652,yclD  | 414819 | 415283 | 0.36  | 0.46  | 1.27 |
| BSU03660,yclE  | 415350 | 416195 | 0.98  | 1.09  | 1.12 |
| BSU03670,ntpT  | 416235 | 417713 | 75.24 | 17.46 | 0.23 |
| BSU03680,yclG  | 417993 | 419747 | 0.30  | 0.15  | 0.49 |
| BSU03690,yczF  | 419763 | 419984 | 0.15  | 0.21  | 1.43 |
| BSU03700,gerKA | 420110 | 421744 | 0.34  | 0.32  | 0.95 |
| BSU03710,gerKC | 421734 | 422957 | 0.42  | 0.35  | 0.82 |

|                |        |        |       |       |      |
|----------------|--------|--------|-------|-------|------|
| BSU03720,gerKB | 422982 | 424103 | 0.58  | 0.47  | 0.82 |
| BSU03730,yclH  | 424208 | 424888 | 0.29  | 0.26  | 0.89 |
| BSU03740,yclI  | 424904 | 426364 | 0.20  | 0.16  | 0.80 |
| BSU03750,yclJ  | 426577 | 427260 | 4.53  | 5.53  | 1.22 |
| BSU03760,yclK  | 427247 | 428668 | 6.27  | 6.40  | 1.02 |
| BSU03770,rapC  | 428831 | 429979 | 5.76  | 9.80  | 1.70 |
| BSU03780,phrC  | 429963 | 430085 | 39.07 | 74.65 | 1.91 |
| BSU03789,yczN  | 430356 | 430469 | 0.99  | 3.90  | 3.94 |
| BSU03790,yclM  | 430623 | 431987 | 0.32  | 2.09  | 6.49 |
| BSU03800,yclN  | 432372 | 433322 | 12.12 | 9.44  | 0.78 |
| BSU03810,yclO  | 433315 | 434262 | 14.68 | 12.16 | 0.83 |
| BSU03820,yclP  | 434256 | 435014 | 13.12 | 13.97 | 1.06 |
| BSU03830,yclQ  | 435036 | 435989 | 18.56 | 25.41 | 1.37 |
| BSU03840,ycnB  | 436036 | 437454 | 6.70  | 3.73  | 0.56 |
| BSU03850,ycnC  | 437474 | 438352 | 1.80  | 1.30  | 0.72 |
| BSU03860,ycnD  | 438516 | 439265 | 1.71  | 1.76  | 1.03 |
| BSU03870,ycnE  | 439282 | 439569 | 1.44  | 1.70  | 1.18 |
| BSU03880,yczG  | 439709 | 440023 | 13.12 | 15.25 | 1.16 |
| BSU03890,gabR  | 440025 | 441464 | 0.31  | 0.55  | 1.80 |
| BSU03900,gabT  | 441571 | 442881 | 0.20  | 0.19  | 0.93 |
| BSU03910,gabD  | 442950 | 444338 | 6.26  | 5.05  | 0.81 |
| BSU03920,glcU  | 444461 | 445324 | 0.42  | 0.62  | 1.49 |
| BSU03930,gdh   | 445344 | 446129 | 0.81  | 1.26  | 1.55 |
| BSU03940,ycnI  | 446174 | 446788 | 16.07 | 11.44 | 0.71 |
| BSU03950,ycnJ  | 446801 | 448426 | 7.56  | 5.48  | 0.72 |
| BSU03960,ycnK  | 448461 | 449033 | 4.77  | 4.60  | 0.97 |
| BSU03970,ycnL  | 449198 | 449551 | 3.40  | 2.72  | 0.80 |
| BSU03981,mtIA  | 449724 | 451160 | 1.82  | 4.02  | 2.21 |
| BSU03982,mtIF  | 451185 | 451616 | 6.58  | 14.52 | 2.21 |
| BSU03990,mtID  | 451618 | 452739 | 8.05  | 14.34 | 1.78 |
| BSU04000,ycsA  | 452830 | 453894 | 4.61  | 2.54  | 0.55 |
| BSU04010,sipU  | 454029 | 454592 | 2.97  | 2.24  | 0.75 |
| BSU04020,yczH  | 454652 | 455260 | 11.52 | 5.50  | 0.48 |
| BSU04030,ycsD  | 455346 | 455738 | 28.38 | 19.05 | 0.67 |
| BSU04039,yczO  | 455771 | 455935 | 1.54  | 0.74  | 0.48 |
| BSU04040,ycsE  | 456068 | 456817 | 10.06 | 9.84  | 0.98 |
| BSU04050,ycsF  | 457023 | 457796 | 0.26  | 1.32  | 5.03 |
| BSU04060,ycsG  | 457811 | 459025 | 0.33  | 1.20  | 3.59 |
| BSU04070,ycsI  | 459049 | 459822 | 0.41  | 1.20  | 2.95 |
| BSU04080,kipI  | 459867 | 460589 | 0.41  | 1.08  | 2.65 |
| BSU04090,kipA  | 460592 | 461599 | 0.35  | 0.75  | 2.17 |
| BSU04100,kipR  | 461615 | 462367 | 0.33  | 0.65  | 1.97 |
| BSU04110,lipC  | 462431 | 463072 | 0.74  | 0.88  | 1.20 |
| BSU04120,yczI  | 463245 | 463490 | 7.76  | 16.61 | 2.14 |
| BSU04130,yczJ  | 463496 | 463783 | 4.87  | 12.81 | 2.63 |
| BSU04140,pbpC  | 463934 | 465940 | 7.50  | 3.41  | 0.45 |
| BSU04150,ycsN  | 466042 | 466944 | 18.70 | 10.20 | 0.55 |

|               |        |        |        |        |       |
|---------------|--------|--------|--------|--------|-------|
| BSU04160,mtlR | 467130 | 469214 | 4.99   | 4.30   | 0.86  |
| BSU04170,ydaB | 469426 | 470937 | 2.41   | 1.33   | 0.55  |
| BSU04180,ydaC | 470957 | 471502 | 0.24   | 0.29   | 1.22  |
| BSU04190,ydaD | 471709 | 472569 | 0.16   | 1.18   | 7.26  |
| BSU04200,ydaE | 472585 | 473088 | 0.22   | 1.36   | 6.27  |
| BSU04210,ydaF | 473174 | 473725 | 2.00   | 9.58   | 4.79  |
| BSU04220,ydaG | 473803 | 474225 | 2.71   | 17.61  | 6.49  |
| BSU04230,ydaH | 474731 | 475540 | 14.30  | 5.93   | 0.41  |
| BSU04240,ydzA | 475584 | 475874 | 4.18   | 2.44   | 0.58  |
| BSU04250,lrpC | 476059 | 476493 | 2.98   | 3.55   | 1.19  |
| BSU04260,topB | 476558 | 478741 | 18.87  | 13.22  | 0.70  |
| BSU04270,ydaJ | 478944 | 480032 | 0.48   | 1.03   | 2.13  |
| BSU04280,ydaK | 480013 | 480864 | 0.32   | 0.61   | 1.90  |
| BSU04290,ydaL | 480875 | 482584 | 0.47   | 0.78   | 1.66  |
| BSU04300,ydaM | 482577 | 483839 | 0.47   | 0.78   | 1.67  |
| BSU04310,ydaN | 483845 | 485956 | 0.66   | 1.03   | 1.55  |
| BSU04320,ydaO | 486432 | 488255 | 5.55   | 1.25   | 0.23  |
| BSU04330,mutT | 488314 | 488763 | 0.31   | 0.20   | 0.63  |
| BSU04340,ydaP | 488830 | 490554 | 1.06   | 1.50   | 1.42  |
| BSU04359,ydzK | 490777 | 491043 | 30.43  | 51.84  | 1.70  |
| BSU04360,mntH | 491147 | 492424 | 265.44 | 105.22 | 0.40  |
| BSU04370,ydaS | 492654 | 492911 | 0.39   | 3.71   | 9.59  |
| BSU04380,ydaT | 492989 | 493441 | 0.10   | 0.36   | 3.47  |
| BSU04390,ydbA | 493559 | 494377 | 1.55   | 1.54   | 1.00  |
| BSU04400,gsiB | 494506 | 494877 | 0.25   | 6.30   | 25.51 |
| BSU04410,ydbB | 495009 | 495350 | 0.43   | 1.54   | 3.56  |
| BSU04420,ydbC | 495344 | 495703 | 0.32   | 1.26   | 3.88  |
| BSU04430,ydbD | 495740 | 496561 | 5.29   | 3.04   | 0.57  |
| BSU04440,dctB | 496646 | 497698 | 1.51   | 2.38   | 1.57  |
| BSU04450,dctS | 497768 | 499375 | 1.25   | 2.53   | 2.03  |
| BSU04460,dctR | 499365 | 500045 | 1.45   | 2.56   | 1.76  |
| BSU04470,dctP | 500166 | 501431 | 28.32  | 29.05  | 1.03  |
| BSU04480,ydbI | 501579 | 502631 | 21.55  | 16.57  | 0.77  |
| BSU04490,ydbJ | 502908 | 503834 | 4.78   | 3.65   | 0.76  |
| BSU04500,ydbK | 503854 | 504594 | 9.73   | 6.88   | 0.71  |
| BSU04510,ydbL | 504689 | 505024 | 14.25  | 11.87  | 0.83  |
| BSU04520,ydbM | 505152 | 506297 | 4.88   | 6.92   | 1.42  |
| BSU04530,ydbN | 506322 | 506501 | 3.93   | 4.08   | 1.04  |
| BSU04540,ydbO | 506866 | 507738 | 2.77   | 2.07   | 0.75  |
| BSU04550,ydbP | 507753 | 508073 | 9.78   | 11.10  | 1.13  |
| BSU04560,ddl  | 508248 | 509312 | 26.63  | 12.67  | 0.48  |
| BSU04570,murF | 509384 | 510757 | 8.09   | 8.87   | 1.10  |
| BSU04580,csH  | 511106 | 512641 | 166.26 | 102.33 | 0.62  |
| BSU04590,ydbS | 512814 | 513293 | 4.41   | 4.01   | 0.91  |
| BSU04600,ydbT | 513283 | 514764 | 13.18  | 9.88   | 0.75  |
| BSU04610,ydcA | 515016 | 515615 | 5.23   | 4.48   | 0.86  |
| BSU04620,acpS | 515710 | 516075 | 4.23   | 3.79   | 0.90  |

|                |        |        |       |       |      |
|----------------|--------|--------|-------|-------|------|
| BSU04630,ydcC  | 516241 | 517257 | 3.56  | 3.06  | 0.86 |
| BSU04640,alrA  | 517372 | 518541 | 4.76  | 3.75  | 0.79 |
| BSU04650,endB  | 518657 | 518938 | 45.98 | 43.72 | 0.95 |
| BSU04660,ndoA  | 518943 | 519293 | 38.68 | 39.74 | 1.03 |
| BSU04670,rsbRA | 519408 | 520232 | 3.87  | 6.60  | 1.71 |
| BSU04680,rsbS  | 520237 | 520602 | 4.30  | 6.24  | 1.45 |
| BSU04690,rsbT  | 520606 | 521007 | 3.71  | 5.39  | 1.45 |
| BSU04700,rsbU  | 521019 | 522026 | 3.77  | 6.40  | 1.70 |
| BSU04710,rsbV  | 522088 | 522417 | 5.61  | 11.49 | 2.05 |
| BSU04720,rsbW  | 522414 | 522896 | 4.67  | 9.73  | 2.09 |
| BSU04730,sigB  | 522862 | 523650 | 3.73  | 7.79  | 2.09 |
| BSU04740,rsbX  | 523650 | 524249 | 4.10  | 7.23  | 1.77 |
| BSU04750,ydcF  | 524492 | 524785 | 34.43 | 25.41 | 0.74 |
| BSU04760,ydcG  | 524782 | 525222 | 32.45 | 28.71 | 0.88 |
| BSU04770,ydcH  | 525206 | 525649 | 28.59 | 25.27 | 0.88 |
| BSU04780,ydcI  | 525743 | 527902 | 6.44  | 4.18  | 0.65 |
| BSU04790,ydcK  | 528129 | 528581 | 0.81  | 1.55  | 1.90 |
| BSU04800,ydcL  | 529505 | 530611 | 0.00  | 0.00  | 0.00 |
| BSU04810,immA  | 530624 | 531133 | 0.00  | 0.00  | 0.00 |
| BSU04820,immR  | 531130 | 531513 | 0.00  | 0.00  | 0.00 |
| BSU04830,sacV  | 531787 | 531981 | 0.00  | 0.00  | 0.00 |
| BSU04839,ydzL  | 531978 | 532238 | 0.00  | 0.00  | 0.00 |
| BSU04840,ydcO  | 532292 | 532552 | 0.00  | 0.00  | 0.00 |
| BSU04850,ydcP  | 532922 | 533302 | 0.00  | 0.00  | 0.00 |
| BSU04860,ydcQ  | 533338 | 534780 | 0.00  | 0.00  | 0.00 |
| BSU04870,ydcR  | 534773 | 535831 | 0.00  | 0.00  | 0.00 |
| BSU04880,ydcS  | 536096 | 536365 | 0.00  | 0.00  | 0.00 |
| BSU04890,ydcT  | 536404 | 536670 | 0.00  | 0.00  | 0.00 |
| BSU04900,yddA  | 536687 | 536995 | 0.00  | 0.00  | 0.00 |
| BSU04910,yddB  | 536985 | 538049 | 0.00  | 0.00  | 0.00 |
| BSU04920,yddC  | 538061 | 538309 | 0.00  | 0.00  | 0.00 |
| BSU04930,yddD  | 538322 | 538846 | 0.00  | 0.00  | 0.00 |
| BSU04940,yddE  | 538836 | 541229 | 0.00  | 0.00  | 0.00 |
| BSU04950,yddF  | 541248 | 541574 | 0.00  | 0.00  | 0.00 |
| BSU04960,yddG  | 541578 | 544025 | 0.00  | 0.00  | 0.00 |
| BSU04970,yddH  | 544022 | 545011 | 0.00  | 0.00  | 0.00 |
| BSU04980,yddI  | 545026 | 545532 | 0.00  | 0.00  | 0.00 |
| BSU04990,yddJ  | 545595 | 545975 | 0.00  | 0.00  | 0.00 |
| BSU05000,yddK  | 546166 | 546966 | 0.00  | 0.00  | 0.00 |
| BSU05010,rapI  | 547306 | 548481 | 0.00  | 0.00  | 0.00 |
| BSU05020,phrI  | 548438 | 548557 | 0.00  | 0.00  | 0.00 |
| BSU05030,yddM  | 548710 | 549651 | 0.00  | 0.00  | 0.00 |
| BSU05040,yddN  | 550240 | 551259 | 0.49  | 0.55  | 1.13 |
| BSU05050,lrpA  | 551519 | 551929 | 1.57  | 2.10  | 1.34 |
| BSU05060,lrpB  | 552052 | 552501 | 0.46  | 0.73  | 1.58 |
| BSU05070,yddQ  | 552616 | 553158 | 0.53  | 1.00  | 1.88 |
| BSU05080,yddR  | 553711 | 554475 | 0.22  | 0.28  | 1.26 |

|               |        |        |        |        |      |
|---------------|--------|--------|--------|--------|------|
| BSU05090,yddS | 554669 | 555979 | 0.13   | 0.20   | 1.54 |
| BSU05099,ydzM | 556562 | 556738 | 0.14   | 0.99   | 7.17 |
| BSU05100,yddT | 556763 | 557449 | 0.13   | 0.82   | 6.14 |
| BSU05109,ydzN | 557873 | 558058 | 0.87   | 1.69   | 1.95 |
| BSU05110,ydeA | 558408 | 559001 | 0.16   | 0.61   | 3.84 |
| BSU05120,cspC | 559264 | 559464 | 568.93 | 342.15 | 0.60 |
| BSU05130,ydeB | 560151 | 560612 | 0.82   | 1.78   | 2.17 |
| BSU05140,ydzE | 561180 | 561416 | 1.59   | 1.77   | 1.11 |
| BSU05150,ydeC | 561514 | 562389 | 0.75   | 1.28   | 1.70 |
| BSU05160,ydeD | 562502 | 563461 | 6.06   | 0.81   | 0.13 |
| BSU05170,ydeE | 563614 | 564486 | 1.07   | 1.20   | 1.13 |
| BSU05180,ydeF | 564704 | 566101 | 3.63   | 3.12   | 0.86 |
| BSU05190,ydeG | 566211 | 567503 | 0.59   | 0.80   | 1.34 |
| BSU05200,ydeH | 567662 | 568108 | 4.52   | 3.24   | 0.72 |
| BSU05210,ydeI | 568345 | 568938 | 1.78   | 2.67   | 1.50 |
| BSU05220,ydeJ | 569290 | 569949 | 3.01   | 2.62   | 0.87 |
| BSU05230,ydeK | 570371 | 571234 | 1.70   | 3.23   | 1.90 |
| BSU05240,ydeL | 571389 | 572780 | 0.33   | 0.46   | 1.37 |
| BSU05250,ydeM | 572974 | 573399 | 1.69   | 2.75   | 1.63 |
| BSU05260,ydeN | 573452 | 574024 | 3.22   | 4.73   | 1.47 |
| BSU05270,ydzF | 574106 | 574435 | 2.35   | 2.41   | 1.03 |
| BSU05280,ydeO | 574690 | 575562 | 1.65   | 2.57   | 1.56 |
| BSU05290,ydeP | 575712 | 576098 | 1.69   | 1.59   | 0.94 |
| BSU05300,ydeQ | 576209 | 576802 | 0.55   | 0.66   | 1.19 |
| BSU05310,ydeR | 576946 | 578133 | 0.67   | 0.46   | 0.68 |
| BSU05320,ydeS | 578337 | 578933 | 1.50   | 2.07   | 1.39 |
| BSU05329,ydzO | 579047 | 579232 | 1.50   | 1.98   | 1.32 |
| BSU05330,aseR | 579541 | 579876 | 1.37   | 0.81   | 0.59 |
| BSU05340,ydfA | 579889 | 581196 | 3.21   | 1.54   | 0.48 |
| BSU05350,ydfB | 581694 | 582479 | 0.64   | 0.71   | 1.11 |
| BSU05360,ydfC | 582536 | 583456 | 0.05   | 0.08   | 1.56 |
| BSU05370,ydfD | 583589 | 585037 | 0.40   | 0.37   | 0.93 |
| BSU05380,ydfE | 585155 | 585778 | 0.80   | 0.72   | 0.90 |
| BSU05390,ydfF | 585868 | 586548 | 7.71   | 5.35   | 0.69 |
| BSU05400,ydfG | 586628 | 587071 | 3.10   | 3.58   | 1.15 |
| BSU05408,ydzP | 587157 | 587336 | 0.24   | 0.37   | 1.51 |
| BSU05409,ydzQ | 587333 | 587476 | 0.16   | 0.23   | 1.48 |
| BSU05410,ydfH | 587744 | 588967 | 0.89   | 1.55   | 1.74 |
| BSU05420,ydfI | 588960 | 589601 | 0.79   | 1.58   | 2.00 |
| BSU05430,ydfJ | 589717 | 591891 | 0.17   | 0.15   | 0.86 |
| BSU05440,nap  | 592303 | 593205 | 5.30   | 2.63   | 0.50 |
| BSU05450,ydfK | 593407 | 594096 | 0.39   | 0.43   | 1.10 |
| BSU05460,ydfL | 594186 | 594998 | 0.48   | 0.95   | 1.99 |
| BSU05470,ydfM | 595109 | 596002 | 0.55   | 0.38   | 0.69 |
| BSU05480,ydfN | 596478 | 597098 | 0.14   | 0.61   | 4.51 |
| BSU05490,ydfO | 597114 | 598052 | 0.20   | 0.75   | 3.75 |
| BSU05500,ydfP | 598154 | 598543 | 1.05   | 1.65   | 1.57 |



|               |        |        |       |       |      |
|---------------|--------|--------|-------|-------|------|
| BSU05510,ydfQ | 598729 | 599067 | 0.18  | 0.21  | 1.17 |
| BSU05520,ydzH | 599107 | 599343 | 0.14  | 0.16  | 1.11 |
| BSU05529,ydzR | 599875 | 600105 | 0.14  | 0.21  | 1.45 |
| BSU05530,ydfR | 600229 | 600906 | 0.15  | 0.16  | 1.05 |
| BSU05540,ydfS | 601019 | 601726 | 0.22  | 0.21  | 0.93 |
| BSU05550,cotP | 601741 | 602172 | 0.17  | 0.20  | 1.15 |
| BSU05560,ydgA | 602185 | 602427 | 0.06  | 0.07  | 1.21 |
| BSU05570,ydgB | 602441 | 602713 | 0.12  | 0.14  | 1.13 |
| BSU05580,ydgC | 603012 | 603599 | 7.69  | 3.79  | 0.49 |
| BSU05590,ydgD | 603596 | 603940 | 8.65  | 4.21  | 0.49 |
| BSU05600,ydgE | 604103 | 604576 | 3.30  | 2.97  | 0.90 |
| BSU05610,vmlR | 604736 | 606379 | 1.96  | 1.60  | 0.82 |
| BSU05620,ydgF | 606699 | 608075 | 54.41 | 35.28 | 0.65 |
| BSU05630,dinB | 608246 | 608764 | 0.76  | 0.85  | 1.12 |
| BSU05640,ydgG | 608933 | 609391 | 0.61  | 0.60  | 0.99 |
| BSU05650,ydgH | 609388 | 612045 | 3.65  | 2.63  | 0.72 |
| BSU05660,ydgl | 612191 | 612820 | 3.23  | 1.91  | 0.59 |
| BSU05670,ydgJ | 612836 | 613330 | 0.96  | 0.62  | 0.65 |
| BSU05680,ydgK | 613641 | 614849 | 4.90  | 3.64  | 0.74 |
| BSU05690,ydhB | 614885 | 615622 | 0.60  | 0.78  | 1.29 |
| BSU05700,ydhC | 615871 | 616545 | 3.62  | 2.69  | 0.74 |
| BSU05710,ydhD | 616672 | 617934 | 0.51  | 0.25  | 0.49 |
| BSU05720,ydhE | 618095 | 619282 | 1.30  | 0.86  | 0.67 |
| BSU05730,ydhF | 619321 | 620031 | 0.26  | 0.25  | 0.97 |
| BSU05740,phoB | 620097 | 621485 | 0.28  | 0.23  | 0.83 |
| BSU05750,ydhG | 621847 | 622218 | 2.98  | 2.63  | 0.88 |
| BSU05760,ydhH | 622293 | 622790 | 1.41  | 2.21  | 1.57 |
| BSU05770,ydhI | 622808 | 623290 | 0.75  | 1.27  | 1.68 |
| BSU05780,ydhJ | 623373 | 624350 | 0.50  | 0.91  | 1.82 |
| BSU05790,ydhK | 624492 | 625109 | 0.68  | 0.80  | 1.18 |
| BSU05800,pbuE | 625125 | 626291 | 34.16 | 7.93  | 0.23 |
| BSU05810,gmuB | 626622 | 626933 | 0.56  | 0.38  | 0.68 |
| BSU05820,gmuA | 626933 | 627265 | 1.14  | 0.68  | 0.60 |
| BSU05830,gmuC | 627284 | 628612 | 0.96  | 0.48  | 0.51 |
| BSU05840,gmuD | 628630 | 630027 | 0.87  | 0.48  | 0.55 |
| BSU05850,gmuR | 630170 | 630883 | 2.56  | 2.41  | 0.94 |
| BSU05860,gmuE | 630912 | 631811 | 1.27  | 0.89  | 0.70 |
| BSU05870,gmuF | 631808 | 632755 | 0.89  | 0.49  | 0.55 |
| BSU05880,gmuG | 632774 | 633862 | 1.07  | 0.65  | 0.61 |
| BSU05900,thiL | 640662 | 641639 | 11.88 | 6.88  | 0.58 |
| BSU05910,ydiB | 641654 | 642130 | 5.04  | 4.06  | 0.81 |
| BSU05920,ydiC | 642111 | 642800 | 10.46 | 6.60  | 0.63 |
| BSU05930,rimI | 642810 | 643265 | 14.81 | 7.60  | 0.51 |
| BSU05940,gcp  | 643258 | 644298 | 13.78 | 8.52  | 0.62 |
| BSU05950,ydiF | 644528 | 646456 | 6.82  | 5.11  | 0.75 |
| BSU05960,moaC | 646582 | 647094 | 6.49  | 5.85  | 0.90 |
| BSU05970,ydiH | 647091 | 647738 | 14.88 | 15.36 | 1.03 |

|                |        |        |        |        |      |
|----------------|--------|--------|--------|--------|------|
| BSU05980,tatAY | 647760 | 647933 | 82.93  | 140.28 | 1.69 |
| BSU05990,tatCY | 647940 | 648704 | 49.50  | 80.63  | 1.63 |
| BSU06000,ydiK  | 648742 | 648933 | 12.15  | 11.16  | 0.92 |
| BSU06010,ydiL  | 648930 | 649664 | 8.03   | 8.91   | 1.11 |
| BSU06020,groES | 649903 | 650187 | 35.56  | 47.86  | 1.35 |
| BSU06030,groEL | 650234 | 651868 | 143.55 | 133.86 | 0.93 |
| BSU06040,ydiM  | 653432 | 653812 | 0.44   | 0.60   | 1.35 |
| BSU06048,ydzU  | 654071 | 654343 | 0.31   | 0.53   | 1.67 |
| BSU06060,ydiO  | 655223 | 656506 | 4.95   | 5.39   | 1.09 |
| BSU06070,ydiP  | 656528 | 657697 | 8.86   | 8.67   | 0.98 |
| BSU06090,ydiR  | 659623 | 660564 | 2.18   | 4.87   | 2.24 |
| BSU06100,ydiS  | 660596 | 661627 | 3.30   | 6.04   | 1.83 |
| BSU06110,ydjA  | 661630 | 663027 | 4.74   | 7.34   | 1.55 |
| BSU06120,ydjB  | 663601 | 663936 | 0.75   | 0.95   | 1.26 |
| BSU06130,ydjC  | 664319 | 664669 | 0.98   | 1.20   | 1.23 |
| BSU06140,gutR  | 664775 | 667264 | 6.70   | 3.85   | 0.57 |
| BSU06150,gutB  | 667466 | 668527 | 0.80   | 0.44   | 0.55 |
| BSU06160,gutP  | 668601 | 669992 | 0.19   | 0.12   | 0.65 |
| BSU06170,ydjE  | 670087 | 671049 | 2.46   | 3.84   | 1.56 |
| BSU06180,pspA  | 671245 | 671928 | 0.38   | 0.57   | 1.53 |
| BSU06190,ydjG  | 671994 | 673019 | 0.59   | 0.60   | 1.01 |
| BSU06200,ydjH  | 673019 | 673783 | 0.39   | 0.39   | 0.99 |
| BSU06210,ydjI  | 673814 | 674785 | 1.22   | 0.84   | 0.69 |
| BSU06220,ydjJ  | 674832 | 675857 | 0.06   | 0.09   | 1.62 |
| BSU06230,iolT  | 676442 | 677863 | 0.31   | 0.20   | 0.64 |
| BSU06240,bdhA  | 677911 | 678951 | 45.22  | 40.08  | 0.89 |
| BSU06250,ydjM  | 679390 | 679761 | 15.67  | 11.12  | 0.71 |
| BSU06260,ydjN  | 679827 | 680873 | 4.56   | 2.84   | 0.62 |
| BSU06269,ydzJ  | 680907 | 681065 | 1.61   | 1.18   | 0.74 |
| BSU06270,ydjO  | 681255 | 681464 | 10.98  | 10.36  | 0.94 |
| BSU06280,ydjP  | 681547 | 682362 | 2.15   | 1.25   | 0.58 |
| BSU06290,yeaA  | 682375 | 683364 | 1.60   | 0.92   | 0.57 |
| BSU06300,cotA  | 683462 | 685003 | 0.20   | 0.21   | 1.05 |
| BSU06310,gabP  | 685155 | 686564 | 0.24   | 0.59   | 2.43 |
| BSU06319,ydzX  | 686602 | 686889 | 0.23   | 0.27   | 1.19 |
| BSU06320,yeaB  | 686962 | 687834 | 1.49   | 1.35   | 0.91 |
| BSU06330,yeaC  | 688184 | 689146 | 5.40   | 4.24   | 0.79 |
| BSU06340,yeaD  | 689146 | 690342 | 7.44   | 5.05   | 0.68 |
| BSU06350,yebA  | 690364 | 692577 | 8.56   | 5.46   | 0.64 |
| BSU06360,guaA  | 692740 | 694281 | 152.62 | 47.20  | 0.31 |
| BSU06370,pbuG  | 694662 | 695984 | 7.90   | 2.98   | 0.38 |
| BSU06380,yebC  | 696195 | 696998 | 16.95  | 7.93   | 0.47 |
| BSU06390,yebD  | 697157 | 697324 | 0.70   | 1.04   | 1.49 |
| BSU06400,yebE  | 697538 | 698092 | 0.68   | 0.45   | 0.67 |
| BSU06410,yebG  | 698092 | 698289 | 2.55   | 1.68   | 0.66 |
| BSU06420,purE  | 698612 | 699100 | 3.84   | 2.21   | 0.58 |
| BSU06430,purK  | 699093 | 700235 | 3.14   | 1.76   | 0.56 |

|               |        |        |       |       |      |
|---------------|--------|--------|-------|-------|------|
| BSU06440,purB | 700232 | 701527 | 4.13  | 2.90  | 0.70 |
| BSU06450,purC | 701601 | 702326 | 0.16  | 0.68  | 4.16 |
| BSU06460,purS | 702319 | 702573 | 0.20  | 1.16  | 5.78 |
| BSU06470,purQ | 702570 | 703253 | 0.14  | 1.09  | 7.86 |
| BSU06480,purL | 703237 | 705465 | 0.38  | 1.73  | 4.52 |
| BSU06490,purF | 705441 | 706871 | 0.55  | 2.48  | 4.50 |
| BSU06500,purM | 706973 | 708013 | 0.26  | 0.97  | 3.75 |
| BSU06510,purN | 708010 | 708597 | 0.31  | 1.18  | 3.85 |
| BSU06520,purH | 708594 | 710132 | 0.64  | 1.82  | 2.83 |
| BSU06530,purD | 710148 | 711416 | 0.82  | 2.42  | 2.94 |
| BSU06540,yezC | 711456 | 711875 | 2.32  | 2.37  | 1.02 |
| BSU06550,yecA | 712019 | 713293 | 0.13  | 0.20  | 1.56 |
| BSU06559,yezF | 713308 | 713535 | 0.55  | 1.26  | 2.31 |
| BSU06560,yerA | 713664 | 715406 | 12.75 | 5.30  | 0.42 |
| BSU06570,yerB | 715433 | 716428 | 25.39 | 15.30 | 0.60 |
| BSU06580,yerC | 716431 | 716745 | 30.33 | 19.58 | 0.65 |
| BSU06590,yerD | 716780 | 718357 | 0.37  | 1.22  | 3.31 |
| BSU06600,pcrB | 718622 | 719308 | 3.83  | 2.87  | 0.75 |
| BSU06610,pcrA | 719370 | 721589 | 9.03  | 6.87  | 0.76 |
| BSU06620,ligA | 721613 | 723619 | 14.83 | 11.41 | 0.77 |
| BSU06630,yerH | 723635 | 724825 | 21.06 | 16.55 | 0.79 |
| BSU06640,yerI | 724987 | 725997 | 32.34 | 35.25 | 1.09 |
| BSU06650,sapB | 726035 | 726733 | 1.50  | 5.32  | 3.56 |
| BSU06660,opuE | 726840 | 728318 | 2.52  | 16.12 | 6.40 |
| BSU06670,gatC | 728732 | 729022 | 13.72 | 17.67 | 1.29 |
| BSU06680,gatA | 729038 | 730495 | 47.79 | 28.29 | 0.59 |
| BSU06690,gatB | 730509 | 731939 | 79.78 | 53.83 | 0.67 |
| BSU06700,yerO | 731954 | 732823 | 5.22  | 4.71  | 0.90 |
| BSU06710,swrC | 732916 | 736113 | 26.35 | 15.55 | 0.59 |
| BSU06720,yerQ | 736436 | 737347 | 30.06 | 15.82 | 0.53 |
| BSU06730,yefA | 737603 | 738982 | 6.61  | 2.33  | 0.35 |
| BSU06740,yefB | 738995 | 739897 | 0.99  | 0.54  | 0.54 |
| BSU06750,yefC | 739878 | 740213 | 0.44  | 0.39  | 0.89 |
| BSU06760,yeeA | 740288 | 742927 | 0.60  | 0.95  | 1.57 |
| BSU06770,yeeB | 742939 | 744738 | 0.65  | 1.58  | 2.42 |
| BSU06780,yeeC | 744851 | 745999 | 1.52  | 3.11  | 2.04 |
| BSU06790,yeeD | 746261 | 746566 | 2.06  | 3.72  | 1.81 |
| BSU06800,yezA | 746633 | 746839 | 2.34  | 4.39  | 1.88 |
| BSU06811,yezG | 747079 | 747534 | 4.06  | 5.78  | 1.43 |
| BSU06812,yeeF | 747554 | 749563 | 2.29  | 1.96  | 0.86 |
| BSU06820,yeeG | 749775 | 750797 | 0.04  | 0.04  | 0.89 |
| BSU06830,rapH | 750959 | 752089 | 1.88  | 2.64  | 1.40 |
| BSU06839,phrH | 752079 | 752252 | 3.47  | 6.50  | 1.87 |
| BSU06840,yeel | 752412 | 753131 | 9.07  | 7.57  | 0.84 |
| BSU06850,yeeK | 753265 | 753702 | 0.19  | 1.64  | 8.82 |
| BSU06860,yezE | 753817 | 754401 | 2.11  | 1.53  | 0.73 |
| BSU06870,yesE | 754480 | 754923 | 0.26  | 0.24  | 0.92 |

|                |        |        |       |       |      |
|----------------|--------|--------|-------|-------|------|
| BSU06880,yesF  | 754920 | 755780 | 0.25  | 0.31  | 1.24 |
| BSU06890,cotJA | 755907 | 756155 | 0.06  | 0.08  | 1.48 |
| BSU06900,cotJB | 756139 | 756402 | 0.07  | 0.08  | 1.27 |
| BSU06910,cotJC | 756417 | 756986 | 0.05  | 0.05  | 1.10 |
| BSU06920,yesJ  | 757111 | 757653 | 2.13  | 1.84  | 0.86 |
| BSU06930,yesK  | 757676 | 757978 | 0.37  | 0.31  | 0.83 |
| BSU06940,yesL  | 758093 | 758722 | 0.56  | 0.34  | 0.61 |
| BSU06950,yesM  | 758719 | 760452 | 0.42  | 0.22  | 0.52 |
| BSU06960,yesN  | 760452 | 761558 | 0.66  | 0.37  | 0.56 |
| BSU06970,yesO  | 761662 | 762945 | 0.07  | 0.05  | 0.73 |
| BSU06980,yesP  | 762942 | 763871 | 0.08  | 0.06  | 0.71 |
| BSU06990,yesQ  | 763875 | 764765 | 0.06  | 0.05  | 0.81 |
| BSU07000,yesR  | 764781 | 765815 | 0.11  | 0.09  | 0.81 |
| BSU07010,yesS  | 765838 | 768123 | 0.08  | 0.07  | 0.84 |
| BSU07020,rhgT  | 768137 | 768835 | 0.08  | 0.06  | 0.86 |
| BSU07030,yesU  | 768828 | 769490 | 0.07  | 0.07  | 0.93 |
| BSU07040,yesV  | 769487 | 770113 | 0.10  | 0.07  | 0.70 |
| BSU07050,yesW  | 770234 | 772096 | 0.13  | 0.09  | 0.73 |
| BSU07060,yesX  | 772142 | 773980 | 0.06  | 0.05  | 0.91 |
| BSU07070,yesY  | 774138 | 774791 | 0.12  | 0.10  | 0.89 |
| BSU07080,yesZ  | 774799 | 776790 | 0.15  | 0.14  | 0.91 |
| BSU07090,yetA  | 776834 | 779407 | 0.11  | 0.10  | 0.84 |
| BSU07100,lplA  | 779529 | 781037 | 0.13  | 0.06  | 0.46 |
| BSU07110,lplB  | 781092 | 782048 | 0.09  | 0.07  | 0.74 |
| BSU07120,lplC  | 782062 | 782949 | 0.20  | 0.16  | 0.80 |
| BSU07130,lplD  | 782958 | 784298 | 0.42  | 0.36  | 0.85 |
| BSU07140,yetF  | 784381 | 785076 | 0.48  | 0.43  | 0.89 |
| BSU07150,yetG  | 785113 | 785490 | 4.88  | 4.37  | 0.89 |
| BSU07160,yetH  | 785543 | 785905 | 1.90  | 4.18  | 2.20 |
| BSU07190,yezD  | 787715 | 787882 | 0.33  | 0.50  | 1.52 |
| BSU07200,yetJ  | 787992 | 788636 | 18.31 | 11.59 | 0.63 |
| BSU07210,yetK  | 788636 | 789628 | 3.30  | 7.83  | 2.37 |
| BSU07220,yetL  | 789652 | 790155 | 2.20  | 3.02  | 1.37 |
| BSU07230,yetM  | 790318 | 791427 | 0.15  | 0.12  | 0.85 |
| BSU07240,yetN  | 791462 | 792532 | 2.74  | 1.21  | 0.44 |
| BSU07250,yetO  | 792682 | 795867 | 0.12  | 0.14  | 1.11 |
| BSU07260,ltaSA | 796314 | 798233 | 33.21 | 12.52 | 0.38 |
| BSU07270,yfnH  | 798469 | 799233 | 0.20  | 0.15  | 0.75 |
| BSU07280,yfnG  | 799303 | 800208 | 0.26  | 0.23  | 0.92 |
| BSU07290,yfnF  | 800232 | 801143 | 0.32  | 0.32  | 1.01 |
| BSU07300,yfnE  | 801172 | 802350 | 1.18  | 1.06  | 0.90 |
| BSU07310,yfnD  | 802351 | 803286 | 3.28  | 2.75  | 0.84 |
| BSU07320,yfnC  | 803317 | 804546 | 12.61 | 15.75 | 1.25 |
| BSU07330,yfnB  | 804657 | 805364 | 2.52  | 3.77  | 1.50 |
| BSU07340,yfnA  | 805456 | 806841 | 8.21  | 5.22  | 0.64 |
| BSU07350,yfmT  | 807091 | 808548 | 0.21  | 1.27  | 6.04 |
| BSU07360,yfmS  | 808562 | 809422 | 0.34  | 2.05  | 6.04 |

|               |        |        |       |       |      |
|---------------|--------|--------|-------|-------|------|
| BSU07370,yfmR | 809557 | 811446 | 44.77 | 40.94 | 0.91 |
| BSU07380,yfmQ | 811569 | 812015 | 5.16  | 5.08  | 0.99 |
| BSU07390,yfmP | 812140 | 812562 | 0.57  | 0.59  | 1.04 |
| BSU07400,yfmO | 812628 | 813818 | 1.73  | 1.64  | 0.94 |
| BSU07410,yfmN | 814109 | 814264 | 0.18  | 0.50  | 2.72 |
| BSU07420,yfmM | 814384 | 815940 | 19.21 | 9.65  | 0.50 |
| BSU07430,yfmL | 816113 | 817243 | 8.19  | 5.01  | 0.61 |
| BSU07440,yfmK | 817311 | 817757 | 6.76  | 6.96  | 1.03 |
| BSU07450,yfmJ | 817810 | 818829 | 12.78 | 11.83 | 0.93 |
| BSU07460,yfmI | 819311 | 820531 | 0.93  | 1.50  | 1.62 |
| BSU07480,yfmG | 820867 | 822330 | 0.19  | 0.53  | 2.74 |
| BSU07490,yfmF | 822903 | 823703 | 6.52  | 7.29  | 1.12 |
| BSU07500,yfmE | 823716 | 824717 | 3.44  | 3.98  | 1.16 |
| BSU07510,yfmD | 824714 | 825715 | 2.79  | 3.33  | 1.19 |
| BSU07520,yfmC | 825787 | 826734 | 12.81 | 8.18  | 0.64 |
| BSU07530,yfmB | 826843 | 827211 | 0.32  | 0.48  | 1.49 |
| BSU07540,yfmA | 827252 | 827419 | 0.27  | 0.35  | 1.31 |
| BSU07550,yfIT | 827455 | 827802 | 0.40  | 3.87  | 9.61 |
| BSU07560,peI  | 827993 | 829255 | 10.28 | 3.52  | 0.34 |
| BSU07570,yfIS | 829382 | 830818 | 0.85  | 1.34  | 1.57 |
| BSU07580,citS | 830945 | 832573 | 0.27  | 0.41  | 1.52 |
| BSU07590,citT | 832545 | 833225 | 0.28  | 0.36  | 1.29 |
| BSU07600,yfIP | 833228 | 834187 | 0.32  | 0.45  | 1.41 |
| BSU07610,citM | 834383 | 835684 | 1.51  | 0.68  | 0.45 |
| BSU07620,yfIN | 835740 | 836534 | 2.40  | 1.23  | 0.51 |
| BSU07630,nosA | 836653 | 837744 | 10.88 | 10.12 | 0.93 |
| BSU07640,yfIL | 837735 | 838010 | 17.35 | 15.64 | 0.90 |
| BSU07650,yfIK | 838077 | 838742 | 17.87 | 17.71 | 0.99 |
| BSU07660,yfIJ | 838783 | 838920 | 10.07 | 19.66 | 1.95 |
| BSU07670,yfII | 839077 | 839232 | 10.96 | 21.48 | 1.96 |
| BSU07680,yfIH | 839339 | 839653 | 12.04 | 11.37 | 0.94 |
| BSU07690,yfIG | 839735 | 840484 | 14.25 | 13.25 | 0.93 |
| BSU07700,nagP | 840656 | 842014 | 55.18 | 18.64 | 0.34 |
| BSU07710,yfIE | 842047 | 843996 | 14.79 | 8.42  | 0.57 |
| BSU07720,yfID | 844097 | 844234 | 0.50  | 1.14  | 2.30 |
| BSU07735,yfIB | 844253 | 844645 | 0.89  | 1.82  | 2.03 |
| BSU07750,yfIA | 844770 | 846185 | 0.39  | 1.20  | 3.11 |
| BSU07760,yfKT | 846182 | 847258 | 0.42  | 1.21  | 2.91 |
| BSU07770,yfKS | 847282 | 847482 | 0.26  | 0.52  | 1.97 |
| BSU07780,yfKR | 847498 | 848652 | 0.17  | 0.24  | 1.47 |
| BSU07790,yfKQ | 848633 | 850174 | 0.13  | 0.11  | 0.89 |
| BSU07800,treP | 850367 | 851779 | 92.68 | 30.98 | 0.33 |
| BSU07810,treA | 851850 | 853535 | 44.80 | 26.20 | 0.58 |
| BSU07820,treR | 853556 | 854272 | 59.84 | 39.22 | 0.66 |
| BSU07830,yfKO | 854412 | 855077 | 37.30 | 24.82 | 0.67 |
| BSU07840,yfKN | 855114 | 859502 | 0.84  | 1.23  | 1.46 |
| BSU07850,yfKM | 859745 | 860263 | 0.81  | 2.83  | 3.48 |

|               |        |        |       |       |      |
|---------------|--------|--------|-------|-------|------|
| BSU07860,yfkl | 860303 | 861493 | 6.66  | 12.68 | 1.90 |
| BSU07870,yfkK | 861586 | 861801 | 7.81  | 14.65 | 1.88 |
| BSU07880,yfkJ | 862004 | 862474 | 0.87  | 0.94  | 1.07 |
| BSU07890,yfkI | 862492 | 862812 | 1.62  | 2.53  | 1.56 |
| BSU07900,yfkH | 862836 | 863663 | 2.25  | 3.32  | 1.47 |
| BSU07910,yfkF | 863862 | 865037 | 8.57  | 4.00  | 0.47 |
| BSU07920,yfkE | 865205 | 866260 | 0.31  | 0.95  | 3.07 |
| BSU07930,yfkD | 866331 | 867125 | 0.87  | 2.39  | 2.74 |
| BSU07940,yfkC | 867164 | 868006 | 17.96 | 11.08 | 0.62 |
| BSU07955,yfkA | 868007 | 869128 | 5.97  | 2.73  | 0.46 |
| BSU07970,yfjT | 869273 | 869458 | 6.49  | 6.26  | 0.96 |
| BSU07980,pdaA | 869559 | 870350 | 1.22  | 1.58  | 1.29 |
| BSU07990,yfjR | 870388 | 871248 | 3.50  | 5.16  | 1.48 |
| BSU08000,yfjQ | 871347 | 872306 | 1.73  | 1.35  | 0.78 |
| BSU08010,yfjP | 872425 | 873288 | 2.55  | 4.67  | 1.83 |
| BSU08020,yfjO | 873402 | 874802 | 19.21 | 12.42 | 0.65 |
| BSU08029,yfzA | 875428 | 875694 | 1.53  | 1.57  | 1.03 |
| BSU08030,dusC | 876426 | 877403 | 4.11  | 1.14  | 0.28 |
| BSU08040,yfjM | 877599 | 878051 | 1.04  | 0.91  | 0.88 |
| BSU08050,yfjL | 878081 | 878770 | 0.71  | 0.63  | 0.89 |
| BSU08060,acoA | 879002 | 880003 | 0.04  | 0.03  | 0.71 |
| BSU08070,acoB | 880007 | 881035 | 0.11  | 0.09  | 0.85 |
| BSU08080,acoC | 881049 | 882245 | 0.22  | 0.16  | 0.72 |
| BSU08090,acoL | 882266 | 883642 | 0.37  | 0.35  | 0.93 |
| BSU08100,acoR | 883758 | 885575 | 14.82 | 7.50  | 0.51 |
| BSU08110,sspH | 885629 | 885808 | 15.05 | 9.06  | 0.60 |
| BSU08120,yfjF | 885844 | 886173 | 30.76 | 34.49 | 1.12 |
| BSU08130,yfjE | 886223 | 886681 | 18.96 | 14.40 | 0.76 |
| BSU08140,yfjD | 886775 | 887332 | 7.54  | 4.85  | 0.64 |
| BSU08150,yfjC | 887364 | 888131 | 1.35  | 1.70  | 1.26 |
| BSU08160,yfjB | 888143 | 889366 | 0.69  | 1.25  | 1.82 |
| BSU08170,yfjA | 889372 | 889686 | 0.94  | 1.32  | 1.40 |
| BSU08180,malA | 890022 | 891371 | 2.51  | 3.47  | 1.38 |
| BSU08190,malR | 891436 | 892200 | 0.51  | 0.65  | 1.27 |
| BSU08200,malP | 892215 | 893798 | 1.23  | 0.72  | 0.59 |
| BSU08210,malQ | 893904 | 895625 | 1.14  | 1.22  | 1.07 |
| BSU08220,yfiC | 895619 | 897433 | 2.00  | 2.49  | 1.25 |
| BSU08230,catD | 897588 | 897992 | 2.64  | 1.23  | 0.47 |
| BSU08240,catE | 898010 | 898867 | 4.72  | 2.10  | 0.45 |
| BSU08250,yfiF | 898961 | 899905 | 0.24  | 0.34  | 1.41 |
| BSU08260,yfiG | 900080 | 901528 | 0.48  | 0.32  | 0.67 |
| BSU08270,yfiH | 901555 | 902496 | 0.53  | 0.35  | 0.66 |
| BSU08280,yfiI | 902506 | 903687 | 0.62  | 0.52  | 0.84 |
| BSU08290,yfiJ | 903811 | 905013 | 9.56  | 5.01  | 0.52 |
| BSU08300,yfiK | 905010 | 905672 | 9.83  | 4.31  | 0.44 |
| BSU08310,yfiL | 905816 | 906751 | 0.10  | 0.08  | 0.76 |
| BSU08320,yfiM | 906764 | 907954 | 0.15  | 0.13  | 0.82 |

|                |        |        |       |       |      |
|----------------|--------|--------|-------|-------|------|
| BSU08330,yfiN  | 907968 | 909125 | 0.37  | 0.36  | 0.97 |
| BSU08340,padR  | 909198 | 909746 | 9.19  | 8.35  | 0.91 |
| BSU08350,estB  | 910019 | 910651 | 0.53  | 0.33  | 0.62 |
| BSU08360,yfiQ  | 910840 | 911928 | 0.68  | 0.75  | 1.12 |
| BSU08370,yfiR  | 911964 | 912581 | 2.40  | 3.04  | 1.27 |
| BSU08380,yfiS  | 912547 | 913800 | 0.52  | 0.42  | 0.81 |
| BSU08390,yfiT  | 913924 | 914460 | 1.57  | 2.82  | 1.80 |
| BSU08400,yfiU  | 914457 | 916013 | 0.40  | 0.69  | 1.74 |
| BSU08410,yfiV  | 916124 | 916606 | 1.95  | 1.49  | 0.76 |
| BSU08425,mprF  | 916778 | 919348 | 16.49 | 10.38 | 0.63 |
| BSU08440,yfiY  | 919366 | 920343 | 6.82  | 6.92  | 1.02 |
| BSU08450,yfiZ  | 920474 | 921475 | 13.98 | 10.16 | 0.73 |
| BSU08460,yfhA  | 921472 | 922503 | 14.76 | 10.76 | 0.73 |
| BSU08470,yfhB  | 922618 | 923499 | 0.50  | 1.72  | 3.41 |
| BSU08480,yfhC  | 923587 | 924171 | 30.45 | 26.41 | 0.87 |
| BSU08490,yfhD  | 924210 | 924401 | 1.30  | 1.93  | 1.49 |
| BSU08500,yfhE  | 924468 | 924578 | 0.87  | 1.25  | 1.44 |
| BSU08510,yfhF  | 924633 | 925544 | 0.84  | 1.04  | 1.25 |
| BSU08520,recX  | 925633 | 926427 | 4.63  | 4.98  | 1.08 |
| BSU08530,yfhH  | 926429 | 926743 | 8.43  | 9.15  | 1.08 |
| BSU08540,yfhI  | 926886 | 928079 | 9.31  | 5.72  | 0.62 |
| BSU08550,sspK  | 928112 | 928264 | 1.05  | 1.49  | 1.41 |
| BSU08560,yfhJ  | 928389 | 928658 | 1.68  | 2.46  | 1.46 |
| BSU08570,yfhK  | 928803 | 929321 | 0.42  | 1.09  | 2.59 |
| BSU08580,yfhL  | 929406 | 929738 | 1.21  | 1.37  | 1.14 |
| BSU08590,yfhM  | 929725 | 930585 | 1.04  | 1.28  | 1.24 |
| BSU08600,csbB  | 930818 | 931807 | 0.74  | 1.10  | 1.49 |
| BSU08610,yfhO  | 931879 | 934464 | 1.37  | 1.19  | 0.87 |
| BSU08620,yfhP  | 934457 | 935440 | 14.31 | 9.63  | 0.67 |
| BSU08630,yfhQ  | 935656 | 936765 | 3.42  | 2.01  | 0.59 |
| BSU08640,yfhS  | 936773 | 936997 | 3.51  | 3.21  | 0.92 |
| BSU08650,fabL  | 937079 | 937831 | 12.87 | 12.46 | 0.97 |
| BSU08660,sspE  | 937900 | 938154 | 17.88 | 22.56 | 1.26 |
| BSU08670,ygaB  | 938243 | 938587 | 0.10  | 0.29  | 2.88 |
| BSU08680,ygaC  | 938731 | 939261 | 4.35  | 6.83  | 1.57 |
| BSU08690,ygaD  | 939322 | 941091 | 3.83  | 4.00  | 1.04 |
| BSU08700,ygaE  | 941168 | 942229 | 4.86  | 2.39  | 0.49 |
| BSU08710,gsaB  | 942449 | 943738 | 7.10  | 5.26  | 0.74 |
| BSU08720,ygaF  | 943891 | 944364 | 5.89  | 9.45  | 1.60 |
| BSU08730,perR  | 944487 | 944924 | 65.80 | 66.11 | 1.00 |
| BSU08740,ygzB  | 944959 | 945312 | 2.59  | 3.34  | 1.29 |
| BSU08750,ygxA  | 945520 | 946404 | 4.56  | 4.20  | 0.92 |
| BSU08760,spo0M | 953373 | 954149 | 7.98  | 4.82  | 0.60 |
| BSU08770,ygzA  | 954291 | 954494 | 1.67  | 1.68  | 1.00 |
| BSU08779,ygzC  | 954579 | 954851 | 0.22  | 0.35  | 1.59 |
| BSU08780,ygaJ  | 954893 | 955585 | 1.05  | 1.94  | 1.85 |
| BSU08790,thiC  | 955895 | 957667 | 0.33  | 0.40  | 1.23 |

|               |         |         |         |         |      |
|---------------|---------|---------|---------|---------|------|
| BSU08800,ygaK | 957705  | 959060  | 0.14    | 0.20    | 1.43 |
| BSU08810,senS | 959290  | 959508  | 0.00    | 0.00    | 0.00 |
| BSU08820,katA | 959535  | 960986  | 3.90    | 4.01    | 1.03 |
| BSU08830,ssuB | 961394  | 962161  | 0.00    | 0.00    | 0.00 |
| BSU08840,ssuA | 962179  | 963177  | 0.02    | 0.05    | 1.91 |
| BSU08850,ssuC | 963174  | 964004  | 0.06    | 0.08    | 1.36 |
| BSU08860,ssuD | 964027  | 965157  | 0.08    | 0.11    | 1.32 |
| BSU08870,ygaN | 965261  | 965797  | 0.85    | 0.78    | 0.92 |
| BSU08880,rpsN | 965909  | 966178  | 0.31    | 0.32    | 1.04 |
| BSU08890,ygaO | 966196  | 966669  | 5.01    | 3.26    | 0.65 |
| BSU08899,ygzD | 966671  | 966871  | 5.17    | 3.26    | 0.63 |
| BSU08900,yhzB | 967229  | 967852  | 2.79    | 3.47    | 1.24 |
| BSU08910,yhbA | 967935  | 969095  | 4.71    | 4.72    | 1.00 |
| BSU08920,yhbB | 969162  | 970097  | 0.88    | 1.01    | 1.14 |
| BSU08930,cspR | 970135  | 970617  | 12.05   | 7.29    | 0.60 |
| BSU08940,yhbD | 970667  | 971383  | 0.77    | 0.85    | 1.11 |
| BSU08950,yhbE | 971374  | 972087  | 2.01    | 2.24    | 1.12 |
| BSU08960,yhbF | 972099  | 972806  | 2.70    | 3.07    | 1.14 |
| BSU08970,prkA | 973156  | 975051  | 0.19    | 0.16    | 0.86 |
| BSU08980,yhbH | 975231  | 976409  | 0.16    | 0.13    | 0.83 |
| BSU08990,yhbl | 976569  | 977033  | 0.43    | 0.38    | 0.89 |
| BSU09000,yhbJ | 977069  | 977734  | 0.61    | 0.60    | 0.97 |
| BSU09010,yhcA | 977775  | 979373  | 0.84    | 0.77    | 0.92 |
| BSU09020,yhcB | 979396  | 979926  | 1.73    | 1.55    | 0.90 |
| BSU09030,yhcC | 979939  | 980313  | 1.54    | 1.46    | 0.95 |
| BSU09040,yhcD | 980313  | 980468  | 0.42    | 0.74    | 1.76 |
| BSU09050,yhcE | 980473  | 981234  | 3.75    | 8.17    | 2.18 |
| BSU09060,yhcF | 981237  | 981602  | 4.57    | 11.56   | 2.53 |
| BSU09070,yhcG | 981604  | 982302  | 5.13    | 16.50   | 3.22 |
| BSU09080,yhcH | 982319  | 983236  | 7.42    | 22.74   | 3.07 |
| BSU09090,yhcl | 983229  | 984170  | 27.11   | 51.18   | 1.89 |
| BSU09100,cspB | 984262  | 984465  | 1005.07 | 1241.30 | 1.24 |
| BSU09110,yhcJ | 984901  | 985731  | 10.45   | 16.83   | 1.61 |
| BSU09120,yhcK | 985734  | 986813  | 3.19    | 1.68    | 0.53 |
| BSU09130,tcyP | 986986  | 988377  | 11.31   | 2.34    | 0.21 |
| BSU09140,yhcM | 988417  | 988872  | 0.41    | 1.02    | 2.49 |
| BSU09150,yhcN | 989022  | 989591  | 0.63    | 3.06    | 4.85 |
| BSU09165,yhcO | 989712  | 990680  | 0.14    | 0.23    | 1.70 |
| BSU09180,yhcQ | 990612  | 991265  | 0.64    | 1.27    | 1.99 |
| BSU09190,yhcR | 991348  | 995001  | 0.50    | 1.47    | 2.96 |
| BSU09200,yhcS | 994998  | 995594  | 0.91    | 2.28    | 2.50 |
| BSU09210,yhcT | 995624  | 996532  | 1.82    | 1.32    | 0.72 |
| BSU09220,yhcU | 996643  | 997038  | 0.83    | 1.08    | 1.29 |
| BSU09230,yhcV | 997175  | 997597  | 1.13    | 2.18    | 1.94 |
| BSU09240,yhcW | 997724  | 998386  | 4.97    | 7.12    | 1.43 |
| BSU09250,yhcX | 998402  | 999943  | 7.87    | 15.12   | 1.92 |
| BSU09260,yhxA | 1000364 | 1001716 | 18.77   | 9.27    | 0.49 |



|                |         |         |        |       |      |
|----------------|---------|---------|--------|-------|------|
| BSU09270,glpP  | 1001744 | 1002322 | 30.78  | 16.80 | 0.55 |
| BSU09280,glpF  | 1002501 | 1003325 | 8.59   | 3.79  | 0.44 |
| BSU09290,glpK  | 1003344 | 1004834 | 54.94  | 59.64 | 1.09 |
| BSU09300,glpD  | 1004975 | 1006642 | 6.53   | 13.53 | 2.07 |
| BSU09310,pgcA  | 1006774 | 1008519 | 24.12  | 24.63 | 1.02 |
| BSU09320,yhcY  | 1008668 | 1009807 | 6.20   | 7.87  | 1.27 |
| BSU09330,yhcZ  | 1009804 | 1010448 | 5.86   | 8.08  | 1.38 |
| BSU09340,yhdA  | 1010445 | 1010969 | 5.87   | 8.85  | 1.51 |
| BSU09350,yhdB  | 1010984 | 1011226 | 0.38   | 1.84  | 4.80 |
| BSU09360,yhdC  | 1011427 | 1011750 | 0.54   | 1.93  | 3.60 |
| BSU09370,lytF  | 1011792 | 1013258 | 1.03   | 2.83  | 2.76 |
| BSU09380,nsrR  | 1013411 | 1013851 | 2.81   | 5.62  | 2.00 |
| BSU09390,ygxB  | 1013958 | 1015616 | 0.71   | 2.13  | 2.99 |
| BSU09400,spoVR | 1015647 | 1017053 | 0.20   | 0.13  | 0.63 |
| BSU09410,phoA  | 1017083 | 1018468 | 0.62   | 1.09  | 1.77 |
| BSU09420,lytE  | 1018998 | 1020002 | 151.22 | 62.03 | 0.41 |
| BSU09430,citR  | 1020073 | 1020948 | 1.34   | 3.93  | 2.93 |
| BSU09440,citA  | 1021057 | 1022157 | 1.22   | 4.77  | 3.92 |
| BSU09450,yhdF  | 1022231 | 1023100 | 2.31   | 8.19  | 3.55 |
| BSU09460,ctrA  | 1023350 | 1024747 | 0.21   | 0.09  | 0.40 |
| BSU09470,yhdH  | 1024865 | 1026220 | 7.46   | 3.47  | 0.46 |
| BSU09480,yhdI  | 1026255 | 1027664 | 3.93   | 2.36  | 0.60 |
| BSU09490,yhdJ  | 1027774 | 1028202 | 0.81   | 2.67  | 3.30 |
| BSU09500,yhdK  | 1028233 | 1028523 | 24.20  | 11.92 | 0.49 |
| BSU09510,yhdL  | 1028511 | 1029587 | 17.01  | 8.33  | 0.49 |
| BSU09520,sigM  | 1029577 | 1030068 | 5.06   | 3.06  | 0.60 |
| BSU09530,yhdN  | 1030265 | 1031260 | 0.31   | 2.80  | 9.14 |
| BSU09540,plsC  | 1031395 | 1031994 | 20.47  | 15.27 | 0.75 |
| BSU09550,yhdP  | 1032063 | 1033397 | 22.80  | 28.65 | 1.26 |
| BSU09560,cueR  | 1033458 | 1033889 | 27.28  | 29.86 | 1.09 |
| BSU09570,yhdR  | 1034046 | 1035227 | 0.59   | 1.67  | 2.85 |
| BSU09590,yhdT  | 1035554 | 1036939 | 3.56   | 13.34 | 3.75 |
| BSU09600,crcBA | 1036953 | 1037309 | 3.60   | 4.63  | 1.29 |
| BSU09610,yhdV  | 1037306 | 1037701 | 3.43   | 4.09  | 1.19 |
| BSU09620,yhdW  | 1037688 | 1038419 | 3.48   | 4.25  | 1.22 |
| BSU09630,yhdX  | 1038653 | 1038760 | 5.11   | 40.40 | 7.91 |
| BSU09640,yhdY  | 1038909 | 1040024 | 8.79   | 3.09  | 0.35 |
| BSU09650,yhdZ  | 1040094 | 1040837 | 2.68   | 3.94  | 1.47 |
| BSU09660,yheN  | 1040861 | 1041709 | 7.44   | 9.36  | 1.26 |
| BSU09670,dat   | 1041994 | 1042842 | 1.96   | 5.67  | 2.90 |
| BSU09680,nhaC  | 1042885 | 1044246 | 6.64   | 2.58  | 0.39 |
| BSU09690,nhaX  | 1044373 | 1044873 | 0.32   | 0.92  | 2.88 |
| BSU09700,yheJ  | 1045037 | 1045198 | 19.37  | 24.40 | 1.26 |
| BSU09710,yheI  | 1045318 | 1047075 | 1.24   | 1.04  | 0.84 |
| BSU09720,yheH  | 1047072 | 1049093 | 2.64   | 3.05  | 1.16 |
| BSU09730,yheG  | 1049142 | 1049762 | 1.46   | 2.27  | 1.55 |
| BSU09740,yheF  | 1049801 | 1049926 | 0.21   | 0.34  | 1.64 |

|                |         |         |       |       |      |
|----------------|---------|---------|-------|-------|------|
| BSU09750,sspB  | 1050031 | 1050234 | 1.17  | 9.46  | 8.08 |
| BSU09760,yheE  | 1050443 | 1050661 | 1.10  | 1.67  | 1.52 |
| BSU09770,yheD  | 1050811 | 1052172 | 0.60  | 0.30  | 0.50 |
| BSU09780,yheC  | 1052162 | 1053253 | 0.25  | 0.15  | 0.61 |
| BSU09790,yheB  | 1053520 | 1054653 | 3.69  | 2.42  | 0.66 |
| BSU09800,yheA  | 1054746 | 1055099 | 14.51 | 9.94  | 0.68 |
| BSU09810,yhaZ  | 1055143 | 1056216 | 1.69  | 1.20  | 0.71 |
| BSU09830,yhaX  | 1056702 | 1057568 | 11.68 | 5.51  | 0.47 |
| BSU09840,hemZ  | 1057680 | 1059185 | 10.28 | 3.40  | 0.33 |
| BSU09850,yhaU  | 1059203 | 1060420 | 3.78  | 2.58  | 0.68 |
| BSU09860,khtT  | 1060427 | 1060924 | 1.54  | 1.28  | 0.83 |
| BSU09870,khtS  | 1060988 | 1061326 | 0.93  | 0.84  | 0.91 |
| BSU09880,yhaR  | 1061491 | 1062258 | 0.19  | 0.33  | 1.74 |
| BSU09889,yhzD  | 1062279 | 1062464 | 0.19  | 0.39  | 2.09 |
| BSU09890,natA  | 1062591 | 1063487 | 1.06  | 0.69  | 0.65 |
| BSU09900,natB  | 1063480 | 1064739 | 13.86 | 5.92  | 0.43 |
| BSU09910,yhaO  | 1064846 | 1066072 | 1.24  | 1.70  | 1.38 |
| BSU09920,yhaN  | 1066077 | 1068968 | 7.11  | 5.89  | 0.83 |
| BSU09930,yhaM  | 1069042 | 1069986 | 13.34 | 12.81 | 0.96 |
| BSU09940,yhaL  | 1070111 | 1070323 | 0.77  | 1.34  | 1.74 |
| BSU09950,prsA  | 1070364 | 1071242 | 16.57 | 18.17 | 1.10 |
| BSU09958,yhzE  | 1071402 | 1071488 | 0.35  | 0.39  | 1.12 |
| BSU09965,yhaJ  | 1072042 | 1072560 | 5.79  | 4.36  | 0.75 |
| BSU09980,yhaI  | 1072768 | 1073109 | 9.21  | 24.91 | 2.70 |
| BSU09990,hpr   | 1073106 | 1073717 | 5.00  | 19.30 | 3.86 |
| BSU10000,yhaH  | 1073895 | 1074251 | 8.14  | 8.66  | 1.06 |
| BSU10009,yhzF  | 1074381 | 1074572 | 2.16  | 2.45  | 1.13 |
| BSU10010,trpP  | 1074646 | 1075164 | 39.76 | 58.50 | 1.47 |
| BSU10020,serC  | 1075289 | 1076368 | 2.96  | 22.26 | 7.52 |
| BSU10030,hinT  | 1076515 | 1076952 | 9.60  | 15.73 | 1.64 |
| BSU10040,ecsA  | 1077440 | 1078183 | 8.82  | 8.59  | 0.97 |
| BSU10050,ecsB  | 1078176 | 1079402 | 40.41 | 32.56 | 0.81 |
| BSU10060,ecsC  | 1079422 | 1080132 | 47.79 | 39.29 | 0.82 |
| BSU10070,yhaA  | 1080150 | 1081340 | 0.67  | 2.81  | 4.18 |
| BSU10080,yhfA  | 1081413 | 1082804 | 0.29  | 0.33  | 1.15 |
| BSU10090,yhgB  | 1082870 | 1083184 | 0.39  | 0.62  | 1.60 |
| BSU10100,yhgC  | 1083229 | 1083729 | 5.37  | 5.77  | 1.07 |
| BSU10110,pbpF  | 1083851 | 1085995 | 1.27  | 0.94  | 0.74 |
| BSU10120,hemE  | 1086117 | 1087178 | 6.05  | 4.04  | 0.67 |
| BSU10130,hemH  | 1087250 | 1088182 | 12.19 | 8.63  | 0.71 |
| BSU10140,hemY  | 1088197 | 1089609 | 8.52  | 6.76  | 0.79 |
| BSU10150,yhgD  | 1089755 | 1090330 | 1.83  | 2.04  | 1.11 |
| BSU10160,yhgE  | 1090401 | 1092728 | 10.21 | 6.06  | 0.59 |
| BSU10170,fabHB | 1092770 | 1093747 | 0.91  | 0.80  | 0.87 |
| BSU10180,yhfC  | 1093874 | 1094650 | 0.08  | 0.27  | 3.32 |
| BSU10200,yhfE  | 1095063 | 1096103 | 2.79  | 2.33  | 0.83 |
| BSU10210,yhfF  | 1096116 | 1096523 | 3.43  | 2.93  | 0.85 |

|                |         |         |       |        |      |
|----------------|---------|---------|-------|--------|------|
| BSU10220,glT   | 1096560 | 1097849 | 84.63 | 107.96 | 1.28 |
| BSU10230,yhfH  | 1098120 | 1098260 | 0.57  | 0.65   | 1.14 |
| BSU10240,yhfI  | 1098412 | 1099146 | 1.15  | 1.39   | 1.21 |
| BSU10250,yhfJ  | 1099159 | 1100154 | 2.42  | 2.06   | 0.85 |
| BSU10260,yhfK  | 1100219 | 1100863 | 4.32  | 5.75   | 1.33 |
| BSU10270,yhfL  | 1100980 | 1102521 | 1.24  | 1.00   | 0.81 |
| BSU10280,yhfM  | 1102560 | 1102955 | 0.39  | 0.63   | 1.60 |
| BSU10290,yhfN  | 1103104 | 1104384 | 1.06  | 1.30   | 1.22 |
| BSU10300,aprE  | 1104423 | 1105568 | 0.12  | 0.27   | 2.27 |
| BSU10310,yhfO  | 1106003 | 1106452 | 0.95  | 1.89   | 1.98 |
| BSU10320,yhfP  | 1106524 | 1107516 | 6.17  | 9.23   | 1.50 |
| BSU10330,yhfQ  | 1107733 | 1108704 | 24.10 | 18.95  | 0.79 |
| BSU10340,phoE  | 1108736 | 1109317 | 8.20  | 9.08   | 1.11 |
| BSU10350,yhfS  | 1109388 | 1110482 | 2.26  | 2.45   | 1.08 |
| BSU10360,yhfT  | 1110479 | 1111918 | 0.92  | 1.24   | 1.34 |
| BSU10370,bioY  | 1111925 | 1112485 | 0.35  | 0.41   | 1.16 |
| BSU10380,hemAT | 1112620 | 1113918 | 0.22  | 0.89   | 4.06 |
| BSU10390,yhfW  | 1114057 | 1115586 | 0.12  | 0.13   | 1.08 |
| BSU10400,yhxC  | 1115698 | 1116555 | 0.17  | 0.20   | 1.22 |
| BSU10410,yhzc  | 1116583 | 1116816 | 0.25  | 1.65   | 6.54 |
| BSU10420,comK  | 1117109 | 1117687 | 0.50  | 0.95   | 1.89 |
| BSU10430,yhxD  | 1117734 | 1118633 | 0.41  | 0.93   | 2.27 |
| BSU10440,yhjA  | 1118850 | 1119119 | 35.59 | 24.41  | 0.69 |
| BSU10450,yhjB  | 1119162 | 1120631 | 0.46  | 0.37   | 0.80 |
| BSU10460,yhjC  | 1120628 | 1120828 | 0.17  | 0.25   | 1.44 |
| BSU10470,yhjD  | 1121036 | 1121398 | 0.30  | 0.20   | 0.66 |
| BSU10480,yhjE  | 1121550 | 1122173 | 2.65  | 2.02   | 0.76 |
| BSU10490,sipV  | 1122175 | 1122681 | 3.28  | 2.23   | 0.68 |
| BSU10500,yhjG  | 1122862 | 1124361 | 0.50  | 0.61   | 1.21 |
| BSU10510,yhjH  | 1124438 | 1124965 | 2.62  | 2.56   | 0.98 |
| BSU10520,glcP  | 1125123 | 1126328 | 0.28  | 0.75   | 2.66 |
| BSU10530,ntdC  | 1126400 | 1127452 | 0.55  | 1.15   | 2.09 |
| BSU10540,ntdB  | 1127466 | 1128314 | 0.17  | 0.44   | 2.63 |
| BSU10550,ntdA  | 1128286 | 1129611 | 0.30  | 0.98   | 3.31 |
| BSU10560,yhjM  | 1129715 | 1130704 | 1.22  | 2.45   | 2.01 |
| BSU10570,yhjN  | 1130918 | 1132072 | 1.76  | 3.83   | 2.17 |
| BSU10580,yhjO  | 1132179 | 1133384 | 0.09  | 0.14   | 1.46 |
| BSU10590,yhjP  | 1133498 | 1135225 | 3.49  | 3.84   | 1.10 |
| BSU10600,yhjQ  | 1135255 | 1135581 | 0.22  | 0.23   | 1.06 |
| BSU10610,yhjR  | 1135699 | 1136136 | 0.11  | 0.17   | 1.53 |
| BSU10620,addB  | 1136320 | 1139820 | 9.81  | 11.01  | 1.12 |
| BSU10630,addA  | 1139807 | 1143505 | 11.41 | 12.31  | 1.08 |
| BSU10640,sbcD  | 1143577 | 1144752 | 7.02  | 14.48  | 2.06 |
| BSU10650,sbcC  | 1144749 | 1148141 | 8.23  | 18.74  | 2.28 |
| BSU10660,yisB  | 1148155 | 1148457 | 8.91  | 19.64  | 2.20 |
| BSU10670,gerPF | 1148494 | 1148721 | 0.48  | 0.33   | 0.68 |
| BSU10680,gerPE | 1148744 | 1149145 | 0.39  | 0.27   | 0.70 |

|                |         |         |       |       |      |
|----------------|---------|---------|-------|-------|------|
| BSU10690,gerPD | 1149145 | 1149321 | 0.49  | 0.37  | 0.77 |
| BSU10700,gerPC | 1149318 | 1149935 | 0.36  | 0.27  | 0.77 |
| BSU10710,gerPB | 1149958 | 1150200 | 0.30  | 0.24  | 0.81 |
| BSU10720,gerPA | 1150206 | 1150427 | 0.28  | 0.21  | 0.73 |
| BSU10730,yisI  | 1150850 | 1151020 | 0.58  | 2.86  | 4.93 |
| BSU10740,yisJ  | 1151166 | 1152089 | 0.07  | 0.12  | 1.72 |
| BSU10750,yisK  | 1152244 | 1153149 | 0.61  | 2.12  | 3.47 |
| BSU10760,yisL  | 1153265 | 1153621 | 3.54  | 4.66  | 1.32 |
| BSU10770,wprA  | 1153789 | 1156473 | 2.15  | 1.06  | 0.49 |
| BSU10780,yisN  | 1156504 | 1157091 | 0.08  | 0.07  | 0.84 |
| BSU10790,asnO  | 1157237 | 1159081 | 0.08  | 0.09  | 1.07 |
| BSU10800,yizA  | 1159211 | 1159690 | 0.51  | 0.64  | 1.25 |
| BSU10810,yisP  | 1159922 | 1160746 | 4.42  | 3.72  | 0.84 |
| BSU10820,yisQ  | 1160776 | 1162143 | 1.42  | 1.11  | 0.78 |
| BSU10830,yisR  | 1162267 | 1163130 | 1.98  | 1.88  | 0.95 |
| BSU10840,degA  | 1163148 | 1164161 | 2.96  | 3.04  | 1.03 |
| BSU10850,yisS  | 1164370 | 1165398 | 3.79  | 0.91  | 0.24 |
| BSU10860,yisT  | 1165449 | 1165958 | 0.49  | 1.55  | 3.19 |
| BSU10870,yisU  | 1166008 | 1166670 | 0.25  | 0.36  | 1.47 |
| BSU10880,yisV  | 1166737 | 1168191 | 1.13  | 1.25  | 1.11 |
| BSU10890,yisX  | 1168199 | 1168837 | 6.67  | 8.20  | 1.23 |
| BSU10900,yisY  | 1169043 | 1169849 | 0.84  | 0.82  | 0.98 |
| BSU10910,yisZ  | 1169877 | 1170476 | 0.27  | 0.28  | 1.03 |
| BSU10920,sat   | 1170473 | 1171642 | 0.20  | 0.17  | 0.83 |
| BSU10930,yitB  | 1171755 | 1172465 | 0.14  | 0.11  | 0.77 |
| BSU10940,yitC  | 1172650 | 1173336 | 0.10  | 0.09  | 0.90 |
| BSU10950,yitD  | 1173333 | 1174091 | 0.08  | 0.08  | 1.03 |
| BSU10960,yitE  | 1174136 | 1174765 | 0.07  | 0.09  | 1.24 |
| BSU10970,yitF  | 1174861 | 1175976 | 2.09  | 4.79  | 2.29 |
| BSU10980,yitG  | 1175985 | 1177253 | 1.35  | 2.79  | 2.07 |
| BSU10990,yitH  | 1177365 | 1178213 | 8.53  | 10.05 | 1.18 |
| BSU11000,yitI  | 1178218 | 1178682 | 7.38  | 8.31  | 1.13 |
| BSU11010,yitJ  | 1178757 | 1180595 | 0.24  | 0.65  | 2.66 |
| BSU11020,yitK  | 1180909 | 1181400 | 5.62  | 7.29  | 1.30 |
| BSU11030,yitL  | 1181499 | 1182395 | 6.48  | 4.77  | 0.74 |
| BSU11040,yitM  | 1182448 | 1183032 | 0.20  | 0.44  | 2.17 |
| BSU11055,yitO  | 1183029 | 1183958 | 0.16  | 0.17  | 1.02 |
| BSU11070,yitP  | 1183943 | 1184479 | 0.17  | 0.14  | 0.84 |
| BSU11079,yizB  | 1184657 | 1185004 | 2.90  | 2.03  | 0.70 |
| BSU11080,yitQ  | 1185001 | 1185588 | 4.08  | 2.84  | 0.70 |
| BSU11090,yitR  | 1185608 | 1185901 | 4.00  | 3.47  | 0.87 |
| BSU11100,nprB  | 1186037 | 1187653 | 0.34  | 0.45  | 1.33 |
| BSU11110,yitS  | 1187700 | 1188551 | 10.84 | 15.58 | 1.44 |
| BSU11120,yitT  | 1188689 | 1189531 | 14.80 | 7.95  | 0.54 |
| BSU11130,ipi   | 1189646 | 1190005 | 22.27 | 14.71 | 0.66 |
| BSU11139,yizC  | 1190036 | 1190233 | 12.27 | 10.21 | 0.83 |
| BSU11140,yitU  | 1190490 | 1191302 | 9.02  | 8.44  | 0.94 |

|                |         |         |        |        |      |
|----------------|---------|---------|--------|--------|------|
| BSU11150,yitV  | 1191423 | 1192190 | 1.59   | 1.40   | 0.88 |
| BSU11160,yitW  | 1192254 | 1192562 | 18.72  | 33.41  | 1.78 |
| BSU11170,yitY  | 1192858 | 1194288 | 4.52   | 2.92   | 0.65 |
| BSU11180,yitZ  | 1194333 | 1194827 | 7.59   | 3.85   | 0.51 |
| BSU11190,argC  | 1195034 | 1196071 | 0.14   | 0.20   | 1.48 |
| BSU11200,argJ  | 1196091 | 1197311 | 0.11   | 0.09   | 0.80 |
| BSU11210,argB  | 1197326 | 1198102 | 0.08   | 0.06   | 0.79 |
| BSU11220,argD  | 1198099 | 1199256 | 0.08   | 0.08   | 1.00 |
| BSU11230,carA  | 1199327 | 1200388 | 0.11   | 0.08   | 0.73 |
| BSU11240,carB  | 1200381 | 1203473 | 0.17   | 0.10   | 0.60 |
| BSU11250,argF  | 1203461 | 1204420 | 0.28   | 0.20   | 0.71 |
| BSU11260,yjzC  | 1204506 | 1204685 | 6.78   | 6.32   | 0.93 |
| BSU11270,yjzD  | 1204731 | 1204916 | 189.53 | 140.51 | 0.74 |
| BSU11280,yjaU  | 1205165 | 1205899 | 0.30   | 0.52   | 1.73 |
| BSU11290,yjaV  | 1205981 | 1206538 | 0.13   | 0.16   | 1.20 |
| BSU11300,med   | 1206629 | 1207582 | 18.81  | 11.66  | 0.62 |
| BSU11310,comZ  | 1207597 | 1207788 | 33.50  | 25.69  | 0.77 |
| BSU11320,yjzB  | 1207818 | 1208057 | 3.58   | 1.80   | 0.50 |
| BSU11330,fabHA | 1208222 | 1209160 | 15.62  | 8.30   | 0.53 |
| BSU11340,fabF  | 1209183 | 1210424 | 24.70  | 13.76  | 0.56 |
| BSU11350,yjaZ  | 1210500 | 1211285 | 0.07   | 0.09   | 1.27 |
| BSU11360,appD  | 1211477 | 1212463 | 0.13   | 0.29   | 2.27 |
| BSU11370,appF  | 1212460 | 1213449 | 0.12   | 0.48   | 3.92 |
| BSU11390,appB  | 1215243 | 1216193 | 0.26   | 0.47   | 1.79 |
| BSU11400,appC  | 1216210 | 1217121 | 0.24   | 0.37   | 1.54 |
| BSU11410,yjbA  | 1217326 | 1218078 | 0.25   | 0.51   | 2.02 |
| BSU11420,trpS  | 1218113 | 1219105 | 10.85  | 10.36  | 0.96 |
| BSU11430,oppA  | 1219849 | 1221486 | 0.80   | 4.92   | 6.11 |
| BSU11440,oppB  | 1221594 | 1222529 | 0.21   | 0.82   | 3.95 |
| BSU11450,oppC  | 1222533 | 1223450 | 0.56   | 1.34   | 2.37 |
| BSU11460,oppD  | 1223455 | 1224531 | 0.71   | 2.11   | 2.96 |
| BSU11470,oppF  | 1224533 | 1225450 | 0.95   | 2.99   | 3.14 |
| BSU11480,yjbB  | 1225557 | 1226774 | 1.01   | 0.66   | 0.65 |
| BSU11490,yjbC  | 1226938 | 1227516 | 8.84   | 7.77   | 0.88 |
| BSU11500,spxA  | 1227697 | 1228092 | 49.62  | 62.72  | 1.26 |
| BSU11510,yjbE  | 1228135 | 1228791 | 1.72   | 1.83   | 1.06 |
| BSU11520,mecA  | 1229068 | 1229724 | 12.77  | 25.15  | 1.97 |
| BSU11530,coiA  | 1229915 | 1231036 | 0.31   | 0.40   | 1.30 |
| BSU11540,pepF  | 1231083 | 1233095 | 3.59   | 4.53   | 1.26 |
| BSU11549,yizD  | 1233133 | 1233300 | 0.61   | 1.68   | 2.74 |
| BSU11550,yjbH  | 1233614 | 1234513 | 9.41   | 13.17  | 1.40 |
| BSU11560,yjbl  | 1234510 | 1234908 | 12.23  | 20.20  | 1.65 |
| BSU11570,yjbJ  | 1235163 | 1235708 | 3.99   | 7.90   | 1.98 |
| BSU11580,yjbK  | 1235912 | 1236484 | 2.06   | 2.97   | 1.44 |
| BSU11590,yjbL  | 1236609 | 1236977 | 2.99   | 2.67   | 0.89 |
| BSU11600,yjbM  | 1237006 | 1237641 | 13.42  | 8.88   | 0.66 |
| BSU11610,ppnK  | 1237660 | 1238460 | 18.27  | 14.13  | 0.77 |

|                 |         |         |       |       |       |
|-----------------|---------|---------|-------|-------|-------|
| BSU11620,yjbO   | 1238523 | 1239374 | 35.46 | 45.27 | 1.28  |
| BSU11630,yjbP   | 1239387 | 1240121 | 0.81  | 1.88  | 2.33  |
| BSU11640,yjbQ   | 1240356 | 1242200 | 1.80  | 1.30  | 0.72  |
| BSU11650,tenA   | 1242449 | 1243159 | 0.69  | 0.40  | 0.58  |
| BSU11660,tenI   | 1243134 | 1243751 | 1.20  | 0.57  | 0.48  |
| BSU11670,thiO   | 1243735 | 1244844 | 1.16  | 0.61  | 0.52  |
| BSU11680,thiS   | 1244844 | 1245044 | 1.28  | 0.86  | 0.67  |
| BSU11690,thiG   | 1245041 | 1245811 | 1.26  | 1.04  | 0.83  |
| BSU11700,thiF   | 1245808 | 1246818 | 1.19  | 0.68  | 0.57  |
| BSU11710,yjbV   | 1246837 | 1247652 | 1.44  | 0.77  | 0.54  |
| BSU11720,fabI   | 1247788 | 1248564 | 37.08 | 30.39 | 0.82  |
| BSU11730,cotO   | 1248665 | 1249348 | 0.94  | 1.46  | 1.56  |
| BSU11740,cotZ   | 1249442 | 1249888 | 0.11  | 0.17  | 1.51  |
| BSU11750,cotY   | 1250016 | 1250504 | 0.38  | 0.33  | 0.88  |
| BSU11760,cotX   | 1250656 | 1251174 | 0.18  | 0.27  | 1.48  |
| BSU11770,cotW   | 1251273 | 1251590 | 0.13  | 0.19  | 1.48  |
| BSU11780,cotV   | 1251631 | 1252017 | 0.17  | 0.17  | 0.99  |
| BSU11790,yjcA   | 1252177 | 1252533 | 0.34  | 0.29  | 0.85  |
| BSU11799,yjzK   | 1252815 | 1253021 | 0.13  | 0.19  | 1.41  |
| BSU11809,yjcZ   | 1253103 | 1253252 | 0.17  | 0.42  | 2.42  |
| BSU11810,spoVIF | 1253385 | 1253639 | 0.09  | 0.06  | 0.72  |
| BSU11820,yjcD   | 1253713 | 1255866 | 12.83 | 6.35  | 0.50  |
| BSU11839,yjzE   | 1256109 | 1256363 | 0.72  | 0.64  | 0.89  |
| BSU11840,yjcF   | 1256436 | 1256858 | 5.35  | 20.57 | 3.85  |
| BSU11850,yjcG   | 1256862 | 1257377 | 4.83  | 22.68 | 4.70  |
| BSU11860,yjcH   | 1257414 | 1258136 | 2.25  | 8.62  | 3.84  |
| BSU11870,yjcl   | 1258492 | 1259613 | 0.20  | 4.45  | 22.79 |
| BSU11880,yjcJ   | 1259606 | 1260778 | 0.37  | 8.26  | 22.35 |
| BSU11890,yjcK   | 1260811 | 1261356 | 0.31  | 1.06  | 3.37  |
| BSU11900,yjcl   | 1261426 | 1262616 | 0.11  | 0.36  | 3.19  |
| BSU11910,yjcM   | 1263702 | 1264931 | 2.08  | 3.99  | 1.92  |
| BSU11920,yjcN   | 1265057 | 1265377 | 42.49 | 41.64 | 0.98  |
| BSU11928,yjzF   | 1265530 | 1265661 | 0.13  | 0.19  | 1.53  |
| BSU11929,yjzG   | 1265677 | 1265850 | 0.15  | 0.19  | 1.24  |
| BSU11930,yjcO   | 1265887 | 1266348 | 0.17  | 0.24  | 1.44  |
| BSU11940,yjcP   | 1266614 | 1267117 | 0.15  | 0.70  | 4.68  |
| BSU11950,yjcQ   | 1267129 | 1267413 | 0.49  | 2.53  | 5.14  |
| BSU11960,yjcR   | 1267574 | 1268101 | 0.11  | 0.09  | 0.80  |
| BSU11970,yjcS   | 1268275 | 1268592 | 0.59  | 1.34  | 2.29  |
| BSU11980,yjdA   | 1268829 | 1269584 | 2.01  | 2.97  | 1.48  |
| BSU11990,yjdB   | 1269733 | 1270080 | 1.30  | 1.93  | 1.49  |
| BSU12000,manR   | 1270631 | 1272577 | 5.85  | 6.01  | 1.03  |
| BSU12010,manP   | 1272725 | 1274677 | 17.16 | 8.00  | 0.47  |
| BSU12020,manA   | 1274692 | 1275639 | 27.27 | 12.83 | 0.47  |
| BSU12030,yjdF   | 1275809 | 1276291 | 27.47 | 14.47 | 0.53  |
| BSU12040,yjdG   | 1276337 | 1276843 | 4.39  | 4.40  | 1.00  |
| BSU12050,yjdH   | 1277062 | 1277457 | 0.46  | 0.34  | 0.74  |

|               |         |         |       |       |      |
|---------------|---------|---------|-------|-------|------|
| BSU12060,yjdl | 1277686 | 1278165 | 3.76  | 3.65  | 0.97 |
| BSU12069,yjzH | 1278205 | 1278399 | 1.75  | 1.28  | 0.73 |
| BSU12070,yjdJ | 1278565 | 1278894 | 1.65  | 1.49  | 0.90 |
| BSU12080,ctaO | 1279514 | 1280503 | 0.45  | 0.30  | 0.66 |
| BSU12090,cotT | 1280626 | 1280949 | 0.26  | 0.22  | 0.84 |
| BSU12100,yjeA | 1281128 | 1282531 | 23.37 | 6.47  | 0.28 |
| BSU12110,yjfA | 1282571 | 1283044 | 0.58  | 0.30  | 0.52 |
| BSU12120,yjfb | 1283169 | 1283336 | 0.31  | 1.13  | 3.63 |
| BSU12130,yjfc | 1283463 | 1284362 | 0.20  | 0.17  | 0.84 |
| BSU12140,yjgA | 1284371 | 1284769 | 2.57  | 2.07  | 0.81 |
| BSU12150,yjgB | 1284870 | 1285445 | 0.07  | 0.10  | 1.36 |
| BSU12160,yjgC | 1285591 | 1288548 | 0.19  | 0.65  | 3.37 |
| BSU12170,yjgD | 1288541 | 1289101 | 0.32  | 1.15  | 3.63 |
| BSU12180,yjhA | 1289298 | 1289939 | 2.30  | 1.00  | 0.44 |
| BSU12190,yjhB | 1290018 | 1290644 | 3.88  | 2.48  | 0.64 |
| BSU12200,yjiA | 1290675 | 1290953 | 1.64  | 1.79  | 1.09 |
| BSU12210,yjiB | 1291344 | 1292534 | 1.78  | 3.66  | 2.05 |
| BSU12220,yjiC | 1292557 | 1293735 | 3.26  | 4.43  | 1.36 |
| BSU12229,yjzl | 1293776 | 1293964 | 4.49  | 4.96  | 1.11 |
| BSU12230,hemD | 1294138 | 1294950 | 11.36 | 14.93 | 1.31 |
| BSU12240,yjka | 1294996 | 1295748 | 5.12  | 6.90  | 1.35 |
| BSU12250,yjkb | 1295748 | 1296500 | 4.65  | 6.11  | 1.31 |
| BSU12260,yjla | 1296620 | 1297594 | 5.18  | 6.62  | 1.28 |
| BSU12270,yjlb | 1297726 | 1298223 | 0.42  | 0.81  | 1.95 |
| BSU12280,rex  | 1298612 | 1299034 | 35.85 | 31.52 | 0.88 |
| BSU12290,ndh  | 1299074 | 1300252 | 52.04 | 52.51 | 1.01 |
| BSU12300,uxaC | 1300450 | 1301871 | 0.57  | 0.18  | 0.31 |
| BSU12310,exuM | 1301939 | 1303318 | 0.41  | 0.23  | 0.57 |
| BSU12320,yjmC | 1303423 | 1304436 | 0.06  | 0.04  | 0.76 |
| BSU12330,yjmD | 1304442 | 1305461 | 0.07  | 0.06  | 0.95 |
| BSU12340,uxuA | 1305486 | 1306565 | 0.20  | 0.12  | 0.59 |
| BSU12350,yjmF | 1306562 | 1307398 | 0.09  | 0.07  | 0.76 |
| BSU12360,exuT | 1307446 | 1308714 | 0.11  | 0.07  | 0.61 |
| BSU12370,exuR | 1308802 | 1309803 | 2.94  | 3.17  | 1.08 |
| BSU12380,uxaB | 1309880 | 1311322 | 0.50  | 0.22  | 0.44 |
| BSU12390,uxaA | 1311319 | 1312812 | 0.86  | 0.32  | 0.38 |
| BSU12400,yjnA | 1312851 | 1313615 | 0.16  | 0.18  | 1.12 |
| BSU12410,yjoA | 1313840 | 1314304 | 3.85  | 4.01  | 1.04 |
| BSU12420,yjoB | 1314453 | 1315724 | 3.10  | 1.44  | 0.46 |
| BSU12430,rapA | 1315869 | 1317005 | 2.60  | 3.18  | 1.22 |
| BSU12440,phrA | 1316995 | 1317129 | 4.72  | 6.41  | 1.36 |
| BSU12450,yjpA | 1317157 | 1317414 | 3.93  | 2.70  | 0.69 |
| BSU12460,xlyB | 1317535 | 1318488 | 0.59  | 0.37  | 0.62 |
| BSU12470,yjqA | 1318528 | 1318905 | 4.12  | 3.87  | 0.94 |
| BSU12480,yjqB | 1319011 | 1319613 | 1.50  | 1.09  | 0.73 |
| BSU12490,yjqC | 1319690 | 1320526 | 10.22 | 7.73  | 0.76 |
| BSU12500,xkdA | 1320570 | 1321166 | 0.32  | 0.56  | 1.76 |

|                  |         |         |       |       |      |
|------------------|---------|---------|-------|-------|------|
| BSU12510,xre     | 1321329 | 1321670 | 4.68  | 5.40  | 1.15 |
| BSU12519,yjzJ    | 1321848 | 1322027 | 0.11  | 0.08  | 0.66 |
| BSU12520,xkdB    | 1322014 | 1322850 | 0.14  | 0.10  | 0.68 |
| BSU12530,xkdC    | 1322750 | 1323550 | 0.30  | 0.19  | 0.64 |
| BSU12539,ykzK    | 1323550 | 1323717 | 0.35  | 0.23  | 0.65 |
| BSU12540,xkdD    | 1323802 | 1324152 | 0.42  | 0.21  | 0.49 |
| BSU12550,xtrA    | 1324149 | 1324355 | 0.44  | 0.28  | 0.64 |
| BSU12560,xpf     | 1324471 | 1324980 | 0.12  | 0.07  | 0.54 |
| BSU12570,xtmA    | 1325096 | 1325893 | 1.77  | 0.99  | 0.56 |
| BSU12580,xtmB    | 1325890 | 1327191 | 2.10  | 1.18  | 0.56 |
| BSU12590,xkdE    | 1327195 | 1328682 | 1.71  | 0.97  | 0.56 |
| BSU12600,xkdF    | 1328702 | 1329529 | 1.36  | 0.70  | 0.51 |
| BSU12610,xkdG    | 1329555 | 1330490 | 1.14  | 0.60  | 0.53 |
| BSU12619,ykzL    | 1330512 | 1330895 | 1.55  | 0.89  | 0.58 |
| BSU12620,xkdH    | 1330892 | 1331248 | 1.20  | 0.72  | 0.60 |
| BSU12630,xkdI    | 1331245 | 1331730 | 0.96  | 0.51  | 0.53 |
| BSU12640,xkdJ    | 1331743 | 1332183 | 0.96  | 0.52  | 0.54 |
| BSU12649,ykzM    | 1332187 | 1332405 | 1.59  | 0.78  | 0.49 |
| BSU12650,xkdK    | 1332402 | 1333802 | 1.81  | 0.97  | 0.53 |
| BSU12660,xkdM    | 1333804 | 1334247 | 2.40  | 1.44  | 0.60 |
| BSU12671,xkdN    | 1334339 | 1334785 | 0.68  | 0.55  | 0.82 |
| BSU12672,xkzB    | 1334815 | 1334964 | 0.42  | 0.28  | 0.66 |
| BSU12680,xkdO    | 1334966 | 1338964 | 1.02  | 0.60  | 0.58 |
| BSU12690,xkdP    | 1338957 | 1339616 | 0.92  | 0.56  | 0.60 |
| BSU12700,xkdQ    | 1339632 | 1340609 | 0.63  | 0.40  | 0.65 |
| BSU12710,xkdR    | 1340609 | 1340875 | 0.74  | 0.45  | 0.61 |
| BSU12720,xkdS    | 1340932 | 1341357 | 0.74  | 0.34  | 0.47 |
| BSU12730,xkdT    | 1341350 | 1342396 | 0.66  | 0.38  | 0.57 |
| BSU12740,xkdU    | 1342380 | 1342958 | 0.61  | 0.48  | 0.78 |
| BSU12749,xkzA    | 1342955 | 1343227 | 0.78  | 0.52  | 0.68 |
| BSU12750,xkdV    | 1343230 | 1345293 | 0.68  | 0.45  | 0.65 |
| BSU12760,xkdW    | 1345305 | 1345634 | 1.09  | 0.59  | 0.54 |
| BSU12770,xkdX    | 1345631 | 1345795 | 1.17  | 0.64  | 0.55 |
| BSU12780,xepA    | 1345839 | 1346678 | 1.03  | 0.61  | 0.59 |
| BSU12790,xhlA    | 1346731 | 1347000 | 1.37  | 0.84  | 0.62 |
| BSU12800,xhlB    | 1347013 | 1347276 | 1.46  | 0.96  | 0.65 |
| BSU12810,xlyA    | 1347289 | 1348182 | 1.46  | 1.05  | 0.72 |
| BSU12820,spolISB | 1348442 | 1348612 | 12.87 | 19.57 | 1.52 |
| BSU12830,spolISA | 1348612 | 1349358 | 4.67  | 5.39  | 1.16 |
| BSU12840,pit     | 1349468 | 1350469 | 19.97 | 11.21 | 0.56 |
| BSU12850,ykaA    | 1350482 | 1351099 | 15.46 | 10.91 | 0.71 |
| BSU12860,ykbA    | 1351375 | 1352691 | 7.20  | 6.75  | 0.94 |
| BSU12870,mhqA    | 1353080 | 1354030 | 0.61  | 1.07  | 1.74 |
| BSU12880,ykcB    | 1354285 | 1356435 | 0.15  | 0.26  | 1.71 |
| BSU12890,ykcC    | 1356447 | 1357418 | 0.17  | 0.33  | 1.93 |
| BSU12900,htrA    | 1357936 | 1359285 | 7.60  | 4.94  | 0.65 |
| BSU12910,proG    | 1359454 | 1360272 | 1.09  | 1.28  | 1.17 |



|                |         |         |       |       |       |
|----------------|---------|---------|-------|-------|-------|
| BSU12920,dppA  | 1360401 | 1361225 | 0.07  | 0.14  | 2.07  |
| BSU12930,dppB  | 1361242 | 1362168 | 0.10  | 0.10  | 0.99  |
| BSU12940,dppC  | 1362174 | 1363136 | 0.12  | 0.13  | 1.12  |
| BSU12950,dppD  | 1363141 | 1364148 | 0.08  | 0.14  | 1.63  |
| BSU12960,dppE  | 1364151 | 1365800 | 0.13  | 0.25  | 1.95  |
| BSU12970,ykfA  | 1365888 | 1366847 | 0.09  | 0.15  | 1.68  |
| BSU12980,ykfB  | 1366844 | 1367944 | 0.16  | 0.24  | 1.51  |
| BSU12990,ykfC  | 1367941 | 1368831 | 0.21  | 0.35  | 1.67  |
| BSU13000,ykfD  | 1368844 | 1369833 | 0.26  | 0.70  | 2.70  |
| BSU13010,ykgB  | 1369876 | 1370925 | 5.43  | 6.08  | 1.12  |
| BSU13020,ykgA  | 1371015 | 1371875 | 0.23  | 0.28  | 1.26  |
| BSU13030,ykhA  | 1372035 | 1372553 | 9.01  | 9.37  | 1.04  |
| BSU13040,hmp   | 1372792 | 1373991 | 0.46  | 0.90  | 1.97  |
| BSU13050,ykzH  | 1374068 | 1374292 | 0.19  | 0.25  | 1.32  |
| BSU13060,ykjA  | 1374437 | 1375168 | 0.10  | 0.17  | 1.65  |
| BSU13070,ykkA  | 1375260 | 1375787 | 0.11  | 0.19  | 1.77  |
| BSU13080,ykkB  | 1375777 | 1376295 | 0.11  | 0.24  | 2.23  |
| BSU13090,ykkC  | 1376517 | 1376855 | 1.22  | 0.95  | 0.78  |
| BSU13100,ykkD  | 1376855 | 1377172 | 1.38  | 1.01  | 0.73  |
| BSU13110,purU  | 1377243 | 1378145 | 10.82 | 20.69 | 1.91  |
| BSU13120,proB  | 1378496 | 1379593 | 5.79  | 7.53  | 1.30  |
| BSU13130,proA  | 1379605 | 1380852 | 10.55 | 16.92 | 1.60  |
| BSU13140,ohrA  | 1380978 | 1381403 | 1.07  | 2.72  | 2.54  |
| BSU13150,ohrR  | 1381434 | 1381877 | 1.76  | 1.54  | 0.87  |
| BSU13160,ohrB  | 1382020 | 1382430 | 0.40  | 2.95  | 7.31  |
| BSU13169,ykzN  | 1382457 | 1382627 | 0.10  | 0.75  | 7.74  |
| BSU13170,guaD  | 1382677 | 1383147 | 0.23  | 1.28  | 5.59  |
| BSU13180,metE  | 1383320 | 1385608 | 0.32  | 5.91  | 18.42 |
| BSU13190,ispA  | 1386024 | 1386983 | 0.42  | 0.45  | 1.09  |
| BSU13200,rsbRB | 1387206 | 1388039 | 3.88  | 3.49  | 0.90  |
| BSU13210,thiX  | 1388070 | 1388834 | 1.20  | 0.92  | 0.77  |
| BSU13220,thiW  | 1388809 | 1390452 | 1.04  | 0.92  | 0.89  |
| BSU13230,thiV  | 1390439 | 1391038 | 0.99  | 0.93  | 0.94  |
| BSU13240,thiU  | 1391040 | 1391642 | 0.64  | 0.86  | 1.36  |
| BSU13250,ykoG  | 1391953 | 1392639 | 0.49  | 0.45  | 0.92  |
| BSU13260,ykoH  | 1392643 | 1394007 | 1.55  | 0.91  | 0.59  |
| BSU13270,ykoI  | 1394004 | 1394684 | 2.10  | 1.04  | 0.49  |
| BSU13280,ykoJ  | 1394776 | 1395288 | 3.44  | 2.68  | 0.78  |
| BSU13290,ykzD  | 1395371 | 1395508 | 0.38  | 0.34  | 0.90  |
| BSU13300,mgtE  | 1396013 | 1397368 | 7.26  | 4.79  | 0.66  |
| BSU13310,tnrA  | 1397411 | 1397743 | 2.77  | 3.67  | 1.32  |
| BSU13320,ykzB  | 1397938 | 1398093 | 2.08  | 3.66  | 1.76  |
| BSU13330,ykoL  | 1398181 | 1398363 | 0.09  | 0.08  | 0.80  |
| BSU13340,ykoM  | 1398496 | 1398960 | 3.92  | 5.97  | 1.52  |
| BSU13350,ykoN  | 1398975 | 1400096 | 0.17  | 0.16  | 0.93  |
| BSU13360,ykoP  | 1400188 | 1400739 | 0.07  | 0.08  | 1.07  |
| BSU13370,ykoQ  | 1400767 | 1401579 | 0.45  | 0.33  | 0.72  |

|                |         |         |       |       |       |
|----------------|---------|---------|-------|-------|-------|
| BSU13380,ykoS  | 1401772 | 1403466 | 0.24  | 0.23  | 0.95  |
| BSU13390,ykoT  | 1403479 | 1404492 | 0.64  | 0.66  | 1.04  |
| BSU13400,ligD  | 1404518 | 1406353 | 0.60  | 0.81  | 1.36  |
| BSU13410,ykoV  | 1406357 | 1407292 | 0.08  | 0.36  | 4.27  |
| BSU13420,ykoW  | 1407329 | 1409578 | 0.20  | 0.28  | 1.42  |
| BSU13430,ykoX  | 1409912 | 1410577 | 7.21  | 5.27  | 0.73  |
| BSU13440,ykoY  | 1410654 | 1411628 | 2.26  | 2.58  | 1.14  |
| BSU13450,sigl  | 1411892 | 1412647 | 2.05  | 1.99  | 0.97  |
| BSU13460,rsgl  | 1412644 | 1413789 | 3.72  | 2.84  | 0.76  |
| BSU13470,sspD  | 1413800 | 1413994 | 12.38 | 6.98  | 0.56  |
| BSU13480,ykrK  | 1414125 | 1414826 | 10.33 | 11.03 | 1.07  |
| BSU13490,ykrL  | 1414997 | 1415893 | 46.98 | 21.01 | 0.45  |
| BSU13500,ktrD  | 1416067 | 1417416 | 27.80 | 14.51 | 0.52  |
| BSU13509,ykzP  | 1417561 | 1417716 | 0.41  | 1.05  | 2.58  |
| BSU13510,ykzE  | 1417719 | 1417895 | 0.23  | 0.79  | 3.44  |
| BSU13520,ykrP  | 1417938 | 1418960 | 2.35  | 1.09  | 0.46  |
| BSU13530,kinE  | 1419213 | 1421429 | 0.24  | 0.79  | 3.32  |
| BSU13540,ogt   | 1421426 | 1421923 | 3.02  | 5.53  | 1.83  |
| BSU13550,mtnA  | 1422172 | 1423233 | 0.22  | 1.86  | 8.28  |
| BSU13560,mtnK  | 1423241 | 1424440 | 0.50  | 2.09  | 4.15  |
| BSU13570,mtnU  | 1424767 | 1425546 | 0.96  | 2.48  | 2.57  |
| BSU13580,ykrV  | 1425641 | 1426837 | 0.85  | 2.26  | 2.65  |
| BSU13590,mtnW  | 1427034 | 1428278 | 0.30  | 6.33  | 21.22 |
| BSU13600,mtnX  | 1428275 | 1428982 | 0.44  | 9.04  | 20.66 |
| BSU13610,mtnB  | 1428940 | 1429569 | 0.56  | 15.38 | 27.53 |
| BSU13620,mtnD  | 1429584 | 1430120 | 1.16  | 22.74 | 19.54 |
| BSU13630,ykvA  | 1430161 | 1430481 | 5.33  | 7.07  | 1.33  |
| BSU13640,spoOE | 1430684 | 1430941 | 43.16 | 28.65 | 0.66  |
| BSU13650,eag   | 1431027 | 1431458 | 2.39  | 2.30  | 0.96  |
| BSU13660,kinD  | 1431486 | 1433006 | 21.73 | 47.50 | 2.19  |
| BSU13670,mhqR  | 1433199 | 1433636 | 32.77 | 15.11 | 0.46  |
| BSU13680,motB  | 1433676 | 1434461 | 0.64  | 2.49  | 3.88  |
| BSU13690,motA  | 1434433 | 1435245 | 0.18  | 1.48  | 8.17  |
| BSU13700,clpE  | 1435628 | 1437727 | 4.05  | 1.77  | 0.44  |
| BSU13710,ykvI  | 1438092 | 1439135 | 0.10  | 0.09  | 0.93  |
| BSU13720,queC  | 1439448 | 1440107 | 7.11  | 2.27  | 0.32  |
| BSU13730,queD  | 1440100 | 1440549 | 10.26 | 3.65  | 0.36  |
| BSU13740,queE  | 1440542 | 1441273 | 13.54 | 4.95  | 0.37  |
| BSU13750,ykvM  | 1441291 | 1441788 | 19.29 | 8.66  | 0.45  |
| BSU13760,ykvN  | 1442347 | 1442703 | 0.43  | 0.92  | 2.16  |
| BSU13770,ykvO  | 1442872 | 1443618 | 0.28  | 0.65  | 2.37  |
| BSU13780,ykvP  | 1444099 | 1445298 | 0.13  | 0.21  | 1.59  |
| BSU13789,ykzQ  | 1445314 | 1445541 | 0.33  | 0.63  | 1.92  |
| BSU13790,ykvQ  | 1445638 | 1446336 | 0.40  | 0.48  | 1.20  |
| BSU13799,ykzR  | 1446317 | 1446568 | 0.48  | 0.46  | 0.96  |
| BSU13800,ykvR  | 1447251 | 1447541 | 0.32  | 1.07  | 3.29  |
| BSU13810,ykvS  | 1447662 | 1447847 | 1.73  | 5.46  | 3.15  |

|               |         |         |        |       |      |
|---------------|---------|---------|--------|-------|------|
| BSU13819,ykzS | 1448013 | 1448207 | 1.76   | 1.27  | 0.72 |
| BSU13820,ykvT | 1448506 | 1449132 | 0.36   | 0.38  | 1.08 |
| BSU13830,ykvU | 1449250 | 1450587 | 0.31   | 0.26  | 0.85 |
| BSU13840,stoA | 1450638 | 1451135 | 2.49   | 3.84  | 1.54 |
| BSU13850,zosA | 1451371 | 1453284 | 1.57   | 1.81  | 1.15 |
| BSU13860,ykvY | 1453691 | 1454782 | 8.29   | 7.36  | 0.89 |
| BSU13870,ykvZ | 1455064 | 1456029 | 1.57   | 1.75  | 1.11 |
| BSU13880,glcT | 1456092 | 1456958 | 9.27   | 5.41  | 0.58 |
| BSU13890,ptsG | 1457187 | 1459286 | 45.35  | 11.82 | 0.26 |
| BSU13900,ptsH | 1459384 | 1459650 | 96.02  | 42.12 | 0.44 |
| BSU13910,ptsI | 1459650 | 1461362 | 103.26 | 41.12 | 0.40 |
| BSU13920,splA | 1461453 | 1461692 | 1.41   | 4.25  | 3.01 |
| BSU13930,splB | 1461770 | 1462798 | 1.38   | 4.33  | 3.15 |
| BSU13940,ykwB | 1462813 | 1463493 | 0.07   | 0.23  | 3.40 |
| BSU13950,mcpC | 1463628 | 1465595 | 0.26   | 0.87  | 3.36 |
| BSU13960,ykwC | 1465733 | 1466599 | 12.60  | 14.27 | 1.13 |
| BSU13970,ykwD | 1466638 | 1467411 | 0.40   | 1.51  | 3.73 |
| BSU13980,pbpH | 1467805 | 1469862 | 3.00   | 2.73  | 0.91 |
| BSU13990,kinA | 1470026 | 1471846 | 0.42   | 1.29  | 3.10 |
| BSU14000,patA | 1471857 | 1473038 | 17.53  | 18.26 | 1.04 |
| BSU14009,ykzT | 1473240 | 1473401 | 5.56   | 4.99  | 0.90 |
| BSU14010,cheV | 1473605 | 1474516 | 0.57   | 1.77  | 3.12 |
| BSU14020,ykyB | 1474560 | 1475024 | 8.61   | 15.08 | 1.75 |
| BSU14030,ykuC | 1475150 | 1476442 | 11.95  | 14.14 | 1.18 |
| BSU14040,ykuD | 1476518 | 1477012 | 2.19   | 2.50  | 1.14 |
| BSU14050,ykuE | 1477069 | 1477929 | 1.76   | 2.35  | 1.34 |
| BSU14060,ykuF | 1478072 | 1478836 | 0.13   | 0.17  | 1.29 |
| BSU14071,fadG | 1479137 | 1480867 | 1.35   | 1.06  | 0.78 |
| BSU14072,ykzU | 1480933 | 1481451 | 2.29   | 1.77  | 0.77 |
| BSU14080,ykuH | 1481547 | 1482095 | 1.42   | 3.65  | 2.57 |
| BSU14090,ykul | 1482248 | 1483471 | 5.22   | 11.44 | 2.19 |
| BSU14100,ykuJ | 1484117 | 1484356 | 21.12  | 18.34 | 0.87 |
| BSU14110,ykuK | 1484466 | 1484984 | 18.92  | 16.31 | 0.86 |
| BSU14120,ykzF | 1485118 | 1485315 | 12.09  | 17.88 | 1.48 |
| BSU14130,ykuL | 1485453 | 1485896 | 0.92   | 1.52  | 1.64 |
| BSU14140,ccpC | 1486045 | 1486926 | 12.03  | 8.55  | 0.71 |
| BSU14150,ykuN | 1487038 | 1487514 | 3.25   | 1.74  | 0.53 |
| BSU14160,ykuO | 1487504 | 1488397 | 2.70   | 1.39  | 0.52 |
| BSU14170,ykuP | 1488413 | 1488868 | 2.35   | 1.40  | 0.59 |
| BSU14180,dapH | 1488973 | 1489683 | 13.26  | 10.68 | 0.81 |
| BSU14190,dapL | 1489753 | 1490877 | 7.27   | 12.20 | 1.68 |
| BSU14200,ykuS | 1490939 | 1491184 | 8.56   | 13.18 | 1.54 |
| BSU14210,ykuT | 1491221 | 1492024 | 1.43   | 1.72  | 1.20 |
| BSU14220,ykuU | 1492261 | 1492803 | 2.60   | 2.62  | 1.01 |
| BSU14230,ykuV | 1492875 | 1493321 | 2.61   | 2.01  | 0.77 |
| BSU14240,rok  | 1493787 | 1494362 | 13.43  | 16.91 | 1.26 |
| BSU14250,yknT | 1494403 | 1495368 | 1.02   | 0.54  | 0.53 |

|                |         |         |        |        |      |
|----------------|---------|---------|--------|--------|------|
| BSU14260,mobA  | 1495505 | 1496104 | 2.43   | 1.26   | 0.52 |
| BSU14270,moeB  | 1496155 | 1497174 | 8.09   | 5.20   | 0.64 |
| BSU14280,moeA  | 1497192 | 1498484 | 16.31  | 12.38  | 0.76 |
| BSU14290,mobB  | 1498445 | 1498966 | 17.74  | 14.22  | 0.80 |
| BSU14300,moaE  | 1498966 | 1499439 | 18.26  | 14.46  | 0.79 |
| BSU14310,moaD  | 1499432 | 1499665 | 13.39  | 10.23  | 0.76 |
| BSU14320,yknU  | 1499889 | 1501646 | 0.09   | 0.19   | 2.10 |
| BSU14330,yknV  | 1501658 | 1503472 | 0.11   | 0.21   | 1.92 |
| BSU14340,yknW  | 1503582 | 1504277 | 3.63   | 2.22   | 0.61 |
| BSU14350,yknX  | 1504282 | 1505415 | 2.54   | 1.53   | 0.60 |
| BSU14360,yknY  | 1505416 | 1506108 | 7.39   | 3.08   | 0.42 |
| BSU14370,yknZ  | 1506105 | 1507298 | 10.40  | 4.72   | 0.45 |
| BSU14380,fruR  | 1507578 | 1508333 | 1.65   | 1.46   | 0.89 |
| BSU14390,fruK  | 1508330 | 1509241 | 2.60   | 1.99   | 0.77 |
| BSU14400,fruA  | 1509256 | 1511163 | 12.46  | 5.76   | 0.46 |
| BSU14410,sipT  | 1511308 | 1511889 | 18.64  | 28.88  | 1.55 |
| BSU14420,ykoA  | 1511923 | 1512192 | 3.76   | 6.18   | 1.64 |
| BSU14430,ykpA  | 1512373 | 1513995 | 46.52  | 29.95  | 0.64 |
| BSU14440,ykpB  | 1514052 | 1514963 | 8.17   | 27.33  | 3.35 |
| BSU14450,ampS  | 1514997 | 1516229 | 4.01   | 4.70   | 1.17 |
| BSU14460,ykpC  | 1516339 | 1516473 | 15.81  | 3.91   | 0.25 |
| BSU14470,mreBH | 1516574 | 1517581 | 7.97   | 2.16   | 0.27 |
| BSU14480,abh   | 1517865 | 1518143 | 18.98  | 10.52  | 0.55 |
| BSU14490,kinC  | 1518333 | 1519619 | 4.49   | 3.92   | 0.87 |
| BSU14500,ykqA  | 1519635 | 1520468 | 7.72   | 6.04   | 0.78 |
| BSU14510,ktrC  | 1520531 | 1521196 | 23.22  | 24.69  | 1.06 |
| BSU14520,adeC  | 1521351 | 1523084 | 16.34  | 57.26  | 3.50 |
| BSU14530,rnjA  | 1523118 | 1524785 | 0.61   | 0.82   | 1.35 |
| BSU14540,ykzG  | 1524791 | 1525000 | 18.79  | 25.25  | 1.34 |
| BSU14550,ykrA  | 1525386 | 1526159 | 3.00   | 1.75   | 0.58 |
| BSU14560,def   | 1526195 | 1526749 | 6.57   | 6.44   | 0.98 |
| BSU14569,ykzV  | 1526859 | 1527017 | 0.19   | 0.30   | 1.55 |
| BSU14570,ykyA  | 1527231 | 1527902 | 1.51   | 0.98   | 0.65 |
| BSU14580,pdhA  | 1528326 | 1529441 | 83.30  | 54.17  | 0.65 |
| BSU14590,pdhB  | 1529445 | 1530422 | 87.22  | 57.72  | 0.66 |
| BSU14600,pdhC  | 1530537 | 1531865 | 172.27 | 127.52 | 0.74 |
| BSU14610,pdhD  | 1531870 | 1533282 | 191.21 | 167.45 | 0.88 |
| BSU14620,slp   | 1533327 | 1533701 | 1.22   | 0.88   | 0.72 |
| BSU14629,ykzW  | 1534120 | 1534239 | 7.71   | 1.35   | 0.17 |
| BSU14630,speA  | 1534279 | 1535751 | 20.61  | 5.73   | 0.28 |
| BSU14640,yktA  | 1535936 | 1536202 | 3.63   | 5.37   | 1.48 |
| BSU14650,yktB  | 1536235 | 1536873 | 7.48   | 11.56  | 1.55 |
| BSU14660,ykzI  | 1537113 | 1537301 | 0.14   | 1.26   | 9.08 |
| BSU14670,suhB  | 1537441 | 1538238 | 2.77   | 4.26   | 1.54 |
| BSU14680,ykzC  | 1538264 | 1538692 | 6.02   | 5.94   | 0.99 |
| BSU14690,yktD  | 1538770 | 1539684 | 1.55   | 0.98   | 0.63 |
| BSU14700,nprE  | 1540036 | 1541601 | 0.75   | 0.86   | 1.14 |

|               |         |         |         |        |      |
|---------------|---------|---------|---------|--------|------|
| BSU14710,ylaA | 1541886 | 1543826 | 0.57    | 0.30   | 0.52 |
| BSU14720,ylaB | 1543816 | 1544085 | 1.38    | 0.82   | 0.59 |
| BSU14730,ylaC | 1544085 | 1544606 | 2.22    | 1.25   | 0.56 |
| BSU14740,ylaD | 1544603 | 1544896 | 2.39    | 1.26   | 0.53 |
| BSU14750,ylaE | 1544936 | 1545547 | 1.00    | 1.74   | 1.73 |
| BSU14760,ylaF | 1545820 | 1546008 | 16.59   | 19.10  | 1.15 |
| BSU14770,bipA | 1546121 | 1547959 | 56.29   | 40.29  | 0.72 |
| BSU14780,ylaH | 1548016 | 1548333 | 297.34  | 613.99 | 2.06 |
| BSU14790,ylaI | 1548389 | 1548598 | 2.50    | 3.15   | 1.26 |
| BSU14800,ylaJ | 1548681 | 1549310 | 0.20    | 0.30   | 1.49 |
| BSU14810,ylaK | 1549465 | 1550793 | 1.13    | 1.13   | 1.00 |
| BSU14820,ylaL | 1550797 | 1551282 | 5.89    | 5.49   | 0.93 |
| BSU14830,ylaM | 1551385 | 1552314 | 0.43    | 0.39   | 0.90 |
| BSU14840,ylaN | 1552412 | 1552693 | 25.90   | 25.62  | 0.99 |
| BSU14850,ftsW | 1552899 | 1554110 | 13.26   | 20.78  | 1.57 |
| BSU14860,pycA | 1554185 | 1557631 | 71.63   | 132.40 | 1.85 |
| BSU14870,ctaA | 1558034 | 1558954 | 18.50   | 11.65  | 0.63 |
| BSU14880,ctaB | 1559309 | 1560226 | 30.94   | 23.77  | 0.77 |
| BSU14890,ctaC | 1560466 | 1561536 | 0.59    | 0.57   | 0.96 |
| BSU14900,ctaD | 1561569 | 1563437 | 1.48    | 1.07   | 0.72 |
| BSU14910,ctaE | 1563437 | 1564060 | 1.73    | 1.17   | 0.68 |
| BSU14920,ctaF | 1564063 | 1564395 | 2.04    | 1.59   | 0.78 |
| BSU14930,ctaG | 1564422 | 1565315 | 1.32    | 1.11   | 0.84 |
| BSU14940,ylbA | 1565347 | 1565709 | 3.59    | 2.89   | 0.81 |
| BSU14950,ylbB | 1565849 | 1566295 | 0.70    | 0.64   | 0.92 |
| BSU14960,ylbC | 1566379 | 1567419 | 2.45    | 2.56   | 1.04 |
| BSU14970,ylbD | 1567651 | 1568049 | 0.34    | 0.37   | 1.08 |
| BSU14980,ylbE | 1568065 | 1568304 | 0.31    | 0.52   | 1.64 |
| BSU14990,ylbF | 1568420 | 1568869 | 29.73   | 18.54  | 0.62 |
| BSU15000,ylbG | 1568924 | 1569196 | 15.41   | 12.08  | 0.78 |
| BSU15010,ylbH | 1569519 | 1570073 | 12.57   | 7.28   | 0.58 |
| BSU15020,coaD | 1570078 | 1570563 | 18.74   | 11.76  | 0.63 |
| BSU15030,ylbJ | 1570574 | 1571800 | 1.34    | 1.50   | 1.13 |
| BSU15040,ylbK | 1571981 | 1572763 | 2.63    | 3.03   | 1.15 |
| BSU15050,ylbL | 1572765 | 1573790 | 4.94    | 4.70   | 0.95 |
| BSU15060,ylbM | 1573807 | 1575054 | 2.91    | 2.97   | 1.02 |
| BSU15069,ylzH | 1575051 | 1575236 | 5.08    | 5.70   | 1.12 |
| BSU15070,ylbN | 1575264 | 1575782 | 269.19  | 144.95 | 0.54 |
| BSU15080,rpmF | 1575804 | 1575983 | 1088.06 | 852.95 | 0.78 |
| BSU15090,ylbO | 1576129 | 1576710 | 1.03    | 4.64   | 4.51 |
| BSU15100,ylbP | 1576767 | 1577249 | 0.30    | 0.40   | 1.36 |
| BSU15110,ylbQ | 1577409 | 1578305 | 1.43    | 1.97   | 1.38 |
| BSU15120,yllA | 1578376 | 1579995 | 10.55   | 5.50   | 0.52 |
| BSU15130,yllB | 1580121 | 1580552 | 14.37   | 20.92  | 1.46 |
| BSU15140,mraW | 1580622 | 1581557 | 27.30   | 240.06 | 8.79 |
| BSU15150,ftsL | 1581597 | 1581950 | 31.28   | 40.57  | 1.30 |
| BSU15160,ppbB | 1581947 | 1584097 | 7.48    | 6.29   | 0.84 |

|                  |         |         |        |        |       |
|------------------|---------|---------|--------|--------|-------|
| BSU15170,spoVD   | 1584214 | 1586154 | 0.36   | 0.18   | 0.51  |
| BSU15180,murE    | 1586330 | 1587814 | 12.04  | 4.82   | 0.40  |
| BSU15190,mraY    | 1587926 | 1588900 | 24.20  | 9.52   | 0.39  |
| BSU15200,murD    | 1588901 | 1590256 | 41.11  | 19.72  | 0.48  |
| BSU15210,spoVE   | 1590317 | 1591417 | 56.27  | 32.89  | 0.58  |
| BSU15220,murG    | 1591540 | 1592631 | 9.63   | 2.97   | 0.31  |
| BSU15230,murB    | 1592663 | 1593574 | 18.63  | 6.81   | 0.37  |
| BSU15240,divIB   | 1593704 | 1594495 | 3.05   | 2.23   | 0.73  |
| BSU15250,ylxW    | 1594492 | 1595187 | 4.68   | 2.84   | 0.61  |
| BSU15260,ylxX    | 1595210 | 1595917 | 11.88  | 11.15  | 0.94  |
| BSU15270,ebp     | 1595935 | 1596300 | 5.30   | 6.69   | 1.26  |
| BSU15280,ftsA    | 1596474 | 1597796 | 22.72  | 29.12  | 1.28  |
| BSU15290,ftsZ    | 1597832 | 1598980 | 126.08 | 99.30  | 0.79  |
| BSU15300,bpr     | 1599283 | 1603584 | 0.66   | 3.25   | 4.93  |
| BSU15310,spolIGA | 1603779 | 1604708 | 0.10   | 0.15   | 1.49  |
| BSU15320,sigE    | 1604771 | 1605490 | 0.17   | 0.32   | 1.83  |
| BSU15330,sigG    | 1605630 | 1606412 | 1.00   | 0.85   | 0.85  |
| BSU15340,ylmA    | 1606560 | 1607354 | 0.25   | 0.56   | 2.20  |
| BSU15350,ylmB    | 1607556 | 1608836 | 0.25   | 0.24   | 0.94  |
| BSU15360,ylmC    | 1608919 | 1609164 | 0.53   | 0.75   | 1.41  |
| BSU15370,ylmD    | 1609327 | 1610163 | 15.70  | 14.60  | 0.93  |
| BSU15380,ylmE    | 1610170 | 1610862 | 19.68  | 18.93  | 0.96  |
| BSU15390,sepF    | 1610865 | 1611314 | 37.52  | 36.00  | 0.96  |
| BSU15400,ylmG    | 1611321 | 1611593 | 39.55  | 38.46  | 0.97  |
| BSU15410,ylmH    | 1611654 | 1612427 | 20.73  | 28.18  | 1.36  |
| BSU15420,divIVA  | 1612521 | 1613015 | 75.26  | 81.51  | 1.08  |
| BSU15430,ileS    | 1613357 | 1616122 | 52.35  | 49.80  | 0.95  |
| BSU15440,ylyA    | 1616267 | 1616641 | 0.29   | 0.72   | 2.45  |
| BSU15450,lspA    | 1616744 | 1617208 | 5.94   | 4.10   | 0.69  |
| BSU15460,rluD    | 1617210 | 1618121 | 27.45  | 11.79  | 0.43  |
| BSU15470,pyrR    | 1618304 | 1618849 | 174.75 | 96.97  | 0.55  |
| BSU15480,pyrP    | 1619023 | 1620330 | 346.64 | 128.60 | 0.37  |
| BSU15490,pyrB    | 1620476 | 1621390 | 128.87 | 35.93  | 0.28  |
| BSU15500,pyrC    | 1621374 | 1622660 | 108.63 | 35.55  | 0.33  |
| BSU15510,pyrAA   | 1622657 | 1623751 | 109.77 | 41.40  | 0.38  |
| BSU15520,carB    | 1623736 | 1626951 | 104.40 | 59.60  | 0.57  |
| BSU15530,pyrK    | 1626948 | 1627718 | 84.12  | 50.38  | 0.60  |
| BSU15540,pyrD    | 1627718 | 1628653 | 77.96  | 36.94  | 0.47  |
| BSU15550,pyrF    | 1628622 | 1629341 | 81.64  | 40.31  | 0.49  |
| BSU15560,pyrE    | 1629320 | 1629970 | 92.77  | 50.60  | 0.55  |
| BSU15570,cysH    | 1630382 | 1631083 | 1.64   | 8.83   | 5.37  |
| BSU15580,cysP    | 1631095 | 1632159 | 1.03   | 6.96   | 6.73  |
| BSU15590,sat     | 1632208 | 1633356 | 1.20   | 15.18  | 12.65 |
| BSU15600,cysC    | 1633369 | 1633962 | 1.22   | 16.95  | 13.84 |
| BSU15610,sumT    | 1634061 | 1634834 | 1.86   | 20.19  | 10.85 |
| BSU15620,sirB    | 1634837 | 1635622 | 10.03  | 28.61  | 2.85  |
| BSU15630,sirC    | 1635603 | 1636091 | 14.54  | 37.36  | 2.57  |

|                |         |         |        |        |      |
|----------------|---------|---------|--------|--------|------|
| BSU15640,yloA  | 1636131 | 1637849 | 11.44  | 10.52  | 0.92 |
| BSU15650,yloB  | 1637965 | 1640637 | 0.32   | 0.22   | 0.68 |
| BSU15660,yloC  | 1640720 | 1641595 | 12.16  | 12.56  | 1.03 |
| BSU15670,ylzA  | 1641672 | 1641941 | 34.51  | 30.70  | 0.89 |
| BSU15680,gmk   | 1641949 | 1642563 | 34.27  | 28.07  | 0.82 |
| BSU15690,rpoZ  | 1642567 | 1642770 | 43.47  | 34.91  | 0.80 |
| BSU15700,coaBC | 1642851 | 1644071 | 3.05   | 4.80   | 1.57 |
| BSU15710,priA  | 1644068 | 1646485 | 3.07   | 6.20   | 2.02 |
| BSU15720,def   | 1646512 | 1646994 | 7.16   | 8.80   | 1.23 |
| BSU15730,fmt   | 1646999 | 1647952 | 14.49  | 18.28  | 1.26 |
| BSU15740,rsmB  | 1647939 | 1649282 | 14.88  | 19.24  | 1.29 |
| BSU15750,yloN  | 1649286 | 1650377 | 11.41  | 11.78  | 1.03 |
| BSU15760,prpC  | 1650384 | 1651148 | 4.49   | 6.77   | 1.51 |
| BSU15770,prkC  | 1651142 | 1653088 | 14.23  | 11.26  | 0.79 |
| BSU15780,yloQ  | 1653103 | 1653999 | 29.19  | 26.42  | 0.91 |
| BSU15790,rpe   | 1654004 | 1654657 | 28.11  | 24.86  | 0.88 |
| BSU15800,thiN  | 1654730 | 1655374 | 7.34   | 11.78  | 1.60 |
| BSU15810,spoVM | 1655446 | 1655526 | 9.25   | 15.43  | 1.67 |
| BSU15820,rpmB  | 1655599 | 1655787 | 497.79 | 396.95 | 0.80 |
| BSU15830,yloU  | 1656064 | 1656426 | 18.00  | 20.30  | 1.13 |
| BSU15840,yloV  | 1656442 | 1658103 | 38.70  | 32.89  | 0.85 |
| BSU15850,sdaAB | 1658242 | 1658904 | 4.04   | 6.38   | 1.58 |
| BSU15860,sdaAA | 1658930 | 1659832 | 8.34   | 9.00   | 1.08 |
| BSU15870,recG  | 1659810 | 1661858 | 2.45   | 3.34   | 1.36 |
| BSU15880,ylpC  | 1661967 | 1662533 | 15.16  | 12.68  | 0.84 |
| BSU15890,plsX  | 1662547 | 1663548 | 12.83  | 11.11  | 0.87 |
| BSU15900,fabD  | 1663567 | 1664520 | 23.12  | 16.75  | 0.72 |
| BSU15910,fabG  | 1664513 | 1665253 | 27.53  | 22.84  | 0.83 |
| BSU15920,acpP  | 1665337 | 1665570 | 89.33  | 68.10  | 0.76 |
| BSU15930,rnc   | 1665710 | 1666459 | 15.35  | 0.40   | 0.03 |
| BSU15940,smc   | 1666560 | 1670120 | 16.69  | 5.57   | 0.33 |
| BSU15950,ftsY  | 1670140 | 1671129 | 21.38  | 6.71   | 0.31 |
| BSU15960,ylqB  | 1671166 | 1671651 | 0.59   | 1.01   | 1.71 |
| BSU15970,ylxM  | 1671828 | 1672160 | 33.22  | 20.20  | 0.61 |
| BSU15980,ffh   | 1672174 | 1673514 | 45.85  | 27.46  | 0.60 |
| BSU15990,rpsP  | 1673620 | 1673892 | 226.24 | 149.51 | 0.66 |
| BSU16000,ylqC  | 1673892 | 1674137 | 180.97 | 114.08 | 0.63 |
| BSU16010,ylqD  | 1674259 | 1674645 | 2.56   | 2.88   | 1.12 |
| BSU16020,rimM  | 1674650 | 1675174 | 7.75   | 6.58   | 0.85 |
| BSU16030,trmD  | 1675171 | 1675902 | 9.40   | 6.81   | 0.72 |
| BSU16040,rplS  | 1676033 | 1676389 | 451.86 | 216.80 | 0.48 |
| BSU16050,rbgA  | 1676532 | 1677380 | 13.17  | 7.77   | 0.59 |
| BSU16060,rnhB  | 1677451 | 1678218 | 1.34   | 1.52   | 1.13 |
| BSU16070,ylqG  | 1678250 | 1679980 | 1.93   | 1.98   | 1.03 |
| BSU16080,ylqH  | 1679977 | 1680258 | 1.29   | 1.36   | 1.05 |
| BSU16090,sucC  | 1680431 | 1681588 | 7.25   | 15.22  | 2.10 |
| BSU16100,sucD  | 1681617 | 1682519 | 14.24  | 23.37  | 1.64 |

|               |         |         |        |        |       |
|---------------|---------|---------|--------|--------|-------|
| BSU16110,dprA | 1682580 | 1683473 | 0.37   | 1.05   | 2.81  |
| BSU16120,topA | 1683661 | 1685736 | 20.89  | 11.13  | 0.53  |
| BSU16130,gid  | 1685812 | 1687119 | 9.50   | 3.99   | 0.42  |
| BSU16140,xerC | 1687187 | 1688101 | 14.99  | 8.65   | 0.58  |
| BSU16150,clpQ | 1688114 | 1688659 | 30.09  | 26.38  | 0.88  |
| BSU16160,hslU | 1688676 | 1690079 | 28.97  | 26.06  | 0.90  |
| BSU16170,codY | 1690119 | 1690898 | 37.48  | 32.10  | 0.86  |
| BSU16180,flgB | 1691278 | 1691667 | 0.93   | 11.07  | 11.97 |
| BSU16190,flgC | 1691667 | 1692119 | 0.71   | 11.08  | 15.69 |
| BSU16200,fliE | 1692130 | 1692450 | 0.29   | 8.31   | 28.39 |
| BSU16210,fliF | 1692496 | 1694106 | 0.34   | 16.11  | 47.40 |
| BSU16220,fliG | 1694119 | 1695135 | 0.16   | 5.56   | 34.86 |
| BSU16230,fliH | 1695254 | 1695880 | 0.18   | 6.06   | 33.11 |
| BSU16240,fliI | 1695877 | 1697193 | 0.14   | 5.73   | 40.96 |
| BSU16250,fliJ | 1697196 | 1697639 | 0.12   | 5.78   | 49.33 |
| BSU16260,ylxF | 1697651 | 1698265 | 0.14   | 6.31   | 44.26 |
| BSU16270,fliK | 1698278 | 1699741 | 0.14   | 6.00   | 43.00 |
| BSU16280,flgD | 1699738 | 1700160 | 0.15   | 5.19   | 34.03 |
| BSU16290,flgG | 1700182 | 1700976 | 0.27   | 5.32   | 20.03 |
| BSU16299,ylzI | 1701016 | 1701231 | 0.15   | 2.94   | 20.05 |
| BSU16300,fliL | 1701228 | 1701650 | 0.17   | 3.48   | 20.69 |
| BSU16310,fliM | 1701684 | 1702682 | 0.24   | 4.62   | 19.58 |
| BSU16320,fliY | 1702672 | 1703808 | 0.32   | 5.53   | 17.44 |
| BSU16330,cheY | 1703834 | 1704196 | 0.68   | 11.45  | 16.84 |
| BSU16340,fliZ | 1704211 | 1704870 | 0.31   | 5.67   | 18.14 |
| BSU16350,fliP | 1704863 | 1705528 | 0.19   | 3.60   | 19.07 |
| BSU16360,fliQ | 1705543 | 1705812 | 0.27   | 5.38   | 19.81 |
| BSU16370,fliR | 1705820 | 1706599 | 0.25   | 4.80   | 19.10 |
| BSU16380,flhB | 1706599 | 1707681 | 0.23   | 4.09   | 17.99 |
| BSU16390,flhA | 1707714 | 1709747 | 0.29   | 4.06   | 14.15 |
| BSU16400,flhF | 1709747 | 1710847 | 0.31   | 3.62   | 11.58 |
| BSU16410,ylxH | 1710838 | 1711734 | 0.37   | 3.63   | 9.84  |
| BSU16420,cheB | 1711736 | 1712809 | 0.24   | 3.40   | 14.11 |
| BSU16430,cheA | 1712815 | 1714833 | 0.31   | 4.09   | 13.36 |
| BSU16440,cheW | 1714855 | 1715325 | 0.53   | 5.75   | 10.76 |
| BSU16450,cheC | 1715344 | 1715973 | 0.71   | 7.52   | 10.53 |
| BSU16460,cheD | 1715970 | 1716470 | 0.69   | 5.96   | 8.68  |
| BSU16470,sigD | 1716493 | 1717257 | 0.86   | 6.06   | 7.04  |
| BSU16480,ylxL | 1717286 | 1717789 | 1.17   | 7.89   | 6.74  |
| BSU16490,rpsB | 1717933 | 1718673 | 141.08 | 68.05  | 0.48  |
| BSU16500,tsf  | 1718775 | 1719656 | 215.83 | 101.52 | 0.47  |
| BSU16510,pyrH | 1719802 | 1720524 | 39.08  | 24.57  | 0.63  |
| BSU16520,frf  | 1720526 | 1721083 | 47.36  | 26.43  | 0.56  |
| BSU16530,uppS | 1721214 | 1721996 | 8.07   | 8.05   | 1.00  |
| BSU16540,cdsA | 1722000 | 1722809 | 7.93   | 7.24   | 0.91  |
| BSU16550,dxr  | 1722871 | 1724022 | 14.64  | 9.55   | 0.65  |
| BSU16560,rseP | 1724029 | 1725297 | 45.85  | 27.96  | 0.61  |



|                  |         |         |        |        |      |
|------------------|---------|---------|--------|--------|------|
| BSU16570,proS    | 1725330 | 1727024 | 82.48  | 43.50  | 0.53 |
| BSU16580,polC    | 1727133 | 1731446 | 17.01  | 8.12   | 0.48 |
| BSU16590,ylxS    | 1731776 | 1732246 | 12.44  | 5.29   | 0.43 |
| BSU16600,nusA    | 1732281 | 1733396 | 18.29  | 9.39   | 0.51 |
| BSU16610,ylxR    | 1733410 | 1733685 | 24.50  | 12.00  | 0.49 |
| BSU16620,ylxQ    | 1733687 | 1733989 | 25.81  | 13.16  | 0.51 |
| BSU16630,infB    | 1734009 | 1736159 | 34.88  | 19.25  | 0.55 |
| BSU16640,ylxP    | 1736156 | 1736434 | 54.04  | 33.35  | 0.62 |
| BSU16650,rbfA    | 1736451 | 1736804 | 39.94  | 25.54  | 0.64 |
| BSU16660,truB    | 1736886 | 1737815 | 0.97   | 0.99   | 1.02 |
| BSU16670,ribC    | 1737834 | 1738784 | 9.83   | 6.68   | 0.68 |
| BSU16680,rpsO    | 1738941 | 1739210 | 403.66 | 241.67 | 0.60 |
| BSU16690,pnpA    | 1739383 | 1741500 | 96.84  | 72.51  | 0.75 |
| BSU16700,ylxY    | 1741618 | 1742577 | 2.98   | 5.96   | 2.00 |
| BSU16710,mlpA    | 1742617 | 1743846 | 6.13   | 10.46  | 1.71 |
| BSU16720,ymxH    | 1743924 | 1744181 | 1.21   | 5.56   | 4.58 |
| BSU16730,spoVFA  | 1744367 | 1745260 | 0.19   | 0.16   | 0.85 |
| BSU16740,spoVFB  | 1745263 | 1745865 | 0.25   | 0.26   | 1.06 |
| BSU16750,asd     | 1745991 | 1747031 | 23.68  | 46.08  | 1.95 |
| BSU16760,dapG    | 1747123 | 1748337 | 21.19  | 19.62  | 0.93 |
| BSU16770,dapA    | 1748368 | 1749240 | 34.03  | 32.92  | 0.97 |
| BSU16780,rnjB    | 1749418 | 1751085 | 92.91  | 68.56  | 0.74 |
| BSU16790,tepA    | 1751201 | 1751938 | 1.24   | 1.67   | 1.35 |
| BSU16799,ylzJ    | 1751935 | 1752147 | 1.66   | 2.19   | 1.32 |
| BSU16800,spolIIE | 1752272 | 1754641 | 13.03  | 11.56  | 0.89 |
| BSU16810,ymfC    | 1754785 | 1755510 | 4.55   | 12.07  | 2.66 |
| BSU16825,ymfD    | 1755649 | 1756857 | 0.91   | 3.21   | 3.53 |
| BSU16845,ymfF    | 1757037 | 1758317 | 17.00  | 16.56  | 0.97 |
| BSU16860,ymfH    | 1758314 | 1759600 | 21.73  | 20.87  | 0.96 |
| BSU16870,fabG    | 1759655 | 1760383 | 1.40   | 2.21   | 1.58 |
| BSU16880,ymfJ    | 1760464 | 1760721 | 3.81   | 7.42   | 1.95 |
| BSU16910,ymfM    | 1761707 | 1762573 | 15.50  | 15.89  | 1.03 |
| BSU16920,pgsA    | 1762623 | 1763204 | 20.15  | 9.26   | 0.46 |
| BSU16930,cinA    | 1763222 | 1764472 | 32.95  | 17.14  | 0.52 |
| BSU16940,recA    | 1764645 | 1765691 | 45.04  | 27.10  | 0.60 |
| BSU16950,pbpX    | 1765859 | 1767034 | 1.80   | 0.85   | 0.48 |
| BSU16960,ymdA    | 1767310 | 1768872 | 404.62 | 493.46 | 1.22 |
| BSU16970,ymdB    | 1768941 | 1769735 | 8.36   | 5.57   | 0.67 |
| BSU16980,spoVS   | 1769935 | 1770195 | 10.94  | 9.49   | 0.87 |
| BSU16990,tdh     | 1770461 | 1771504 | 4.72   | 3.02   | 0.64 |
| BSU17000,kbl     | 1771517 | 1772695 | 22.35  | 6.57   | 0.29 |
| BSU17010,ymcB    | 1772843 | 1774372 | 14.05  | 7.77   | 0.55 |
| BSU17020,ymcA    | 1774374 | 1774805 | 20.06  | 13.37  | 0.67 |
| BSU17030,cotE    | 1775067 | 1775612 | 0.29   | 0.21   | 0.71 |
| BSU17040,mutS    | 1775745 | 1778321 | 16.67  | 7.73   | 0.46 |
| BSU17050,mutL    | 1778337 | 1780220 | 22.48  | 12.03  | 0.54 |
| BSU17060,ymzD    | 1780618 | 1781073 | 2.69   | 3.03   | 1.13 |

|                |         |         |        |       |       |
|----------------|---------|---------|--------|-------|-------|
| BSU17070,ymcC  | 1781228 | 1781785 | 0.84   | 0.75  | 0.90  |
| BSU17080,pkA   | 1781906 | 1782523 | 7.46   | 5.71  | 0.76  |
| BSU17090,pkB   | 1782713 | 1783390 | 0.53   | 1.41  | 2.64  |
| BSU17100,pkC   | 1783763 | 1784629 | 2.14   | 4.64  | 2.16  |
| BSU17110,pkD   | 1785133 | 1786107 | 0.47   | 3.21  | 6.87  |
| BSU17120,pkE   | 1786104 | 1788407 | 0.11   | 1.47  | 13.79 |
| BSU17130,acpK  | 1788469 | 1788717 | 0.08   | 1.22  | 14.56 |
| BSU17140,pkF   | 1788695 | 1789942 | 0.05   | 0.66  | 14.42 |
| BSU17150,pkG   | 1789943 | 1791205 | 0.07   | 0.56  | 7.94  |
| BSU17160,pkH   | 1791193 | 1791972 | 0.05   | 0.53  | 10.23 |
| BSU17170,pkI   | 1792012 | 1792761 | 0.07   | 0.43  | 5.89  |
| BSU17180,pkJ   | 1792806 | 1807937 | 0.13   | 0.61  | 4.74  |
| BSU17190,pkL   | 1807921 | 1821537 | 0.18   | 0.42  | 2.30  |
| BSU17200,pkM   | 1821553 | 1834341 | 0.35   | 0.52  | 1.48  |
| BSU17210,pkN   | 1834409 | 1850875 | 0.20   | 0.51  | 2.57  |
| BSU17220,pkR   | 1850890 | 1858521 | 0.65   | 1.12  | 1.72  |
| BSU17230,pkS   | 1858566 | 1859783 | 4.08   | 5.61  | 1.37  |
| BSU17240,ymzB  | 1860014 | 1860370 | 0.60   | 1.19  | 1.97  |
| BSU17250,ymaE  | 1860449 | 1861273 | 0.27   | 0.86  | 3.22  |
| BSU17260,aprX  | 1861384 | 1862712 | 0.16   | 0.20  | 1.22  |
| BSU17270,ymaC  | 1863448 | 1864155 | 0.30   | 0.43  | 1.45  |
| BSU17280,ymaD  | 1864225 | 1864677 | 2.91   | 3.98  | 1.37  |
| BSU17290,ebrB  | 1864691 | 1865044 | 2.85   | 2.11  | 0.74  |
| BSU17300,ebrA  | 1865058 | 1865375 | 1.80   | 1.36  | 0.75  |
| BSU17310,ymaG  | 1865512 | 1865787 | 0.13   | 0.14  | 1.08  |
| BSU17320,ymaF  | 1865876 | 1866289 | 0.13   | 0.12  | 0.97  |
| BSU17330,miaA  | 1866389 | 1867333 | 6.64   | 5.81  | 0.87  |
| BSU17340,hfq   | 1867373 | 1867594 | 12.47  | 28.19 | 2.26  |
| BSU17350,ymzC  | 1867790 | 1868062 | 0.97   | 1.13  | 1.17  |
| BSU17360,ymzA  | 1868144 | 1868374 | 4.15   | 4.79  | 1.15  |
| BSU17370,nrdI  | 1868617 | 1869009 | 6.31   | 4.99  | 0.79  |
| BSU17380,nrdE  | 1868969 | 1871071 | 21.82  | 11.70 | 0.54  |
| BSU17390,nrdF  | 1871089 | 1872078 | 23.29  | 12.83 | 0.55  |
| BSU17400,ymaB  | 1872128 | 1872748 | 4.08   | 3.93  | 0.96  |
| BSU17410,cwlC  | 1872812 | 1873579 | 1.42   | 1.12  | 0.79  |
| BSU17420,spoVK | 1874203 | 1875171 | 0.21   | 0.42  | 1.97  |
| BSU17430,ynbA  | 1875304 | 1876566 | 4.73   | 3.86  | 0.82  |
| BSU17440,ynbB  | 1876584 | 1877849 | 5.67   | 3.80  | 0.67  |
| BSU17450,glnR  | 1877959 | 1878366 | 36.29  | 21.72 | 0.60  |
| BSU17460,glnA  | 1878425 | 1879759 | 130.06 | 82.86 | 0.64  |
| BSU17470,ynxB  | 1880087 | 1880377 | 0.40   | 1.30  | 3.27  |
| BSU17480,ynzF  | 1880623 | 1880967 | 1.42   | 2.23  | 1.57  |
| BSU17490,ynzG  | 1881098 | 1881349 | 0.46   | 1.23  | 2.66  |
| BSU17500,ynaB  | 1881536 | 1881970 | 2.70   | 5.12  | 1.90  |
| BSU17510,ynaC  | 1882040 | 1882831 | 1.77   | 2.79  | 1.58  |
| BSU17520,ynaD  | 1883166 | 1883678 | 0.17   | 0.50  | 2.97  |
| BSU17530,ynaE  | 1884238 | 1884879 | 1.33   | 3.43  | 2.58  |

|                |         |         |       |       |      |
|----------------|---------|---------|-------|-------|------|
| BSU17540,ynaF  | 1884968 | 1885321 | 1.16  | 3.45  | 2.97 |
| BSU17550,ynaG  | 1885365 | 1885640 | 0.92  | 2.86  | 3.12 |
| BSU17559,ynzI  | 1885753 | 1885917 | 0.91  | 2.33  | 2.55 |
| BSU17560,ynal  | 1886057 | 1886527 | 0.39  | 0.99  | 2.53 |
| BSU17570,xynP  | 1887352 | 1888743 | 0.32  | 0.16  | 0.50 |
| BSU17580,xynB  | 1888774 | 1890375 | 0.70  | 0.59  | 0.83 |
| BSU17590,xylR  | 1890512 | 1891564 | 0.98  | 1.31  | 1.33 |
| BSU17600,xylA  | 1891908 | 1893245 | 4.91  | 1.71  | 0.35 |
| BSU17610,xylB  | 1893396 | 1894895 | 1.06  | 0.48  | 0.45 |
| BSU17620,yncB  | 1895378 | 1896013 | 2.09  | 1.34  | 0.64 |
| BSU17630,yncC  | 1896424 | 1897839 | 1.90  | 1.04  | 0.55 |
| BSU17640,alrB  | 1897941 | 1899125 | 0.21  | 0.16  | 0.76 |
| BSU17650,yncE  | 1899589 | 1900050 | 0.55  | 1.10  | 2.02 |
| BSU17660,yncF  | 1900080 | 1900514 | 4.29  | 5.35  | 1.25 |
| BSU17670,cotU  | 1901117 | 1901377 | 0.79  | 3.37  | 4.27 |
| BSU17680,thyA  | 1902219 | 1903058 | 2.71  | 3.48  | 1.28 |
| BSU17690,yncM  | 1903511 | 1904263 | 2.61  | 6.25  | 2.39 |
| BSU17699,ynzK  | 1904393 | 1904749 | 0.14  | 0.12  | 0.82 |
| BSU17700,cotC  | 1904995 | 1905195 | 1.06  | 1.50  | 1.42 |
| BSU17710,tatAC | 1905370 | 1905558 | 10.78 | 21.33 | 1.98 |
| BSU17720,yndA  | 1905809 | 1906207 | 0.16  | 0.45  | 2.82 |
| BSU17730,yndB  | 1906272 | 1906706 | 35.83 | 40.23 | 1.12 |
| BSU17740,ynzB  | 1907013 | 1907201 | 2.62  | 3.12  | 1.19 |
| BSU17750,yndD  | 1907494 | 1909056 | 0.23  | 0.15  | 0.64 |
| BSU17760,yndE  | 1909086 | 1910177 | 0.16  | 0.12  | 0.73 |
| BSU17770,yndF  | 1910167 | 1911381 | 0.08  | 0.08  | 0.94 |
| BSU17780,yndG  | 1911528 | 1912334 | 0.59  | 0.38  | 0.65 |
| BSU17790,yndH  | 1912339 | 1912956 | 1.28  | 0.69  | 0.54 |
| BSU17800,yndJ  | 1912953 | 1914593 | 2.64  | 1.17  | 0.44 |
| BSU17810,yndK  | 1914630 | 1914995 | 1.44  | 0.55  | 0.38 |
| BSU17820,yndL  | 1915221 | 1915979 | 0.10  | 0.16  | 1.68 |
| BSU17830,yndM  | 1916006 | 1916545 | 0.60  | 1.16  | 1.92 |
| BSU17840,yndN  | 1916663 | 1917097 | 1.37  | 0.60  | 0.44 |
| BSU17850,lexA  | 1917639 | 1918256 | 34.40 | 28.96 | 0.84 |
| BSU17860,yneA  | 1918406 | 1918723 | 0.30  | 0.38  | 1.27 |
| BSU17870,yneB  | 1918742 | 1919395 | 0.39  | 0.51  | 1.31 |
| BSU17880,ynzC  | 1919459 | 1919692 | 6.60  | 6.57  | 1.00 |
| BSU17890,tkf   | 1919861 | 1921864 | 49.98 | 43.17 | 0.86 |
| BSU17900,yneE  | 1922017 | 1922463 | 0.74  | 3.05  | 4.11 |
| BSU17910,yneF  | 1922549 | 1922767 | 46.49 | 41.00 | 0.88 |
| BSU17920,ynzD  | 1922841 | 1923014 | 6.22  | 6.85  | 1.10 |
| BSU17930,ccdA  | 1923234 | 1923941 | 0.74  | 0.48  | 0.65 |
| BSU17940,yneI  | 1924030 | 1924392 | 5.16  | 4.92  | 0.95 |
| BSU17950,yneJ  | 1924471 | 1924962 | 33.44 | 25.77 | 0.77 |
| BSU17960,yneK  | 1924993 | 1925421 | 11.09 | 5.35  | 0.48 |
| BSU17970,cotM  | 1925655 | 1926047 | 0.27  | 0.19  | 0.70 |
| BSU17980,sspP  | 1926128 | 1926274 | 0.34  | 0.44  | 1.29 |

|                |         |         |       |       |       |
|----------------|---------|---------|-------|-------|-------|
| BSU17990,sspO  | 1926306 | 1926452 | 0.55  | 0.50  | 0.91  |
| BSU18000,citB  | 1926680 | 1929409 | 6.89  | 10.71 | 1.56  |
| BSU18010,yneN  | 1929481 | 1929993 | 0.80  | 2.11  | 2.64  |
| BSU18019,ynzL  | 1930074 | 1930199 | 0.00  | 0.00  | 0.00  |
| BSU18020,sspN  | 1930264 | 1930410 | 0.12  | 0.59  | 4.95  |
| BSU18030,tlp   | 1930447 | 1930698 | 0.11  | 0.53  | 4.94  |
| BSU18040,yneP  | 1930834 | 1931199 | 3.62  | 3.95  | 1.09  |
| BSU18050,yneQ  | 1931215 | 1931514 | 3.88  | 3.93  | 1.01  |
| BSU18060,yneR  | 1931545 | 1931832 | 42.65 | 40.35 | 0.95  |
| BSU18070,yneS  | 1931920 | 1932501 | 12.59 | 13.91 | 1.11  |
| BSU18080,yneT  | 1932671 | 1933078 | 19.24 | 39.11 | 2.03  |
| BSU18090,parE  | 1933477 | 1935444 | 9.95  | 6.84  | 0.69  |
| BSU18100,parC  | 1935448 | 1937868 | 17.21 | 11.64 | 0.68  |
| BSU18110,ynfC  | 1938066 | 1938476 | 1.46  | 6.59  | 4.51  |
| BSU18120,alsT  | 1938925 | 1940322 | 14.47 | 4.03  | 0.28  |
| BSU18130,eglS  | 1940625 | 1942124 | 0.56  | 0.42  | 0.76  |
| BSU18140,ynfE  | 1942192 | 1942455 | 0.07  | 0.13  | 1.89  |
| BSU18150,xynC  | 1942714 | 1943982 | 3.01  | 1.42  | 0.47  |
| BSU18160,xynD  | 1944113 | 1945654 | 2.34  | 0.96  | 0.41  |
| BSU18170,yngA  | 1946249 | 1946695 | 0.20  | 0.35  | 1.73  |
| BSU18180,yngB  | 1946702 | 1947595 | 1.10  | 1.04  | 0.94  |
| BSU18190,yngC  | 1947668 | 1948264 | 7.81  | 4.59  | 0.59  |
| BSU18200,yngD  | 1948313 | 1949512 | 0.90  | 0.60  | 0.67  |
| BSU18210,yngE  | 1949682 | 1951217 | 0.23  | 0.16  | 0.69  |
| BSU18220,yngF  | 1951228 | 1952010 | 0.11  | 0.09  | 0.84  |
| BSU18230,yngG  | 1952031 | 1952930 | 0.08  | 0.06  | 0.85  |
| BSU18239,yngHB | 1952945 | 1953166 | 0.00  | 0.00  | 0.00  |
| BSU18240,yngH  | 1953181 | 1954515 | 0.05  | 0.05  | 1.10  |
| BSU18250,yngI  | 1954525 | 1956174 | 0.07  | 0.06  | 0.89  |
| BSU18260,yngJ  | 1956218 | 1957360 | 0.06  | 0.05  | 0.81  |
| BSU18270,ynzE  | 1957451 | 1957756 | 0.09  | 0.12  | 1.30  |
| BSU18280,yngK  | 1958027 | 1959559 | 0.13  | 0.13  | 0.94  |
| BSU18290,yngL  | 1959695 | 1960087 | 0.09  | 0.16  | 1.84  |
| BSU18300,ppsE  | 1960198 | 1964037 | 0.31  | 1.78  | 5.82  |
| BSU18310,ppsD  | 1964045 | 1974856 | 0.36  | 3.12  | 8.65  |
| BSU18320,ppsC  | 1974881 | 1982548 | 0.16  | 2.31  | 14.84 |
| BSU18330,ppsB  | 1982565 | 1990247 | 0.00  | 0.00  | 0.00  |
| BSU18340,ppsA  | 1990272 | 1997957 | 0.00  | 0.00  | 0.00  |
| BSU18350,dacC  | 1998340 | 1999815 | 0.76  | 2.46  | 3.25  |
| BSU18360,yoxA  | 1999849 | 2000826 | 0.74  | 2.44  | 3.32  |
| BSU18370,yoeA  | 2000960 | 2002351 | 3.94  | 4.28  | 1.09  |
| BSU18380,iseA  | 2002637 | 2003182 | 31.30 | 27.50 | 0.88  |
| BSU18390,yoeC  | 2003401 | 2003946 | 1.11  | 1.70  | 1.53  |
| BSU18400,yoeD  | 2004262 | 2004492 | 2.65  | 2.17  | 0.82  |
| BSU18410,ggT   | 2004677 | 2006440 | 0.30  | 0.20  | 0.67  |
| BSU18420,ftsR  | 2006541 | 2007398 | 3.40  | 2.08  | 0.61  |
| BSU18430,yogA  | 2007526 | 2008515 | 0.48  | 0.38  | 0.78  |

|               |         |         |       |       |       |
|---------------|---------|---------|-------|-------|-------|
| BSU18440,gltd | 2008572 | 2010053 | 1.50  | 29.57 | 19.65 |
| BSU18450,glta | 2010070 | 2014632 | 1.59  | 23.83 | 15.01 |
| BSU18460,gltc | 2014779 | 2015681 | 4.67  | 5.48  | 1.17  |
| BSU18470,proj | 2015733 | 2016848 | 1.78  | 1.40  | 0.79  |
| BSU18480,proh | 2016845 | 2017738 | 1.00  | 0.95  | 0.95  |
| BSU18490,rtp  | 2017886 | 2018254 | 0.72  | 1.95  | 2.70  |
| BSU18500,fabG | 2018554 | 2019270 | 10.90 | 8.13  | 0.75  |
| BSU18510,yoxC | 2019421 | 2019726 | 0.18  | 0.58  | 3.18  |
| BSU18520,yoxB | 2019797 | 2020567 | 0.06  | 0.12  | 1.80  |
| BSU18530,yoaA | 2020611 | 2021144 | 1.23  | 2.17  | 1.76  |
| BSU18540,yoaB | 2021223 | 2022467 | 0.11  | 0.60  | 5.21  |
| BSU18550,yoaC | 2022561 | 2024024 | 0.06  | 0.39  | 6.67  |
| BSU18560,yoaD | 2024042 | 2025076 | 0.06  | 0.97  | 16.77 |
| BSU18570,yoaE | 2025400 | 2027442 | 0.55  | 4.47  | 8.08  |
| BSU18580,yoaF | 2027509 | 2027802 | 2.57  | 6.65  | 2.59  |
| BSU18590,yoaG | 2028175 | 2028579 | 0.90  | 0.92  | 1.02  |
| BSU18600,yozQ | 2029020 | 2029313 | 0.43  | 0.97  | 2.26  |
| BSU18610,yoaH | 2029429 | 2031114 | 0.16  | 0.29  | 1.80  |
| BSU18620,yoaI | 2031439 | 2032890 | 0.15  | 0.24  | 1.52  |
| BSU18630,exlX | 2032927 | 2033625 | 4.27  | 2.72  | 0.64  |
| BSU18640,yoaK | 2033895 | 2034572 | 4.76  | 2.99  | 0.63  |
| BSU18650,peIB | 2034745 | 2035782 | 2.45  | 1.43  | 0.58  |
| BSU18660,yoaM | 2036039 | 2036722 | 3.17  | 1.61  | 0.51  |
| BSU18669,yozS | 2037063 | 2037368 | 1.98  | 2.25  | 1.13  |
| BSU18670,yoaN | 2037601 | 2038779 | 0.09  | 0.07  | 0.79  |
| BSU18680,yoaO | 2038902 | 2039390 | 0.06  | 0.09  | 1.58  |
| BSU18690,yoaP | 2039610 | 2040365 | 0.06  | 0.09  | 1.45  |
| BSU18700,yoaQ | 2040673 | 2041029 | 0.15  | 0.16  | 1.07  |
| BSU18709,yozT | 2040988 | 2041227 | 0.16  | 0.16  | 1.00  |
| BSU18710,yozF | 2041330 | 2041827 | 0.13  | 0.13  | 1.03  |
| BSU18720,yoaR | 2041928 | 2042839 | 0.25  | 0.28  | 1.15  |
| BSU18730,yoaS | 2043186 | 2043668 | 0.70  | 0.73  | 1.05  |
| BSU18740,yozG | 2043678 | 2043932 | 1.20  | 1.18  | 0.98  |
| BSU18750,yoaT | 2044038 | 2044832 | 1.10  | 1.04  | 0.95  |
| BSU18760,yoaU | 2044956 | 2045828 | 0.26  | 0.37  | 1.40  |
| BSU18770,cyeA | 2045929 | 2046807 | 0.40  | 0.27  | 0.66  |
| BSU18780,yoaW | 2046980 | 2047411 | 2.45  | 1.54  | 0.63  |
| BSU18790,yoaZ | 2047675 | 2048307 | 0.53  | 0.94  | 1.80  |
| BSU18800,penP | 2048533 | 2049453 | 9.31  | 9.17  | 0.99  |
| BSU18810,yobA | 2049950 | 2050312 | 0.23  | 0.39  | 1.71  |
| BSU18820,yobB | 2050689 | 2050952 | 1.32  | 0.53  | 0.41  |
| BSU18830,pps  | 2051329 | 2053929 | 0.75  | 0.35  | 0.47  |
| BSU18840,xynA | 2054599 | 2055240 | 3.97  | 2.94  | 0.74  |
| BSU18849,yozV | 2055868 | 2056107 | 0.35  | 2.14  | 6.16  |
| BSU18850,yobD | 2056278 | 2056616 | 0.34  | 2.27  | 6.62  |
| BSU18860,yozH | 2056650 | 2057006 | 1.36  | 4.11  | 3.02  |
| BSU18870,yozI | 2057214 | 2057579 | 2.30  | 6.22  | 2.70  |

|               |         |         |       |       |      |
|---------------|---------|---------|-------|-------|------|
| BSU18880,yobE | 2057801 | 2058460 | 17.14 | 25.10 | 1.46 |
| BSU18890,yobF | 2058715 | 2059638 | 5.18  | 7.40  | 1.43 |
| BSU18898,yozW | 2059691 | 2059864 | 0.40  | 1.04  | 2.63 |
| BSU18899,yozX | 2060009 | 2060233 | 0.13  | 0.42  | 3.18 |
| BSU18900,yozJ | 2060237 | 2060692 | 0.13  | 0.43  | 3.31 |
| BSU18908,yozY | 2060817 | 2061077 | 4.37  | 6.09  | 1.39 |
| BSU18910,rapK | 2062150 | 2063265 | 0.37  | 1.41  | 3.83 |
| BSU18920,phrK | 2063262 | 2063384 | 1.72  | 6.38  | 3.70 |
| BSU18930,yobH | 2063510 | 2064163 | 0.04  | 0.13  | 3.55 |
| BSU18940,yozK | 2064200 | 2064547 | 0.01  | 0.07  | 5.60 |
| BSU18950,yozL | 2064540 | 2064833 | 0.04  | 0.07  | 2.02 |
| BSU18960,yozM | 2065042 | 2065377 | 0.07  | 0.36  | 4.98 |
| BSU18970,yobl | 2065424 | 2069029 | 1.18  | 3.71  | 3.14 |
| BSU18980,yobJ | 2070244 | 2071086 | 2.50  | 2.68  | 1.07 |
| BSU18990,yobK | 2071286 | 2071744 | 3.88  | 5.69  | 1.47 |
| BSU19000,yobL | 2071754 | 2073556 | 1.17  | 1.47  | 1.26 |
| BSU19010,yobM | 2073658 | 2074221 | 1.72  | 2.50  | 1.45 |
| BSU19020,yobN | 2074439 | 2075779 | 0.21  | 0.22  | 1.05 |
| BSU19030,yobO | 2076206 | 2078626 | 0.20  | 0.44  | 2.23 |
| BSU19040,csaA | 2079214 | 2079546 | 5.11  | 5.52  | 1.08 |
| BSU19050,yobQ | 2079611 | 2080336 | 0.90  | 1.01  | 1.12 |
| BSU19060,yobR | 2080351 | 2081094 | 0.40  | 0.64  | 1.61 |
| BSU19070,yobS | 2081172 | 2081747 | 0.40  | 0.46  | 1.14 |
| BSU19080,yobT | 2081753 | 2082454 | 0.60  | 0.70  | 1.17 |
| BSU19090,yobU | 2082531 | 2083013 | 0.19  | 0.88  | 4.53 |
| BSU19100,yobV | 2083067 | 2084008 | 0.75  | 0.52  | 0.69 |
| BSU19110,yobW | 2084214 | 2084759 | 0.16  | 0.14  | 0.91 |
| BSU19120,czrA | 2084786 | 2085109 | 3.72  | 4.18  | 1.12 |
| BSU19130,yocA | 2085303 | 2085980 | 5.13  | 5.28  | 1.03 |
| BSU19140,yozB | 2086070 | 2086606 | 9.70  | 7.44  | 0.77 |
| BSU19150,yocB | 2086743 | 2087525 | 0.38  | 0.94  | 2.44 |
| BSU19160,yocC | 2087696 | 2088193 | 1.29  | 1.08  | 0.83 |
| BSU19170,yocD | 2088257 | 2089234 | 7.79  | 7.83  | 1.00 |
| BSU19180,des  | 2089396 | 2090454 | 5.44  | 1.33  | 0.24 |
| BSU19190,desK | 2090574 | 2091686 | 1.27  | 1.47  | 1.16 |
| BSU19200,desR | 2091705 | 2092304 | 1.46  | 2.04  | 1.39 |
| BSU19210,yocH | 2092899 | 2093762 | 30.54 | 15.68 | 0.51 |
| BSU19220,yocl | 2094010 | 2095785 | 5.58  | 3.75  | 0.67 |
| BSU19230,yocJ | 2096350 | 2096976 | 0.91  | 1.12  | 1.23 |
| BSU19240,yocK | 2097126 | 2097617 | 1.51  | 1.27  | 0.84 |
| BSU19250,yocL | 2097692 | 2098024 | 1.20  | 1.06  | 0.89 |
| BSU19259,yoyB | 2098102 | 2098329 | 1.17  | 0.95  | 0.81 |
| BSU19260,yocM | 2098316 | 2098792 | 0.90  | 0.68  | 0.75 |
| BSU19270,yozN | 2098859 | 2099122 | 1.30  | 1.54  | 1.19 |
| BSU19280,yocN | 2099127 | 2099360 | 1.03  | 1.27  | 1.23 |
| BSU19290,yozO | 2099446 | 2099790 | 5.59  | 5.78  | 1.03 |
| BSU19300,yozC | 2100147 | 2100350 | 5.80  | 9.47  | 1.63 |

|                |         |         |        |        |       |
|----------------|---------|---------|--------|--------|-------|
| BSU19310,dhaS  | 2100580 | 2102067 | 31.11  | 15.15  | 0.49  |
| BSU19320,sqhC  | 2102168 | 2104066 | 0.32   | 0.27   | 0.82  |
| BSU19330,sodF  | 2104056 | 2104901 | 0.34   | 0.55   | 1.62  |
| BSU19340,yocR  | 2104934 | 2106271 | 10.70  | 18.86  | 1.76  |
| BSU19350,yocS  | 2106490 | 2107455 | 0.56   | 1.01   | 1.80  |
| BSU19360,odhB  | 2107505 | 2108758 | 121.39 | 147.84 | 1.22  |
| BSU19370,sucA  | 2108774 | 2111608 | 84.06  | 88.51  | 1.05  |
| BSU19380,yojO  | 2111837 | 2113753 | 8.77   | 4.07   | 0.46  |
| BSU19390,yojN  | 2113764 | 2114678 | 4.67   | 2.26   | 0.48  |
| BSU19400,sodC  | 2114742 | 2115332 | 0.14   | 0.57   | 3.98  |
| BSU19410,cwlS  | 2115425 | 2116669 | 0.46   | 1.96   | 4.30  |
| BSU19420,yojK  | 2117051 | 2118268 | 0.64   | 0.84   | 1.32  |
| BSU19430,yojJ  | 2118504 | 2119127 | 0.09   | 0.10   | 1.10  |
| BSU19440,yojI  | 2119393 | 2120751 | 3.81   | 2.86   | 0.75  |
| BSU19450,rsbRC | 2120767 | 2121615 | 6.01   | 4.77   | 0.79  |
| BSU19460,yojG  | 2121641 | 2122306 | 5.54   | 7.15   | 1.29  |
| BSU19470,yojF  | 2122325 | 2122675 | 5.71   | 6.85   | 1.20  |
| BSU19479,yoyC  | 2122672 | 2122950 | 3.11   | 3.64   | 1.17  |
| BSU19480,yojE  | 2123026 | 2123922 | 1.30   | 1.77   | 1.36  |
| BSU19490,gerT  | 2124021 | 2124494 | 0.05   | 0.07   | 1.36  |
| BSU19510,yojB  | 2124529 | 2124765 | 0.69   | 0.64   | 0.93  |
| BSU19520,yojA  | 2124850 | 2126184 | 0.56   | 0.42   | 0.76  |
| BSU19530,yodA  | 2126549 | 2126938 | 1.15   | 1.08   | 0.94  |
| BSU19540,yodB  | 2127345 | 2127683 | 4.67   | 5.41   | 1.16  |
| BSU19550,yodC  | 2127813 | 2128421 | 9.44   | 10.84  | 1.15  |
| BSU19560,yodD  | 2128464 | 2129066 | 0.68   | 1.56   | 2.30  |
| BSU19570,yodE  | 2129082 | 2129993 | 0.33   | 0.57   | 1.73  |
| BSU19579,yoyD  | 2130177 | 2130377 | 0.08   | 2.14   | 27.43 |
| BSU19580,yodF  | 2130377 | 2131867 | 0.66   | 2.15   | 3.24  |
| BSU19590,ctpA  | 2131902 | 2133302 | 7.24   | 7.22   | 1.00  |
| BSU19600,yodH  | 2133455 | 2134156 | 0.15   | 0.12   | 0.83  |
| BSU19610,yodI  | 2134244 | 2134495 | 0.13   | 0.16   | 1.20  |
| BSU19620,yodJ  | 2134566 | 2135387 | 2.52   | 2.18   | 0.86  |
| BSU19630,deoD  | 2135470 | 2136171 | 6.42   | 3.98   | 0.62  |
| BSU19639,yoyE  | 2136373 | 2136498 | 0.21   | 0.27   | 1.32  |
| BSU19640,yodL  | 2136538 | 2136852 | 2.48   | 2.14   | 0.86  |
| BSU19650,yodM  | 2136913 | 2137524 | 1.45   | 0.93   | 0.64  |
| BSU19660,yozD  | 2137602 | 2137778 | 0.25   | 0.75   | 2.96  |
| BSU19669,yoyF  | 2137897 | 2138040 | 0.31   | 1.03   | 3.28  |
| BSU19670,yodN  | 2138037 | 2138717 | 0.16   | 0.72   | 4.59  |
| BSU19680,yozE  | 2138868 | 2139092 | 4.90   | 14.14  | 2.88  |
| BSU19689,yokU  | 2139179 | 2139457 | 0.13   | 0.22   | 1.64  |
| BSU19690,kamA  | 2139454 | 2140869 | 0.30   | 0.68   | 2.30  |
| BSU19700,yodP  | 2140898 | 2141725 | 0.08   | 0.10   | 1.30  |
| BSU19710,yodQ  | 2141703 | 2143013 | 0.05   | 0.05   | 1.11  |
| BSU19720,yodR  | 2143022 | 2143675 | 0.00   | 0.00   | 0.00  |
| BSU19730,yodS  | 2143660 | 2144349 | 0.00   | 0.00   | 0.00  |

|                |         |         |      |      |      |
|----------------|---------|---------|------|------|------|
| BSU19740,yodT  | 2144356 | 2145690 | 0.03 | 0.03 | 1.08 |
| BSU19749,yoyG  | 2145820 | 2145933 | 0.39 | 0.85 | 2.18 |
| BSU19750,cgeE  | 2146013 | 2146792 | 0.16 | 0.43 | 2.64 |
| BSU19760,cgeD  | 2146821 | 2148101 | 0.08 | 0.14 | 1.73 |
| BSU19770,cgeC  | 2148166 | 2148471 | 0.29 | 0.54 | 1.84 |
| BSU19780,cgeA  | 2148676 | 2149077 | 0.29 | 0.32 | 1.12 |
| BSU19790,cgeB  | 2149084 | 2150037 | 0.54 | 1.09 | 2.01 |
| BSU19800,phy   | 2150108 | 2151256 | 4.50 | 5.54 | 1.23 |
| BSU19820,yotN  | 2152086 | 2152262 | 0.00 | 0.00 | 0.00 |
| BSU19830,yotM  | 2152265 | 2152852 | 0.00 | 0.00 | 0.00 |
| BSU19840,yotL  | 2152927 | 2153169 | 0.00 | 0.00 | 0.00 |
| BSU19850,yotK  | 2153171 | 2153356 | 0.00 | 0.00 | 0.00 |
| BSU19860,yotJ  | 2153440 | 2153652 | 0.00 | 0.00 | 0.00 |
| BSU19870,yotI  | 2153718 | 2154080 | 0.00 | 0.00 | 0.00 |
| BSU19880,yotH  | 2154077 | 2154250 | 0.00 | 0.00 | 0.00 |
| BSU19890,yotG  | 2154266 | 2154583 | 0.00 | 0.00 | 0.00 |
| BSU19900,yotF  | 2154596 | 2154673 | 0.00 | 0.00 | 0.00 |
| BSU19910,yotE  | 2154705 | 2154851 | 0.00 | 0.00 | 0.00 |
| BSU19920,yotD  | 2154887 | 2155018 | 0.00 | 0.00 | 0.00 |
| BSU19930,yotC  | 2155058 | 2155249 | 0.00 | 0.00 | 0.00 |
| BSU19940,yotB  | 2155293 | 2156120 | 0.00 | 0.00 | 0.00 |
| BSU19950,sspC  | 2156239 | 2156457 | 0.00 | 0.00 | 0.00 |
| BSU19970,yosX  | 2156757 | 2157110 | 0.00 | 0.00 | 0.00 |
| BSU19980,yosW  | 2157341 | 2157682 | 0.00 | 0.00 | 0.00 |
| BSU19990,yosV  | 2157829 | 2158119 | 0.00 | 0.00 | 0.00 |
| BSU19999,yojW  | 2158120 | 2158287 | 0.00 | 0.00 | 0.00 |
| BSU20000,yosU  | 2158439 | 2158684 | 0.00 | 0.00 | 0.00 |
| BSU20010,yosT  | 2158724 | 2159173 | 0.00 | 0.00 | 0.00 |
| BSU20020,yosS  | 2159268 | 2159696 | 0.00 | 0.00 | 0.00 |
| BSU20030,yosR  | 2159742 | 2159984 | 0.00 | 0.00 | 0.00 |
| BSU20040,nrdF  | 2159981 | 2161778 | 0.00 | 0.00 | 0.00 |
| BSU20050,yosQ  | 2160565 | 2161086 | 0.00 | 0.00 | 0.00 |
| BSU20060,nrdEB | 2162108 | 2165614 | 0.00 | 0.00 | 0.00 |
| BSU20070,nrdI  | 2165577 | 2165966 | 0.00 | 0.00 | 0.00 |
| BSU20080,yosL  | 2165972 | 2166325 | 0.00 | 0.00 | 0.00 |
| BSU20090,yosK  | 2166413 | 2166613 | 0.00 | 0.00 | 0.00 |
| BSU20100,yosJ  | 2166658 | 2166852 | 0.00 | 0.00 | 0.00 |
| BSU20110,yosI  | 2166873 | 2167007 | 0.00 | 0.00 | 0.00 |
| BSU20120,yosH  | 2167039 | 2167509 | 0.00 | 0.00 | 0.00 |
| BSU20130,yosG  | 2167570 | 2167932 | 0.00 | 0.00 | 0.00 |
| BSU20140,yosF  | 2167975 | 2168100 | 0.00 | 0.00 | 0.00 |
| BSU20150,yosE  | 2168114 | 2168461 | 0.00 | 0.00 | 0.00 |
| BSU20160,yosD  | 2168476 | 2168871 | 0.00 | 0.00 | 0.00 |
| BSU20170,yosC  | 2168910 | 2169452 | 0.00 | 0.00 | 0.00 |
| BSU20180,yosB  | 2169497 | 2169676 | 0.00 | 0.00 | 0.00 |
| BSU20190,yosA  | 2169807 | 2169926 | 0.00 | 0.00 | 0.00 |
| BSU20200,yorZ  | 2170030 | 2170242 | 0.00 | 0.00 | 0.00 |



|               |         |         |      |      |      |
|---------------|---------|---------|------|------|------|
| BSU20210,yorY | 2170309 | 2170491 | 0.00 | 0.00 | 0.00 |
| BSU20220,yorX | 2170504 | 2170731 | 0.00 | 0.00 | 0.00 |
| BSU20230,yorW | 2170771 | 2171136 | 0.00 | 0.00 | 0.00 |
| BSU20240,yorV | 2171139 | 2171357 | 0.00 | 0.00 | 0.00 |
| BSU20250,mtbP | 2171401 | 2172732 | 0.00 | 0.00 | 0.00 |
| BSU20260,yorT | 2172781 | 2172900 | 0.00 | 0.00 | 0.00 |
| BSU20270,yorS | 2172932 | 2173450 | 0.00 | 0.00 | 0.00 |
| BSU20280,yorR | 2173459 | 2173956 | 0.00 | 0.00 | 0.00 |
| BSU20290,yorQ | 2173956 | 2174111 | 0.00 | 0.00 | 0.00 |
| BSU20300,yorP | 2174104 | 2174319 | 0.00 | 0.00 | 0.00 |
| BSU20310,yorO | 2174352 | 2174549 | 0.00 | 0.00 | 0.00 |
| BSU20320,yorN | 2174585 | 2174734 | 0.00 | 0.00 | 0.00 |
| BSU20330,yorM | 2174852 | 2175568 | 0.00 | 0.00 | 0.00 |
| BSU20340,yorL | 2175596 | 2179513 | 0.00 | 0.00 | 0.00 |
| BSU20350,yorK | 2179526 | 2181256 | 0.00 | 0.00 | 0.00 |
| BSU20360,yorJ | 2181256 | 2182392 | 0.00 | 0.00 | 0.00 |
| BSU20370,yorI | 2182408 | 2183922 | 0.00 | 0.00 | 0.00 |
| BSU20380,yorH | 2183937 | 2184407 | 0.00 | 0.00 | 0.00 |
| BSU20390,yorG | 2184450 | 2185421 | 0.00 | 0.00 | 0.00 |
| BSU20400,yorF | 2185504 | 2186418 | 0.00 | 0.00 | 0.00 |
| BSU20410,yorE | 2186440 | 2186811 | 0.00 | 0.00 | 0.00 |
| BSU20420,yorD | 2186985 | 2187299 | 0.00 | 0.00 | 0.00 |
| BSU20430,yorC | 2187376 | 2187756 | 0.00 | 0.00 | 0.00 |
| BSU20440,yorB | 2187819 | 2188115 | 0.00 | 0.00 | 0.00 |
| BSU20450,yorA | 2188204 | 2189964 | 0.00 | 0.00 | 0.00 |
| BSU20460,yoqZ | 2189961 | 2190785 | 0.00 | 0.00 | 0.00 |
| BSU20470,yoqY | 2190884 | 2191279 | 0.00 | 0.00 | 0.00 |
| BSU20480,yoqX | 2191334 | 2191555 | 0.00 | 0.00 | 0.00 |
| BSU20490,yoqW | 2191626 | 2192300 | 0.00 | 0.00 | 0.00 |
| BSU20500,ligB | 2192370 | 2193182 | 0.00 | 0.00 | 0.00 |
| BSU20510,yoqU | 2193248 | 2193661 | 0.00 | 0.00 | 0.00 |
| BSU20520,yoqT | 2193827 | 2193976 | 0.00 | 0.00 | 0.00 |
| BSU20530,yoqS | 2194053 | 2194400 | 0.00 | 0.00 | 0.00 |
| BSU20540,yoqR | 2194402 | 2194758 | 0.00 | 0.00 | 0.00 |
| BSU20550,yoqP | 2194718 | 2195059 | 0.00 | 0.00 | 0.00 |
| BSU20560,yoqO | 2195173 | 2195547 | 0.00 | 0.00 | 0.00 |
| BSU20570,yoqN | 2195564 | 2195782 | 0.00 | 0.00 | 0.00 |
| BSU20580,yoqM | 2195986 | 2196264 | 0.00 | 0.00 | 0.00 |
| BSU20590,yoqL | 2196389 | 2197081 | 0.00 | 0.00 | 0.00 |
| BSU20600,yoqK | 2197121 | 2197324 | 0.00 | 0.00 | 0.00 |
| BSU20610,yoqJ | 2197344 | 2197859 | 0.00 | 0.00 | 0.00 |
| BSU20620,yoqI | 2198070 | 2198264 | 0.00 | 0.00 | 0.00 |
| BSU20630,yoqH | 2198313 | 2198765 | 0.00 | 0.00 | 0.00 |
| BSU20640,yoqG | 2198848 | 2199105 | 0.00 | 0.00 | 0.00 |
| BSU20650,yoqF | 2199150 | 2199353 | 0.00 | 0.00 | 0.00 |
| BSU20660,yoqE | 2199362 | 2199526 | 0.00 | 0.00 | 0.00 |
| BSU20670,yoqD | 2199580 | 2200335 | 0.00 | 0.00 | 0.00 |

|               |         |         |      |      |      |
|---------------|---------|---------|------|------|------|
| BSU20680,yoqC | 2200376 | 2200783 | 0.00 | 0.00 | 0.00 |
| BSU20690,yoqB | 2200790 | 2201128 | 0.00 | 0.00 | 0.00 |
| BSU20700,yoqA | 2201125 | 2201475 | 0.00 | 0.00 | 0.00 |
| BSU20710,yopZ | 2201488 | 2201691 | 0.00 | 0.00 | 0.00 |
| BSU20720,yopY | 2201705 | 2201983 | 0.00 | 0.00 | 0.00 |
| BSU20730,yopX | 2201980 | 2202384 | 0.00 | 0.00 | 0.00 |
| BSU20740,yopW | 2202381 | 2202716 | 0.00 | 0.00 | 0.00 |
| BSU20750,yopV | 2202805 | 2202999 | 0.00 | 0.00 | 0.00 |
| BSU20760,yopU | 2203111 | 2203308 | 0.00 | 0.00 | 0.00 |
| BSU20770,yopT | 2203378 | 2203596 | 0.00 | 0.00 | 0.00 |
| BSU20780,yopS | 2203779 | 2204003 | 0.00 | 0.00 | 0.00 |
| BSU20790,yopR | 2204192 | 2205169 | 0.00 | 0.00 | 0.00 |
| BSU20800,yopQ | 2205193 | 2206575 | 0.00 | 0.00 | 0.00 |
| BSU20810,yopP | 2206682 | 2207758 | 0.00 | 0.00 | 0.00 |
| BSU20820,yopO | 2207748 | 2207960 | 0.00 | 0.00 | 0.00 |
| BSU20830,yopN | 2208008 | 2208325 | 0.00 | 0.00 | 0.00 |
| BSU20840,yopM | 2208328 | 2208528 | 0.00 | 0.00 | 0.00 |
| BSU20850,yopL | 2208855 | 2208980 | 0.00 | 0.00 | 0.00 |
| BSU20860,yopK | 2208994 | 2210154 | 0.00 | 0.00 | 0.00 |
| BSU20870,yopJ | 2210331 | 2210747 | 0.00 | 0.00 | 0.00 |
| BSU20880,yopI | 2210749 | 2211282 | 0.00 | 0.00 | 0.00 |
| BSU20890,yopH | 2211309 | 2211845 | 0.00 | 0.00 | 0.00 |
| BSU20900,yopG | 2211884 | 2212015 | 0.00 | 0.00 | 0.00 |
| BSU20910,yopF | 2212026 | 2212241 | 0.00 | 0.00 | 0.00 |
| BSU20920,yopE | 2212245 | 2212496 | 0.00 | 0.00 | 0.00 |
| BSU20928,yoyH | 2212567 | 2212746 | 0.00 | 0.00 | 0.00 |
| BSU20929,yoyI | 2212848 | 2213078 | 0.00 | 0.00 | 0.00 |
| BSU20930,yopD | 2213083 | 2213478 | 0.00 | 0.00 | 0.00 |
| BSU20940,yopC | 2213536 | 2214864 | 0.00 | 0.00 | 0.00 |
| BSU20950,yopB | 2214972 | 2215199 | 0.00 | 0.00 | 0.00 |
| BSU20960,yopA | 2215460 | 2216776 | 0.00 | 0.00 | 0.00 |
| BSU20970,yonX | 2217133 | 2217639 | 0.00 | 0.00 | 0.00 |
| BSU20980,yonV | 2217967 | 2219199 | 0.00 | 0.00 | 0.00 |
| BSU20990,yonU | 2219281 | 2219469 | 0.00 | 0.00 | 0.00 |
| BSU20999,yoyJ | 2219514 | 2219765 | 0.00 | 0.00 | 0.00 |
| BSU21000,yonT | 2219784 | 2219960 | 0.00 | 0.00 | 0.00 |
| BSU21010,yonS | 2220335 | 2220946 | 0.00 | 0.00 | 0.00 |
| BSU21020,yonR | 2221061 | 2221387 | 0.00 | 0.00 | 0.00 |
| BSU21030,yonP | 2222340 | 2222534 | 0.00 | 0.00 | 0.00 |
| BSU21040,yonO | 2222574 | 2225093 | 0.00 | 0.00 | 0.00 |
| BSU21050,yonN | 2225337 | 2225615 | 0.00 | 0.00 | 0.00 |
| BSU21060,yonK | 2227297 | 2227488 | 0.00 | 0.00 | 0.00 |
| BSU21070,yonJ | 2227505 | 2228722 | 0.00 | 0.00 | 0.00 |
| BSU21080,yonI | 2228756 | 2229166 | 0.00 | 0.00 | 0.00 |
| BSU21090,yonH | 2229385 | 2229885 | 0.00 | 0.00 | 0.00 |
| BSU21100,yonG | 2229988 | 2230908 | 0.00 | 0.00 | 0.00 |
| BSU21110,yonF | 2230895 | 2232664 | 0.00 | 0.00 | 0.00 |

|               |         |         |      |      |      |
|---------------|---------|---------|------|------|------|
| BSU21120,yonE | 2232682 | 2234202 | 0.00 | 0.00 | 0.00 |
| BSU21130,yonD | 2234233 | 2235669 | 0.00 | 0.00 | 0.00 |
| BSU21140,yonC | 2235694 | 2236230 | 0.00 | 0.00 | 0.00 |
| BSU21150,yonB | 2236269 | 2237285 | 0.00 | 0.00 | 0.00 |
| BSU21160,yonA | 2237321 | 2237791 | 0.00 | 0.00 | 0.00 |
| BSU21170,yomZ | 2237806 | 2238201 | 0.00 | 0.00 | 0.00 |
| BSU21180,yomY | 2238198 | 2238452 | 0.00 | 0.00 | 0.00 |
| BSU21190,yomX | 2238436 | 2239086 | 0.00 | 0.00 | 0.00 |
| BSU21200,yomW | 2239083 | 2239589 | 0.00 | 0.00 | 0.00 |
| BSU21210,yomV | 2239586 | 2240296 | 0.00 | 0.00 | 0.00 |
| BSU21220,yomU | 2240339 | 2241136 | 0.00 | 0.00 | 0.00 |
| BSU21229,youA | 2241154 | 2241765 | 0.00 | 0.00 | 0.00 |
| BSU21230,yomT | 2241765 | 2241992 | 0.00 | 0.00 | 0.00 |
| BSU21240,yomS | 2242056 | 2242412 | 0.00 | 0.00 | 0.00 |
| BSU21250,yomR | 2242414 | 2243631 | 0.00 | 0.00 | 0.00 |
| BSU21260,yomQ | 2243642 | 2243992 | 0.00 | 0.00 | 0.00 |
| BSU21270,yomP | 2243989 | 2244180 | 0.00 | 0.00 | 0.00 |
| BSU21280,yomO | 2244230 | 2244730 | 0.00 | 0.00 | 0.00 |
| BSU21290,yomN | 2244714 | 2245133 | 0.00 | 0.00 | 0.00 |
| BSU21300,yomM | 2245147 | 2246148 | 0.00 | 0.00 | 0.00 |
| BSU21310,yozP | 2246151 | 2246480 | 0.00 | 0.00 | 0.00 |
| BSU21320,yomL | 2246656 | 2247342 | 0.06 | 0.28 | 4.96 |
| BSU21329,youB | 2247367 | 2247543 | 0.00 | 0.00 | 0.00 |
| BSU21330,yomK | 2247889 | 2248335 | 0.00 | 0.00 | 0.00 |
| BSU21340,yomJ | 2248417 | 2249100 | 0.00 | 0.00 | 0.00 |
| BSU21350,yomI | 2249154 | 2256011 | 0.00 | 0.00 | 0.00 |
| BSU21360,yomH | 2256062 | 2256820 | 0.00 | 0.00 | 0.00 |
| BSU21370,yomG | 2256832 | 2259459 | 0.00 | 0.00 | 0.00 |
| BSU21380,yomF | 2259475 | 2260296 | 0.00 | 0.00 | 0.00 |
| BSU21390,yomE | 2260333 | 2262267 | 0.00 | 0.00 | 0.00 |
| BSU21400,yomD | 2262437 | 2263261 | 0.00 | 0.00 | 0.00 |
| BSU21410,blyA | 2263489 | 2264592 | 0.00 | 0.00 | 0.00 |
| BSU21420,bhlA | 2264680 | 2264892 | 0.00 | 0.00 | 0.00 |
| BSU21430,bhlB | 2264903 | 2265169 | 0.00 | 0.00 | 0.00 |
| BSU21440,bdbB | 2265225 | 2265671 | 0.00 | 0.00 | 0.00 |
| BSU21450,yolJ | 2265668 | 2266936 | 0.00 | 0.00 | 0.00 |
| BSU21460,bdbA | 2266936 | 2267349 | 0.00 | 0.00 | 0.00 |
| BSU21470,sunT | 2267346 | 2269463 | 0.00 | 0.00 | 0.00 |
| BSU21480,sunA | 2269521 | 2269691 | 0.00 | 0.00 | 0.00 |
| BSU21490,sunI | 2269988 | 2270305 | 0.00 | 0.00 | 0.00 |
| BSU21500,uvrX | 2270407 | 2271657 | 0.00 | 0.00 | 0.00 |
| BSU21510,yolD | 2271650 | 2271982 | 0.00 | 0.00 | 0.00 |
| BSU21520,yolC | 2272156 | 2272491 | 0.00 | 0.00 | 0.00 |
| BSU21530,yolB | 2272534 | 2272890 | 0.00 | 0.00 | 0.00 |
| BSU21540,yolA | 2272896 | 2273363 | 0.00 | 0.00 | 0.00 |
| BSU21550,yokL | 2273989 | 2274522 | 0.00 | 0.00 | 0.00 |
| BSU21560,yokK | 2274558 | 2275136 | 0.00 | 0.00 | 0.00 |

|               |         |         |        |        |      |
|---------------|---------|---------|--------|--------|------|
| BSU21570,yokJ | 2275200 | 2275697 | 0.00   | 0.00   | 0.00 |
| BSU21580,yokI | 2275706 | 2277421 | 0.00   | 0.00   | 0.00 |
| BSU21590,yokH | 2277521 | 2278078 | 0.00   | 0.00   | 0.00 |
| BSU21600,yokG | 2278602 | 2279675 | 0.00   | 0.00   | 0.00 |
| BSU21610,yokF | 2279977 | 2280867 | 0.00   | 0.00   | 0.00 |
| BSU21620,yokE | 2280881 | 2281363 | 0.00   | 0.00   | 0.00 |
| BSU21630,yokD | 2281667 | 2282485 | 0.00   | 0.00   | 0.00 |
| BSU21640,yokC | 2283136 | 2283651 | 0.00   | 0.00   | 0.00 |
| BSU21650,yokB | 2283858 | 2284568 | 0.00   | 0.00   | 0.00 |
| BSU21660,yokA | 2284771 | 2286408 | 0.00   | 0.00   | 0.00 |
| BSU21680,yppQ | 2287097 | 2287528 | 3.85   | 6.56   | 1.70 |
| BSU21690,msrA | 2287529 | 2288062 | 1.71   | 3.67   | 2.14 |
| BSU21700,ypoP | 2288194 | 2288619 | 13.52  | 17.05  | 1.26 |
| BSU21710,dinF | 2288669 | 2290006 | 2.60   | 2.47   | 0.95 |
| BSU21720,ypmT | 2290078 | 2290272 | 14.35  | 12.72  | 0.89 |
| BSU21730,ypmS | 2290285 | 2290848 | 11.21  | 9.38   | 0.84 |
| BSU21740,ypmR | 2290858 | 2291625 | 6.40   | 6.93   | 1.08 |
| BSU21750,scuA | 2291703 | 2292284 | 0.74   | 1.49   | 2.02 |
| BSU21760,ypmP | 2292432 | 2292683 | 21.96  | 66.93  | 3.05 |
| BSU21770,ilvA | 2292769 | 2294037 | 0.38   | 2.28   | 6.02 |
| BSU21780,yplP | 2294286 | 2295281 | 1.76   | 2.34   | 1.33 |
| BSU21790,yplQ | 2295302 | 2295943 | 5.32   | 6.58   | 1.24 |
| BSU21800,ypkP | 2295982 | 2296602 | 36.25  | 72.93  | 2.01 |
| BSU21810,dfrA | 2296603 | 2297109 | 15.43  | 16.42  | 1.06 |
| BSU21820,thyA | 2297106 | 2297900 | 12.37  | 14.88  | 1.20 |
| BSU21830,ypjQ | 2297984 | 2298517 | 35.70  | 37.17  | 1.04 |
| BSU21840,ypjP | 2298535 | 2299146 | 21.39  | 26.60  | 1.24 |
| BSU21850,ypiP | 2299406 | 2300179 | 7.34   | 14.89  | 2.03 |
| BSU21860,yphP | 2300221 | 2300655 | 19.61  | 19.07  | 0.97 |
| BSU21870,ilvD | 2300762 | 2302438 | 1.18   | 2.88   | 2.44 |
| BSU21880,ypgR | 2302727 | 2303860 | 19.57  | 22.20  | 1.13 |
| BSU21890,ypgQ | 2303920 | 2304537 | 1.81   | 4.47   | 2.47 |
| BSU21900,bsaA | 2304553 | 2305035 | 0.86   | 2.62   | 3.05 |
| BSU21910,metA | 2305378 | 2306283 | 6.32   | 11.73  | 1.86 |
| BSU21920,ugtP | 2306514 | 2307662 | 33.51  | 29.18  | 0.87 |
| BSU21930,cspD | 2307905 | 2308105 | 139.76 | 362.87 | 2.60 |
| BSU21940,degR | 2308157 | 2308339 | 3.73   | 9.36   | 2.51 |
| BSU21950,ypzA | 2308495 | 2308764 | 4.65   | 4.91   | 1.06 |
| BSU21960,ypeQ | 2308792 | 2308974 | 3.59   | 5.12   | 1.43 |
| BSU21970,ypeP | 2308967 | 2309647 | 2.78   | 3.88   | 1.40 |
| BSU21980,ypdP | 2309730 | 2310419 | 4.67   | 6.75   | 1.45 |
| BSU21990,ypdQ | 2310419 | 2310817 | 15.34  | 22.77  | 1.48 |
| BSU22000,sspL | 2310859 | 2310987 | 16.08  | 22.71  | 1.41 |
| BSU22010,exoA | 2310995 | 2311885 | 16.02  | 9.31   | 0.58 |
| BSU22019,ypzF | 2311986 | 2312132 | 7.47   | 24.79  | 3.32 |
| BSU22020,ypbS | 2312207 | 2312464 | 8.30   | 32.92  | 3.97 |
| BSU22030,ypbR | 2312529 | 2316110 | 0.52   | 1.44   | 2.76 |

|               |         |         |        |        |      |
|---------------|---------|---------|--------|--------|------|
| BSU22040,ypbQ | 2316446 | 2316952 | 0.17   | 0.24   | 1.45 |
| BSU22050,bcsA | 2316956 | 2318053 | 0.21   | 0.31   | 1.44 |
| BSU22060,pbuX | 2318127 | 2319443 | 4.65   | 1.12   | 0.24 |
| BSU22070,xpt  | 2319440 | 2320024 | 5.32   | 1.25   | 0.23 |
| BSU22080,ypwA | 2320355 | 2321860 | 4.13   | 3.25   | 0.79 |
| BSU22090,kdgT | 2321972 | 2322964 | 3.09   | 1.72   | 0.56 |
| BSU22100,kdgA | 2323009 | 2323599 | 2.22   | 1.07   | 0.48 |
| BSU22110,kdgK | 2323601 | 2324575 | 2.18   | 1.12   | 0.52 |
| BSU22120,kdgR | 2324613 | 2325632 | 1.15   | 0.74   | 0.64 |
| BSU22130,kdul | 2325854 | 2326681 | 1.73   | 2.17   | 1.25 |
| BSU22140,kduD | 2326683 | 2327447 | 2.15   | 2.15   | 1.00 |
| BSU22150,ypvA | 2327488 | 2329413 | 14.26  | 7.32   | 0.51 |
| BSU22160,yptA | 2329515 | 2329706 | 4.72   | 2.70   | 0.57 |
| BSU22169,ypzG | 2329870 | 2330022 | 11.11  | 11.62  | 1.05 |
| BSU22170,ypsC | 2330075 | 2331232 | 12.33  | 5.76   | 0.47 |
| BSU22180,ypsB | 2331779 | 2332075 | 23.18  | 20.79  | 0.90 |
| BSU22190,ypsA | 2332153 | 2332782 | 28.70  | 15.01  | 0.52 |
| BSU22200,cotD | 2332784 | 2333011 | 202.61 | 95.17  | 0.47 |
| BSU22210,yprB | 2333324 | 2334565 | 8.59   | 4.67   | 0.54 |
| BSU22220,yprA | 2334581 | 2336830 | 6.95   | 4.46   | 0.64 |
| BSU22230,ypqE | 2336933 | 2337439 | 5.31   | 6.45   | 1.21 |
| BSU22240,ypqA | 2337577 | 2337996 | 0.17   | 0.19   | 1.07 |
| BSU22250,yppG | 2338017 | 2338394 | 0.09   | 0.14   | 1.53 |
| BSU22260,yppF | 2338582 | 2338770 | 119.34 | 223.12 | 1.87 |
| BSU22270,yppE | 2338809 | 2339180 | 4.29   | 6.18   | 1.44 |
| BSU22280,yppD | 2339226 | 2339471 | 0.46   | 1.88   | 4.07 |
| BSU22290,sspM | 2339670 | 2339774 | 0.22   | 0.69   | 3.06 |
| BSU22300,yppC | 2339799 | 2340761 | 3.82   | 2.12   | 0.56 |
| BSU22310,recU | 2340802 | 2341422 | 8.17   | 5.03   | 0.62 |
| BSU22320,ponA | 2341444 | 2344188 | 16.45  | 9.00   | 0.55 |
| BSU22330,ypoC | 2344264 | 2344758 | 8.94   | 11.74  | 1.31 |
| BSU22340,nth  | 2344755 | 2345414 | 9.98   | 14.07  | 1.41 |
| BSU22350,dnaD | 2345433 | 2346131 | 7.50   | 10.91  | 1.45 |
| BSU22360,asnC | 2346224 | 2347516 | 46.33  | 34.48  | 0.74 |
| BSU22370,aspB | 2347660 | 2348841 | 35.00  | 39.47  | 1.13 |
| BSU22380,ypmB | 2348864 | 2349349 | 22.96  | 22.36  | 0.97 |
| BSU22390,ypmA | 2349358 | 2349528 | 15.09  | 11.47  | 0.76 |
| BSU22400,dinG | 2349671 | 2352466 | 19.16  | 12.91  | 0.67 |
| BSU22410,panD | 2352592 | 2352975 | 54.99  | 22.45  | 0.41 |
| BSU22420,panC | 2352977 | 2353837 | 48.07  | 17.53  | 0.36 |
| BSU22430,panB | 2353839 | 2354672 | 34.27  | 12.25  | 0.36 |
| BSU22440,birA | 2354918 | 2355895 | 8.28   | 3.69   | 0.45 |
| BSU22450,cca  | 2355880 | 2357073 | 6.35   | 3.76   | 0.59 |
| BSU22460,ypjH | 2357078 | 2358211 | 8.54   | 7.06   | 0.83 |
| BSU22470,ypjG | 2358208 | 2358918 | 3.11   | 3.43   | 1.10 |
| BSU22480,mgsA | 2358911 | 2359324 | 4.86   | 5.05   | 1.04 |
| BSU22490,dapB | 2359340 | 2360143 | 3.38   | 3.42   | 1.01 |

|                 |         |         |        |        |      |
|-----------------|---------|---------|--------|--------|------|
| BSU22500,ypjD   | 2360155 | 2360490 | 2.63   | 3.27   | 1.24 |
| BSU22510,ypjC   | 2360630 | 2361502 | 2.89   | 1.90   | 0.66 |
| BSU22520,ypjB   | 2361544 | 2362338 | 11.28  | 6.21   | 0.55 |
| BSU22530,ypjA   | 2362407 | 2362964 | 7.85   | 3.20   | 0.41 |
| BSU22540,qcrC   | 2363111 | 2363878 | 10.60  | 6.18   | 0.58 |
| BSU22550,qcrB   | 2363913 | 2364587 | 10.66  | 6.17   | 0.58 |
| BSU22560,qcrA   | 2364589 | 2365092 | 8.79   | 5.10   | 0.58 |
| BSU22570,ypiF   | 2365235 | 2365681 | 0.26   | 0.68   | 2.60 |
| BSU22580,ypiB   | 2365736 | 2366275 | 4.14   | 10.62  | 2.56 |
| BSU22590,ypiA   | 2366347 | 2367618 | 4.01   | 5.21   | 1.30 |
| BSU22600,aroE   | 2367954 | 2369240 | 16.72  | 21.42  | 1.28 |
| BSU22610,tyrA   | 2369251 | 2370366 | 3.44   | 7.15   | 2.08 |
| BSU22620,hisC   | 2370415 | 2371497 | 13.31  | 16.38  | 1.23 |
| BSU22630,trpA   | 2371508 | 2372311 | 6.97   | 8.91   | 1.28 |
| BSU22640,trpB   | 2372304 | 2373506 | 0.13   | 0.20   | 1.62 |
| BSU22650,trpF   | 2373487 | 2374134 | 0.07   | 0.15   | 2.15 |
| BSU22660,trpC   | 2374139 | 2374888 | 0.09   | 0.17   | 1.89 |
| BSU22670,trpD   | 2374881 | 2375897 | 0.08   | 0.16   | 2.10 |
| BSU22680,trpE   | 2375869 | 2377416 | 0.12   | 0.34   | 2.77 |
| BSU22690,aroH   | 2377632 | 2378015 | 23.43  | 41.59  | 1.77 |
| BSU22700,aroB   | 2378012 | 2379100 | 21.42  | 36.77  | 1.72 |
| BSU22710,aroF   | 2379100 | 2380272 | 20.79  | 34.37  | 1.65 |
| BSU22720,cheR   | 2380347 | 2381117 | 2.92   | 4.52   | 1.55 |
| BSU22730,ndk    | 2381354 | 2381803 | 37.73  | 28.24  | 0.75 |
| BSU22740,hepT   | 2381919 | 2382965 | 45.78  | 27.76  | 0.61 |
| BSU22750,ubiE   | 2382907 | 2383608 | 51.76  | 33.46  | 0.65 |
| BSU22760,hepS   | 2383615 | 2384370 | 90.81  | 77.38  | 0.85 |
| BSU22770,mtrB   | 2384534 | 2384761 | 27.75  | 27.71  | 1.00 |
| BSU22780,foIE   | 2384783 | 2385355 | 23.07  | 20.87  | 0.90 |
| BSU22790,hbs    | 2385543 | 2385821 | 794.93 | 976.36 | 1.23 |
| BSU22800,spoIVA | 2386195 | 2387673 | 0.50   | 1.54   | 3.06 |
| BSU22810,yphF   | 2387854 | 2388588 | 7.32   | 10.05  | 1.37 |
| BSU22820,yphE   | 2388610 | 2388813 | 7.31   | 10.87  | 1.49 |
| BSU22830,gpsA   | 2389151 | 2390188 | 26.29  | 12.87  | 0.49 |
| BSU22840,engA   | 2390206 | 2391516 | 17.65  | 7.43   | 0.42 |
| BSU22849,ypzH   | 2391670 | 2391864 | 0.44   | 0.60   | 1.36 |
| BSU22850,seaA   | 2391861 | 2392754 | 0.28   | 0.52   | 1.88 |
| BSU22860,yphA   | 2392751 | 2393350 | 0.20   | 0.61   | 3.04 |
| BSU22869,ypzI   | 2393422 | 2393559 | 0.75   | 1.81   | 2.42 |
| BSU22870,fni    | 2393602 | 2394651 | 11.81  | 23.72  | 2.01 |
| BSU22880,rpsA   | 2394664 | 2395812 | 34.92  | 81.79  | 2.34 |
| BSU22890,cmk    | 2396045 | 2396719 | 9.31   | 9.24   | 0.99 |
| BSU22900,ypfB   | 2396798 | 2396974 | 1.17   | 2.56   | 2.18 |
| BSU22910,ypfA   | 2397019 | 2397672 | 1.03   | 2.10   | 2.04 |
| BSU22920,ypeB   | 2397765 | 2399117 | 0.30   | 0.67   | 2.21 |
| BSU22930,sleB   | 2399152 | 2400069 | 0.08   | 0.16   | 1.93 |
| BSU22940,prsW   | 2400208 | 2400864 | 13.35  | 11.94  | 0.89 |

|                  |         |         |       |       |      |
|------------------|---------|---------|-------|-------|------|
| BSU22950,ypdA    | 2400984 | 2401958 | 9.22  | 10.77 | 1.17 |
| BSU22960,gudB    | 2402067 | 2403350 | 29.62 | 26.12 | 0.88 |
| BSU22970,ypbH    | 2403506 | 2404090 | 11.08 | 13.56 | 1.22 |
| BSU22980,ypbG    | 2404249 | 2405028 | 1.75  | 0.86  | 0.49 |
| BSU22990,ypbF    | 2405114 | 2405557 | 1.05  | 1.66  | 1.58 |
| BSU23000,ypbE    | 2405620 | 2406342 | 16.79 | 14.06 | 0.84 |
| BSU23010,ypbD    | 2406293 | 2406862 | 23.60 | 17.25 | 0.73 |
| BSU23020,recQ    | 2406922 | 2408412 | 18.81 | 13.54 | 0.72 |
| BSU23030,ypbB    | 2408405 | 2409463 | 10.44 | 8.38  | 0.80 |
| BSU23040,fer     | 2409729 | 2409977 | 79.58 | 76.36 | 0.96 |
| BSU23050,fmnP    | 2410017 | 2410589 | 9.95  | 10.80 | 1.09 |
| BSU23060,ypzE    | 2410695 | 2410859 | 5.67  | 8.44  | 1.49 |
| BSU23070,serA    | 2411086 | 2412663 | 6.14  | 47.31 | 7.70 |
| BSU23080,aroD    | 2412706 | 2413473 | 1.79  | 4.99  | 2.79 |
| BSU23090,rsiX    | 2413585 | 2414691 | 12.08 | 10.72 | 0.89 |
| BSU23100,sigX    | 2414627 | 2415211 | 2.31  | 3.35  | 1.45 |
| BSU23110,resE    | 2415415 | 2417184 | 22.00 | 11.64 | 0.53 |
| BSU23120,resD    | 2417181 | 2417903 | 19.71 | 10.96 | 0.56 |
| BSU23130,resC    | 2417984 | 2419159 | 16.96 | 8.97  | 0.53 |
| BSU23140,resB    | 2419179 | 2420807 | 10.50 | 5.12  | 0.49 |
| BSU23150,resA    | 2420804 | 2421343 | 2.92  | 3.19  | 1.09 |
| BSU23160,rluB    | 2421438 | 2422172 | 4.35  | 3.33  | 0.77 |
| BSU23170,spmB    | 2422264 | 2422800 | 0.39  | 0.61  | 1.55 |
| BSU23180,spmA    | 2422805 | 2423395 | 0.55  | 0.76  | 1.40 |
| BSU23190,dacB    | 2423383 | 2424531 | 0.59  | 0.83  | 1.41 |
| BSU23200,ypuI    | 2424654 | 2425193 | 39.14 | 18.98 | 0.48 |
| BSU23210,spcB    | 2425248 | 2425841 | 13.28 | 6.13  | 0.46 |
| BSU23220,scpA    | 2425831 | 2426586 | 8.58  | 4.80  | 0.56 |
| BSU23230,ypuF    | 2426867 | 2427391 | 1.59  | 0.97  | 0.61 |
| BSU23240,ypzK    | 2427405 | 2427779 | 37.67 | 57.85 | 1.54 |
| BSU23250,ribH    | 2427892 | 2428356 | 28.51 | 50.01 | 1.75 |
| BSU23260,ribA    | 2428389 | 2429585 | 19.02 | 31.72 | 1.67 |
| BSU23270,ribE    | 2429600 | 2430247 | 6.25  | 8.20  | 1.31 |
| BSU23280,ribD    | 2430258 | 2431343 | 5.15  | 5.78  | 1.12 |
| BSU23300,ypuD    | 2431737 | 2432081 | 3.78  | 2.11  | 0.56 |
| BSU23310,sipS    | 2432316 | 2432870 | 5.81  | 6.01  | 1.03 |
| BSU23320,ypzC    | 2433137 | 2433373 | 1.15  | 1.69  | 1.47 |
| BSU23328,ypzJ    | 2433316 | 2433522 | 0.75  | 1.35  | 1.79 |
| BSU23340,ypuB    | 2434143 | 2434346 | 0.25  | 0.23  | 0.93 |
| BSU23350,ypzD    | 2435012 | 2435224 | 0.10  | 0.09  | 0.90 |
| BSU23360,ppiB    | 2435360 | 2435791 | 37.25 | 31.48 | 0.85 |
| BSU23370,ypuA    | 2436045 | 2436917 | 9.95  | 4.32  | 0.43 |
| BSU23380,lysA    | 2436947 | 2438266 | 7.96  | 20.07 | 2.52 |
| BSU23390,spoVAF  | 2438372 | 2439853 | 0.77  | 0.90  | 1.17 |
| BSU23401,spoVAEA | 2439804 | 2440415 | 0.25  | 0.60  | 2.39 |
| BSU23402,spoVAEB | 2440423 | 2440773 | 0.24  | 0.61  | 2.52 |
| BSU23410,spoVAD  | 2440775 | 2441791 | 0.14  | 0.41  | 2.83 |

|                 |         |         |        |        |      |
|-----------------|---------|---------|--------|--------|------|
| BSU23420,spoVAC | 2441804 | 2442256 | 0.07   | 0.21   | 2.95 |
| BSU23430,spoVAB | 2442269 | 2442694 | 0.00   | 0.00   | 0.00 |
| BSU23440,spoVAA | 2442684 | 2443304 | 0.06   | 0.17   | 2.76 |
| BSU23450,sigF   | 2443429 | 2444196 | 1.54   | 1.70   | 1.10 |
| BSU23460,spoIAB | 2444208 | 2444648 | 1.82   | 2.06   | 1.13 |
| BSU23470,spoIAA | 2444645 | 2444998 | 1.21   | 1.48   | 1.23 |
| BSU23480,dacF   | 2445094 | 2446263 | 0.41   | 0.25   | 0.63 |
| BSU23490,pupG   | 2446418 | 2447233 | 102.22 | 58.51  | 0.57 |
| BSU23500,drm    | 2447246 | 2448430 | 53.28  | 29.34  | 0.55 |
| BSU23510,xerD   | 2448591 | 2449481 | 6.81   | 7.52   | 1.10 |
| BSU23519,yqzK   | 2449489 | 2449716 | 3.14   | 4.81   | 1.53 |
| BSU23520,fur    | 2449841 | 2450290 | 13.29  | 8.57   | 0.64 |
| BSU23530,spoIIM | 2450403 | 2451047 | 0.08   | 0.10   | 1.20 |
| BSU23540,yqkK   | 2451148 | 2451363 | 0.19   | 0.13   | 0.67 |
| BSU23550,mleA   | 2451463 | 2452782 | 104.67 | 56.72  | 0.54 |
| BSU23560,mleN   | 2452800 | 2454206 | 44.29  | 22.57  | 0.51 |
| BSU23570,aspA   | 2454347 | 2455774 | 13.14  | 14.18  | 1.08 |
| BSU23580,ansA   | 2455819 | 2456808 | 3.68   | 4.92   | 1.34 |
| BSU23590,ansR   | 2456990 | 2457340 | 3.23   | 4.21   | 1.31 |
| BSU23600,yqxK   | 2457349 | 2458512 | 3.61   | 2.80   | 0.78 |
| BSU23610,nudF   | 2458509 | 2459066 | 2.53   | 2.25   | 0.89 |
| BSU23620,yqkF   | 2459326 | 2460246 | 4.59   | 5.86   | 1.27 |
| BSU23630,yqkE   | 2460278 | 2460502 | 1.17   | 1.60   | 1.37 |
| BSU23640,yqkD   | 2460664 | 2461581 | 1.94   | 1.71   | 0.88 |
| BSU23650,yqkC   | 2461621 | 2461860 | 79.21  | 179.32 | 2.26 |
| BSU23660,yqkB   | 2461873 | 2462196 | 16.91  | 18.60  | 1.10 |
| BSU23670,yqkA   | 2462193 | 2463224 | 2.87   | 3.39   | 1.18 |
| BSU23680,yqjZ   | 2463217 | 2463561 | 0.91   | 1.51   | 1.65 |
| BSU23690,yqjY   | 2463571 | 2464041 | 0.65   | 1.00   | 1.55 |
| BSU23700,yqjX   | 2464227 | 2464565 | 0.07   | 0.11   | 1.54 |
| BSU23710,yqjW   | 2464562 | 2465800 | 0.08   | 0.09   | 1.08 |
| BSU23720,yqzH   | 2465966 | 2466172 | 1.58   | 1.95   | 1.23 |
| BSU23730,yqjV   | 2466721 | 2467953 | 1.10   | 1.71   | 1.56 |
| BSU23740,yqjU   | 2467971 | 2468162 | 17.12  | 13.91  | 0.81 |
| BSU23750,yqjT   | 2468159 | 2468545 | 17.96  | 14.35  | 0.80 |
| BSU23760,coaA   | 2468549 | 2469508 | 8.65   | 6.37   | 0.74 |
| BSU23770,dsdA   | 2469580 | 2470926 | 1.66   | 2.15   | 1.30 |
| BSU23780,yqjQ   | 2471002 | 2471781 | 2.76   | 3.40   | 1.23 |
| BSU23790,yqjP   | 2471787 | 2472746 | 3.43   | 3.85   | 1.12 |
| BSU23800,proI   | 2473151 | 2473987 | 4.53   | 4.76   | 1.05 |
| BSU23810,yqjN   | 2474028 | 2475671 | 0.69   | 2.14   | 3.11 |
| BSU23820,yqjM   | 2475843 | 2476859 | 3.13   | 2.80   | 0.89 |
| BSU23830,yqjL   | 2476969 | 2477730 | 16.09  | 7.39   | 0.46 |
| BSU23840,yqjK   | 2478006 | 2478929 | 4.34   | 3.14   | 0.72 |
| BSU23850,zwf    | 2479156 | 2480625 | 54.82  | 46.98  | 0.86 |
| BSU23860,yqjI   | 2480750 | 2482159 | 93.23  | 95.85  | 1.03 |
| BSU23870,yqjH   | 2482269 | 2483513 | 1.51   | 1.91   | 1.27 |



|                 |         |         |        |       |      |
|-----------------|---------|---------|--------|-------|------|
| BSU23880,yqzJ   | 2483586 | 2483873 | 12.23  | 13.84 | 1.13 |
| BSU23890,yqjG   | 2483904 | 2484731 | 34.84  | 24.48 | 0.70 |
| BSU23900,yqjF   | 2484911 | 2485639 | 4.86   | 19.22 | 3.95 |
| BSU23910,yqjE   | 2485680 | 2486795 | 17.99  | 16.82 | 0.94 |
| BSU23920,yqjD   | 2486813 | 2488336 | 5.41   | 3.83  | 0.71 |
| BSU23930,yqjC   | 2488329 | 2488751 | 0.12   | 0.47  | 3.84 |
| BSU23940,yqjB   | 2488953 | 2489483 | 1.02   | 1.53  | 1.51 |
| BSU23950,yqjA   | 2489535 | 2490503 | 7.86   | 5.65  | 0.72 |
| BSU23960,artR   | 2490574 | 2491296 | 10.76  | 3.00  | 0.28 |
| BSU23970,artQ   | 2491289 | 2491948 | 6.55   | 1.82  | 0.28 |
| BSU23980,artP   | 2492029 | 2492796 | 9.75   | 2.76  | 0.28 |
| BSU23990,yqiW   | 2493064 | 2493501 | 12.37  | 15.88 | 1.28 |
| BSU24000,bmrU   | 2493662 | 2494555 | 0.16   | 0.35  | 2.15 |
| BSU24010,bmr    | 2494656 | 2495825 | 15.52  | 49.51 | 3.19 |
| BSU24020,bmrR   | 2495898 | 2496734 | 1.02   | 6.92  | 6.78 |
| BSU24030,bkdB   | 2496796 | 2498070 | 34.55  | 12.67 | 0.37 |
| BSU24040,bkdAB  | 2498093 | 2499076 | 33.54  | 10.96 | 0.33 |
| BSU24050,bkdAA  | 2499090 | 2500082 | 26.19  | 8.80  | 0.34 |
| BSU24060,lpdV   | 2500104 | 2501528 | 18.66  | 6.91  | 0.37 |
| BSU24070,buk    | 2501549 | 2502640 | 6.38   | 2.65  | 0.41 |
| BSU24080,bcd    | 2502659 | 2503753 | 9.88   | 3.87  | 0.39 |
| BSU24090,ptb    | 2503765 | 2504664 | 8.34   | 3.93  | 0.47 |
| BSU24100,bkdR   | 2504789 | 2506867 | 7.65   | 3.76  | 0.49 |
| BSU24110,yqzF   | 2507020 | 2507256 | 74.24  | 54.25 | 0.73 |
| BSU24120,prpB   | 2507298 | 2508203 | 2.00   | 1.81  | 0.90 |
| BSU24130,prpD   | 2508221 | 2509639 | 0.41   | 0.42  | 1.02 |
| BSU24140,mmgD   | 2509654 | 2510772 | 0.10   | 0.11  | 1.12 |
| BSU24150,mmgC   | 2510806 | 2511945 | 0.06   | 0.06  | 0.96 |
| BSU24160,mmgB   | 2511973 | 2512836 | 0.05   | 0.06  | 1.10 |
| BSU24170,mmgA   | 2512861 | 2514042 | 0.04   | 0.04  | 1.05 |
| BSU24180,yqiK   | 2514169 | 2514900 | 3.84   | 5.87  | 1.53 |
| BSU24190,yqil   | 2514979 | 2515599 | 0.21   | 0.30  | 1.40 |
| BSU24200,yqiH   | 2515614 | 2515907 | 0.17   | 0.23  | 1.37 |
| BSU24210,yqiG   | 2516440 | 2517558 | 2.32   | 2.17  | 0.93 |
| BSU24220,spo0A  | 2518023 | 2518826 | 31.59  | 23.69 | 0.75 |
| BSU24230,spoIVB | 2519102 | 2520382 | 0.15   | 0.34  | 2.24 |
| BSU24240,recN   | 2520557 | 2522287 | 13.19  | 11.03 | 0.84 |
| BSU24250,ahrC   | 2522324 | 2522773 | 11.39  | 7.87  | 0.69 |
| BSU24260,yqxC   | 2522871 | 2523716 | 18.75  | 15.75 | 0.84 |
| BSU24270,dxs    | 2523713 | 2525614 | 21.14  | 17.17 | 0.81 |
| BSU24280,ispA   | 2525789 | 2526679 | 4.68   | 2.08  | 0.44 |
| BSU24290,xseB   | 2526669 | 2526923 | 4.40   | 2.05  | 0.47 |
| BSU24300,xseA   | 2526920 | 2528266 | 3.23   | 1.72  | 0.53 |
| BSU24310,foID   | 2528404 | 2529255 | 30.08  | 32.32 | 1.07 |
| BSU24320,nusB   | 2529267 | 2529662 | 24.82  | 25.19 | 1.01 |
| BSU24330,yqhY   | 2529926 | 2530333 | 102.21 | 80.75 | 0.79 |
| BSU24340,accC   | 2530354 | 2531706 | 37.96  | 24.12 | 0.64 |

|                  |         |         |       |       |       |
|------------------|---------|---------|-------|-------|-------|
| BSU24350,accB    | 2531718 | 2532197 | 22.22 | 15.66 | 0.70  |
| BSU24360,spoIIAH | 2532353 | 2533009 | 0.13  | 0.18  | 1.37  |
| BSU24370,spoIIAG | 2533010 | 2533699 | 0.10  | 0.11  | 1.08  |
| BSU24380,spoIIAF | 2533692 | 2534312 | 0.08  | 0.09  | 1.12  |
| BSU24390,spoIIAE | 2534326 | 2535525 | 0.10  | 0.11  | 1.01  |
| BSU24400,spoIIAD | 2535544 | 2535945 | 0.00  | 0.00  | 0.00  |
| BSU24410,spoIIAC | 2535952 | 2536158 | 0.00  | 0.00  | 0.00  |
| BSU24420,spoIIAB | 2536181 | 2536696 | 0.08  | 0.08  | 1.05  |
| BSU24430,spoIIAA | 2536690 | 2537613 | 0.06  | 0.08  | 1.21  |
| BSU24440,yqhV    | 2537689 | 2537970 | 0.07  | 0.05  | 0.73  |
| BSU24450,efp     | 2538115 | 2538672 | 68.94 | 50.37 | 0.73  |
| BSU24460,yqhT    | 2538697 | 2539758 | 17.26 | 17.90 | 1.04  |
| BSU24470,yqhS    | 2539755 | 2540201 | 7.65  | 11.37 | 1.49  |
| BSU24480,yqhR    | 2540288 | 2540824 | 0.12  | 0.09  | 0.75  |
| BSU24490,yqhQ    | 2541051 | 2542007 | 8.14  | 8.43  | 1.04  |
| BSU24500,yqhP    | 2542047 | 2542442 | 13.85 | 14.45 | 1.04  |
| BSU24510,yqhO    | 2542439 | 2543314 | 1.14  | 1.32  | 1.16  |
| BSU24520,mntR    | 2543440 | 2543868 | 12.42 | 12.93 | 1.04  |
| BSU24530,yqhM    | 2543968 | 2544804 | 2.82  | 5.27  | 1.87  |
| BSU24540,yqhL    | 2544995 | 2545375 | 17.58 | 15.01 | 0.85  |
| BSU24550,gcvPB   | 2545410 | 2546876 | 5.30  | 13.73 | 2.59  |
| BSU24560,gcvPA   | 2546869 | 2548215 | 4.96  | 13.73 | 2.77  |
| BSU24570,gcvT    | 2548245 | 2549333 | 3.36  | 8.53  | 2.54  |
| BSU24580,yqhH    | 2549775 | 2551448 | 0.19  | 0.20  | 1.10  |
| BSU24590,yqhG    | 2551469 | 2552263 | 0.49  | 0.98  | 2.00  |
| BSU24600,sinI    | 2552446 | 2552619 | 5.60  | 6.33  | 1.13  |
| BSU24610,sinR    | 2552653 | 2552988 | 9.67  | 14.06 | 1.45  |
| BSU24620,tasA    | 2553081 | 2553866 | 25.36 | 7.07  | 0.28  |
| BSU24630,sipW    | 2553930 | 2554502 | 14.17 | 4.08  | 0.29  |
| BSU24640,yqxM    | 2554486 | 2555247 | 6.22  | 1.78  | 0.29  |
| BSU24650,yqzG    | 2555519 | 2555845 | 0.29  | 0.33  | 1.13  |
| BSU24660,yqzE    | 2555887 | 2556066 | 0.37  | 0.69  | 1.85  |
| BSU24670,comGG   | 2556137 | 2556511 | 0.10  | 0.21  | 2.09  |
| BSU24680,comGF   | 2556512 | 2556895 | 0.06  | 0.12  | 1.88  |
| BSU24690,comGE   | 2556921 | 2557268 | 0.08  | 0.14  | 1.69  |
| BSU24700,comGD   | 2557252 | 2557683 | 0.07  | 0.15  | 2.24  |
| BSU24710,comGC   | 2557673 | 2557969 | 0.08  | 0.23  | 2.88  |
| BSU24720,comGB   | 2557983 | 2558954 | 0.07  | 0.18  | 2.77  |
| BSU24730,comGA   | 2559007 | 2560077 | 0.08  | 0.27  | 3.27  |
| BSU24740,yqxL    | 2560489 | 2561442 | 0.06  | 0.11  | 1.76  |
| BSU24750,yqhB    | 2561585 | 2562913 | 0.07  | 0.22  | 3.22  |
| BSU24760,rsbRD   | 2562966 | 2563802 | 0.39  | 3.01  | 7.65  |
| BSU24770,mgsR    | 2564026 | 2564406 | 0.46  | 8.94  | 19.34 |
| BSU24780,yqgY    | 2564638 | 2564883 | 8.26  | 6.74  | 0.82  |
| BSU24790,yqgX    | 2564923 | 2565558 | 2.86  | 4.71  | 1.64  |
| BSU24800,yqgW    | 2565715 | 2565888 | 11.49 | 6.22  | 0.54  |
| BSU24810,yqgV    | 2565920 | 2566234 | 20.32 | 30.95 | 1.52  |

|                |         |         |       |       |      |
|----------------|---------|---------|-------|-------|------|
| BSU24820,yqgU  | 2566237 | 2567298 | 5.05  | 6.24  | 1.24 |
| BSU24830,yqgT  | 2567360 | 2568490 | 1.79  | 2.24  | 1.25 |
| BSU24840,yqgS  | 2568573 | 2570489 | 18.28 | 11.95 | 0.65 |
| BSU24850,glcK  | 2570606 | 2571571 | 10.58 | 5.54  | 0.52 |
| BSU24860,yqgQ  | 2571582 | 2571797 | 6.72  | 4.46  | 0.66 |
| BSU24870,glpG  | 2571907 | 2573430 | 5.34  | 5.81  | 1.09 |
| BSU24880,yqgO  | 2573520 | 2573693 | 1.91  | 5.12  | 2.67 |
| BSU24890,yqgN  | 2573760 | 2574323 | 1.91  | 5.28  | 2.77 |
| BSU24900,rpmG  | 2574408 | 2574557 | 80.66 | 40.09 | 0.50 |
| BSU24910,yqgM  | 2574641 | 2575720 | 0.88  | 1.29  | 1.46 |
| BSU24920,yqgL  | 2575717 | 2576187 | 0.53  | 1.27  | 2.38 |
| BSU24930,yqzD  | 2576367 | 2576720 | 13.42 | 9.89  | 0.74 |
| BSU24940,yqzC  | 2576717 | 2577181 | 26.93 | 14.13 | 0.52 |
| BSU24950,pstBB | 2577210 | 2577992 | 5.06  | 3.45  | 0.68 |
| BSU24960,pstBA | 2578003 | 2578812 | 4.80  | 3.16  | 0.66 |
| BSU24970,pstA  | 2578833 | 2579717 | 3.70  | 2.25  | 0.61 |
| BSU24980,pstC  | 2579717 | 2580646 | 3.62  | 2.37  | 0.65 |
| BSU24990,pstS  | 2580715 | 2581617 | 2.36  | 1.39  | 0.59 |
| BSU25000,pbpA  | 2581771 | 2583921 | 11.71 | 7.41  | 0.63 |
| BSU25010,yqgE  | 2584035 | 2585327 | 0.16  | 1.14  | 7.09 |
| BSU25020,sodA  | 2585434 | 2586042 | 50.98 | 90.59 | 1.78 |
| BSU25030,yqgC  | 2586221 | 2586703 | 4.45  | 5.67  | 1.27 |
| BSU25040,yqgB  | 2586813 | 2587580 | 6.72  | 15.76 | 2.34 |
| BSU25050,yqgA  | 2587996 | 2588424 | 33.13 | 60.41 | 1.82 |
| BSU25060,yqfZ  | 2588701 | 2589000 | 0.28  | 0.65  | 2.33 |
| BSU25070,ispG  | 2589123 | 2590256 | 17.65 | 14.65 | 0.83 |
| BSU25080,yqfX  | 2590282 | 2590671 | 1.39  | 2.87  | 2.06 |
| BSU25090,yqfW  | 2590804 | 2591385 | 9.81  | 10.13 | 1.03 |
| BSU25100,zur   | 2591428 | 2591865 | 15.78 | 14.13 | 0.90 |
| BSU25110,yqfU  | 2592003 | 2592884 | 1.10  | 1.68  | 1.52 |
| BSU25120,yqfT  | 2593000 | 2593254 | 0.22  | 0.42  | 1.93 |
| BSU25130,yqfS  | 2593281 | 2594174 | 25.62 | 17.05 | 0.67 |
| BSU25140,cshB  | 2594184 | 2595500 | 8.57  | 5.02  | 0.59 |
| BSU25150,yqfQ  | 2595669 | 2596412 | 0.13  | 0.16  | 1.17 |
| BSU25160,ispH  | 2596535 | 2597479 | 7.17  | 3.86  | 0.54 |
| BSU25170,yqfO  | 2597502 | 2598623 | 16.92 | 9.25  | 0.55 |
| BSU25180,rmkK  | 2598616 | 2599266 | 11.52 | 5.49  | 0.48 |
| BSU25190,cccA  | 2599523 | 2599885 | 0.81  | 0.45  | 0.55 |
| BSU25200,sigA  | 2600214 | 2601329 | 38.09 | 28.28 | 0.74 |
| BSU25210,dnaG  | 2601528 | 2603339 | 28.27 | 20.11 | 0.71 |
| BSU25220,antE  | 2602979 | 2603275 | 33.21 | 24.02 | 0.72 |
| BSU25230,yqxD  | 2603373 | 2603867 | 21.17 | 14.62 | 0.69 |
| BSU25240,yqfL  | 2604121 | 2604933 | 4.56  | 7.50  | 1.64 |
| BSU25250,ccpN  | 2604959 | 2605597 | 3.31  | 6.03  | 1.83 |
| BSU25260,glyS  | 2605730 | 2607769 | 15.91 | 13.22 | 0.83 |
| BSU25270,glyQ  | 2607762 | 2608649 | 11.98 | 10.73 | 0.90 |
| BSU25280,recO  | 2608946 | 2609713 | 21.40 | 35.71 | 1.67 |

|                 |         |         |        |        |      |
|-----------------|---------|---------|--------|--------|------|
| BSU25289,yqzL   | 2609750 | 2609893 | 48.52  | 53.94  | 1.11 |
| BSU25290,era    | 2610041 | 2610946 | 24.79  | 24.26  | 0.98 |
| BSU25300,cdd    | 2610927 | 2611337 | 13.46  | 13.34  | 0.99 |
| BSU25310,dgkA   | 2611456 | 2611827 | 15.78  | 12.83  | 0.81 |
| BSU25320,yqfG   | 2611808 | 2612281 | 20.27  | 15.49  | 0.76 |
| BSU25330,yqfF   | 2612282 | 2614417 | 7.10   | 5.22   | 0.74 |
| BSU25340,phoH   | 2614496 | 2615455 | 18.56  | 13.85  | 0.75 |
| BSU25350,yqfD   | 2615452 | 2616648 | 0.57   | 0.60   | 1.04 |
| BSU25360,yqfC   | 2616667 | 2616948 | 0.14   | 0.15   | 1.07 |
| BSU25370,yqfB   | 2617005 | 2617424 | 20.76  | 24.60  | 1.18 |
| BSU25380,yqfA   | 2617449 | 2618444 | 18.18  | 21.74  | 1.20 |
| BSU25390,yqeZ   | 2618466 | 2619779 | 9.58   | 13.73  | 1.43 |
| BSU25400,yqeY   | 2619910 | 2620356 | 385.69 | 364.43 | 0.94 |
| BSU25410,rpsU   | 2620371 | 2620544 | 609.41 | 578.61 | 0.95 |
| BSU25420,yqeW   | 2620717 | 2621640 | 0.26   | 0.55   | 2.14 |
| BSU25430,rimO   | 2621677 | 2623032 | 61.79  | 29.68  | 0.48 |
| BSU25440,yqeU   | 2623032 | 2623802 | 40.18  | 56.28  | 1.40 |
| BSU25450,prmA   | 2623825 | 2624760 | 20.43  | 23.07  | 1.13 |
| BSU25460,dnaJ   | 2624785 | 2625912 | 21.23  | 14.15  | 0.67 |
| BSU25470,dnaK   | 2626112 | 2627947 | 55.75  | 48.84  | 0.88 |
| BSU25480,grpE   | 2627971 | 2628534 | 34.31  | 35.31  | 1.03 |
| BSU25490,hrcA   | 2628606 | 2629637 | 21.20  | 15.73  | 0.74 |
| BSU25500,hemN   | 2629718 | 2630857 | 5.92   | 2.39   | 0.40 |
| BSU25510,lepA   | 2630910 | 2632748 | 53.14  | 21.66  | 0.41 |
| BSU25520,yqxA   | 2632882 | 2633220 | 0.65   | 0.60   | 0.91 |
| BSU25530,spolIP | 2633237 | 2634442 | 0.61   | 0.49   | 0.81 |
| BSU25540,gpr    | 2634505 | 2635611 | 0.39   | 0.40   | 1.02 |
| BSU25550,rpsT   | 2635815 | 2636081 | 204.85 | 171.95 | 0.84 |
| BSU25560,holA   | 2636096 | 2637139 | 5.63   | 3.91   | 0.69 |
| BSU25569,yqzM   | 2637369 | 2637503 | 15.13  | 18.84  | 1.24 |
| BSU25570,comEC  | 2637543 | 2639873 | 0.59   | 0.74   | 1.26 |
| BSU25580,comEB  | 2639877 | 2640446 | 4.07   | 3.11   | 0.76 |
| BSU25590,comEA  | 2640513 | 2641130 | 0.10   | 0.17   | 1.70 |
| BSU25600,comER  | 2641214 | 2642035 | 0.20   | 0.32   | 1.58 |
| BSU25610,yqeM   | 2642101 | 2642844 | 53.43  | 30.84  | 0.58 |
| BSU25620,yqeL   | 2642841 | 2643197 | 60.18  | 35.13  | 0.58 |
| BSU25630,yqeK   | 2643215 | 2643775 | 22.66  | 11.60  | 0.51 |
| BSU25640,nadD   | 2643765 | 2644334 | 19.81  | 8.85   | 0.45 |
| BSU25650,yqel   | 2644346 | 2644636 | 22.10  | 10.55  | 0.48 |
| BSU25660,aroE   | 2644630 | 2645472 | 22.43  | 10.99  | 0.49 |
| BSU25670,yqeH   | 2645490 | 2646590 | 17.24  | 9.12   | 0.53 |
| BSU25680,yqeG   | 2646594 | 2647112 | 13.25  | 7.93   | 0.60 |
| BSU25690,sda    | 2647456 | 2647614 | 11.89  | 86.61  | 7.28 |
| BSU25700,yqeF   | 2647920 | 2648651 | 4.13   | 4.56   | 1.11 |
| BSU25710,cwlH   | 2648903 | 2649655 | 0.23   | 0.15   | 0.66 |
| BSU25720,yqeD   | 2649842 | 2650468 | 1.02   | 0.63   | 0.62 |
| BSU25730,yqeC   | 2650487 | 2651380 | 0.31   | 0.25   | 0.82 |

|                  |         |         |      |      |      |
|------------------|---------|---------|------|------|------|
| BSU25740,yqeB    | 2651632 | 2652354 | 6.72 | 3.24 | 0.48 |
| BSU25750,nucB    | 2652387 | 2652797 | 0.41 | 0.33 | 0.80 |
| BSU25770,spolVCA | 2653371 | 2654873 | 0.00 | 0.00 | 0.00 |
| BSU25780,arsC    | 2655322 | 2655741 | 0.00 | 0.00 | 0.00 |
| BSU25790,arsB    | 2655753 | 2656793 | 0.00 | 0.00 | 0.00 |
| BSU25800,yqcK    | 2656816 | 2657256 | 0.00 | 0.00 | 0.00 |
| BSU25810,arsR    | 2657317 | 2657634 | 0.00 | 0.00 | 0.00 |
| BSU25820,yqcl    | 2658006 | 2658770 | 0.00 | 0.00 | 0.00 |
| BSU25830,rapE    | 2659213 | 2660340 | 0.00 | 0.00 | 0.00 |
| BSU25840,phrE    | 2660330 | 2660464 | 0.00 | 0.00 | 0.00 |
| BSU25850,yqzI    | 2660574 | 2660732 | 0.00 | 0.00 | 0.00 |
| BSU25860,yqcG    | 2661102 | 2662697 | 0.00 | 0.00 | 0.00 |
| BSU25870,yqcF    | 2662712 | 2663290 | 0.00 | 0.00 | 0.00 |
| BSU25880,yqxJ    | 2663551 | 2663913 | 0.00 | 0.00 | 0.00 |
| BSU25890,yqxI    | 2663929 | 2664408 | 0.00 | 0.00 | 0.00 |
| BSU25900,cwlA    | 2664573 | 2665391 | 0.00 | 0.00 | 0.00 |
| BSU25910,yqxH    | 2665436 | 2665858 | 0.00 | 0.00 | 0.00 |
| BSU25920,yqxG    | 2665903 | 2666796 | 0.00 | 0.00 | 0.00 |
| BSU25930,yqcE    | 2666884 | 2667048 | 0.00 | 0.00 | 0.00 |
| BSU25940,yqcD    | 2667045 | 2667380 | 0.00 | 0.00 | 0.00 |
| BSU25950,yqcC    | 2667390 | 2668490 | 0.00 | 0.00 | 0.00 |
| BSU25960,yqcB    | 2668493 | 2668765 | 0.00 | 0.00 | 0.00 |
| BSU25970,yqcA    | 2668762 | 2669340 | 0.00 | 0.00 | 0.00 |
| BSU25980,yqbT    | 2669324 | 2670370 | 0.00 | 0.00 | 0.00 |
| BSU25990,yqbS    | 2670363 | 2670788 | 0.00 | 0.00 | 0.00 |
| BSU26000,yqbR    | 2670801 | 2671064 | 0.00 | 0.00 | 0.00 |
| BSU26010,yqbQ    | 2671061 | 2672041 | 0.00 | 0.00 | 0.00 |
| BSU26020,yqbP    | 2672054 | 2672713 | 0.00 | 0.00 | 0.00 |
| BSU26030,yqbO    | 2672706 | 2677463 | 0.00 | 0.00 | 0.00 |
| BSU26050,yqdB    | 2678240 | 2678419 | 0.00 | 0.00 | 0.00 |
| BSU26060,yqbM    | 2679142 | 2679585 | 0.00 | 0.00 | 0.00 |
| BSU26075,yqbK    | 2679588 | 2680988 | 0.00 | 0.00 | 0.00 |
| BSU26089,yqzN    | 2680989 | 2681180 | 0.00 | 0.00 | 0.00 |
| BSU26090,yqbJ    | 2681177 | 2681614 | 0.00 | 0.00 | 0.00 |
| BSU26100,yqbI    | 2681627 | 2682130 | 0.00 | 0.00 | 0.00 |
| BSU26110,yqbH    | 2682127 | 2682489 | 0.00 | 0.00 | 0.00 |
| BSU26120,yqbG    | 2682486 | 2682881 | 0.00 | 0.00 | 0.00 |
| BSU26130,yqbF    | 2682885 | 2683196 | 0.00 | 0.00 | 0.00 |
| BSU26140,yqbE    | 2683207 | 2684142 | 0.00 | 0.00 | 0.00 |
| BSU26150,yqbD    | 2684161 | 2685129 | 0.00 | 0.00 | 0.00 |
| BSU26160,yqbC    | 2685162 | 2685815 | 0.00 | 0.00 | 0.00 |
| BSU26170,yqbB    | 2685856 | 2686773 | 0.00 | 0.00 | 0.00 |
| BSU26180,yqbA    | 2686770 | 2688302 | 0.00 | 0.00 | 0.00 |
| BSU26190,yqaT    | 2688306 | 2689601 | 0.00 | 0.00 | 0.00 |
| BSU26200,yqaS    | 2689594 | 2690313 | 0.00 | 0.00 | 0.00 |
| BSU26210,yqaR    | 2690381 | 2690845 | 0.00 | 0.00 | 0.00 |
| BSU26220,yqaQ    | 2690989 | 2691444 | 0.00 | 0.00 | 0.00 |

|               |         |         |      |      |      |
|---------------|---------|---------|------|------|------|
| BSU26230,yqaP | 2691642 | 2692571 | 0.00 | 0.00 | 0.00 |
| BSU26240,yqaO | 2692645 | 2692851 | 0.00 | 0.00 | 0.00 |
| BSU26250,yqaN | 2692933 | 2693361 | 0.00 | 0.00 | 0.00 |
| BSU26259,yqzO | 2693457 | 2693606 | 0.00 | 0.00 | 0.00 |
| BSU26260,yqaM | 2693597 | 2694457 | 0.00 | 0.00 | 0.00 |
| BSU26270,yqaL | 2694420 | 2695097 | 0.00 | 0.00 | 0.00 |
| BSU26280,yqaK | 2695173 | 2696027 | 0.00 | 0.00 | 0.00 |
| BSU26290,yqaJ | 2696030 | 2696989 | 0.00 | 0.00 | 0.00 |
| BSU26300,yqaI | 2697095 | 2697289 | 0.00 | 0.00 | 0.00 |
| BSU26310,yqaH | 2697419 | 2697676 | 0.00 | 0.00 | 0.00 |
| BSU26320,yqaG | 2697673 | 2698242 | 0.00 | 0.00 | 0.00 |
| BSU26330,yqdA | 2698316 | 2698456 | 0.00 | 0.00 | 0.00 |
| BSU26340,yqaF | 2698486 | 2698716 | 0.00 | 0.00 | 0.00 |
| BSU26350,yqaE | 2698893 | 2699243 | 0.00 | 0.00 | 0.00 |
| BSU26360,yqaD | 2699510 | 2699677 | 0.00 | 0.00 | 0.00 |
| BSU26370,yqaC | 2700033 | 2700569 | 0.00 | 0.00 | 0.00 |
| BSU26380,yqaB | 2700838 | 2701356 | 0.00 | 0.00 | 0.00 |
| BSU26400,yrkS | 2701979 | 2702143 | 0.28 | 0.41 | 1.45 |
| BSU26410,yrkR | 2702688 | 2703104 | 0.63 | 1.44 | 2.30 |
| BSU26420,yrkQ | 2703150 | 2704448 | 0.62 | 1.42 | 2.29 |
| BSU26430,yrkP | 2704435 | 2705130 | 0.40 | 0.90 | 2.23 |
| BSU26440,yrkO | 2705398 | 2706615 | 1.24 | 4.37 | 3.53 |
| BSU26450,yrkN | 2707127 | 2707684 | 1.96 | 7.88 | 4.02 |
| BSU26470,yrkL | 2708175 | 2708699 | 1.48 | 3.15 | 2.12 |
| BSU26480,yrkK | 2708943 | 2709419 | 0.85 | 2.61 | 3.06 |
| BSU26490,yrkJ | 2710002 | 2710787 | 0.11 | 0.20 | 1.78 |
| BSU26500,yrkI | 2710848 | 2711075 | 1.01 | 0.53 | 0.53 |
| BSU26510,yrkH | 2711109 | 2712242 | 0.90 | 0.37 | 0.41 |
| BSU26530,yrkF | 2712577 | 2713134 | 0.71 | 0.30 | 0.43 |
| BSU26540,yrkE | 2713320 | 2713802 | 0.57 | 0.21 | 0.36 |
| BSU26550,yrkD | 2713949 | 2714140 | 2.89 | 4.73 | 1.64 |
| BSU26560,yrkC | 2714933 | 2715493 | 1.56 | 1.17 | 0.75 |
| BSU26570,yrkB | 2715719 | 2715865 | 0.57 | 0.47 | 0.82 |
| BSU26580,bltR | 2716035 | 2716856 | 0.10 | 0.15 | 1.58 |
| BSU26590,blt  | 2716973 | 2718175 | 1.25 | 0.46 | 0.37 |
| BSU26600,bltD | 2718344 | 2718802 | 1.70 | 0.78 | 0.46 |
| BSU26610,yrkA | 2718959 | 2720263 | 1.72 | 1.40 | 0.81 |
| BSU26619,yrzO | 2720526 | 2720669 | 0.41 | 0.28 | 0.67 |
| BSU26620,yrdR | 2720687 | 2721652 | 0.28 | 0.16 | 0.57 |
| BSU26630,yrdQ | 2721778 | 2722644 | 0.81 | 0.59 | 0.73 |
| BSU26640,yrdP | 2722767 | 2723804 | 0.25 | 0.59 | 2.36 |
| BSU26650,czcD | 2723892 | 2724827 | 0.21 | 0.59 | 2.76 |
| BSU26660,yrdN | 2725114 | 2725503 | 0.29 | 0.41 | 1.39 |
| BSU26670,gltr | 2725837 | 2726727 | 1.56 | 1.29 | 0.83 |
| BSU26680,yrdK | 2726885 | 2727163 | 2.64 | 1.85 | 0.70 |
| BSU26690,brnQ | 2727160 | 2728482 | 1.11 | 0.86 | 0.78 |
| BSU26700,azlD | 2728647 | 2728979 | 1.30 | 1.16 | 0.89 |

|               |         |         |       |       |      |
|---------------|---------|---------|-------|-------|------|
| BSU26710,azlC | 2728976 | 2729740 | 0.70  | 0.66  | 0.95 |
| BSU26720,azlB | 2729753 | 2730226 | 0.47  | 0.67  | 1.44 |
| BSU26730,yrdF | 2730560 | 2730835 | 0.06  | 0.18  | 2.93 |
| BSU26740,cypA | 2731107 | 2732339 | 0.13  | 0.15  | 1.20 |
| BSU26760,yrdC | 2732980 | 2733543 | 0.68  | 1.84  | 2.71 |
| BSU26770,yrdB | 2733772 | 2734143 | 0.17  | 1.14  | 6.83 |
| BSU26780,yrdA | 2734953 | 2735456 | 4.67  | 4.43  | 0.95 |
| BSU26790,aadK | 2735682 | 2736536 | 1.22  | 2.52  | 2.07 |
| BSU26800,yrpB | 2736915 | 2737958 | 0.78  | 2.66  | 3.43 |
| BSU26810,yrpC | 2738308 | 2739105 | 1.47  | 2.07  | 1.41 |
| BSU26820,yrpD | 2739486 | 2740193 | 4.66  | 3.58  | 0.77 |
| BSU26830,yrpE | 2741357 | 2742112 | 0.10  | 0.10  | 1.00 |
| BSU26840,sigZ | 2742244 | 2742774 | 0.15  | 0.24  | 1.60 |
| BSU26850,yrpG | 2742909 | 2743889 | 0.09  | 0.12  | 1.36 |
| BSU26860,yraO | 2744163 | 2745479 | 0.71  | 0.66  | 0.94 |
| BSU26870,yraN | 2745594 | 2746463 | 0.06  | 0.18  | 3.06 |
| BSU26880,yraM | 2746608 | 2747711 | 0.30  | 0.28  | 0.93 |
| BSU26890,csn  | 2747984 | 2748817 | 1.08  | 0.70  | 0.64 |
| BSU26900,yraL | 2749260 | 2749523 | 2.43  | 4.20  | 1.72 |
| BSU26910,yraK | 2749660 | 2750475 | 0.28  | 0.45  | 1.61 |
| BSU26920,yraJ | 2750883 | 2751239 | 0.74  | 1.23  | 1.65 |
| BSU26930,yraI | 2751292 | 2751726 | 0.18  | 0.32  | 1.78 |
| BSU26940,yraH | 2752167 | 2752553 | 0.26  | 0.40  | 1.55 |
| BSU26950,yraG | 2752802 | 2753047 | 0.23  | 0.23  | 1.02 |
| BSU26960,yraF | 2753065 | 2753433 | 0.25  | 0.33  | 1.32 |
| BSU26970,adhB | 2753452 | 2754588 | 0.11  | 0.17  | 1.55 |
| BSU26980,yraE | 2754607 | 2754804 | 0.22  | 0.37  | 1.72 |
| BSU26990,yraD | 2754820 | 2755119 | 0.24  | 0.38  | 1.60 |
| BSU27000,yraB | 2755382 | 2755804 | 0.39  | 0.35  | 0.89 |
| BSU27010,adhA | 2756312 | 2757361 | 0.35  | 0.37  | 1.07 |
| BSU27020,yraA | 2757492 | 2758001 | 7.21  | 11.36 | 1.58 |
| BSU27030,sacC | 2758043 | 2760076 | 0.39  | 0.68  | 1.76 |
| BSU27040,levG | 2760233 | 2761060 | 0.23  | 0.36  | 1.56 |
| BSU27050,levF | 2761081 | 2761890 | 0.19  | 0.33  | 1.79 |
| BSU27060,levE | 2761907 | 2762395 | 0.23  | 0.40  | 1.77 |
| BSU27070,levD | 2762395 | 2762835 | 0.16  | 0.32  | 2.04 |
| BSU27080,levR | 2763025 | 2765832 | 0.74  | 0.82  | 1.11 |
| BSU27090,aapA | 2766558 | 2767946 | 57.13 | 78.45 | 1.37 |
| BSU27100,yrhP | 2768042 | 2768674 | 2.63  | 5.00  | 1.90 |
| BSU27110,yrhO | 2768827 | 2769654 | 4.94  | 4.77  | 0.96 |
| BSU27120,sigV | 2769850 | 2770350 | 0.48  | 0.16  | 0.34 |
| BSU27130,rsiV | 2770350 | 2771207 | 0.68  | 0.28  | 0.41 |
| BSU27140,oatA | 2771318 | 2773222 | 1.79  | 0.79  | 0.44 |
| BSU27150,yrhK | 2773356 | 2773646 | 4.21  | 1.70  | 0.40 |
| BSU27160,cypB | 2773890 | 2777054 | 4.36  | 4.02  | 0.92 |
| BSU27170,bscR | 2777070 | 2777654 | 1.99  | 1.46  | 0.73 |
| BSU27180,yrhH | 2777877 | 2778419 | 3.14  | 1.39  | 0.44 |

|               |         |         |       |       |      |
|---------------|---------|---------|-------|-------|------|
| BSU27190,yrzI | 2778923 | 2779072 | 2.77  | 1.62  | 0.58 |
| BSU27200,yrhG | 2779462 | 2780262 | 1.63  | 1.20  | 0.73 |
| BSU27210,yrhF | 2780525 | 2780893 | 3.75  | 2.07  | 0.55 |
| BSU27220,yrhE | 2781209 | 2784151 | 5.79  | 3.14  | 0.54 |
| BSU27230,yrhD | 2784170 | 2784652 | 10.41 | 6.76  | 0.65 |
| BSU27240,yrhC | 2784688 | 2784918 | 6.01  | 6.40  | 1.06 |
| BSU27250,yrhB | 2785001 | 2786140 | 2.00  | 1.06  | 0.53 |
| BSU27260,mccA | 2786142 | 2787065 | 1.98  | 0.80  | 0.40 |
| BSU27270,mtn  | 2787130 | 2787825 | 10.15 | 5.77  | 0.57 |
| BSU27280,yrrT | 2787846 | 2788487 | 3.78  | 1.71  | 0.45 |
| BSU27290,yrzA | 2788680 | 2788883 | 1.48  | 1.27  | 0.86 |
| BSU27300,yrrS | 2788920 | 2789621 | 21.59 | 13.65 | 0.63 |
| BSU27310,pbpl | 2789686 | 2791440 | 0.54  | 0.51  | 0.93 |
| BSU27320,greA | 2791494 | 2791967 | 27.13 | 23.57 | 0.87 |
| BSU27330,udk  | 2792218 | 2792853 | 42.47 | 17.25 | 0.41 |
| BSU27340,yrrO | 2792860 | 2794128 | 35.63 | 13.11 | 0.37 |
| BSU27350,yrrN | 2794147 | 2795076 | 11.76 | 3.77  | 0.32 |
| BSU27360,yrrM | 2795082 | 2795735 | 7.34  | 2.16  | 0.29 |
| BSU27370,yrrL | 2795887 | 2796969 | 5.83  | 2.84  | 0.49 |
| BSU27380,yrzB | 2797100 | 2797381 | 53.46 | 49.48 | 0.93 |
| BSU27390,yrrK | 2797399 | 2797815 | 31.90 | 30.83 | 0.97 |
| BSU27400,yrzL | 2797823 | 2798089 | 34.17 | 32.79 | 0.96 |
| BSU27410,alaS | 2798174 | 2800810 | 18.25 | 13.74 | 0.75 |
| BSU27420,yrrI | 2801141 | 2802202 | 0.29  | 0.40  | 1.36 |
| BSU27430,glnQ | 2802358 | 2803086 | 0.16  | 0.19  | 1.19 |
| BSU27440,glnH | 2803108 | 2803929 | 0.06  | 0.04  | 0.79 |
| BSU27450,glnM | 2803990 | 2804640 | 0.00  | 0.00  | 0.00 |
| BSU27460,glnP | 2804657 | 2805313 | 0.08  | 0.06  | 0.70 |
| BSU27468,yrzQ | 2805348 | 2805479 | 1.97  | 2.25  | 1.14 |
| BSU27469,yrzR | 2805501 | 2805692 | 2.67  | 3.51  | 1.31 |
| BSU27470,yrrD | 2805704 | 2806228 | 1.07  | 1.87  | 1.74 |
| BSU27480,yrrC | 2806286 | 2808682 | 8.72  | 7.55  | 0.87 |
| BSU27490,yrrB | 2808707 | 2809327 | 4.36  | 2.27  | 0.52 |
| BSU27500,mnmA | 2809413 | 2810528 | 36.65 | 15.16 | 0.41 |
| BSU27510,iscS | 2810559 | 2811698 | 29.67 | 13.22 | 0.45 |
| BSU27520,cymR | 2811717 | 2812133 | 14.31 | 7.30  | 0.51 |
| BSU27530,yrvN | 2812336 | 2813601 | 1.78  | 1.95  | 1.10 |
| BSU27540,yrvM | 2813643 | 2814407 | 25.59 | 12.64 | 0.49 |
| BSU27550,aspS | 2814743 | 2816521 | 61.28 | 63.48 | 1.04 |
| BSU27560,hisS | 2816535 | 2817809 | 11.00 | 12.56 | 1.14 |
| BSU27570,yrzK | 2818191 | 2818361 | 1.51  | 0.99  | 0.65 |
| BSU27580,yrvJ | 2818494 | 2820050 | 2.71  | 3.45  | 1.27 |
| BSU27590,yrvI | 2820077 | 2820475 | 90.61 | 82.87 | 0.91 |
| BSU27600,relA | 2820529 | 2822733 | 58.95 | 57.07 | 0.97 |
| BSU27610,apt  | 2822901 | 2823413 | 41.11 | 14.66 | 0.36 |
| BSU27620,recJ | 2823419 | 2825779 | 26.02 | 8.99  | 0.35 |
| BSU27630,yrvD | 2825846 | 2826169 | 2.49  | 4.01  | 1.61 |



|                  |         |         |         |         |      |
|------------------|---------|---------|---------|---------|------|
| BSU27640,yrvC    | 2826245 | 2826742 | 2.32    | 3.06    | 1.32 |
| BSU27650,secDF   | 2826900 | 2829113 | 36.83   | 24.81   | 0.67 |
| BSU27660,comN    | 2829152 | 2829448 | 6.20    | 9.48    | 1.53 |
| BSU27670,spoVB   | 2829564 | 2831120 | 0.23    | 0.53    | 2.31 |
| BSU27680,yrbG    | 2831124 | 2831780 | 0.15    | 0.16    | 1.02 |
| BSU27690,yrzE    | 2831915 | 2832367 | 0.19    | 0.19    | 0.96 |
| BSU27700,yajC    | 2832424 | 2832690 | 32.65   | 55.93   | 1.71 |
| BSU27710,tgt     | 2832727 | 2833872 | 12.69   | 13.36   | 1.05 |
| BSU27720,queA    | 2833899 | 2834927 | 8.80    | 7.50    | 0.85 |
| BSU27729,yrzS    | 2834957 | 2835157 | 7.60    | 6.35    | 0.84 |
| BSU27730,ruvB    | 2835150 | 2836154 | 9.30    | 7.34    | 0.79 |
| BSU27740,ruvA    | 2836165 | 2836770 | 3.23    | 3.52    | 1.09 |
| BSU27750,bofC    | 2836909 | 2837421 | 2.47    | 1.10    | 0.44 |
| BSU27760,csbX    | 2837469 | 2838776 | 8.12    | 3.01    | 0.37 |
| BSU27770,yrbE    | 2838847 | 2839872 | 37.15   | 20.32   | 0.55 |
| BSU27785,yrzF    | 2840110 | 2840757 | 1.15    | 1.91    | 1.66 |
| BSU27800,yrzH    | 2841169 | 2841300 | 3.15    | 3.18    | 1.01 |
| BSU27809,yrzT    | 2841307 | 2841447 | 2.41    | 2.37    | 0.98 |
| BSU27810,yrbD    | 2841611 | 2843065 | 5.49    | 2.22    | 0.40 |
| BSU27820,yrbC    | 2843106 | 2843828 | 0.36    | 0.30    | 0.84 |
| BSU27830,coxA    | 2843931 | 2844527 | 0.17    | 0.47    | 2.75 |
| BSU27840,safA    | 2844675 | 2845838 | 0.24    | 0.31    | 1.27 |
| BSU27850,nadA    | 2845955 | 2847061 | 0.14    | 0.15    | 1.04 |
| BSU27860,nadC    | 2847048 | 2847917 | 0.07    | 0.08    | 1.19 |
| BSU27870,nadB    | 2847871 | 2849466 | 0.10    | 0.09    | 0.95 |
| BSU27880,nifS    | 2849569 | 2850756 | 1.21    | 1.53    | 1.27 |
| BSU27890,nadR    | 2850716 | 2851258 | 11.30   | 12.80   | 1.13 |
| BSU27900,pheA    | 2851283 | 2852140 | 5.61    | 4.88    | 0.87 |
| BSU27910,pheB    | 2852157 | 2852600 | 6.71    | 6.41    | 0.96 |
| BSU27920,obgE    | 2852661 | 2853947 | 49.25   | 32.25   | 0.65 |
| BSU27930,spo0B   | 2853981 | 2854559 | 30.78   | 23.02   | 0.75 |
| BSU27940,rpmA    | 2854880 | 2855164 | 2504.05 | 3856.60 | 1.54 |
| BSU27950,ysxB    | 2855177 | 2855515 | 2672.97 | 2557.73 | 0.96 |
| BSU27960,rplU    | 2855518 | 2855826 | 1116.34 | 657.15  | 0.59 |
| BSU27970,spoIVFB | 2855973 | 2856839 | 1.18    | 0.94    | 0.79 |
| BSU27980,spoIVFA | 2856832 | 2857626 | 1.05    | 0.88    | 0.84 |
| BSU27990,minD    | 2857776 | 2858582 | 69.31   | 34.86   | 0.50 |
| BSU28000,minC    | 2858584 | 2859264 | 65.21   | 29.05   | 0.45 |
| BSU28010,mreD    | 2859317 | 2859835 | 59.57   | 24.93   | 0.42 |
| BSU28020,mreC    | 2859832 | 2860704 | 81.78   | 36.69   | 0.45 |
| BSU28030,mreB    | 2860735 | 2861748 | 47.60   | 23.50   | 0.49 |
| BSU28040,radC    | 2861840 | 2862535 | 6.72    | 3.08    | 0.46 |
| BSU28050,maf     | 2862572 | 2863141 | 7.58    | 3.63    | 0.48 |
| BSU28060,spoIIB  | 2863294 | 2864292 | 0.11    | 0.20    | 1.75 |
| BSU28070,comC    | 2864426 | 2865172 | 0.20    | 0.21    | 1.03 |
| BSU28080,folC    | 2865312 | 2866604 | 10.46   | 12.94   | 1.24 |
| BSU28090,vals    | 2866664 | 2869306 | 25.48   | 25.20   | 0.99 |

|                 |         |         |        |        |       |
|-----------------|---------|---------|--------|--------|-------|
| BSU28099,yszA   | 2869754 | 2869945 | 0.42   | 0.32   | 0.76  |
| BSU28100,ysxE   | 2869964 | 2870989 | 0.36   | 1.30   | 3.66  |
| BSU28110,spoVID | 2871022 | 2872749 | 0.29   | 1.15   | 3.90  |
| BSU28120,hemL   | 2872880 | 2874172 | 47.05  | 39.22  | 0.83  |
| BSU28130,hemB   | 2874202 | 2875176 | 33.30  | 23.84  | 0.72  |
| BSU28140,hemD   | 2875173 | 2875961 | 14.24  | 10.27  | 0.72  |
| BSU28150,hemC   | 2875951 | 2876895 | 12.16  | 9.36   | 0.77  |
| BSU28160,hemX   | 2876928 | 2877758 | 11.90  | 10.06  | 0.85  |
| BSU28170,hemA   | 2877766 | 2879133 | 17.96  | 17.68  | 0.98  |
| BSU28180,ysxD   | 2879363 | 2879860 | 2.46   | 2.83   | 1.15  |
| BSU28190,engB   | 2879882 | 2880469 | 16.81  | 14.25  | 0.85  |
| BSU28200,lonA   | 2880466 | 2882790 | 9.90   | 9.28   | 0.94  |
| BSU28210,lonB   | 2882971 | 2884629 | 0.30   | 0.76   | 2.54  |
| BSU28220,clpX   | 2884781 | 2886043 | 61.95  | 75.70  | 1.22  |
| BSU28230,tig    | 2886315 | 2887589 | 109.50 | 67.40  | 0.62  |
| BSU28240,ysoA   | 2887817 | 2888821 | 4.04   | 5.83   | 1.45  |
| BSU28250,leuD   | 2888940 | 2889539 | 0.65   | 6.24   | 9.58  |
| BSU28260,leuC   | 2889552 | 2890970 | 0.61   | 6.88   | 11.20 |
| BSU28270,leuB   | 2891020 | 2892117 | 0.33   | 6.09   | 18.66 |
| BSU28280,leuA   | 2892138 | 2893694 | 2.29   | 7.06   | 3.08  |
| BSU28290,ilvC   | 2893681 | 2894709 | 0.67   | 8.10   | 12.08 |
| BSU28300,ilvH   | 2894733 | 2895251 | 0.23   | 4.74   | 20.68 |
| BSU28310,ilvB   | 2895248 | 2896972 | 0.28   | 6.15   | 22.12 |
| BSU28320,ysnD   | 2897788 | 2898123 | 0.09   | 0.09   | 0.93  |
| BSU28330,ysnE   | 2898292 | 2898747 | 0.59   | 0.55   | 0.92  |
| BSU28340,ysnF   | 2898931 | 2899752 | 0.24   | 1.93   | 7.93  |
| BSU28350,ysnB   | 2900020 | 2900529 | 5.75   | 10.00  | 1.74  |
| BSU28360,ysnA   | 2900545 | 2901141 | 6.48   | 11.07  | 1.71  |
| BSU28370,rph    | 2901154 | 2901891 | 3.16   | 5.66   | 1.79  |
| BSU28380,gerM   | 2902002 | 2903102 | 0.37   | 1.66   | 4.51  |
| BSU28390,racE   | 2903217 | 2904035 | 25.37  | 15.80  | 0.62  |
| BSU28400,ysmB   | 2904043 | 2904483 | 18.44  | 12.93  | 0.70  |
| BSU28410,gerE   | 2904727 | 2904951 | 4.00   | 8.97   | 2.24  |
| BSU28420,ysmA   | 2905067 | 2905510 | 1.27   | 4.17   | 3.28  |
| BSU28430,sdhB   | 2905571 | 2906332 | 91.54  | 138.55 | 1.51  |
| BSU28440,sdhA   | 2906335 | 2908095 | 57.50  | 89.12  | 1.55  |
| BSU28450,sdhC   | 2908129 | 2908737 | 18.56  | 21.92  | 1.18  |
| BSU28460,yslB   | 2909030 | 2909476 | 5.45   | 10.41  | 1.91  |
| BSU28470,lysC   | 2909520 | 2910746 | 20.40  | 17.50  | 0.86  |
| BSU28490,uvrC   | 2911116 | 2912888 | 1.83   | 1.86   | 1.02  |
| BSU28500,trxA   | 2913024 | 2913338 | 22.01  | 38.88  | 1.77  |
| BSU28510,xsa    | 2913661 | 2915148 | 7.38   | 2.83   | 0.38  |
| BSU28520,etfA   | 2915365 | 2916342 | 10.58  | 7.08   | 0.67  |
| BSU28530,etfB   | 2916378 | 2917151 | 9.92   | 6.34   | 0.64  |
| BSU28540,ysiB   | 2917166 | 2917942 | 8.23   | 5.36   | 0.65  |
| BSU28550,fadR   | 2917957 | 2918541 | 7.88   | 9.01   | 1.14  |
| BSU28560,lcfA   | 2918646 | 2920328 | 2.59   | 2.04   | 0.79  |

|                |         |         |        |        |      |
|----------------|---------|---------|--------|--------|------|
| BSU28570,yshE  | 2920517 | 2920921 | 7.21   | 6.20   | 0.86 |
| BSU28580,mutSB | 2920936 | 2923293 | 11.61  | 10.04  | 0.86 |
| BSU28590,yshC  | 2923314 | 2925026 | 8.77   | 6.57   | 0.75 |
| BSU28600,yshB  | 2925100 | 2925633 | 6.92   | 7.40   | 1.07 |
| BSU28610,yshA  | 2925640 | 2925897 | 6.22   | 7.63   | 1.23 |
| BSU28620,rnhC  | 2926031 | 2926972 | 5.15   | 4.34   | 0.84 |
| BSU28630,pheT  | 2927008 | 2929422 | 20.17  | 33.35  | 1.65 |
| BSU28640,pheS  | 2929438 | 2930472 | 6.26   | 6.97   | 1.11 |
| BSU28650,ysgA  | 2930827 | 2931573 | 14.58  | 12.19  | 0.84 |
| BSU28660,sspl  | 2931692 | 2931907 | 1.42   | 2.36   | 1.66 |
| BSU28670,yfbB  | 2931976 | 2933082 | 1.01   | 0.92   | 0.92 |
| BSU28680,glcD  | 2933185 | 2934597 | 3.64   | 2.01   | 0.55 |
| BSU28690,glcF  | 2934594 | 2935928 | 4.37   | 2.56   | 0.59 |
| BSU28700,yseE  | 2935967 | 2936209 | 18.31  | 10.82  | 0.59 |
| BSU28710,cstA  | 2936382 | 2938178 | 13.88  | 7.00   | 0.50 |
| BSU28720,abfA  | 2938330 | 2939832 | 1.94   | 1.25   | 0.64 |
| BSU28730,araQ  | 2939851 | 2940696 | 1.38   | 0.80   | 0.58 |
| BSU28740,araP  | 2940697 | 2941638 | 0.97   | 0.65   | 0.67 |
| BSU28750,araN  | 2941674 | 2942975 | 0.53   | 0.53   | 1.01 |
| BSU28760,araM  | 2943006 | 2944190 | 0.66   | 0.61   | 0.91 |
| BSU28770,araL  | 2944187 | 2945005 | 0.93   | 0.77   | 0.83 |
| BSU28780,araD  | 2944983 | 2945672 | 1.22   | 1.10   | 0.90 |
| BSU28790,araB  | 2945689 | 2947371 | 1.33   | 1.14   | 0.86 |
| BSU28800,araA  | 2947385 | 2948875 | 1.93   | 1.60   | 0.83 |
| BSU28810,abnA  | 2949053 | 2950024 | 2.13   | 0.68   | 0.32 |
| BSU28820,yseC  | 2950221 | 2951306 | 2.61   | 3.03   | 1.16 |
| BSU28830,yseB  | 2951490 | 2951882 | 2.20   | 2.47   | 1.13 |
| BSU28840,yseA  | 2951898 | 2952167 | 3.55   | 4.14   | 1.17 |
| BSU28850,rplT  | 2952224 | 2952583 | 213.28 | 155.05 | 0.73 |
| BSU28860,rplM  | 2952615 | 2952815 | 209.26 | 149.15 | 0.71 |
| BSU28870,infC  | 2952828 | 2953349 | 91.05  | 64.17  | 0.70 |
| BSU28890,yseB  | 2953795 | 2954460 | 0.80   | 0.24   | 0.30 |
| BSU28900,yseB  | 2954492 | 2955187 | 204.45 | 9.12   | 0.04 |
| BSU28910,yseA  | 2955209 | 2955649 | 26.10  | 1.83   | 0.07 |
| BSU28920,lytT  | 2955783 | 2956508 | 2.50   | 2.44   | 0.97 |
| BSU28930,lytS  | 2956486 | 2958267 | 2.04   | 2.13   | 1.05 |
| BSU28940,yseA  | 2958434 | 2959216 | 8.50   | 19.31  | 2.27 |
| BSU28950,thrS  | 2959257 | 2961188 | 25.91  | 17.56  | 0.68 |
| BSU28960,ytxC  | 2961586 | 2962431 | 18.64  | 11.94  | 0.64 |
| BSU28970,ytxB  | 2962510 | 2963151 | 19.22  | 12.32  | 0.64 |
| BSU28980,dnaI  | 2963185 | 2964120 | 14.17  | 8.98   | 0.63 |
| BSU28990,dnaB  | 2964148 | 2965566 | 6.49   | 4.50   | 0.69 |
| BSU29000,nrdR  | 2965681 | 2966139 | 6.83   | 12.35  | 1.81 |
| BSU29010,speD  | 2966413 | 2966793 | 74.71  | 36.89  | 0.49 |
| BSU29020,gapB  | 2967032 | 2968054 | 16.64  | 2.80   | 0.17 |
| BSU29030,ytcD  | 2968260 | 2968640 | 1.22   | 0.99   | 0.81 |
| BSU29040,ytbD  | 2968824 | 2970014 | 0.37   | 0.25   | 0.68 |

|               |         |         |        |        |      |
|---------------|---------|---------|--------|--------|------|
| BSU29050,ytbE | 2970038 | 2970880 | 0.52   | 0.49   | 0.93 |
| BSU29060,coaE | 2970922 | 2971515 | 21.34  | 17.50  | 0.82 |
| BSU29070,ytaF | 2971531 | 2972163 | 19.43  | 14.59  | 0.75 |
| BSU29080,mutM | 2972329 | 2973159 | 16.35  | 12.83  | 0.78 |
| BSU29090,polA | 2973182 | 2975824 | 9.65   | 6.89   | 0.71 |
| BSU29100,phoR | 2976068 | 2977807 | 21.60  | 30.55  | 1.41 |
| BSU29110,phoP | 2977800 | 2978522 | 3.48   | 4.24   | 1.22 |
| BSU29120,mdh  | 2978734 | 2979672 | 9.62   | 40.42  | 4.20 |
| BSU29130,icd  | 2979716 | 2980987 | 8.46   | 25.42  | 3.01 |
| BSU29140,citZ | 2981151 | 2982269 | 2.87   | 9.94   | 3.47 |
| BSU29150,ytwI | 2982603 | 2983067 | 7.08   | 8.60   | 1.21 |
| BSU29160,ytvI | 2983164 | 2984279 | 6.30   | 7.20   | 1.14 |
| BSU29170,fxsA | 2984312 | 2984695 | 50.34  | 45.12  | 0.90 |
| BSU29180,pyk  | 2984788 | 2986545 | 167.85 | 107.59 | 0.64 |
| BSU29190,pfkA | 2986588 | 2987547 | 27.99  | 16.67  | 0.60 |
| BSU29200,accA | 2987731 | 2988708 | 25.55  | 20.33  | 0.80 |
| BSU29210,accD | 2988693 | 2989565 | 25.47  | 17.94  | 0.70 |
| BSU29220,ytsJ | 2989900 | 2991132 | 40.13  | 35.80  | 0.89 |
| BSU29230,dnaE | 2991269 | 2994616 | 10.99  | 7.71   | 0.70 |
| BSU29239,ytrH | 2994756 | 2995097 | 0.27   | 0.22   | 0.80 |
| BSU29240,ytrI | 2995067 | 2995597 | 0.28   | 0.53   | 1.89 |
| BSU29249,ytzJ | 2995699 | 2995890 | 3.58   | 5.84   | 1.63 |
| BSU29250,nrnA | 2995908 | 2996849 | 14.66  | 18.86  | 1.29 |
| BSU29260,ytpI | 2996980 | 2997282 | 3.80   | 5.11   | 1.35 |
| BSU29270,ytoI | 2997301 | 2998620 | 4.51   | 4.94   | 1.10 |
| BSU29280,ytnM | 2998796 | 2999698 | 0.11   | 0.13   | 1.20 |
| BSU29290,ytnL | 2999717 | 3000967 | 0.12   | 0.12   | 1.07 |
| BSU29300,rbfK | 3000985 | 3001677 | 0.06   | 0.07   | 1.13 |
| BSU29310,ytnJ | 3001724 | 3003052 | 0.06   | 0.08   | 1.34 |
| BSU29320,ytnI | 3003049 | 3003330 | 0.09   | 0.07   | 0.80 |
| BSU29330,ytmO | 3003345 | 3004349 | 0.08   | 0.07   | 0.90 |
| BSU29340,tcyN | 3004346 | 3005125 | 0.05   | 0.06   | 1.13 |
| BSU29350,tcyM | 3005122 | 3005829 | 0.06   | 0.06   | 1.08 |
| BSU29360,tcyL | 3005859 | 3006578 | 0.08   | 0.10   | 1.24 |
| BSU29370,tcyK | 3006600 | 3007412 | 0.08   | 0.10   | 1.37 |
| BSU29380,tcyJ | 3007426 | 3008235 | 0.07   | 0.07   | 1.12 |
| BSU29390,ytml | 3008249 | 3008785 | 0.07   | 0.10   | 1.50 |
| BSU29400,ytII | 3008938 | 3009864 | 0.57   | 0.38   | 0.66 |
| BSU29410,ytkL | 3009915 | 3010598 | 24.90  | 30.11  | 1.21 |
| BSU29420,fabG | 3010661 | 3011428 | 1.79   | 2.40   | 1.34 |
| BSU29430,ytzD | 3011555 | 3011689 | 5.00   | 1.84   | 0.37 |
| BSU29440,argH | 3011751 | 3013136 | 9.84   | 3.33   | 0.34 |
| BSU29450,argG | 3013133 | 3014344 | 7.83   | 2.49   | 0.32 |
| BSU29460,moaB | 3014514 | 3015026 | 3.69   | 19.36  | 5.25 |
| BSU29470,ackA | 3015111 | 3016298 | 44.51  | 34.78  | 0.78 |
| BSU29480,ytxK | 3016646 | 3017635 | 11.63  | 10.40  | 0.89 |
| BSU29490,tpx  | 3017696 | 3018199 | 30.98  | 75.09  | 2.42 |

|               |         |         |        |        |      |
|---------------|---------|---------|--------|--------|------|
| BSU29500,ytfJ | 3018309 | 3018764 | 0.52   | 1.08   | 2.06 |
| BSU29510,ytfl | 3018778 | 3019458 | 0.18   | 0.23   | 1.31 |
| BSU29520,yteJ | 3019533 | 3020027 | 6.35   | 3.33   | 0.52 |
| BSU29530,sppA | 3020040 | 3021047 | 3.36   | 2.02   | 0.60 |
| BSU29540,ppnK | 3021233 | 3022036 | 4.30   | 6.25   | 1.45 |
| BSU29550,ytcJ | 3022068 | 3023657 | 17.24  | 16.69  | 0.97 |
| BSU29560,ytcl | 3023677 | 3025266 | 8.20   | 6.45   | 0.79 |
| BSU29570,sspA | 3025445 | 3025654 | 19.27  | 32.82  | 1.70 |
| BSU29580,ytbJ | 3025748 | 3026953 | 9.89   | 7.35   | 0.74 |
| BSU29590,iscS | 3026957 | 3028102 | 5.55   | 5.32   | 0.96 |
| BSU29600,braB | 3028297 | 3029634 | 5.66   | 5.39   | 0.95 |
| BSU29610,eZR  | 3029729 | 3031417 | 34.24  | 26.89  | 0.79 |
| BSU29620,hisJ | 3031614 | 3032420 | 7.70   | 14.43  | 1.87 |
| BSU29630,yttP | 3032417 | 3033040 | 11.60  | 18.67  | 1.61 |
| BSU29640,ytsP | 3033167 | 3033658 | 24.02  | 27.92  | 1.16 |
| BSU29650,ytrP | 3033696 | 3035435 | 20.54  | 13.48  | 0.66 |
| BSU29660,rpsD | 3035730 | 3036332 | 388.15 | 141.41 | 0.36 |
| BSU29670,tyrS | 3036603 | 3037871 | 10.37  | 7.93   | 0.76 |
| BSU29679,ytzK | 3038060 | 3038203 | 53.04  | 35.25  | 0.66 |
| BSU29680,acsA | 3038213 | 3039931 | 0.36   | 0.32   | 0.88 |
| BSU29690,acuA | 3040092 | 3040724 | 5.21   | 2.71   | 0.52 |
| BSU29700,acuB | 3040751 | 3041395 | 7.89   | 3.85   | 0.49 |
| BSU29710,acuC | 3041392 | 3042555 | 6.44   | 3.26   | 0.51 |
| BSU29720,ytxE | 3042566 | 3043294 | 0.32   | 1.08   | 3.33 |
| BSU29730,ytxD | 3043284 | 3044102 | 0.66   | 1.58   | 2.40 |
| BSU29740,ccpA | 3044165 | 3045169 | 85.04  | 52.96  | 0.62 |
| BSU29750,aroA | 3045445 | 3046521 | 53.50  | 147.76 | 2.76 |
| BSU29760,ytxJ | 3046757 | 3047083 | 14.54  | 34.19  | 2.35 |
| BSU29770,ytxH | 3047107 | 3047562 | 17.97  | 43.61  | 2.43 |
| BSU29780,ytxG | 3047593 | 3048015 | 5.84   | 13.48  | 2.31 |
| BSU29790,murC | 3048177 | 3049475 | 62.39  | 35.16  | 0.56 |
| BSU29805,ytpS | 3049725 | 3052583 | 12.32  | 8.27   | 0.67 |
| BSU29820,ytpR | 3052743 | 3053348 | 29.88  | 26.85  | 0.90 |
| BSU29830,ytpQ | 3053364 | 3054173 | 21.71  | 23.42  | 1.08 |
| BSU29840,ytpP | 3054188 | 3054511 | 21.59  | 25.76  | 1.19 |
| BSU29850,ytoQ | 3054746 | 3055192 | 2.38   | 3.07   | 1.29 |
| BSU29860,ytoP | 3055247 | 3056320 | 5.78   | 7.36   | 1.27 |
| BSU29870,ytzB | 3056479 | 3056796 | 4.74   | 11.07  | 2.34 |
| BSU29880,malS | 3056849 | 3058549 | 4.50   | 10.64  | 2.37 |
| BSU29890,ytnP | 3058631 | 3059401 | 2.26   | 4.88   | 2.15 |
| BSU29900,trmB | 3059547 | 3060188 | 9.04   | 6.09   | 0.67 |
| BSU29910,ytzH | 3060395 | 3060673 | 14.68  | 8.05   | 0.55 |
| BSU29920,ytmP | 3060674 | 3061288 | 20.10  | 11.18  | 0.56 |
| BSU29930,amyX | 3061651 | 3063807 | 1.83   | 1.33   | 0.73 |
| BSU29940,ytIR | 3063833 | 3064762 | 2.01   | 1.77   | 0.88 |
| BSU29950,ytIQ | 3064811 | 3065725 | 2.18   | 2.45   | 1.12 |
| BSU29960,ytIP | 3065751 | 3066302 | 1.80   | 2.10   | 1.17 |

|               |         |         |       |       |      |
|---------------|---------|---------|-------|-------|------|
| BSU29970,ytkP | 3066451 | 3067386 | 7.12  | 5.40  | 0.76 |
| BSU29980,ytjP | 3067420 | 3068811 | 5.01  | 4.72  | 0.94 |
| BSU29990,pbuO | 3068908 | 3070206 | 2.35  | 1.66  | 0.70 |
| BSU30000,ythQ | 3070246 | 3071403 | 1.89  | 1.47  | 0.78 |
| BSU30010,ythP | 3071400 | 3072110 | 1.98  | 1.85  | 0.94 |
| BSU30020,ytzE | 3072401 | 3072622 | 5.69  | 18.49 | 3.25 |
| BSU30035,ytzG | 3072743 | 3073462 | 5.27  | 5.48  | 1.04 |
| BSU30050,ytgP | 3073531 | 3075165 | 11.15 | 4.08  | 0.37 |
| BSU30060,ytfP | 3075367 | 3076629 | 2.95  | 2.63  | 0.89 |
| BSU30070,opuD | 3076818 | 3078356 | 9.72  | 6.98  | 0.72 |
| BSU30080,yteV | 3078393 | 3078575 | 0.37  | 0.39  | 1.06 |
| BSU30090,yteU | 3078643 | 3079311 | 0.42  | 0.36  | 0.85 |
| BSU30100,yteT | 3079333 | 3080619 | 0.23  | 0.15  | 0.66 |
| BSU30110,yteS | 3080631 | 3081134 | 0.15  | 0.10  | 0.66 |
| BSU30120,yteR | 3081131 | 3082243 | 0.12  | 0.08  | 0.62 |
| BSU30135,yteP | 3082260 | 3083225 | 0.08  | 0.05  | 0.57 |
| BSU30150,ytdP | 3083441 | 3085759 | 0.91  | 0.24  | 0.26 |
| BSU30160,ytcQ | 3085800 | 3087296 | 0.88  | 0.40  | 0.45 |
| BSU30170,ytcP | 3087321 | 3088181 | 0.75  | 0.33  | 0.44 |
| BSU30180,ytbQ | 3088388 | 3089149 | 0.40  | 0.36  | 0.91 |
| BSU30190,biol | 3089226 | 3090413 | 0.15  | 0.14  | 0.93 |
| BSU30200,bioB | 3090482 | 3091489 | 0.10  | 0.11  | 1.03 |
| BSU30210,bioD | 3091492 | 3092187 | 0.13  | 0.13  | 1.02 |
| BSU30220,bioF | 3092184 | 3093353 | 0.37  | 0.32  | 0.88 |
| BSU30230,bioA | 3093343 | 3094689 | 0.21  | 0.20  | 0.94 |
| BSU30240,bioW | 3094679 | 3095455 | 0.13  | 0.12  | 0.92 |
| BSU30250,ytaP | 3095665 | 3096564 | 0.16  | 0.25  | 1.50 |
| BSU30260,msmR | 3096782 | 3097816 | 1.36  | 1.49  | 1.10 |
| BSU30270,msmE | 3097850 | 3099130 | 0.26  | 0.24  | 0.92 |
| BSU30280,amyD | 3099123 | 3100034 | 0.30  | 0.26  | 0.87 |
| BSU30290,amyC | 3100031 | 3100861 | 0.27  | 0.28  | 1.03 |
| BSU30300,melA | 3100881 | 3102179 | 1.24  | 1.32  | 1.07 |
| BSU30310,ytwF | 3102201 | 3102512 | 5.51  | 8.89  | 1.61 |
| BSU30320,leuS | 3102629 | 3105043 | 38.06 | 22.96 | 0.60 |
| BSU30330,ytvB | 3105470 | 3105799 | 0.57  | 0.65  | 1.15 |
| BSU30340,ytvA | 3106210 | 3106995 | 2.46  | 3.02  | 1.23 |
| BSU30350,yttB | 3107232 | 3108425 | 2.20  | 0.71  | 0.32 |
| BSU30360,yttA | 3108614 | 3109360 | 0.55  | 1.88  | 3.42 |
| BSU30370,bceB | 3109397 | 3111337 | 1.09  | 0.89  | 0.82 |
| BSU30380,bceA | 3111327 | 3112088 | 0.82  | 0.66  | 0.81 |
| BSU30390,bceS | 3112190 | 3113194 | 6.02  | 4.46  | 0.74 |
| BSU30400,bceR | 3113187 | 3113882 | 3.77  | 3.48  | 0.92 |
| BSU30410,ytrF | 3113979 | 3115289 | 1.89  | 2.54  | 1.34 |
| BSU30420,ytrE | 3115279 | 3115974 | 1.48  | 2.04  | 1.38 |
| BSU30430,ytrD | 3115989 | 3116966 | 1.14  | 1.00  | 0.88 |
| BSU30440,ytrC | 3116996 | 3117982 | 1.24  | 1.08  | 0.87 |
| BSU30450,ytrB | 3117976 | 3118854 | 1.33  | 1.17  | 0.88 |

|                |         |         |        |        |      |
|----------------|---------|---------|--------|--------|------|
| BSU30460,ytrA  | 3118847 | 3119239 | 0.77   | 0.80   | 1.04 |
| BSU30470,ytzC  | 3119565 | 3119837 | 1.46   | 1.75   | 1.20 |
| BSU30480,ytqA  | 3119999 | 3120967 | 10.36  | 4.76   | 0.46 |
| BSU30490,ytqB  | 3120964 | 3121548 | 14.29  | 7.42   | 0.52 |
| BSU30500,ytpB  | 3121538 | 3122641 | 4.26   | 4.15   | 0.97 |
| BSU30510,ytpA  | 3122662 | 3123441 | 4.66   | 4.19   | 0.90 |
| BSU30520,ytoA  | 3123490 | 3124005 | 4.80   | 4.69   | 0.98 |
| BSU30530,ytnA  | 3124250 | 3125641 | 9.70   | 7.64   | 0.79 |
| BSU30540,asnB  | 3125777 | 3127675 | 92.99  | 51.29  | 0.55 |
| BSU30550,metK  | 3127825 | 3129027 | 257.67 | 121.34 | 0.47 |
| BSU30560,pckA  | 3129530 | 3131113 | 99.55  | 16.80  | 0.17 |
| BSU30570,ytmB  | 3131152 | 3131394 | 8.61   | 13.24  | 1.54 |
| BSU30580,ytmA  | 3131446 | 3132219 | 0.77   | 0.94   | 1.22 |
| BSU30595,ytIA  | 3132370 | 3133374 | 0.20   | 0.16   | 0.79 |
| BSU30610,ytIC  | 3133387 | 3134169 | 0.60   | 1.06   | 1.76 |
| BSU30620,ytID  | 3134144 | 3134956 | 0.76   | 0.92   | 1.21 |
| BSU30630,ytkD  | 3134983 | 3135459 | 6.71   | 9.25   | 1.38 |
| BSU30640,ytkC  | 3135668 | 3136072 | 0.13   | 0.14   | 1.03 |
| BSU30650,dps   | 3136238 | 3136675 | 6.10   | 14.59  | 2.39 |
| BSU30659,ytzI  | 3136768 | 3136944 | 5.40   | 7.15   | 1.32 |
| BSU30660,ytkA  | 3136938 | 3137375 | 2.25   | 3.05   | 1.36 |
| BSU30670,luxS  | 3137495 | 3137968 | 28.60  | 28.99  | 1.01 |
| BSU30680,ytjA  | 3138097 | 3138324 | 7.41   | 8.15   | 1.10 |
| BSU30690,ytiB  | 3138321 | 3138884 | 5.57   | 6.65   | 1.19 |
| BSU30700,rpmE2 | 3138978 | 3139226 | 1.15   | 1.85   | 1.61 |
| BSU30710,ythA  | 3139431 | 3140762 | 0.47   | 0.29   | 0.61 |
| BSU30720,ythB  | 3140806 | 3141846 | 0.81   | 0.63   | 0.78 |
| BSU30739,ytzL  | 3141900 | 3142058 | 0.98   | 1.16   | 1.18 |
| BSU30740,mntD  | 3142077 | 3142964 | 5.21   | 1.71   | 0.33 |
| BSU30750,mntC  | 3142954 | 3144261 | 4.80   | 1.43   | 0.30 |
| BSU30760,mntB  | 3144267 | 3145019 | 5.11   | 1.39   | 0.27 |
| BSU30770,mntA  | 3145038 | 3145958 | 5.72   | 1.84   | 0.32 |
| BSU30780,menC  | 3146238 | 3147353 | 3.14   | 5.63   | 1.79 |
| BSU30790,menE  | 3147350 | 3148810 | 2.79   | 4.66   | 1.67 |
| BSU30800,menB  | 3148901 | 3149716 | 22.88  | 21.31  | 0.93 |
| BSU30810,ytxM  | 3149751 | 3150575 | 3.81   | 3.74   | 0.98 |
| BSU30820,menD  | 3150563 | 3152305 | 5.49   | 4.69   | 0.85 |
| BSU30830,menF  | 3152302 | 3153717 | 5.49   | 4.08   | 0.74 |
| BSU30840,yteA  | 3154007 | 3154726 | 0.18   | 0.73   | 4.09 |
| BSU30850,ytdA  | 3154735 | 3155553 | 0.18   | 0.17   | 0.96 |
| BSU30860,ytcA  | 3155725 | 3157011 | 0.09   | 0.08   | 0.93 |
| BSU30870,ytcB  | 3157008 | 3157958 | 0.06   | 0.06   | 0.94 |
| BSU30880,ytcC  | 3157961 | 3159184 | 0.05   | 0.07   | 1.38 |
| BSU30890,ytxO  | 3159258 | 3159689 | 0.12   | 0.14   | 1.13 |
| BSU30900,cotS  | 3159691 | 3160746 | 0.17   | 0.21   | 1.24 |
| BSU30910,cotSA | 3160761 | 3161894 | 0.07   | 0.07   | 0.92 |
| BSU30920,cotI  | 3162084 | 3163157 | 0.10   | 0.13   | 1.26 |

|               |         |         |       |       |      |
|---------------|---------|---------|-------|-------|------|
| BSU30930,ytaB | 3163237 | 3163704 | 0.30  | 0.38  | 1.29 |
| BSU30940,glgP | 3163735 | 3166131 | 0.33  | 0.37  | 1.09 |
| BSU30950,glgA | 3166118 | 3167572 | 0.18  | 0.21  | 1.17 |
| BSU30960,glgD | 3167569 | 3168600 | 0.17  | 0.27  | 1.58 |
| BSU30970,glgC | 3168624 | 3169766 | 0.15  | 0.17  | 1.16 |
| BSU30980,glgB | 3169763 | 3171646 | 0.13  | 0.15  | 1.09 |
| BSU30990,thiT | 3179306 | 3179884 | 3.78  | 0.60  | 0.16 |
| BSU31000,yuaI | 3179926 | 3180447 | 0.76  | 0.55  | 0.72 |
| BSU31010,yuaG | 3180465 | 3181994 | 0.38  | 0.32  | 0.83 |
| BSU31020,yuaF | 3182015 | 3182539 | 0.25  | 0.25  | 0.99 |
| BSU31030,yuaE | 3182707 | 3183195 | 1.92  | 2.95  | 1.53 |
| BSU31040,yuaD | 3183201 | 3183779 | 3.85  | 2.39  | 0.62 |
| BSU31050,gsbB | 3183867 | 3185075 | 0.63  | 0.57  | 0.91 |
| BSU31060,gsbA | 3185092 | 3186564 | 0.23  | 0.19  | 0.84 |
| BSU31070,yuaC | 3186763 | 3187305 | 5.02  | 4.15  | 0.83 |
| BSU31080,yuaB | 3187503 | 3188048 | 21.95 | 4.38  | 0.20 |
| BSU31090,ktrA | 3188414 | 3189082 | 1.35  | 0.53  | 0.39 |
| BSU31100,ktrB | 3189089 | 3190426 | 3.49  | 1.61  | 0.46 |
| BSU31110,yubF | 3190462 | 3190725 | 19.95 | 10.38 | 0.52 |
| BSU31120,lytG | 3190834 | 3191682 | 9.41  | 5.38  | 0.57 |
| BSU31130,yubD | 3191843 | 3193378 | 1.42  | 3.45  | 2.42 |
| BSU31140,cdoA | 3193863 | 3194348 | 0.91  | 0.71  | 0.78 |
| BSU31150,yubB | 3194635 | 3195465 | 13.50 | 7.51  | 0.56 |
| BSU31160,yubA | 3195558 | 3196724 | 6.57  | 5.67  | 0.86 |
| BSU31170,yulF | 3196906 | 3197892 | 5.95  | 6.17  | 1.04 |
| BSU31180,yulE | 3197933 | 3199207 | 1.68  | 1.30  | 0.77 |
| BSU31190,yulD | 3199233 | 3199547 | 1.32  | 0.67  | 0.50 |
| BSU31200,yulC | 3199565 | 3201022 | 0.79  | 0.69  | 0.88 |
| BSU31210,yulB | 3201027 | 3201803 | 1.18  | 1.20  | 1.02 |
| BSU31220,yuxG | 3201860 | 3203929 | 1.27  | 1.05  | 0.83 |
| BSU31230,tlpB | 3204067 | 3206055 | 0.58  | 0.85  | 1.46 |
| BSU31240,mcpA | 3206169 | 3208154 | 0.29  | 1.24  | 4.21 |
| BSU31250,tlpA | 3208280 | 3210268 | 0.07  | 0.21  | 2.84 |
| BSU31260,mcpB | 3210445 | 3212433 | 1.38  | 1.62  | 1.17 |
| BSU31270,tgl  | 3212591 | 3213328 | 0.20  | 0.16  | 0.76 |
| BSU31279,yuzH | 3213342 | 3213596 | 0.55  | 1.33  | 2.42 |
| BSU31280,yugU | 3213854 | 3214252 | 0.38  | 1.04  | 2.70 |
| BSU31290,yugT | 3214372 | 3216036 | 0.30  | 0.28  | 0.91 |
| BSU31300,yugS | 3216163 | 3217452 | 0.28  | 0.40  | 1.41 |
| BSU31310,yugP | 3217496 | 3218173 | 7.93  | 9.06  | 1.14 |
| BSU31319,yuzI | 3218215 | 3218478 | 0.11  | 0.08  | 0.70 |
| BSU31321,mstX | 3218525 | 3218857 | 0.23  | 0.18  | 0.76 |
| BSU31322,yugO | 3218854 | 3219840 | 0.77  | 0.77  | 1.00 |
| BSU31330,yugN | 3219837 | 3220241 | 7.85  | 7.01  | 0.89 |
| BSU31340,yugM | 3220301 | 3220672 | 4.19  | 4.09  | 0.98 |
| BSU31350,pgi  | 3220731 | 3222083 | 26.05 | 21.33 | 0.82 |
| BSU31360,yugK | 3222195 | 3223367 | 3.96  | 4.32  | 1.09 |



|               |         |         |       |       |      |
|---------------|---------|---------|-------|-------|------|
| BSU31370,yugJ | 3223471 | 3224634 | 3.44  | 5.94  | 1.72 |
| BSU31380,yuzA | 3224864 | 3225100 | 1.64  | 4.77  | 2.91 |
| BSU31390,yugI | 3225178 | 3225570 | 78.38 | 36.95 | 0.47 |
| BSU31400,alaT | 3225772 | 3226932 | 19.86 | 10.82 | 0.54 |
| BSU31410,yugG | 3226933 | 3227433 | 10.00 | 5.66  | 0.57 |
| BSU31420,yugF | 3227581 | 3228402 | 0.22  | 0.28  | 1.28 |
| BSU31430,yugE | 3228431 | 3228691 | 4.94  | 7.19  | 1.45 |
| BSU31440,patB | 3228778 | 3229941 | 2.35  | 1.94  | 0.83 |
| BSU31450,kinB | 3230067 | 3231353 | 0.65  | 1.78  | 2.73 |
| BSU31460,kapB | 3231399 | 3231785 | 0.96  | 2.35  | 2.45 |
| BSU31470,kapD | 3231812 | 3232429 | 0.14  | 0.34  | 2.44 |
| BSU31480,yuxJ | 3232640 | 3233818 | 0.48  | 0.94  | 1.94 |
| BSU31490,pbpD | 3233911 | 3235785 | 16.29 | 14.36 | 0.88 |
| BSU31500,yuxK | 3235806 | 3236219 | 47.27 | 42.68 | 0.90 |
| BSU31510,yufK | 3236422 | 3236979 | 19.31 | 11.76 | 0.61 |
| BSU31520,yufL | 3237157 | 3238758 | 5.74  | 4.35  | 0.76 |
| BSU31530,yufM | 3238751 | 3239458 | 9.64  | 7.42  | 0.77 |
| BSU31540,yufN | 3239930 | 3241009 | 0.08  | 0.07  | 0.80 |
| BSU31550,yufO | 3241085 | 3242617 | 0.06  | 0.07  | 1.12 |
| BSU31560,yufP | 3242610 | 3243656 | 0.11  | 0.11  | 1.00 |
| BSU31570,yufQ | 3243657 | 3244616 | 0.16  | 0.12  | 0.76 |
| BSU31580,maeN | 3244770 | 3246116 | 16.57 | 13.22 | 0.80 |
| BSU31590,yufS | 3246152 | 3246367 | 0.28  | 0.34  | 1.18 |
| BSU31600,mrpA | 3246598 | 3249003 | 5.04  | 3.64  | 0.72 |
| BSU31610,mrpB | 3248996 | 3249427 | 7.30  | 4.63  | 0.63 |
| BSU31620,mrpC | 3249427 | 3249768 | 7.55  | 4.55  | 0.60 |
| BSU31630,mrpD | 3249761 | 3251242 | 7.21  | 4.17  | 0.58 |
| BSU31640,mrpE | 3251248 | 3251724 | 9.91  | 5.80  | 0.59 |
| BSU31650,mrpF | 3251724 | 3252008 | 11.34 | 6.98  | 0.62 |
| BSU31660,mrpG | 3251992 | 3252366 | 9.37  | 6.30  | 0.67 |
| BSU31670,yuxO | 3252405 | 3252785 | 6.69  | 4.94  | 0.74 |
| BSU31680,comA | 3252804 | 3253448 | 4.13  | 4.51  | 1.09 |
| BSU31690,comP | 3253529 | 3255838 | 8.04  | 12.04 | 1.50 |
| BSU31700,comX | 3255853 | 3256020 | 4.98  | 17.38 | 3.49 |
| BSU31710,comQ | 3256008 | 3256907 | 1.19  | 4.45  | 3.74 |
| BSU31720,degQ | 3257092 | 3257232 | 0.97  | 0.99  | 1.02 |
| BSU31730,yuzC | 3257693 | 3258061 | 11.47 | 12.63 | 1.10 |
| BSU31740,yuxH | 3258037 | 3259266 | 3.85  | 5.79  | 1.50 |
| BSU31750,yueK | 3259403 | 3260875 | 8.71  | 9.92  | 1.14 |
| BSU31760,pncA | 3260891 | 3261442 | 3.57  | 5.86  | 1.64 |
| BSU31770,yueI | 3261539 | 3261937 | 3.61  | 4.04  | 1.12 |
| BSU31780,yueH | 3262009 | 3262257 | 3.72  | 4.29  | 1.15 |
| BSU31790,yueG | 3262330 | 3262551 | 32.01 | 24.41 | 0.76 |
| BSU31800,yueF | 3262611 | 3263720 | 20.55 | 17.81 | 0.87 |
| BSU31810,yuzE | 3263835 | 3264224 | 2.13  | 3.93  | 1.85 |
| BSU31820,yuzF | 3264265 | 3264501 | 12.65 | 22.95 | 1.81 |
| BSU31830,yueE | 3264678 | 3265208 | 2.32  | 7.47  | 3.22 |

|                |         |         |        |        |       |
|----------------|---------|---------|--------|--------|-------|
| BSU31840,yueD  | 3265406 | 3266137 | 11.26  | 8.98   | 0.80  |
| BSU31850,yueC  | 3266200 | 3266655 | 9.19   | 5.26   | 0.57  |
| BSU31860,yueB  | 3266687 | 3269917 | 10.14  | 4.11   | 0.41  |
| BSU31875,yukB  | 3269914 | 3274401 | 6.70   | 2.72   | 0.41  |
| BSU31890,yukC  | 3274462 | 3275817 | 2.07   | 1.33   | 0.65  |
| BSU31900,yukD  | 3275832 | 3276071 | 2.52   | 2.11   | 0.84  |
| BSU31910,yukE  | 3276141 | 3276434 | 50.60  | 47.04  | 0.93  |
| BSU31920,yukF  | 3276955 | 3278223 | 2.49   | 3.00   | 1.20  |
| BSU31930,ald   | 3278325 | 3279461 | 31.43  | 110.45 | 3.51  |
| BSU31945,yukJ  | 3279573 | 3280250 | 1.25   | 32.18  | 25.84 |
| BSU31959,ybdZ  | 3280294 | 3280503 | 0.86   | 1.35   | 1.57  |
| BSU31960,dhbF  | 3280519 | 3287655 | 0.66   | 0.57   | 0.87  |
| BSU31970,dhbB  | 3287675 | 3288613 | 0.87   | 0.43   | 0.49  |
| BSU31980,dhbE  | 3288641 | 3290260 | 0.81   | 0.37   | 0.46  |
| BSU31990,dhbC  | 3290289 | 3291485 | 0.85   | 0.48   | 0.57  |
| BSU32000,dhbA  | 3291511 | 3292296 | 1.01   | 0.43   | 0.43  |
| BSU32010,besA  | 3292490 | 3293359 | 2.65   | 1.03   | 0.39  |
| BSU32020,yuiH  | 3293573 | 3294169 | 1.00   | 1.11   | 1.11  |
| BSU32030,bioYB | 3294270 | 3294872 | 1.86   | 1.36   | 0.73  |
| BSU32040,yuiF  | 3294942 | 3296270 | 4.36   | 4.64   | 1.06  |
| BSU32050,yuiE  | 3296417 | 3297919 | 5.15   | 6.18   | 1.20  |
| BSU32060,yuiD  | 3298077 | 3298553 | 6.48   | 9.05   | 1.40  |
| BSU32070,yuiC  | 3298584 | 3299240 | 1.31   | 1.52   | 1.15  |
| BSU32080,yuiB  | 3299344 | 3299664 | 2.21   | 3.83   | 1.73  |
| BSU32090,yuiA  | 3299718 | 3299861 | 0.43   | 2.44   | 5.72  |
| BSU32100,yumB  | 3300034 | 3301254 | 1.98   | 4.74   | 2.39  |
| BSU32110,yumC  | 3301586 | 3302584 | 24.35  | 28.59  | 1.17  |
| BSU32120,yuzG  | 3302623 | 3302763 | 5.16   | 4.40   | 0.85  |
| BSU32130,guaC  | 3303042 | 3304022 | 0.33   | 0.55   | 1.68  |
| BSU32140,paiB  | 3304096 | 3304719 | 0.51   | 0.64   | 1.25  |
| BSU32150,paiA  | 3304743 | 3305261 | 0.24   | 0.32   | 1.30  |
| BSU32160,yutM  | 3305599 | 3305961 | 50.51  | 45.10  | 0.89  |
| BSU32170,dapF  | 3306040 | 3306894 | 18.43  | 17.66  | 0.96  |
| BSU32180,yutK  | 3307017 | 3308231 | 15.09  | 7.37   | 0.49  |
| BSU32190,yuzB  | 3308368 | 3308604 | 5.87   | 7.00   | 1.19  |
| BSU32200,yutJ  | 3308867 | 3309934 | 44.65  | 16.88  | 0.38  |
| BSU32210,yuzD  | 3309960 | 3310286 | 3.01   | 4.77   | 1.59  |
| BSU32220,yutI  | 3310386 | 3310721 | 212.16 | 242.05 | 1.14  |
| BSU32230,yuxL  | 3310763 | 3312736 | 0.36   | 1.99   | 5.54  |
| BSU32240,thrB  | 3312844 | 3313773 | 8.06   | 78.43  | 9.73  |
| BSU32250,thrC  | 3313770 | 3314828 | 9.09   | 82.85  | 9.12  |
| BSU32260,hom   | 3314828 | 3316129 | 6.06   | 39.63  | 6.53  |
| BSU32270,yutH  | 3316330 | 3317349 | 0.14   | 0.69   | 4.79  |
| BSU32280,yutG  | 3317502 | 3318002 | 0.23   | 1.17   | 5.07  |
| BSU32290,yutF  | 3318029 | 3318799 | 9.66   | 12.72  | 1.32  |
| BSU32300,yutE  | 3318828 | 3319262 | 7.28   | 13.24  | 1.82  |
| BSU32310,yutD  | 3319286 | 3319561 | 4.56   | 9.54   | 2.09  |

|               |         |         |       |       |      |
|---------------|---------|---------|-------|-------|------|
| BSU32320,yutC | 3319676 | 3320308 | 3.04  | 7.84  | 2.58 |
| BSU32330,lipA | 3320324 | 3321220 | 21.07 | 25.13 | 1.19 |
| BSU32340,lytH | 3321455 | 3322435 | 0.33  | 0.86  | 2.57 |
| BSU32350,yunB | 3322463 | 3323227 | 2.67  | 2.24  | 0.84 |
| BSU32360,yunC | 3323300 | 3323605 | 16.16 | 13.40 | 0.83 |
| BSU32370,yunD | 3323670 | 3325058 | 16.61 | 13.14 | 0.79 |
| BSU32380,yunE | 3325078 | 3325899 | 9.33  | 6.80  | 0.73 |
| BSU32390,yunF | 3325917 | 3326765 | 3.35  | 3.78  | 1.13 |
| BSU32400,yunG | 3326803 | 3327150 | 0.64  | 1.02  | 1.59 |
| BSU32410,pucH | 3327247 | 3328587 | 0.97  | 0.68  | 0.70 |
| BSU32420,pucR | 3328762 | 3330357 | 0.85  | 0.66  | 0.78 |
| BSU32430,pucJ | 3330502 | 3331851 | 0.59  | 0.45  | 0.76 |
| BSU32440,pucK | 3331857 | 3333149 | 0.46  | 0.42  | 0.91 |
| BSU32450,pucL | 3333162 | 3334646 | 0.85  | 0.66  | 0.78 |
| BSU32460,pucM | 3334646 | 3334990 | 3.30  | 1.77  | 0.54 |
| BSU32469,yuzJ | 3335414 | 3335545 | 0.29  | 0.41  | 1.41 |
| BSU32470,pucE | 3335751 | 3336272 | 0.36  | 0.24  | 0.66 |
| BSU32480,pucD | 3336263 | 3338500 | 0.28  | 0.19  | 0.70 |
| BSU32490,pucC | 3338501 | 3339334 | 0.25  | 0.20  | 0.81 |
| BSU32500,pucB | 3339331 | 3339948 | 0.28  | 0.26  | 0.92 |
| BSU32510,pucA | 3339945 | 3340937 | 0.16  | 0.10  | 0.66 |
| BSU32520,pucG | 3341166 | 3342416 | 1.11  | 1.24  | 1.12 |
| BSU32530,yurH | 3342433 | 3343671 | 0.58  | 0.60  | 1.03 |
| BSU32540,bsn  | 3344113 | 3344979 | 1.73  | 1.79  | 1.04 |
| BSU32550,yurJ | 3345013 | 3346116 | 1.95  | 2.89  | 1.48 |
| BSU32560,frlR | 3346238 | 3347026 | 2.71  | 3.04  | 1.12 |
| BSU32570,frlD | 3347051 | 3347905 | 0.56  | 0.66  | 1.18 |
| BSU32580,frlM | 3347919 | 3348821 | 0.06  | 0.07  | 1.23 |
| BSU32590,frlN | 3348825 | 3349703 | 0.06  | 0.07  | 1.19 |
| BSU32600,frlO | 3349761 | 3351029 | 0.09  | 0.11  | 1.15 |
| BSU32610,frlB | 3351110 | 3352096 | 0.21  | 0.40  | 1.91 |
| BSU32620,yurQ | 3352312 | 3352686 | 14.94 | 15.38 | 1.03 |
| BSU32630,yurR | 3352789 | 3353907 | 6.90  | 6.20  | 0.90 |
| BSU32640,sspG | 3354066 | 3354212 | 5.43  | 4.70  | 0.87 |
| BSU32650,yurS | 3354212 | 3354487 | 3.57  | 3.11  | 0.87 |
| BSU32660,yurT | 3354551 | 3354934 | 16.69 | 22.04 | 1.32 |
| BSU32669,yuzN | 3355045 | 3355323 | 9.39  | 7.50  | 0.80 |
| BSU32670,sufB | 3355593 | 3356990 | 86.21 | 75.85 | 0.88 |
| BSU32680,iscU | 3357011 | 3357454 | 66.36 | 49.49 | 0.75 |
| BSU32690,sufS | 3357444 | 3358664 | 60.73 | 42.17 | 0.69 |
| BSU32700,sufD | 3358664 | 3359977 | 60.25 | 46.64 | 0.77 |
| BSU32710,sufC | 3359995 | 3360780 | 41.98 | 33.07 | 0.79 |
| BSU32719,yuzK | 3360974 | 3361111 | 2.19  | 12.76 | 5.84 |
| BSU32720,yurZ | 3361305 | 3361682 | 0.52  | 0.97  | 1.85 |
| BSU32730,metN | 3361767 | 3362591 | 9.73  | 21.47 | 2.21 |
| BSU32740,metP | 3362605 | 3363273 | 7.07  | 8.95  | 1.27 |
| BSU32750,metQ | 3363266 | 3364291 | 6.36  | 7.76  | 1.22 |

|                |         |         |        |       |      |
|----------------|---------|---------|--------|-------|------|
| BSU32760,yusD  | 3364618 | 3364962 | 0.34   | 1.04  | 3.02 |
| BSU32770,yusE  | 3365069 | 3365389 | 0.63   | 1.66  | 2.65 |
| BSU32780,yusF  | 3365391 | 3365831 | 0.80   | 2.27  | 2.85 |
| BSU32790,yusG  | 3365831 | 3366067 | 6.77   | 16.54 | 2.44 |
| BSU32800,yusH  | 3366123 | 3366506 | 14.06  | 24.47 | 1.74 |
| BSU32810,yusI  | 3366573 | 3366929 | 3.29   | 3.82  | 1.16 |
| BSU32820,fadE  | 3367040 | 3368824 | 3.86   | 3.41  | 0.88 |
| BSU32830,yusK  | 3368839 | 3370014 | 3.10   | 2.51  | 0.81 |
| BSU32840,fadN  | 3370025 | 3372472 | 2.37   | 1.82  | 0.77 |
| BSU32849,yuzL  | 3372569 | 3372715 | 0.10   | 0.12  | 1.24 |
| BSU32850,fadM  | 3372740 | 3373648 | 0.06   | 0.07  | 1.14 |
| BSU32859,yuzM  | 3373743 | 3373988 | 0.30   | 0.57  | 1.87 |
| BSU32860,yusN  | 3374001 | 3374333 | 0.41   | 0.69  | 1.69 |
| BSU32870,yusO  | 3374492 | 3374959 | 1.71   | 1.66  | 0.97 |
| BSU32880,yusP  | 3374956 | 3376581 | 4.55   | 3.01  | 0.66 |
| BSU32890,yusQ  | 3376617 | 3377000 | 0.45   | 0.37  | 0.82 |
| BSU32900,yusR  | 3377019 | 3377408 | 0.59   | 0.48  | 0.81 |
| BSU32910,yusS  | 3377430 | 3377759 | 0.48   | 0.29  | 0.62 |
| BSU32920,yusT  | 3377893 | 3378780 | 2.01   | 1.82  | 0.90 |
| BSU32930,yusU  | 3378800 | 3379087 | 13.55  | 24.40 | 1.80 |
| BSU32940,yusV  | 3379112 | 3379939 | 108.41 | 65.16 | 0.60 |
| BSU32950,yusW  | 3380157 | 3380594 | 0.11   | 0.23  | 2.15 |
| BSU32980,yusZ  | 3382633 | 3383475 | 0.36   | 0.87  | 2.41 |
| BSU32990,mrgA  | 3383565 | 3384026 | 15.06  | 31.93 | 2.12 |
| BSU33000,htrB  | 3384070 | 3385446 | 12.42  | 7.84  | 0.63 |
| BSU33010,cssR  | 3385724 | 3386401 | 2.78   | 2.41  | 0.87 |
| BSU33020,cssS  | 3386398 | 3387753 | 4.87   | 3.63  | 0.74 |
| BSU33029,yuzO  | 3387781 | 3387945 | 2.57   | 4.38  | 1.70 |
| BSU33030,yuxN  | 3388113 | 3388988 | 3.14   | 3.70  | 1.18 |
| BSU33040,fumC  | 3389024 | 3390412 | 32.19  | 28.78 | 0.89 |
| BSU33049,yvzF  | 3390479 | 3390664 | 6.45   | 5.27  | 0.82 |
| BSU33050,gerAA | 3390782 | 3392230 | 1.13   | 0.94  | 0.83 |
| BSU33060,gerAB | 3392199 | 3393296 | 1.26   | 1.01  | 0.81 |
| BSU33070,gerAC | 3393293 | 3394414 | 0.83   | 0.98  | 1.19 |
| BSU33080,liaR  | 3394422 | 3395057 | 1.84   | 2.27  | 1.23 |
| BSU33090,liaS  | 3395035 | 3396117 | 3.84   | 4.84  | 1.26 |
| BSU33100,liaF  | 3396114 | 3396839 | 5.69   | 6.23  | 1.10 |
| BSU33110,liaG  | 3396873 | 3397745 | 6.66   | 6.72  | 1.01 |
| BSU33120,liaH  | 3397846 | 3398523 | 0.42   | 1.04  | 2.45 |
| BSU33130,lial  | 3398550 | 3398930 | 0.29   | 0.75  | 2.59 |
| BSU33140,yvqJ  | 3399092 | 3400360 | 0.33   | 0.53  | 1.61 |
| BSU33150,yvqK  | 3400537 | 3401118 | 12.07  | 14.32 | 1.19 |
| BSU33160,yvrA  | 3401141 | 3402469 | 10.75  | 12.36 | 1.15 |
| BSU33170,yvrB  | 3402469 | 3403530 | 13.68  | 13.03 | 0.95 |
| BSU33180,yvrC  | 3403493 | 3404437 | 11.28  | 7.80  | 0.69 |
| BSU33190,yvrD  | 3404835 | 3405626 | 2.36   | 2.86  | 1.21 |
| BSU33200,yvrE  | 3405664 | 3406542 | 23.45  | 23.72 | 1.01 |

|               |         |         |        |        |      |
|---------------|---------|---------|--------|--------|------|
| BSU33210,yvrG | 3406614 | 3408356 | 12.10  | 8.87   | 0.73 |
| BSU33221,yvrH | 3408353 | 3409066 | 4.37   | 4.32   | 0.99 |
| BSU33222,rsoA | 3409219 | 3409458 | 0.09   | 0.24   | 2.65 |
| BSU33230,sigO | 3409462 | 3409992 | 0.09   | 0.15   | 1.68 |
| BSU33239,yvrJ | 3410007 | 3410345 | 0.11   | 0.18   | 1.66 |
| BSU33240,oxdC | 3410466 | 3411623 | 0.23   | 0.66   | 2.89 |
| BSU33250,yvrL | 3411684 | 3412094 | 0.27   | 1.45   | 5.38 |
| BSU33260,yvrN | 3412128 | 3413357 | 9.01   | 10.86  | 1.21 |
| BSU33270,yvrO | 3413350 | 3414039 | 6.99   | 6.64   | 0.95 |
| BSU33280,yvrP | 3414023 | 3415216 | 4.78   | 4.40   | 0.92 |
| BSU33290,fhuC | 3415387 | 3416196 | 9.38   | 5.24   | 0.56 |
| BSU33300,fhuG | 3416212 | 3417222 | 9.64   | 5.20   | 0.54 |
| BSU33310,fhuB | 3417222 | 3418376 | 5.57   | 3.45   | 0.62 |
| BSU33320,fhuD | 3418474 | 3419421 | 10.68  | 8.08   | 0.76 |
| BSU33330,lysP | 3419656 | 3421065 | 7.97   | 3.17   | 0.40 |
| BSU33340,sspJ | 3421465 | 3421605 | 0.54   | 0.89   | 1.67 |
| BSU33350,yvsG | 3421772 | 3422254 | 3.31   | 1.89   | 0.57 |
| BSU33360,yvgJ | 3422354 | 3424207 | 5.14   | 4.63   | 0.90 |
| BSU33370,yvgK | 3424235 | 3425161 | 9.22   | 6.84   | 0.74 |
| BSU33380,yvgL | 3425272 | 3426054 | 8.27   | 6.35   | 0.77 |
| BSU33390,yvgM | 3426035 | 3426718 | 15.93  | 11.67  | 0.73 |
| BSU33400,yvgN | 3426749 | 3427579 | 5.83   | 6.72   | 1.15 |
| BSU33410,yvgO | 3427802 | 3428287 | 0.18   | 0.25   | 1.40 |
| BSU33420,nhaK | 3428331 | 3430343 | 2.96   | 6.89   | 2.33 |
| BSU33430,yvgQ | 3430598 | 3432313 | 3.63   | 10.26  | 2.82 |
| BSU33440,cysJ | 3432339 | 3434156 | 2.76   | 5.04   | 1.83 |
| BSU33450,helD | 3434327 | 3436651 | 9.27   | 3.75   | 0.41 |
| BSU33460,yvgT | 3436849 | 3437457 | 12.45  | 8.05   | 0.65 |
| BSU33470,bdbC | 3437644 | 3438060 | 12.64  | 10.64  | 0.84 |
| BSU33480,bdbD | 3438065 | 3438733 | 8.90   | 8.18   | 0.92 |
| BSU33490,copB | 3438853 | 3440952 | 10.92  | 13.74  | 1.26 |
| BSU33500,copA | 3441121 | 3443529 | 3.97   | 3.19   | 0.80 |
| BSU33510,copZ | 3443613 | 3443822 | 10.30  | 13.72  | 1.33 |
| BSU33520,csoR | 3443896 | 3444201 | 2.42   | 2.62   | 1.08 |
| BSU33530,yvaA | 3444329 | 3445405 | 2.85   | 3.20   | 1.12 |
| BSU33540,yvaB | 3445442 | 3446077 | 4.00   | 7.21   | 1.80 |
| BSU33550,yvaC | 3446237 | 3448132 | 0.23   | 0.18   | 0.77 |
| BSU33560,yvaD | 3448295 | 3448696 | 4.26   | 2.50   | 0.59 |
| BSU33570,yvaE | 3448693 | 3449052 | 5.33   | 3.15   | 0.59 |
| BSU33580,yvaF | 3449049 | 3449621 | 1.89   | 1.40   | 0.74 |
| BSU33590,yvaG | 3449732 | 3450526 | 2.43   | 2.04   | 0.84 |
| BSU33600,smpB | 3451248 | 3451718 | 9.74   | 11.80  | 1.21 |
| BSU33610,rnr  | 3451863 | 3454202 | 14.16  | 22.03  | 1.56 |
| BSU33620,yvaK | 3454221 | 3454967 | 2.73   | 4.96   | 1.82 |
| BSU33630,secG | 3455093 | 3455323 | 114.06 | 116.38 | 1.02 |
| BSU33640,yvaM | 3455472 | 3456242 | 0.21   | 0.29   | 1.37 |
| BSU33650,yvzC | 3456282 | 3456515 | 0.11   | 0.11   | 1.06 |

|                 |         |         |        |        |       |
|-----------------|---------|---------|--------|--------|-------|
| BSU33660,rg hRA | 3456667 | 3457074 | 2.20   | 1.67   | 0.76  |
| BSU33670,rg hRB | 3457104 | 3457523 | 2.05   | 1.56   | 0.76  |
| BSU33680,yvaP   | 3457615 | 3457941 | 5.78   | 5.93   | 1.03  |
| BSU33690,yvaQ   | 3458066 | 3459766 | 2.75   | 4.37   | 1.59  |
| BSU33700,opuBD  | 3459806 | 3460486 | 0.58   | 2.59   | 4.48  |
| BSU33710,opuBC  | 3460503 | 3461423 | 0.40   | 0.99   | 2.51  |
| BSU33720,opuBB  | 3461435 | 3462088 | 0.14   | 0.41   | 3.04  |
| BSU33730,opuBA  | 3462105 | 3463250 | 0.10   | 0.31   | 3.07  |
| BSU33740,yvaV   | 3463534 | 3464067 | 7.66   | 3.46   | 0.45  |
| BSU33750,sdpA   | 3464289 | 3464765 | 0.85   | 2.72   | 3.21  |
| BSU33760,sdpB   | 3464762 | 3465733 | 0.43   | 1.84   | 4.32  |
| BSU33770,spbC   | 3465776 | 3466387 | 1.05   | 7.12   | 6.80  |
| BSU33780,sdpl   | 3466434 | 3467057 | 1.81   | 3.78   | 2.09  |
| BSU33790,sdpR   | 3467054 | 3467326 | 1.02   | 3.37   | 3.31  |
| BSU33800,opuCD  | 3467546 | 3468235 | 0.39   | 2.92   | 7.49  |
| BSU33810,opuCC  | 3468253 | 3469164 | 0.40   | 1.87   | 4.64  |
| BSU33820,opuCB  | 3469184 | 3469837 | 0.44   | 1.97   | 4.53  |
| BSU33830,opuCA  | 3469860 | 3471002 | 0.36   | 1.67   | 4.61  |
| BSU33840,yvbF   | 3471266 | 3471823 | 1.51   | 2.48   | 1.64  |
| BSU33850,yvbG   | 3471841 | 3472476 | 1.25   | 2.34   | 1.87  |
| BSU33860,yvbH   | 3472626 | 3473240 | 1.77   | 3.85   | 2.17  |
| BSU33870,yvbl   | 3473372 | 3474070 | 1.51   | 5.58   | 3.70  |
| BSU33880,yvbJ   | 3474106 | 3475923 | 3.11   | 4.36   | 1.40  |
| BSU33890,yvbK   | 3476043 | 3476510 | 4.18   | 4.41   | 1.05  |
| BSU33900,eno    | 3476555 | 3477847 | 80.73  | 56.75  | 0.70  |
| BSU33910,pgm    | 3477877 | 3479412 | 61.65  | 35.00  | 0.57  |
| BSU33920,tpiA   | 3479405 | 3480166 | 49.26  | 26.36  | 0.53  |
| BSU33930,pgk    | 3480197 | 3481381 | 41.15  | 21.08  | 0.51  |
| BSU33940,gapA   | 3481698 | 3482705 | 136.59 | 49.95  | 0.37  |
| BSU33950,cggR   | 3482752 | 3483774 | 15.76  | 3.88   | 0.25  |
| BSU33960,araE   | 3484072 | 3485466 | 1.06   | 0.53   | 0.50  |
| BSU33970,araR   | 3485604 | 3486758 | 3.44   | 2.42   | 0.70  |
| BSU33980,yvbT   | 3486807 | 3487817 | 4.58   | 4.23   | 0.92  |
| BSU33990,yvbU   | 3487974 | 3488852 | 1.28   | 1.30   | 1.02  |
| BSU34000,cyeB   | 3488952 | 3489869 | 4.63   | 2.38   | 0.51  |
| BSU34010,yvbW   | 3489910 | 3491253 | 1.96   | 16.74  | 8.54  |
| BSU34020,yvbX   | 3491655 | 3492689 | 0.35   | 4.04   | 11.38 |
| BSU34030,yvbY   | 3492797 | 3493519 | 34.25  | 257.23 | 7.51  |
| BSU34040,yvfW   | 3493519 | 3494958 | 23.30  | 143.36 | 6.15  |
| BSU34050,yvfV   | 3494985 | 3495701 | 6.39   | 15.94  | 2.49  |
| BSU34060,yvfU   | 3495876 | 3496478 | 1.54   | 2.43   | 1.58  |
| BSU34070,yvfT   | 3496495 | 3497481 | 1.52   | 2.71   | 1.79  |
| BSU34080,yvfS   | 3497614 | 3498351 | 0.10   | 0.13   | 1.30  |
| BSU34090,yvfR   | 3498352 | 3499257 | 0.12   | 0.16   | 1.41  |
| BSU34100,rsbQ   | 3499541 | 3500350 | 4.72   | 4.16   | 0.88  |
| BSU34110,rsbP   | 3500386 | 3501597 | 6.09   | 4.32   | 0.71  |
| BSU34120,ganB   | 3501651 | 3502940 | 0.41   | 0.23   | 0.57  |

|                |         |         |       |       |      |
|----------------|---------|---------|-------|-------|------|
| BSU34130, ganA | 3503020 | 3505083 | 0.58  | 0.44  | 0.76 |
| BSU34140, ganQ | 3505102 | 3505953 | 0.83  | 0.59  | 0.71 |
| BSU34150, ganP | 3505957 | 3507213 | 1.13  | 0.57  | 0.50 |
| BSU34160, cycB | 3507253 | 3508518 | 1.58  | 0.78  | 0.49 |
| BSU34170, ganR | 3508659 | 3509651 | 1.08  | 0.72  | 0.67 |
| BSU34180, yvfI | 3509831 | 3510490 | 2.63  | 3.05  | 1.16 |
| BSU34190, yvfH | 3510780 | 3512471 | 3.88  | 9.77  | 2.52 |
| BSU34200, sigL | 3512498 | 3513808 | 2.64  | 2.50  | 0.94 |
| BSU34210, yvfG | 3513887 | 3514105 | 2.17  | 1.03  | 0.48 |
| BSU34220, epsO | 3514115 | 3515083 | 4.99  | 1.76  | 0.35 |
| BSU34230, epsN | 3515062 | 3516228 | 4.94  | 1.91  | 0.39 |
| BSU34240, epsM | 3516233 | 3516883 | 7.28  | 2.74  | 0.38 |
| BSU34250, epsL | 3516880 | 3517488 | 8.50  | 3.17  | 0.37 |
| BSU34265, epsK | 3517485 | 3519002 | 7.80  | 3.01  | 0.39 |
| BSU34280, epsJ | 3518999 | 3520033 | 9.81  | 4.17  | 0.42 |
| BSU34290, epsI | 3520030 | 3521106 | 9.23  | 3.95  | 0.43 |
| BSU34300, epsH | 3521111 | 3522145 | 10.31 | 4.59  | 0.45 |
| BSU34310, epsG | 3522170 | 3523273 | 10.74 | 4.90  | 0.46 |
| BSU34320, epsF | 3523270 | 3524424 | 14.29 | 6.52  | 0.46 |
| BSU34330, epsE | 3524417 | 3525253 | 8.57  | 5.15  | 0.60 |
| BSU34340, epsD | 3525250 | 3526395 | 11.34 | 6.60  | 0.58 |
| BSU34350, epsC | 3526407 | 3528203 | 8.96  | 5.90  | 0.66 |
| BSU34360, epsB | 3528462 | 3529145 | 24.62 | 11.02 | 0.45 |
| BSU34370, epsA | 3529151 | 3529855 | 15.90 | 6.95  | 0.44 |
| BSU34380, slrR | 3530101 | 3530559 | 2.38  | 1.08  | 0.46 |
| BSU34390, pnbA | 3530635 | 3532104 | 7.69  | 3.87  | 0.50 |
| BSU34400, padC | 3532325 | 3532810 | 0.17  | 0.33  | 1.98 |
| BSU34410, yveG | 3532833 | 3533120 | 0.08  | 0.16  | 1.99 |
| BSU34420, yveF | 3533196 | 3533288 | 0.12  | 0.25  | 1.99 |
| BSU34430, racX | 3533419 | 3534102 | 0.57  | 0.39  | 0.69 |
| BSU34440, pbpE | 3534118 | 3535473 | 0.33  | 0.21  | 0.65 |
| BSU34450, sacB | 3536012 | 3537433 | 0.19  | 0.20  | 1.05 |
| BSU34460, levB | 3537507 | 3539057 | 0.11  | 0.10  | 0.90 |
| BSU34470, yveA | 3539165 | 3540727 | 0.27  | 0.39  | 1.47 |
| BSU34480, yvdT | 3540822 | 3541406 | 4.50  | 4.19  | 0.93 |
| BSU34490, yvdS | 3541488 | 3541823 | 1.88  | 1.56  | 0.83 |
| BSU34500, yvdR | 3541823 | 3542143 | 2.46  | 1.86  | 0.76 |
| BSU34510, yvdQ | 3542179 | 3542691 | 0.52  | 0.45  | 0.87 |
| BSU34520, yvdP | 3542943 | 3544286 | 0.62  | 0.40  | 0.65 |
| BSU34530, cotR | 3544642 | 3545604 | 0.23  | 0.20  | 0.89 |
| BSU34540, clpP | 3546234 | 3546827 | 30.89 | 36.36 | 1.18 |
| BSU34550, pgcM | 3546873 | 3547553 | 1.01  | 0.74  | 0.73 |
| BSU34560, malL | 3547550 | 3549235 | 0.67  | 0.42  | 0.63 |
| BSU34570, yvdK | 3549228 | 3551501 | 0.47  | 0.29  | 0.63 |
| BSU34580, yvdJ | 3551479 | 3552363 | 0.45  | 0.24  | 0.53 |
| BSU34590, mdxG | 3552369 | 3553205 | 0.60  | 0.36  | 0.60 |
| BSU34600, mdxF | 3553206 | 3554513 | 0.47  | 0.25  | 0.54 |

|                |         |         |        |        |      |
|----------------|---------|---------|--------|--------|------|
| BSU34610,mdxE  | 3554553 | 3555806 | 0.38   | 0.23   | 0.60 |
| BSU34620,mdxD  | 3555902 | 3557671 | 0.20   | 0.15   | 0.76 |
| BSU34630,mdxR  | 3557784 | 3558734 | 0.05   | 0.08   | 1.61 |
| BSU34640,yvdD  | 3558940 | 3559515 | 3.65   | 4.14   | 1.13 |
| BSU34650,yvdC  | 3559632 | 3559952 | 5.86   | 8.90   | 1.52 |
| BSU34660,yvdB  | 3559979 | 3561571 | 1.46   | 1.88   | 1.29 |
| BSU34670,yvdA  | 3561590 | 3562183 | 0.29   | 0.25   | 0.86 |
| BSU34680,yvcT  | 3562566 | 3563543 | 5.62   | 6.56   | 1.17 |
| BSU34690,yvcS  | 3563581 | 3565521 | 14.59  | 9.68   | 0.66 |
| BSU34700,yvcR  | 3565496 | 3566275 | 11.31  | 6.04   | 0.53 |
| BSU34710,yvcQ  | 3566358 | 3567428 | 7.58   | 4.44   | 0.59 |
| BSU34720,yvcP  | 3567422 | 3568135 | 3.94   | 3.25   | 0.82 |
| BSU34729,yvzJ  | 3568282 | 3568491 | 0.97   | 0.80   | 0.82 |
| BSU34730,yvcN  | 3568527 | 3569291 | 24.72  | 34.30  | 1.39 |
| BSU34740,crh   | 3569292 | 3569549 | 25.52  | 39.36  | 1.54 |
| BSU34750,whiA  | 3569573 | 3570523 | 16.10  | 19.94  | 1.24 |
| BSU34760,yvcK  | 3570546 | 3571499 | 16.33  | 19.27  | 1.18 |
| BSU34770,yvcJ  | 3571501 | 3572388 | 14.78  | 17.95  | 1.21 |
| BSU34780,yvcI  | 3572413 | 3572889 | 10.39  | 10.05  | 0.97 |
| BSU34790,trxB  | 3573207 | 3574157 | 14.38  | 41.02  | 2.85 |
| BSU34800,cwlO  | 3574363 | 3575784 | 103.12 | 103.54 | 1.00 |
| BSU34810,yvcD  | 3576165 | 3577619 | 9.83   | 6.58   | 0.67 |
| BSU34820,bmrA  | 3577745 | 3579514 | 12.32  | 6.30   | 0.51 |
| BSU34830,yvzA  | 3579679 | 3580038 | 6.16   | 3.07   | 0.50 |
| BSU34840,yvcB  | 3580053 | 3581963 | 3.45   | 1.75   | 0.51 |
| BSU34850,yvcA  | 3581965 | 3582690 | 1.95   | 1.56   | 0.80 |
| BSU34860,hisl  | 3582936 | 3583565 | 0.30   | 0.45   | 1.47 |
| BSU34870,hisF  | 3583562 | 3584320 | 0.31   | 0.40   | 1.31 |
| BSU34880,hisA  | 3584317 | 3585054 | 0.23   | 0.32   | 1.38 |
| BSU34890,hisH  | 3585051 | 3585689 | 0.18   | 0.20   | 1.12 |
| BSU34900,hisB  | 3585690 | 3586274 | 0.12   | 0.16   | 1.32 |
| BSU34910,hisD  | 3586271 | 3587554 | 0.11   | 0.14   | 1.22 |
| BSU34920,hisG  | 3587551 | 3588192 | 0.10   | 0.13   | 1.36 |
| BSU34930,hisZ  | 3588185 | 3589360 | 0.07   | 0.10   | 1.34 |
| BSU34940,yvpB  | 3589611 | 3590363 | 2.72   | 3.09   | 1.13 |
| BSU34950,peiC  | 3590603 | 3591268 | 3.98   | 2.28   | 0.57 |
| BSU34960,yvoF  | 3591288 | 3591806 | 48.84  | 39.68  | 0.81 |
| BSU34970,hprP  | 3591810 | 3592460 | 48.53  | 34.98  | 0.72 |
| BSU34980,yvoD  | 3592457 | 3593395 | 39.61  | 25.69  | 0.65 |
| BSU34990,igt   | 3593419 | 3594228 | 18.53  | 13.35  | 0.72 |
| BSU35000,hprK  | 3594242 | 3595174 | 11.89  | 11.49  | 0.97 |
| BSU35010,nagA  | 3595356 | 3596546 | 6.21   | 4.97   | 0.80 |
| BSU35020,nagBA | 3596543 | 3597271 | 7.43   | 5.21   | 0.70 |
| BSU35030,yvoA  | 3597289 | 3598020 | 4.09   | 2.92   | 0.71 |
| BSU35040,yvnB  | 3598040 | 3601909 | 1.67   | 2.59   | 1.55 |
| BSU35050,yvnA  | 3602074 | 3602547 | 1.13   | 1.66   | 1.48 |
| BSU35060,cypX  | 3602588 | 3603805 | 3.79   | 2.46   | 0.65 |



|                |         |         |       |       |       |
|----------------|---------|---------|-------|-------|-------|
| BSU35070,yvmC  | 3603821 | 3604567 | 2.84  | 0.84  | 0.30  |
| BSU35080,yvmB  | 3604993 | 3605502 | 0.87  | 0.79  | 0.92  |
| BSU35090,yvmA  | 3605523 | 3606734 | 3.40  | 2.43  | 0.71  |
| BSU35100,yvID  | 3606762 | 3607121 | 20.57 | 16.95 | 0.82  |
| BSU35110,yvIC  | 3607123 | 3607320 | 28.84 | 24.19 | 0.84  |
| BSU35120,yvIB  | 3607325 | 3608422 | 16.95 | 13.42 | 0.79  |
| BSU35130,yvIA  | 3608447 | 3608773 | 11.86 | 8.37  | 0.71  |
| BSU35140,yvkN  | 3608991 | 3609221 | 1.91  | 3.45  | 1.81  |
| BSU35150,yvzB  | 3609420 | 3609902 | 1.17  | 2.40  | 2.05  |
| BSU35160,uvrA  | 3610064 | 3612937 | 12.14 | 11.74 | 0.97  |
| BSU35170,uvrB  | 3612945 | 3614930 | 3.63  | 4.86  | 1.34  |
| BSU35180,csbA  | 3615116 | 3615346 | 6.23  | 4.20  | 0.67  |
| BSU35190,yvkC  | 3615793 | 3618288 | 0.39  | 0.29  | 0.75  |
| BSU35200,yvkB  | 3618364 | 3618933 | 1.21  | 1.19  | 0.99  |
| BSU35210,yvkA  | 3618964 | 3620298 | 2.29  | 1.92  | 0.84  |
| BSU35220,minJ  | 3620346 | 3621539 | 21.54 | 16.27 | 0.76  |
| BSU35240,ctpB  | 3622356 | 3623798 | 0.62  | 1.76  | 2.82  |
| BSU35250,ftsX  | 3623938 | 3624828 | 62.25 | 55.22 | 0.89  |
| BSU35260,ftsE  | 3624821 | 3625507 | 11.96 | 12.41 | 1.04  |
| BSU35270,cccB  | 3625741 | 3626079 | 8.98  | 6.72  | 0.75  |
| BSU35280,yvjA  | 3626128 | 3626973 | 5.42  | 1.70  | 0.31  |
| BSU35290,prfB  | 3627139 | 3628240 | 89.37 | 55.06 | 0.62  |
| BSU35300,secA  | 3628310 | 3630835 | 99.72 | 65.92 | 0.66  |
| BSU35310,yvyD  | 3631003 | 3631572 | 1.17  | 9.85  | 8.42  |
| BSU35319,yvzG  | 3631763 | 3632140 | 1.54  | 3.97  | 2.58  |
| BSU35320,fliT  | 3632150 | 3632491 | 1.87  | 6.50  | 3.48  |
| BSU35330,fliS  | 3632488 | 3632889 | 1.33  | 5.64  | 4.25  |
| BSU35340,fliD  | 3632911 | 3634407 | 0.96  | 5.97  | 6.22  |
| BSU35350,yvyC  | 3634425 | 3634754 | 0.39  | 3.15  | 7.99  |
| BSU35360,hag   | 3634987 | 3635901 | 0.36  | 12.40 | 34.05 |
| BSU35370,csrA  | 3636046 | 3636270 | 3.66  | 3.70  | 1.01  |
| BSU35380,yviF  | 3636264 | 3636695 | 3.29  | 3.43  | 1.04  |
| BSU35390,yviE  | 3636716 | 3637291 | 0.34  | 1.27  | 3.71  |
| BSU35400,flgL  | 3637338 | 3638234 | 3.43  | 6.86  | 2.00  |
| BSU35410,flgK  | 3638245 | 3639768 | 2.67  | 5.63  | 2.11  |
| BSU35420,yvyG  | 3639787 | 3640269 | 2.94  | 5.40  | 1.83  |
| BSU35430,flgM  | 3640285 | 3640551 | 2.06  | 4.05  | 1.97  |
| BSU35440,yvyF  | 3640632 | 3641051 | 2.43  | 3.92  | 1.61  |
| BSU35450,comFC | 3641125 | 3641814 | 2.36  | 3.10  | 1.31  |
| BSU35460,comFB | 3641811 | 3642107 | 2.19  | 4.29  | 1.96  |
| BSU35470,comFA | 3642167 | 3643558 | 0.19  | 1.40  | 7.42  |
| BSU35480,yviA  | 3643664 | 3644509 | 8.17  | 7.57  | 0.93  |
| BSU35490,degU  | 3644607 | 3645296 | 7.54  | 16.41 | 2.18  |
| BSU35500,degS  | 3645379 | 3646536 | 4.21  | 5.73  | 1.36  |
| BSU35510,yvyE  | 3646753 | 3647406 | 8.20  | 7.92  | 0.97  |
| BSU35520,yvhJ  | 3647406 | 3648581 | 26.15 | 14.89 | 0.57  |
| BSU35530>tagO  | 3648654 | 3649730 | 20.62 | 17.79 | 0.86  |

|                |         |         |        |        |        |
|----------------|---------|---------|--------|--------|--------|
| BSU35540,tuaH  | 3649875 | 3651068 | 0.45   | 0.48   | 1.06   |
| BSU35550,tuaG  | 3651097 | 3651855 | 0.68   | 0.59   | 0.87   |
| BSU35560,tuaF  | 3651879 | 3652559 | 0.64   | 0.62   | 0.97   |
| BSU35570,tuaE  | 3652588 | 3654054 | 0.55   | 0.53   | 0.96   |
| BSU35580,tuaD  | 3654139 | 3655524 | 0.68   | 0.65   | 0.95   |
| BSU35590,tuaC  | 3655586 | 3656755 | 0.81   | 0.86   | 1.06   |
| BSU35600,tuaB  | 3656752 | 3658203 | 0.57   | 0.59   | 1.03   |
| BSU35620,lytC  | 3659119 | 3660609 | 0.96   | 5.29   | 5.50   |
| BSU35630,lytB  | 3660648 | 3662765 | 0.39   | 3.54   | 9.14   |
| BSU35640,lytA  | 3662789 | 3663097 | 0.23   | 3.18   | 13.95  |
| BSU35650,lytR  | 3663281 | 3664201 | 15.44  | 8.00   | 0.52   |
| BSU35660,mnaA  | 3664241 | 3665383 | 14.21  | 8.17   | 0.57   |
| BSU35670,gtaB  | 3665629 | 3666507 | 48.11  | 42.46  | 0.88   |
| BSU35680,ggaB  | 3667209 | 3669911 | 0.01   | 3.51   | 640.96 |
| BSU35690,ggaA  | 3670035 | 3671375 | 0.00   | 0.00   | 0.00   |
| BSU35700>tagH  | 3673564 | 3675147 | 7.64   | 5.28   | 0.69   |
| BSU35710>tagG  | 3675167 | 3675994 | 5.97   | 3.77   | 0.63   |
| BSU35720>tagF  | 3676159 | 3678399 | 8.69   | 6.30   | 0.72   |
| BSU35730>tagE  | 3678399 | 3680420 | 5.98   | 5.51   | 0.92   |
| BSU35740>tagD  | 3680581 | 3680970 | 120.09 | 105.88 | 0.88   |
| BSU35750>tagA  | 3681370 | 3682140 | 15.22  | 21.21  | 1.39   |
| BSU35760>tagB  | 3682173 | 3683318 | 2.54   | 2.39   | 0.94   |
| BSU35770>tagC  | 3683438 | 3684766 | 0.53   | 0.61   | 1.14   |
| BSU35780,lytD  | 3684826 | 3687468 | 0.42   | 1.13   | 2.67   |
| BSU35790,yvyl  | 3687597 | 3688547 | 3.17   | 1.77   | 0.56   |
| BSU35800,gerBA | 3688812 | 3690263 | 0.31   | 0.19   | 0.62   |
| BSU35810,gerBB | 3690269 | 3691375 | 0.48   | 0.35   | 0.74   |
| BSU35820,gerBC | 3691372 | 3692496 | 0.67   | 0.59   | 0.89   |
| BSU35830,ywtG  | 3692533 | 3693906 | 0.35   | 0.97   | 2.80   |
| BSU35840,ywtF  | 3694239 | 3695207 | 17.62  | 9.72   | 0.55   |
| BSU35850,ywtE  | 3695363 | 3696223 | 10.38  | 9.36   | 0.90   |
| BSU35860,pgdS  | 3696257 | 3697498 | 0.41   | 3.98   | 9.70   |
| BSU35870,pgsE  | 3697639 | 3697806 | 0.74   | 0.86   | 1.16   |
| BSU35880,pgsA  | 3697821 | 3698963 | 0.38   | 0.32   | 0.84   |
| BSU35890,pgsC  | 3698982 | 3699431 | 0.40   | 0.47   | 1.18   |
| BSU35900,pgsB  | 3699446 | 3700627 | 0.40   | 0.45   | 1.14   |
| BSU35910,rbS   | 3701411 | 3702391 | 42.88  | 14.21  | 0.33   |
| BSU35920,rbK   | 3702393 | 3703274 | 87.03  | 32.36  | 0.37   |
| BSU35930,rbD   | 3703271 | 3703666 | 70.13  | 26.51  | 0.38   |
| BSU35940,rbA   | 3703682 | 3705163 | 81.97  | 32.64  | 0.40   |
| BSU35950,rbC   | 3705165 | 3706133 | 128.15 | 43.19  | 0.34   |
| BSU35960,rbB   | 3706145 | 3707062 | 197.24 | 66.03  | 0.33   |
| BSU35970,ywsB  | 3707144 | 3707680 | 215.39 | 75.72  | 0.35   |
| BSU35980,ywsA  | 3707836 | 3708132 | 2.27   | 1.79   | 0.79   |
| BSU35990,ywrO  | 3708172 | 3708699 | 12.16  | 11.38  | 0.94   |
| BSU36000,alsD  | 3708799 | 3709566 | 3.46   | 2.89   | 0.84   |
| BSU36010,alsS  | 3709628 | 3711340 | 2.05   | 1.32   | 0.65   |

|                  |         |         |       |       |      |
|------------------|---------|---------|-------|-------|------|
| BSU36020,alsR    | 3711498 | 3712406 | 0.55  | 0.98  | 1.79 |
| BSU36030,ywrK    | 3712617 | 3713945 | 0.13  | 0.24  | 1.83 |
| BSU36040,ywrJ    | 3714002 | 3714679 | 0.08  | 0.20  | 2.70 |
| BSU36050,cotB    | 3714739 | 3715881 | 0.05  | 0.13  | 2.57 |
| BSU36060,cotH    | 3716009 | 3717097 | 0.03  | 0.05  | 1.71 |
| BSU36070,cotG    | 3717238 | 3717825 | 0.00  | 0.00  | 0.00 |
| BSU36080,ywrF    | 3717999 | 3718616 | 1.21  | 2.35  | 1.94 |
| BSU36090,ywrE    | 3718794 | 3719129 | 0.86  | 0.60  | 0.70 |
| BSU36100,ywrD    | 3719134 | 3720711 | 0.38  | 0.18  | 0.48 |
| BSU36110,ywrC    | 3720925 | 3721401 | 1.40  | 1.03  | 0.74 |
| BSU36120,ywrB    | 3721415 | 3722008 | 2.34  | 1.35  | 0.58 |
| BSU36130,ywrA    | 3722005 | 3722541 | 3.25  | 1.80  | 0.55 |
| BSU36140,ywqO    | 3722568 | 3722789 | 4.50  | 2.55  | 0.57 |
| BSU36150,ywqN    | 3722786 | 3723331 | 4.02  | 2.16  | 0.54 |
| BSU36160,ywqM    | 3723454 | 3724335 | 3.21  | 2.01  | 0.63 |
| BSU36170,ywqL    | 3724420 | 3725136 | 9.21  | 5.42  | 0.59 |
| BSU36180,ywqK    | 3725146 | 3725610 | 7.59  | 5.08  | 0.67 |
| BSU36190,ywqJ    | 3725600 | 3727408 | 5.95  | 2.83  | 0.47 |
| BSU36200,ywqI    | 3727427 | 3727687 | 8.22  | 3.83  | 0.47 |
| BSU36210,ywqH    | 3727697 | 3728119 | 4.59  | 1.98  | 0.43 |
| BSU36220,ywqG    | 3728511 | 3729296 | 4.02  | 2.99  | 0.74 |
| BSU36230,ywqF    | 3729488 | 3730810 | 5.83  | 3.89  | 0.67 |
| BSU36240,ywqE    | 3731005 | 3731769 | 3.99  | 2.59  | 0.65 |
| BSU36250,ptkA    | 3731822 | 3732535 | 6.70  | 5.65  | 0.84 |
| BSU36260,ywqC    | 3732525 | 3733271 | 4.62  | 4.93  | 1.07 |
| BSU36269,ywzD    | 3733505 | 3733648 | 2.41  | 1.38  | 0.57 |
| BSU36270,ywqB    | 3733852 | 3735462 | 6.96  | 3.17  | 0.46 |
| BSU36280,ywqA    | 3735449 | 3738217 | 25.08 | 18.80 | 0.75 |
| BSU36290,ywpJ    | 3738343 | 3739200 | 8.06  | 7.84  | 0.97 |
| BSU36300,glcR    | 3739206 | 3739982 | 5.32  | 4.60  | 0.86 |
| BSU36310,ssbB    | 3740206 | 3740547 | 2.83  | 3.48  | 1.23 |
| BSU36320,ywpG    | 3740624 | 3741007 | 0.44  | 0.57  | 1.28 |
| BSU36330,ywpF    | 3741182 | 3741592 | 6.89  | 10.90 | 1.58 |
| BSU36340,ywpE    | 3741732 | 3742040 | 1.65  | 1.95  | 1.18 |
| BSU36350,ywpD    | 3742384 | 3743220 | 1.53  | 1.84  | 1.20 |
| BSU36360,mscL    | 3743267 | 3743659 | 11.01 | 14.51 | 1.32 |
| BSU36370,fabZ    | 3743732 | 3744157 | 18.76 | 13.48 | 0.72 |
| BSU36380,rapD    | 3744349 | 3745413 | 1.28  | 2.06  | 1.61 |
| BSU36390,flhP    | 3745436 | 3746245 | 3.72  | 7.85  | 2.11 |
| BSU36400,flhO    | 3746279 | 3747091 | 2.56  | 5.21  | 2.04 |
| BSU36410,mbI     | 3747254 | 3748255 | 45.07 | 26.15 | 0.58 |
| BSU36420,spolIID | 3748421 | 3748702 | 0.10  | 0.15  | 1.43 |
| BSU36430,usd     | 3748717 | 3748827 | 0.13  | 0.17  | 1.33 |
| BSU36440,ywoH    | 3749052 | 3749465 | 1.62  | 1.00  | 0.62 |
| BSU36450,ywoG    | 3749487 | 3750677 | 7.69  | 3.58  | 0.47 |
| BSU36460,ywoF    | 3750768 | 3752174 | 6.09  | 3.33  | 0.55 |
| BSU36470,pucl    | 3752280 | 3753752 | 0.09  | 0.12  | 1.31 |

|                 |         |         |        |        |       |
|-----------------|---------|---------|--------|--------|-------|
| BSU36480,ywoD   | 3753933 | 3755291 | 0.68   | 0.47   | 0.70  |
| BSU36490,ywoC   | 3755291 | 3755860 | 0.65   | 0.45   | 0.70  |
| BSU36500,ywoB   | 3756044 | 3756508 | 0.07   | 0.10   | 1.45  |
| BSU36510,amtB   | 3756790 | 3758004 | 19.76  | 4.92   | 0.25  |
| BSU36520,glnK   | 3758016 | 3758366 | 24.15  | 7.79   | 0.32  |
| BSU36530,bcrC   | 3758547 | 3759128 | 18.76  | 8.73   | 0.47  |
| BSU36540,ywnJ   | 3759169 | 3759591 | 1.04   | 0.81   | 0.79  |
| BSU36550,spolIQ | 3759702 | 3760553 | 2.82   | 3.08   | 1.09  |
| BSU36560,ywnH   | 3760694 | 3761185 | 17.33  | 11.95  | 0.69  |
| BSU36570,ywnG   | 3761182 | 3761700 | 26.83  | 17.28  | 0.64  |
| BSU36580,ywnF   | 3761987 | 3762421 | 4.64   | 8.89   | 1.91  |
| BSU36590,clsA   | 3762664 | 3764112 | 7.88   | 4.16   | 0.53  |
| BSU36600,mta    | 3764133 | 3764906 | 0.28   | 0.49   | 1.72  |
| BSU36610,ywnC   | 3765051 | 3765434 | 25.52  | 8.60   | 0.34  |
| BSU36620,ywnB   | 3765469 | 3766110 | 1.69   | 1.48   | 0.87  |
| BSU36630,ywnA   | 3766178 | 3766579 | 6.18   | 5.41   | 0.88  |
| BSU36640,ureC   | 3766714 | 3768423 | 0.63   | 0.51   | 0.80  |
| BSU36650,ureB   | 3768420 | 3768794 | 0.17   | 0.80   | 4.72  |
| BSU36660,ureA   | 3768791 | 3769108 | 0.00   | 0.00   | 0.00  |
| BSU36670,csbD   | 3770104 | 3770292 | 0.22   | 4.02   | 17.96 |
| BSU36680,ywmF   | 3770365 | 3770865 | 0.11   | 0.16   | 1.46  |
| BSU36690,rapB   | 3771000 | 3772133 | 5.35   | 6.36   | 1.19  |
| BSU36700,moaA   | 3772325 | 3773350 | 8.00   | 10.73  | 1.34  |
| BSU36710,fdhD   | 3773366 | 3774154 | 4.09   | 3.90   | 0.95  |
| BSU36720,ywmE   | 3774400 | 3774561 | 0.92   | 3.17   | 3.44  |
| BSU36730,ywmD   | 3774655 | 3775329 | 0.38   | 0.39   | 1.03  |
| BSU36740,ywmC   | 3775653 | 3776336 | 0.21   | 0.48   | 2.32  |
| BSU36750,spolID | 3776722 | 3777753 | 2.47   | 8.73   | 3.53  |
| BSU36760,murAA  | 3777949 | 3779259 | 233.24 | 59.60  | 0.26  |
| BSU36770,ywmB   | 3779293 | 3780033 | 19.45  | 6.66   | 0.34  |
| BSU36780,ywzB   | 3780162 | 3780392 | 1.89   | 2.23   | 1.18  |
| BSU36790,ywmA   | 3780562 | 3781035 | 1.43   | 1.01   | 0.71  |
| BSU36800,atpC   | 3781069 | 3781467 | 228.51 | 110.65 | 0.48  |
| BSU36810,atpD   | 3781491 | 3782912 | 195.58 | 90.45  | 0.46  |
| BSU36820,atpG   | 3782938 | 3783801 | 105.69 | 48.93  | 0.46  |
| BSU36830,atpA   | 3783878 | 3785386 | 132.29 | 65.91  | 0.50  |
| BSU36840,atpH   | 3785403 | 3785948 | 81.06  | 48.15  | 0.59  |
| BSU36850,atpF   | 3785945 | 3786457 | 75.46  | 49.44  | 0.66  |
| BSU36860,atpE   | 3786620 | 3786832 | 186.26 | 93.88  | 0.50  |
| BSU36870,atpB   | 3786878 | 3787612 | 53.26  | 34.35  | 0.64  |
| BSU36880,atpI   | 3787620 | 3788003 | 27.26  | 15.62  | 0.57  |
| BSU36890,upp    | 3788426 | 3789055 | 30.26  | 27.50  | 0.91  |
| BSU36900,glyA   | 3789190 | 3790437 | 23.67  | 51.78  | 2.19  |
| BSU36910,ywlG   | 3790644 | 3791186 | 40.49  | 50.53  | 1.25  |
| BSU36920,ywlF   | 3791199 | 3791648 | 37.18  | 42.74  | 1.15  |
| BSU36930,ywlE   | 3791805 | 3792257 | 5.86   | 5.33   | 0.91  |
| BSU36940,ywlD   | 3792333 | 3792890 | 1.95   | 2.10   | 1.08  |

|                 |         |         |        |        |      |
|-----------------|---------|---------|--------|--------|------|
| BSU36950,ywIC   | 3792969 | 3794009 | 10.43  | 7.39   | 0.71 |
| BSU36960,ywIB   | 3794166 | 3794609 | 1.07   | 0.89   | 0.83 |
| BSU36970,spolIR | 3794676 | 3795350 | 0.60   | 0.52   | 0.88 |
| BSU36980,ywIA   | 3795491 | 3795853 | 8.27   | 6.04   | 0.73 |
| BSU36990,ywkF   | 3795870 | 3796157 | 8.71   | 7.77   | 0.89 |
| BSU37000,prmC   | 3796217 | 3797083 | 9.65   | 7.10   | 0.74 |
| BSU37010,prfA   | 3797085 | 3798155 | 36.91  | 20.14  | 0.55 |
| BSU37020,ywkD   | 3798281 | 3798667 | 1.21   | 1.51   | 1.25 |
| BSU37030,racA   | 3798789 | 3799343 | 1.91   | 2.29   | 1.19 |
| BSU37040,ywkB   | 3799377 | 3800336 | 2.25   | 2.29   | 1.02 |
| BSU37050,ywkA   | 3800418 | 3802166 | 1.02   | 1.17   | 1.15 |
| BSU37060,tdk    | 3802405 | 3802992 | 1.78   | 1.78   | 1.00 |
| BSU37070,rpmE   | 3803081 | 3803281 | 246.48 | 133.65 | 0.54 |
| BSU37080,rho    | 3803400 | 3804683 | 19.51  | 11.74  | 0.60 |
| BSU37090,glpX   | 3805090 | 3806055 | 58.03  | 56.79  | 0.98 |
| BSU37100,murAB  | 3806086 | 3807375 | 33.97  | 29.37  | 0.86 |
| BSU37110,ywjH   | 3807754 | 3808392 | 71.54  | 98.67  | 1.38 |
| BSU37120,fbaA   | 3808512 | 3809369 | 127.75 | 104.73 | 0.82 |
| BSU37130,spoOF  | 3809550 | 3809924 | 2.54   | 3.71   | 1.46 |
| BSU37140,ywjG   | 3810090 | 3810611 | 2.35   | 2.34   | 1.00 |
| BSU37150,pyrG   | 3810693 | 3812300 | 55.65  | 14.23  | 0.26 |
| BSU37160,rpoE   | 3812542 | 3813063 | 62.67  | 43.76  | 0.70 |
| BSU37170,acdA   | 3813246 | 3814385 | 2.60   | 2.15   | 0.82 |
| BSU37180,fadF   | 3814382 | 3816499 | 1.95   | 1.49   | 0.76 |
| BSU37190,clsB   | 3816654 | 3817850 | 0.08   | 0.10   | 1.22 |
| BSU37200,uvrE   | 3817863 | 3818825 | 0.10   | 0.19   | 2.03 |
| BSU37210,ywjC   | 3818906 | 3819178 | 0.19   | 1.33   | 7.03 |
| BSU37220,ywjB   | 3819220 | 3819744 | 31.21  | 31.49  | 1.01 |
| BSU37230,ywjA   | 3819754 | 3821481 | 19.76  | 17.78  | 0.90 |
| BSU37240,ywiE   | 3821570 | 3823072 | 0.54   | 1.63   | 3.04 |
| BSU37250,narI   | 3823558 | 3824229 | 0.23   | 0.39   | 1.69 |
| BSU37260,narJ   | 3824226 | 3824780 | 0.18   | 0.19   | 1.05 |
| BSU37270,narH   | 3824806 | 3826269 | 0.14   | 0.13   | 0.96 |
| BSU37280,narG   | 3826259 | 3829945 | 0.08   | 0.08   | 1.00 |
| BSU37290,arfM   | 3830141 | 3830617 | 0.05   | 0.06   | 1.33 |
| BSU37300,ywiC   | 3830761 | 3831480 | 0.93   | 0.89   | 0.96 |
| BSU37310,fnr    | 3831512 | 3832228 | 0.80   | 1.91   | 2.39 |
| BSU37320,narK   | 3832327 | 3833514 | 0.30   | 1.34   | 4.47 |
| BSU37330,argS   | 3833650 | 3835320 | 60.87  | 68.10  | 1.12 |
| BSU37340,ywiB   | 3835317 | 3835745 | 12.05  | 16.05  | 1.33 |
| BSU37350,sboA   | 3836058 | 3836189 | 0.31   | 0.49   | 1.60 |
| BSU37360,sboX   | 3836146 | 3836298 | 0.00   | 0.00   | 0.00 |
| BSU37370,albA   | 3836323 | 3837669 | 1.24   | 1.14   | 0.92 |
| BSU37380,albB   | 3837682 | 3837843 | 2.48   | 2.53   | 1.02 |
| BSU37390,albC   | 3837840 | 3838559 | 1.32   | 1.52   | 1.15 |
| BSU37400,albD   | 3838552 | 3839862 | 1.11   | 1.09   | 0.98 |
| BSU37410,albE   | 3839852 | 3841012 | 0.37   | 0.49   | 1.33 |

|               |         |         |       |       |      |
|---------------|---------|---------|-------|-------|------|
| BSU37420,albF | 3841017 | 3842297 | 0.21  | 0.31  | 1.45 |
| BSU37430,albG | 3842294 | 3842995 | 0.24  | 0.40  | 1.65 |
| BSU37440,ywhL | 3843001 | 3844377 | 0.15  | 0.17  | 1.10 |
| BSU37450,ywhK | 3844416 | 3845771 | 0.11  | 0.13  | 1.15 |
| BSU37460,rapF | 3846001 | 3847146 | 1.60  | 3.88  | 2.43 |
| BSU37470,phrF | 3847130 | 3847249 | 6.83  | 13.27 | 1.94 |
| BSU37480,ywhH | 3847348 | 3847821 | 0.67  | 0.88  | 1.32 |
| BSU37490,speB | 3847853 | 3848725 | 22.35 | 12.68 | 0.57 |
| BSU37500,speE | 3848786 | 3849616 | 21.47 | 13.16 | 0.61 |
| BSU37510,pbpG | 3849818 | 3851893 | 0.44  | 0.41  | 0.95 |
| BSU37520,ywhD | 3852186 | 3852704 | 22.08 | 21.70 | 0.98 |
| BSU37530,ywhC | 3852718 | 3853377 | 17.75 | 14.53 | 0.82 |
| BSU37540,ywhB | 3853486 | 3853674 | 12.25 | 12.92 | 1.06 |
| BSU37550,ywhA | 3853717 | 3854136 | 9.90  | 7.01  | 0.71 |
| BSU37560,thrZ | 3854256 | 3856172 | 0.16  | 0.26  | 1.61 |
| BSU37570,mmr  | 3857017 | 3858417 | 8.58  | 4.84  | 0.56 |
| BSU37580,ywgB | 3858417 | 3858887 | 2.77  | 1.46  | 0.53 |
| BSU37590,ywgA | 3858999 | 3859499 | 8.69  | 17.55 | 2.02 |
| BSU37600,ywfO | 3859535 | 3860836 | 8.58  | 9.59  | 1.12 |
| BSU37610,ywzC | 3860998 | 3861222 | 11.80 | 5.42  | 0.46 |
| BSU37620,rsfA | 3861437 | 3862213 | 1.15  | 1.03  | 0.90 |
| BSU37630,ywfM | 3862357 | 3863247 | 0.66  | 0.99  | 1.50 |
| BSU37640,ywfL | 3863415 | 3864260 | 9.27  | 8.08  | 0.87 |
| BSU37650,cysL | 3864309 | 3865208 | 2.30  | 2.50  | 1.09 |
| BSU37660,eutD | 3865355 | 3866326 | 25.44 | 37.76 | 1.48 |
| BSU37670,ywfI | 3866611 | 3867360 | 11.72 | 13.36 | 1.14 |
| BSU37680,ywfH | 3867493 | 3868272 | 0.35  | 1.19  | 3.38 |
| BSU37690,ywfG | 3868287 | 3869486 | 1.13  | 2.52  | 2.23 |
| BSU37700,bacE | 3869487 | 3870671 | 0.89  | 1.47  | 1.64 |
| BSU37710,bacD | 3870668 | 3872086 | 0.73  | 1.45  | 1.98 |
| BSU37720,bacC | 3872105 | 3872872 | 0.29  | 1.07  | 3.64 |
| BSU37730,bacB | 3872869 | 3873576 | 0.28  | 1.03  | 3.76 |
| BSU37740,bacA | 3873566 | 3874180 | 0.10  | 0.47  | 4.86 |
| BSU37750,ywfA | 3874332 | 3875570 | 0.15  | 0.11  | 0.72 |
| BSU37760,rocC | 3875780 | 3877192 | 0.41  | 0.25  | 0.61 |
| BSU37770,rocB | 3877192 | 3878892 | 0.19  | 0.10  | 0.51 |
| BSU37780,rocA | 3878966 | 3880513 | 14.21 | 1.72  | 0.12 |
| BSU37790,rocG | 3880740 | 3882014 | 4.65  | 0.65  | 0.14 |
| BSU37800,yweA | 3882191 | 3882655 | 37.32 | 38.12 | 1.02 |
| BSU37810,spsL | 3882979 | 3883434 | 0.26  | 0.24  | 0.93 |
| BSU37820,spsK | 3883427 | 3884278 | 0.52  | 0.46  | 0.90 |
| BSU37830,spsJ | 3884292 | 3885239 | 0.55  | 0.51  | 0.94 |
| BSU37840,spsI | 3885239 | 3885979 | 0.39  | 0.36  | 0.91 |
| BSU37850,spsG | 3886004 | 3887023 | 0.11  | 0.12  | 1.03 |
| BSU37860,spsF | 3887026 | 3887748 | 0.14  | 0.14  | 1.04 |
| BSU37870,spsE | 3887741 | 3888862 | 0.16  | 0.16  | 1.01 |
| BSU37880,spsD | 3888862 | 3889731 | 0.17  | 0.18  | 1.04 |

|               |         |         |        |        |      |
|---------------|---------|---------|--------|--------|------|
| BSU37890,spsC | 3889732 | 3890901 | 0.18   | 0.20   | 1.12 |
| BSU37900,spsB | 3890922 | 3892346 | 0.14   | 0.22   | 1.59 |
| BSU37910,spsA | 3892351 | 3893121 | 0.11   | 0.13   | 1.18 |
| BSU37920,ywdL | 3893441 | 3893986 | 0.20   | 0.27   | 1.36 |
| BSU37930,ywdK | 3894030 | 3894401 | 15.96  | 11.55  | 0.72 |
| BSU37940,ywdJ | 3894463 | 3895785 | 7.93   | 5.55   | 0.70 |
| BSU37950,ywdI | 3895805 | 3896161 | 4.54   | 3.45   | 0.76 |
| BSU37960,ywdH | 3896290 | 3897660 | 1.72   | 2.23   | 1.30 |
| BSU37970,ung  | 3897685 | 3898362 | 7.40   | 5.33   | 0.72 |
| BSU37980,ywdF | 3898376 | 3899182 | 5.91   | 4.62   | 0.78 |
| BSU37990,ywdE | 3899272 | 3899805 | 2.68   | 2.78   | 1.04 |
| BSU38000,ywdD | 3899853 | 3900488 | 1.86   | 2.17   | 1.17 |
| BSU38018,ywzG | 3900481 | 3900819 | 2.18   | 2.35   | 1.08 |
| BSU38020,thiD | 3900963 | 3901778 | 21.65  | 22.46  | 1.04 |
| BSU38030,ywdA | 3901868 | 3902116 | 13.52  | 44.35  | 3.28 |
| BSU38040,sacA | 3902210 | 3903649 | 11.74  | 37.00  | 3.15 |
| BSU38050,sacP | 3903646 | 3905031 | 8.08   | 22.85  | 2.83 |
| BSU38060,ywcJ | 3905333 | 3906103 | 0.43   | 1.99   | 4.58 |
| BSU38070,sacT | 3906142 | 3906972 | 1.48   | 3.59   | 2.43 |
| BSU38080,ywcl | 3907012 | 3907314 | 0.11   | 0.28   | 2.60 |
| BSU38090,vpr  | 3907844 | 3910264 | 0.70   | 0.65   | 0.93 |
| BSU38100,ywcH | 3910302 | 3911303 | 0.85   | 1.00   | 1.17 |
| BSU38110,nfrA | 3911477 | 3912226 | 3.23   | 3.68   | 1.14 |
| BSU38120,rodA | 3912332 | 3913513 | 14.04  | 7.33   | 0.52 |
| BSU38130,ywcE | 3914009 | 3914272 | 2.09   | 2.81   | 1.34 |
| BSU38140,qoxD | 3914315 | 3914689 | 179.28 | 138.63 | 0.77 |
| BSU38150,qoxC | 3914691 | 3915305 | 78.44  | 64.22  | 0.82 |
| BSU38160,qoxB | 3915319 | 3917268 | 43.92  | 43.68  | 0.99 |
| BSU38170,qoxA | 3917296 | 3918261 | 39.29  | 43.34  | 1.10 |
| BSU38180,ywzA | 3918777 | 3919022 | 0.90   | 3.96   | 4.38 |
| BSU38190,gatT | 3919093 | 3920634 | 17.97  | 15.13  | 0.84 |
| BSU38200,gatK | 3920638 | 3921810 | 8.07   | 4.49   | 0.56 |
| BSU38210,ywcD | 3921891 | 3922274 | 1.61   | 1.29   | 0.80 |
| BSU38220,ywcC | 3922292 | 3922963 | 0.97   | 1.50   | 1.55 |
| BSU38229,slrA | 3923319 | 3923477 | 8.23   | 5.13   | 0.62 |
| BSU38230,ywcB | 3923920 | 3924228 | 2.48   | 0.94   | 0.38 |
| BSU38240,ywcA | 3924225 | 3925766 | 3.30   | 1.18   | 0.36 |
| BSU38250,ywbO | 3925797 | 3926399 | 3.52   | 4.74   | 1.35 |
| BSU38260,efeN | 3926682 | 3927932 | 32.02  | 27.41  | 0.86 |
| BSU38270,efeM | 3927951 | 3929108 | 29.21  | 22.14  | 0.76 |
| BSU38280,efeU | 3929105 | 3930550 | 14.81  | 12.83  | 0.87 |
| BSU38290,thiE | 3930707 | 3931375 | 5.72   | 6.36   | 1.11 |
| BSU38300,thiM | 3931372 | 3932190 | 6.26   | 5.70   | 0.91 |
| BSU38310,ywbl | 3932198 | 3933103 | 2.82   | 1.89   | 0.67 |
| BSU38320,ywbH | 3933209 | 3933595 | 2.46   | 2.67   | 1.08 |
| BSU38330,lrgB | 3933577 | 3934254 | 8.50   | 7.51   | 0.88 |
| BSU38340,ywbF | 3934358 | 3935557 | 1.67   | 2.14   | 1.28 |

|               |         |         |       |       |       |
|---------------|---------|---------|-------|-------|-------|
| BSU38350,ywbE | 3935591 | 3935788 | 2.77  | 7.96  | 2.88  |
| BSU38360,ywbD | 3935824 | 3937014 | 9.88  | 7.05  | 0.71  |
| BSU38370,ywbC | 3937135 | 3937515 | 18.14 | 25.40 | 1.40  |
| BSU38380,ywbB | 3937553 | 3938230 | 0.40  | 0.48  | 1.20  |
| BSU38390,ywbA | 3938307 | 3939641 | 0.38  | 0.31  | 0.82  |
| BSU38400,epr  | 3939869 | 3941806 | 0.37  | 1.63  | 4.39  |
| BSU38410,sacX | 3942234 | 3943613 | 0.77  | 0.66  | 0.85  |
| BSU38420,sacY | 3943667 | 3944509 | 1.22  | 1.10  | 0.90  |
| BSU38430,gspA | 3944560 | 3945420 | 0.40  | 6.20  | 15.38 |
| BSU38440,ywaF | 3945530 | 3946243 | 0.45  | 0.31  | 0.69  |
| BSU38450,ywaE | 3946394 | 3946909 | 5.00  | 4.60  | 0.92  |
| BSU38460,tyrZ | 3947158 | 3948399 | 0.53  | 0.45  | 0.84  |
| BSU38470,ywaD | 3948555 | 3949922 | 0.30  | 0.55  | 1.83  |
| BSU38480,ywaC | 3949952 | 3950584 | 3.74  | 6.85  | 1.83  |
| BSU38490,menA | 3950726 | 3951661 | 35.95 | 19.36 | 0.54  |
| BSU38499,ywzH | 3952108 | 3952257 | 10.37 | 5.63  | 0.54  |
| BSU38500,dltA | 3952275 | 3953786 | 28.09 | 13.16 | 0.47  |
| BSU38510,dltB | 3953783 | 3954970 | 29.54 | 13.48 | 0.46  |
| BSU38520,dltC | 3954987 | 3955223 | 45.75 | 22.01 | 0.48  |
| BSU38530,dltD | 3955223 | 3956401 | 37.02 | 16.19 | 0.44  |
| BSU38540,dltE | 3956492 | 3957250 | 50.19 | 23.10 | 0.46  |
| BSU38550,ywaA | 3957391 | 3958482 | 4.86  | 18.97 | 3.91  |
| BSU38560,licH | 3958516 | 3959844 | 6.39  | 10.88 | 1.70  |
| BSU38570,licA | 3959841 | 3960173 | 7.07  | 11.07 | 1.57  |
| BSU38580,licC | 3960192 | 3961550 | 4.61  | 7.48  | 1.62  |
| BSU38590,licB | 3961566 | 3961874 | 3.70  | 5.63  | 1.52  |
| BSU38600,licR | 3962003 | 3963928 | 1.74  | 2.61  | 1.50  |
| BSU38610,yxzF | 3964091 | 3964249 | 1.05  | 1.41  | 1.34  |
| BSU38620,yxIJ | 3964278 | 3964868 | 0.69  | 1.01  | 1.46  |
| BSU38630,katX | 3964997 | 3966640 | 0.20  | 0.39  | 1.98  |
| BSU38640,yxIH | 3966745 | 3967947 | 1.30  | 0.79  | 0.61  |
| BSU38650,yxIG | 3967944 | 3968720 | 1.38  | 0.96  | 0.70  |
| BSU38660,yxIF | 3968717 | 3969604 | 1.00  | 0.82  | 0.82  |
| BSU38670,yxIE | 3969611 | 3969799 | 1.06  | 0.94  | 0.89  |
| BSU38680,yxID | 3969796 | 3970002 | 1.12  | 0.95  | 0.85  |
| BSU38690,yxIC | 3969999 | 3970319 | 0.93  | 0.86  | 0.92  |
| BSU38700,sigY | 3970312 | 3970848 | 0.93  | 3.78  | 4.06  |
| BSU38710,yxIA | 3971060 | 3972433 | 2.93  | 2.25  | 0.77  |
| BSU38720,yxkO | 3972448 | 3973278 | 0.61  | 1.34  | 2.19  |
| BSU38730,cydD | 3973364 | 3975091 | 0.97  | 1.79  | 1.85  |
| BSU38740,cydC | 3975088 | 3976791 | 0.67  | 1.47  | 2.20  |
| BSU38750,cydB | 3976791 | 3977807 | 0.41  | 1.07  | 2.63  |
| BSU38760,cydA | 3977791 | 3979197 | 0.32  | 0.76  | 2.34  |
| BSU38770,cimH | 3979753 | 3981105 | 0.09  | 0.17  | 1.90  |
| BSU38780,yxkI | 3981227 | 3982915 | 2.51  | 1.69  | 0.68  |
| BSU38790,yxzE | 3982973 | 3983173 | 4.74  | 4.21  | 0.89  |
| BSU38800,yxkH | 3983187 | 3984026 | 0.81  | 0.71  | 0.87  |



|               |         |         |        |       |       |
|---------------|---------|---------|--------|-------|-------|
| BSU38810,msmX | 3984133 | 3985230 | 6.06   | 3.88  | 0.64  |
| BSU38820,yxkF | 3985351 | 3986244 | 1.90   | 1.47  | 0.77  |
| BSU38830,aldY | 3986428 | 3987885 | 0.34   | 0.56  | 1.67  |
| BSU38840,yxkD | 3987927 | 3988763 | 10.45  | 5.58  | 0.53  |
| BSU38850,yxkC | 3989232 | 3989873 | 0.63   | 6.94  | 10.93 |
| BSU38860,galE | 3989948 | 3990967 | 30.13  | 28.94 | 0.96  |
| BSU38870,yxkA | 3991082 | 3991588 | 0.25   | 0.30  | 1.19  |
| BSU38880,yxjO | 3991718 | 3992593 | 1.37   | 1.73  | 1.26  |
| BSU38890,yxjN | 3992671 | 3993144 | 2.00   | 2.34  | 1.17  |
| BSU38900,yxjM | 3993162 | 3994382 | 1.07   | 1.39  | 1.30  |
| BSU38910,yxjL | 3994369 | 3995025 | 0.52   | 1.27  | 2.41  |
| BSU38920,pepT | 3995075 | 3996307 | 6.68   | 9.38  | 1.40  |
| BSU38930,yxjJ | 3996829 | 3997092 | 0.04   | 0.62  | 13.88 |
| BSU38940,yxjI | 3997221 | 3997709 | 1.20   | 0.57  | 0.48  |
| BSU38950,yxjH | 3997964 | 3999097 | 0.53   | 3.20  | 6.05  |
| BSU38960,yxjG | 3999350 | 4000486 | 0.30   | 4.38  | 14.52 |
| BSU38970,yxjF | 4000539 | 4001312 | 0.71   | 0.66  | 0.93  |
| BSU38980,scoB | 4001329 | 4001979 | 0.42   | 0.33  | 0.79  |
| BSU38990,scoA | 4001976 | 4002692 | 0.26   | 0.19  | 0.71  |
| BSU39000,yxjC | 4002716 | 4004134 | 0.16   | 0.09  | 0.58  |
| BSU39010,yxjB | 4004288 | 4005136 | 4.70   | 2.77  | 0.59  |
| BSU39020,yxjA | 4005752 | 4006945 | 158.33 | 49.23 | 0.31  |
| BSU39040,yxiS | 4007803 | 4008093 | 9.12   | 11.91 | 1.31  |
| BSU39050,katE | 4008143 | 4010203 | 0.25   | 1.05  | 4.18  |
| BSU39060,citH | 4010404 | 4011684 | 0.14   | 0.18  | 1.24  |
| BSU39070,bglS | 4011842 | 4012570 | 2.06   | 2.51  | 1.22  |
| BSU39080,licT | 4012866 | 4013699 | 4.93   | 5.22  | 1.06  |
| BSU39090,yxiP | 4013795 | 4014475 | 2.84   | 2.52  | 0.89  |
| BSU39100,yxiO | 4014682 | 4015968 | 1.48   | 2.44  | 1.66  |
| BSU39110,deaD | 4015987 | 4017426 | 5.82   | 4.61  | 0.79  |
| BSU39120,yxiM | 4017508 | 4018656 | 0.85   | 0.79  | 0.93  |
| BSU39139,yxzJ | 4019005 | 4019136 | 1.49   | 1.32  | 0.89  |
| BSU39140,yxiK | 4019148 | 4019609 | 1.08   | 0.94  | 0.87  |
| BSU39150,yxiJ | 4019625 | 4019921 | 0.90   | 0.77  | 0.86  |
| BSU39160,yxiI | 4019949 | 4020437 | 0.87   | 0.65  | 0.74  |
| BSU39170,yxzG | 4020455 | 4020907 | 0.94   | 0.73  | 0.77  |
| BSU39180,yxiH | 4020977 | 4021306 | 0.89   | 0.75  | 0.84  |
| BSU39190,yxiG | 4021429 | 4021845 | 0.61   | 0.51  | 0.84  |
| BSU39200,yxzC | 4021896 | 4022264 | 0.57   | 0.44  | 0.78  |
| BSU39210,yxiF | 4022258 | 4022728 | 0.55   | 0.46  | 0.84  |
| BSU39220,yxxG | 4023054 | 4023482 | 4.38   | 5.24  | 1.20  |
| BSU39230,wapA | 4023544 | 4030548 | 3.33   | 3.01  | 0.90  |
| BSU39240,yxxF | 4030710 | 4031645 | 0.80   | 0.82  | 1.03  |
| BSU39250,yxiE | 4031797 | 4032243 | 19.72  | 55.90 | 2.83  |
| BSU39260,bglH | 4032346 | 4033755 | 14.09  | 47.36 | 3.36  |
| BSU39270,bglP | 4033778 | 4035607 | 12.24  | 54.28 | 4.44  |
| BSU39280,yxxE | 4035990 | 4036298 | 10.60  | 7.93  | 0.75  |

|               |         |         |       |       |      |
|---------------|---------|---------|-------|-------|------|
| BSU39290,yxxD | 4036344 | 4036787 | 9.30  | 7.70  | 0.83 |
| BSU39300,yxiD | 4036784 | 4038493 | 3.15  | 2.44  | 0.78 |
| BSU39310,yxiC | 4038513 | 4038782 | 3.99  | 2.82  | 0.71 |
| BSU39320,yxiB | 4038794 | 4039159 | 2.77  | 1.57  | 0.57 |
| BSU39330,abnB | 4039466 | 4040875 | 0.07  | 0.17  | 2.34 |
| BSU39339,yxzL | 4041009 | 4041173 | 0.04  | 0.09  | 2.12 |
| BSU39340,hutP | 4041483 | 4041938 | 0.60  | 0.44  | 0.73 |
| BSU39350,hutH | 4042051 | 4043577 | 0.04  | 0.07  | 1.61 |
| BSU39360,hutU | 4043574 | 4045232 | 0.08  | 0.10  | 1.19 |
| BSU39370,hutI | 4045245 | 4046510 | 0.14  | 0.18  | 1.29 |
| BSU39380,hutG | 4046503 | 4047462 | 0.22  | 0.21  | 0.94 |
| BSU39390,hutM | 4047538 | 4048965 | 0.14  | 0.28  | 2.01 |
| BSU39400,pdp  | 4049009 | 4050310 | 63.68 | 34.94 | 0.55 |
| BSU39410,nupC | 4050340 | 4051521 | 49.50 | 25.12 | 0.51 |
| BSU39420,deoC | 4051602 | 4052273 | 23.81 | 14.21 | 0.60 |
| BSU39430,deoR | 4052379 | 4053320 | 2.71  | 4.62  | 1.71 |
| BSU39440,yxxB | 4053454 | 4054281 | 0.94  | 0.91  | 0.96 |
| BSU39450,yxeR | 4054354 | 4055466 | 2.02  | 1.49  | 0.74 |
| BSU39460,yxeQ | 4055536 | 4056873 | 0.72  | 0.44  | 0.61 |
| BSU39470,yxeP | 4056870 | 4058012 | 1.09  | 0.64  | 0.58 |
| BSU39480,yxeO | 4058029 | 4058778 | 1.23  | 0.65  | 0.53 |
| BSU39490,yxeN | 4058791 | 4059465 | 1.49  | 0.81  | 0.54 |
| BSU39500,yxeM | 4059488 | 4060282 | 1.81  | 0.85  | 0.47 |
| BSU39510,yxeL | 4060307 | 4060804 | 1.82  | 0.64  | 0.35 |
| BSU39520,yxeK | 4060818 | 4062143 | 1.90  | 0.66  | 0.35 |
| BSU39530,yxeJ | 4062329 | 4062556 | 0.15  | 0.20  | 1.35 |
| BSU39540,yxeI | 4062543 | 4063529 | 0.50  | 0.62  | 1.25 |
| BSU39550,yxeH | 4063684 | 4064496 | 6.16  | 6.19  | 1.00 |
| BSU39560,yxeG | 4064536 | 4065093 | 1.41  | 1.08  | 0.77 |
| BSU39570,yxeF | 4065074 | 4065508 | 1.29  | 0.94  | 0.72 |
| BSU39580,yxeE | 4065597 | 4065962 | 2.14  | 1.30  | 0.61 |
| BSU39590,yxeD | 4066210 | 4066563 | 0.14  | 0.51  | 3.62 |
| BSU39600,yxeC | 4066607 | 4067005 | 1.41  | 3.51  | 2.50 |
| BSU39610,yxeB | 4067183 | 4068148 | 11.82 | 6.54  | 0.55 |
| BSU39620,yxeA | 4068189 | 4068536 | 1.27  | 1.01  | 0.80 |
| BSU39630,yxdM | 4068550 | 4070418 | 0.90  | 0.78  | 0.86 |
| BSU39640,yxdL | 4070393 | 4071166 | 0.39  | 0.30  | 0.76 |
| BSU39650,yxdK | 4071310 | 4072287 | 6.84  | 4.44  | 0.65 |
| BSU39660,yxdJ | 4072284 | 4072973 | 3.91  | 3.16  | 0.81 |
| BSU39670,iolJ | 4073081 | 4073953 | 1.42  | 1.57  | 1.11 |
| BSU39680,iolI | 4073974 | 4074810 | 1.33  | 1.33  | 1.00 |
| BSU39690,iolH | 4074896 | 4075765 | 3.50  | 3.02  | 0.86 |
| BSU39700,iolG | 4075785 | 4076819 | 3.67  | 2.95  | 0.80 |
| BSU39710,iolF | 4076842 | 4078158 | 2.82  | 2.17  | 0.77 |
| BSU39720,iolE | 4078173 | 4079066 | 2.43  | 2.25  | 0.93 |
| BSU39730,iolD | 4079083 | 4080996 | 1.15  | 2.03  | 1.77 |
| BSU39740,iolC | 4081029 | 4082006 | 1.09  | 1.20  | 1.11 |

|               |         |         |       |       |      |
|---------------|---------|---------|-------|-------|------|
| BSU39750,iolB | 4082030 | 4082845 | 0.94  | 0.88  | 0.93 |
| BSU39760,mmsA | 4082920 | 4084383 | 1.33  | 1.06  | 0.80 |
| BSU39770,iolR | 4084799 | 4085554 | 9.88  | 7.27  | 0.74 |
| BSU39780,iolS | 4085608 | 4086540 | 20.48 | 19.60 | 0.96 |
| BSU39790,yxcE | 4086802 | 4087452 | 4.64  | 4.15  | 0.89 |
| BSU39800,yxcD | 4087456 | 4087764 | 5.93  | 4.88  | 0.82 |
| BSU39810,csbC | 4088002 | 4089387 | 0.82  | 3.31  | 4.04 |
| BSU39820,htpG | 4089429 | 4091309 | 22.77 | 11.15 | 0.49 |
| BSU39830,yxcA | 4091477 | 4091728 | 4.51  | 3.70  | 0.82 |
| BSU39840,yxbG | 4091845 | 4092666 | 0.52  | 1.64  | 3.17 |
| BSU39850,yxbF | 4092695 | 4093837 | 4.16  | 2.82  | 0.68 |
| BSU39860,aldX | 4093980 | 4095317 | 0.83  | 0.56  | 0.67 |
| BSU39870,yxbD | 4095356 | 4095835 | 0.26  | 0.19  | 0.72 |
| BSU39880,yxbC | 4095915 | 4096907 | 0.25  | 0.25  | 1.00 |
| BSU39890,yxbB | 4097416 | 4098150 | 0.00  | 0.00  | 0.00 |
| BSU39900,aslA | 4098150 | 4098419 | 0.10  | 0.12  | 1.27 |
| BSU39910,yxnB | 4098423 | 4098905 | 0.09  | 0.11  | 1.19 |
| BSU39920,asnH | 4098926 | 4101169 | 0.28  | 0.20  | 0.72 |
| BSU39930,yxaM | 4101166 | 4102365 | 0.58  | 0.38  | 0.66 |
| BSU39940,yxaL | 4102429 | 4103661 | 1.67  | 0.91  | 0.55 |
| BSU39950,yxaJ | 4103762 | 4104187 | 0.31  | 0.37  | 1.17 |
| BSU39960,yxaI | 4104444 | 4104899 | 1.97  | 5.21  | 2.64 |
| BSU39970,yxaH | 4104929 | 4106137 | 5.51  | 4.63  | 0.84 |
| BSU39980,qodI | 4106245 | 4107258 | 4.05  | 3.40  | 0.84 |
| BSU39990,yxaF | 4107352 | 4107927 | 3.18  | 1.41  | 0.44 |
| BSU40000,yxnA | 4108058 | 4109128 | 1.33  | 1.44  | 1.08 |
| BSU40010,yxaD | 4109185 | 4109616 | 4.65  | 3.37  | 0.73 |
| BSU40021,yxzK | 4109843 | 4110247 | 1.09  | 0.97  | 0.90 |
| BSU40022,yxaC | 4110217 | 4110909 | 3.18  | 3.42  | 1.08 |
| BSU40030,yxaB | 4110949 | 4111980 | 4.64  | 2.91  | 0.63 |
| BSU40040,glxK | 4112073 | 4113221 | 2.23  | 1.36  | 0.61 |
| BSU40050,gntR | 4113417 | 4114148 | 1.60  | 1.07  | 0.67 |
| BSU40060,gntK | 4114141 | 4115682 | 4.39  | 2.85  | 0.65 |
| BSU40070,gntP | 4115711 | 4117057 | 12.71 | 8.17  | 0.64 |
| BSU40080,gntZ | 4117080 | 4118486 | 26.29 | 16.40 | 0.62 |
| BSU40090,ahpC | 4118950 | 4119513 | 48.72 | 53.65 | 1.10 |
| BSU40100,ahpF | 4119527 | 4121056 | 53.60 | 54.43 | 1.02 |
| BSU40110,bglA | 4121166 | 4122605 | 2.90  | 2.07  | 0.71 |
| BSU40120,yyzE | 4122619 | 4122849 | 0.87  | 0.49  | 0.56 |
| BSU40130,yydK | 4123193 | 4123903 | 2.86  | 1.95  | 0.68 |
| BSU40139,yyzN | 4123931 | 4124089 | 4.38  | 2.79  | 0.64 |
| BSU40140,yydJ | 4124220 | 4124942 | 1.56  | 3.72  | 2.39 |
| BSU40150,yydI | 4124963 | 4125592 | 1.27  | 4.72  | 3.73 |
| BSU40160,yydH | 4125742 | 4126500 | 0.77  | 2.49  | 3.23 |
| BSU40170,yydG | 4126481 | 4127440 | 0.17  | 0.44  | 2.53 |
| BSU40180,yydF | 4127498 | 4127647 | 0.99  | 2.38  | 2.39 |
| BSU40190,fbp  | 4128029 | 4130044 | 2.58  | 2.08  | 0.81 |

|               |         |         |       |       |      |
|---------------|---------|---------|-------|-------|------|
| BSU40200,yydD | 4130578 | 4132338 | 0.90  | 2.82  | 3.13 |
| BSU40210,yydC | 4132338 | 4132736 | 0.74  | 2.63  | 3.57 |
| BSU40220,yydB | 4132729 | 4134174 | 0.78  | 3.05  | 3.91 |
| BSU40230,yydA | 4134436 | 4134915 | 1.06  | 1.87  | 1.76 |
| BSU40239,yyzF | 4134996 | 4135166 | 1.05  | 1.79  | 1.71 |
| BSU40240,yycS | 4135351 | 4135764 | 0.68  | 0.51  | 0.75 |
| BSU40250,yycR | 4135798 | 4137024 | 0.38  | 0.96  | 2.50 |
| BSU40259,yyzG | 4137087 | 4137257 | 0.08  | 0.16  | 2.02 |
| BSU40260,yycQ | 4137362 | 4137610 | 0.06  | 0.15  | 2.30 |
| BSU40270,yycP | 4137626 | 4138789 | 0.11  | 0.10  | 0.96 |
| BSU40280,yycO | 4138800 | 4139537 | 0.11  | 0.09  | 0.82 |
| BSU40290,yycN | 4139679 | 4140149 | 0.75  | 0.98  | 1.30 |
| BSU40300,rapG | 4140260 | 4141357 | 7.80  | 6.04  | 0.77 |
| BSU40310,phrG | 4141358 | 4141474 | 10.80 | 17.96 | 1.66 |
| BSU40320,argI | 4141711 | 4142601 | 10.14 | 8.10  | 0.80 |
| BSU40330,rocE | 4142675 | 4144078 | 3.67  | 2.99  | 0.81 |
| BSU40340,rocD | 4144301 | 4145506 | 1.21  | 2.16  | 1.78 |
| BSU40350,rocR | 4145747 | 4147132 | 2.33  | 3.62  | 1.55 |
| BSU40360,htrC | 4147567 | 4148769 | 45.36 | 22.88 | 0.50 |
| BSU40370,yycJ | 4148851 | 4149645 | 35.67 | 17.67 | 0.50 |
| BSU40380,yycI | 4149667 | 4150509 | 27.99 | 15.37 | 0.55 |
| BSU40390,walH | 4150496 | 4151863 | 19.40 | 9.92  | 0.51 |
| BSU40400,walK | 4151853 | 4153688 | 9.73  | 5.31  | 0.55 |
| BSU40410,walR | 4153696 | 4154403 | 7.81  | 5.33  | 0.68 |
| BSU40420,purA | 4155433 | 4156725 | 5.59  | 2.74  | 0.49 |
| BSU40430,yycE | 4156931 | 4157350 | 0.43  | 0.33  | 0.77 |
| BSU40440,dnaC | 4157471 | 4158835 | 5.35  | 2.39  | 0.45 |
| BSU40450,yycD | 4159005 | 4159205 | 0.28  | 0.67  | 2.34 |
| BSU40460,yyzB | 4159253 | 4159456 | 0.21  | 0.13  | 0.60 |
| BSU40470,yycC | 4159577 | 4159717 | 6.92  | 9.01  | 1.30 |
| BSU40480,yycB | 4159790 | 4160998 | 12.47 | 10.00 | 0.80 |
| BSU40490,yycA | 4161103 | 4163160 | 3.01  | 2.48  | 0.82 |
| BSU40500,rpII | 4163197 | 4163646 | 10.87 | 9.84  | 0.91 |
| BSU40510,yybT | 4163643 | 4165622 | 4.43  | 2.89  | 0.65 |
| BSU40520,yybS | 4165659 | 4166588 | 2.65  | 1.84  | 0.69 |
| BSU40529,yyzH | 4166815 | 4166964 | 0.49  | 1.15  | 2.34 |
| BSU40530,cotF | 4167110 | 4167592 | 0.61  | 0.55  | 0.90 |
| BSU40540,yybR | 4167622 | 4167999 | 5.61  | 3.24  | 0.58 |
| BSU40550,ppaC | 4168204 | 4169133 | 76.35 | 44.51 | 0.58 |
| BSU40560,yybP | 4169166 | 4169612 | 0.18  | 0.64  | 3.65 |
| BSU40570,yybO | 4170045 | 4171352 | 0.22  | 0.29  | 1.31 |
| BSU40580,yybN | 4173114 | 4173551 | 30.72 | 36.10 | 1.18 |
| BSU40590,yybM | 4173665 | 4174420 | 1.18  | 5.59  | 4.73 |
| BSU40600,yybL | 4174410 | 4175120 | 0.72  | 3.47  | 4.83 |
| BSU40610,yybK | 4175117 | 4175872 | 0.82  | 3.25  | 3.95 |
| BSU40620,yybJ | 4175869 | 4176525 | 1.81  | 4.65  | 2.58 |
| BSU40630,yybI | 4176900 | 4177688 | 0.38  | 0.52  | 1.40 |

|                 |         |         |         |         |      |
|-----------------|---------|---------|---------|---------|------|
| BSU40640,yybH   | 4177756 | 4178145 | 0.29    | 0.43    | 1.47 |
| BSU40650,yybG   | 4178291 | 4179130 | 4.36    | 3.37    | 0.77 |
| BSU40660,yybF   | 4179163 | 4180377 | 5.45    | 4.03    | 0.74 |
| BSU40670,yybE   | 4180564 | 4181442 | 1.53    | 1.08    | 0.70 |
| BSU40680,yybD   | 4181456 | 4181899 | 3.30    | 1.87    | 0.57 |
| BSU40690,yybC   | 4181982 | 4182461 | 2.98    | 1.52    | 0.51 |
| BSU40700,yybB   | 4182636 | 4183298 | 3.66    | 3.31    | 0.90 |
| BSU40710,yybA   | 4183445 | 4183897 | 1.82    | 1.61    | 0.88 |
| BSU40720,yyaT   | 4184017 | 4184463 | 0.94    | 0.68    | 0.72 |
| BSU40730,yyaS   | 4184460 | 4185065 | 1.20    | 0.74    | 0.62 |
| BSU40740,yyaR   | 4185160 | 4185681 | 0.22    | 0.41    | 1.83 |
| BSU40750,yyaQ   | 4186092 | 4186448 | 2.11    | 3.22    | 1.52 |
| BSU40760,yyaP   | 4186608 | 4187174 | 2.11    | 2.69    | 1.27 |
| BSU40770,tetB   | 4187681 | 4189057 | 4.19    | 3.60    | 0.86 |
| BSU40780,tetL   | 4189091 | 4189153 | 3.83    | 5.04    | 1.32 |
| BSU40790,yyaO   | 4189406 | 4189645 | 0.45    | 0.87    | 1.93 |
| BSU40800,yyaN   | 4189796 | 4190212 | 0.10    | 0.20    | 2.06 |
| BSU40810,yyaM   | 4190209 | 4191126 | 0.22    | 0.37    | 1.64 |
| BSU40820,yyaL   | 4191198 | 4193267 | 5.99    | 5.62    | 0.94 |
| BSU40830,yyaK   | 4193264 | 4194163 | 13.72   | 12.87   | 0.94 |
| BSU40840,yyaJ   | 4194389 | 4195744 | 1.11    | 1.25    | 1.13 |
| BSU40850,maa    | 4195778 | 4196332 | 1.28    | 1.93    | 1.51 |
| BSU40860,yyaH   | 4196350 | 4196730 | 0.93    | 1.12    | 1.21 |
| BSU40870,ccpB   | 4196786 | 4197721 | 0.87    | 1.33    | 1.53 |
| BSU40880,exoAA  | 4197780 | 4198538 | 0.43    | 0.32    | 0.76 |
| BSU40890,rpsR   | 4198603 | 4198842 | 1493.65 | 1676.22 | 1.12 |
| BSU40900,ssbA   | 4198886 | 4199404 | 1459.29 | 1382.31 | 0.95 |
| BSU40910,rpsF   | 4199445 | 4199732 | 205.46  | 103.94  | 0.51 |
| BSU40920,yyaF   | 4199843 | 4200943 | 34.72   | 23.97   | 0.69 |
| BSU40930,yyaE   | 4201070 | 4203073 | 2.98    | 3.02    | 1.01 |
| BSU40939,yyzM   | 4203124 | 4203330 | 1.36    | 2.12    | 1.55 |
| BSU40940,yyaD   | 4203424 | 4204440 | 0.08    | 0.07    | 0.94 |
| BSU40950,yyaC   | 4204900 | 4205517 | 0.63    | 1.33    | 2.11 |
| BSU40960,parB   | 4205556 | 4206404 | 6.91    | 8.96    | 1.30 |
| BSU40970,parA   | 4206397 | 4207158 | 6.02    | 8.35    | 1.39 |
| BSU40980,yyaB   | 4207406 | 4207846 | 0.29    | 0.71    | 2.48 |
| BSU40990,noc    | 4207897 | 4208748 | 18.29   | 10.96   | 0.60 |
| BSU41000,gidB   | 4208870 | 4209589 | 17.58   | 9.33    | 0.53 |
| BSU41010,gidA   | 4209603 | 4211489 | 19.21   | 11.41   | 0.59 |
| BSU41020,trmE   | 4211510 | 4212889 | 16.08   | 10.05   | 0.63 |
| BSU41030,jag    | 4213200 | 4213826 | 76.43   | 35.23   | 0.46 |
| BSU41040,spolIJ | 4213823 | 4214608 | 48.21   | 27.47   | 0.57 |
| BSU41050,rnpA   | 4214753 | 4215103 | 12.18   | 6.41    | 0.53 |
| BSU41060,rpmH   | 4215255 | 4215389 | 195.71  | 101.80  | 0.52 |

**P value**

0.01  
0.06  
0.02  
0.03  
0.02  
0.04  
0.04  
0.33  
0.00  
0.00  
0.99  
0.34  
0.05  
0.19  
0.40  
0.52  
0.05  
0.02  
0.01  
0.20  
0.04  
0.13  
0.39  
0.85  
0.11  
0.85  
0.08  
0.03  
0.47  
0.62  
0.67  
0.10  
0.63  
0.09  
0.89  
0.31  
0.08  
0.82  
0.01  
0.01  
0.01  
0.01  
0.53

0.19  
0.03  
0.10  
0.09  
0.21  
0.12  
0.01  
0.00  
0.15  
0.40  
0.64  
0.10  
0.17  
0.02  
0.00  
0.02  
0.28  
0.37  
0.57  
0.22  
0.01  
0.07  
0.01  
0.82  
0.64  
0.40  
0.02  
0.01  
0.08  
0.83  
0.24  
0.18  
0.04  
0.07  
0.03  
0.10  
0.52  
0.27  
0.37  
0.06  
0.40  
0.71  
0.98  
0.12  
0.11  
0.09  
0.02

0.72  
0.32  
0.02  
0.20  
0.35  
0.04  
0.15  
0.52  
0.15  
0.97  
0.07  
0.12  
0.05  
0.03  
0.05  
0.39  
0.03  
0.11  
0.01  
0.06  
0.11  
0.09  
0.12  
0.15  
0.07  
0.01  
0.01  
0.01  
0.03  
0.01  
0.01  
0.01  
0.02  
0.02  
0.02  
0.00  
0.00  
0.00  
0.00  
0.01  
0.00  
0.00  
0.01  
0.01  
0.01  
0.02  
0.03



0.00  
0.00  
0.02  
0.01  
0.02  
0.03  
0.05  
0.10  
0.06  
0.23  
0.37  
0.32  
0.50  
0.30  
0.07  
0.13  
0.14  
0.98  
0.05  
0.09  
0.16  
0.04  
0.70  
0.34  
0.86  
0.72  
0.98  
0.65  
0.22  
0.14  
0.07  
0.06  
0.01  
0.00  
0.03  
0.01  
0.02  
0.14  
0.28  
0.11  
0.58  
0.01  
0.12  
0.12  
0.42  
0.75  
0.56

0.97  
0.98  
0.74  
0.86  
0.05  
0.95  
0.24  
0.91  
0.12  
0.11  
0.17  
0.17  
0.24  
0.31  
0.73  
0.63  
0.67  
0.27  
0.33  
0.27  
0.82  
0.09  
0.03  
0.02  
0.37  
0.39  
0.28  
0.32  
0.67  
0.10  
0.38  
0.76  
0.26  
0.08  
0.90  
0.99  
0.08  
0.14  
0.10  
0.12  
0.56  
0.00  
0.03  
0.05  
0.00  
0.13  
0.23

0.04  
0.05  
0.61  
0.54  
0.58  
0.85  
0.66  
0.06  
0.01  
0.91  
0.77  
0.80  
0.19  
0.62  
0.47  
0.93  
0.81  
0.51  
0.23  
0.00  
0.51  
0.41  
0.58  
0.28  
0.83  
0.26  
0.22  
0.51  
0.01  
0.21  
0.02  
0.00  
0.40  
0.67  
0.05  
0.09  
0.11  
0.59  
0.08  
0.05  
0.11  
0.07  
0.42  
0.21  
0.39  
0.01  
0.10

0.01  
0.03  
0.11  
0.93  
0.26  
0.27  
0.09  
0.85  
0.20  
0.21  
0.07  
0.11  
0.18  
0.20  
0.01  
0.00  
0.00  
0.74  
0.75  
0.09  
0.21  
0.18  
0.03  
0.04  
0.02  
0.06  
0.43  
0.42  
0.00  
0.22  
0.16  
0.11  
0.13  
0.98  
0.22  
0.56  
0.29  
0.42  
0.90  
0.07  
0.81  
0.46  
0.39  
0.04  
0.03  
0.20  
0.05

0.01  
0.64  
0.01  
0.35  
0.25  
0.61  
0.56  
0.30  
0.99  
0.94  
0.51  
0.30  
0.00  
0.01  
0.12  
0.61  
0.08  
0.86  
0.59  
0.02  
0.02  
0.02  
0.29  
0.62  
0.65  
0.95  
0.52  
0.53  
0.03  
0.04  
0.19  
0.02  
0.01  
0.26  
0.14  
0.14  
0.17  
0.74  
0.29  
0.22  
0.05  
0.06  
0.02  
0.08  
0.19  
0.63  
0.14

0.40  
0.66  
0.45  
0.55  
0.93  
0.07  
0.08  
0.04  
0.02  
0.67  
0.72  
0.91  
0.36  
0.01  
0.03  
0.90  
0.32  
0.29  
0.06  
0.77  
0.35  
0.07  
0.27  
0.08  
0.02  
0.38  
0.24  
0.11  
0.22  
0.32  
0.04  
0.08  
0.01  
0.07  
0.09  
0.87  
0.04  
0.03  
0.05  
0.00  
0.02  
0.10  
0.39  
0.00  
0.02  
0.07  
0.11

0.52  
0.03  
0.62  
0.39  
0.38  
0.04  
0.12  
0.09  
0.01  
0.17  
0.06  
0.06  
0.09  
0.03  
0.03  
0.00  
0.03  
0.26  
0.53  
0.44  
0.41  
0.37  
0.37  
0.99  
0.41  
0.00  
0.01  
0.06  
0.40  
0.33  
0.39  
0.97  
0.21  
0.40  
0.21  
0.40  
0.06  
0.95  
0.13  
0.43  
0.04  
0.59  
0.12  
0.47  
0.02  
0.04  
0.02





0.19  
0.08  
0.06  
0.06  
0.00  
0.46  
0.21  
0.63  
0.03  
0.00  
0.52  
0.23  
0.14  
0.17  
0.07  
0.49  
0.30  
0.02  
0.06  
0.27  
0.89  
0.17  
0.35  
0.22  
0.16  
0.44  
0.53  
0.06  
0.04  
0.62  
0.46  
0.57  
0.11  
0.17  
0.47  
0.27  
0.44  
0.18  
0.06  
0.61  
0.15  
0.30  
0.03  
0.35  
0.02  
0.01  
0.04

0.67  
0.75  
0.56  
0.59  
0.69  
0.57  
0.69  
0.84  
0.06  
0.03  
0.72  
0.40  
0.16  
0.46  
0.88  
0.07  
0.12  
0.19  
0.15  
0.19  
0.19  
0.09  
0.07  
0.97  
0.76  
0.66  
0.00  
0.02  
0.01  
0.80  
0.01  
0.53  
0.24  
0.19  
0.21  
0.42  
0.10  
0.02  
0.09  
0.05  
0.49  
0.04  
0.02  
0.04  
0.00  
0.64  
0.79

0.02  
0.02  
0.65  
0.53  
0.38  
0.72  
0.29  
0.19  
0.40  
0.81  
0.02  
0.08  
0.11  
0.32  
0.41  
0.08  
0.02  
0.42  
0.04  
0.45  
0.98  
0.98  
0.32  
0.42  
0.06  
0.25  
0.29  
0.05  
0.62  
0.66  
0.21  
0.12  
0.80  
0.02  
0.57  
0.19  
0.22  
0.20  
0.15  
0.04  
0.36  
0.08  
0.46  
0.29  
0.17  
0.54  
0.50

0.62  
0.07  
0.06  
0.02  
0.01  
0.01  
0.00  
0.00  
0.01  
0.01  
0.91  
0.23  
0.06  
0.17  
0.22  
0.33  
0.02  
0.21  
0.10  
0.08  
0.15  
0.38  
0.05  
0.03  
0.65  
0.14  
0.13  
0.65  
0.13  
0.08  
0.04  
0.11  
0.32  
0.05  
0.00  
0.01  
0.09  
0.04  
0.24  
0.54  
0.89  
0.37  
0.22  
0.02  
0.14  
0.09  
0.60

0.20  
0.59  
0.72  
0.92  
0.55  
0.59  
0.13  
0.12  
0.18  
0.60  
0.61  
0.77  
0.64  
0.60  
0.69  
0.87  
0.28  
0.20  
0.74  
0.56  
0.64  
0.48  
0.03  
0.55  
0.53  
0.26  
0.52  
0.83  
0.03  
0.30  
0.19  
0.03  
0.11  
0.53  
0.02  
0.69  
0.12  
0.65  
0.89  
0.99  
0.35  
0.22  
0.16  
0.02  
0.05  
0.04  
0.04

0.64  
0.90  
0.81  
0.58  
0.07  
0.04  
0.02  
0.71  
0.47  
0.02  
0.03  
0.47  
0.52  
0.47  
0.22  
0.20  
0.40  
0.40  
0.12  
0.39  
0.32  
0.62  
0.53  
0.03  
0.08  
0.80  
0.71  
0.97  
0.31  
0.28  
0.60  
0.63  
0.02  
0.01  
0.05  
0.01  
0.07  
0.10  
0.26  
0.32  
0.78  
0.07  
0.33  
0.44  
0.34  
0.05  
0.34

0.03  
0.08  
0.79  
0.18  
0.04  
0.01  
0.24  
0.17  
0.13  
0.02  
0.90  
0.27  
0.08  
0.32  
0.19  
0.11  
0.92  
0.00  
0.06  
0.33  
0.74  
0.75  
0.10  
0.07  
0.15  
0.23  
0.71  
0.34  
0.12  
0.08  
0.03  
0.00  
0.25  
0.02  
0.12  
0.24  
0.08  
0.06  
0.02  
0.21  
0.28  
0.35  
0.70  
0.05  
0.04  
0.55  
0.54

0.80  
0.45  
0.16  
0.15  
0.06  
0.09  
0.10  
0.10  
0.24  
0.07  
0.97  
0.42  
0.40  
0.00  
0.66  
0.11  
0.08  
0.01  
0.45  
0.51  
0.29  
0.55  
0.55  
0.41  
0.79  
0.63  
0.17  
0.37  
0.00  
0.04  
0.77  
0.73  
0.51  
0.17  
0.04  
0.77  
0.10  
0.07  
0.03  
0.99  
0.08  
0.85  
0.01  
1.00  
0.09  
0.20  
0.53



0.36  
0.00  
0.94  
0.00  
0.48  
0.69  
0.61  
0.36  
0.70  
0.09  
0.31  
0.17  
0.98  
0.51  
0.06  
0.22  
0.38  
0.37  
0.59  
0.61  
0.71  
0.90  
0.69  
0.54  
0.76  
0.30  
0.51  
0.49  
0.45  
0.44  
0.50  
0.63  
0.50  
0.02  
0.29  
0.14  
0.17  
0.10  
0.04  
0.10  
0.15  
0.05  
0.14  
0.00  
0.22  
0.15  
0.02

0.02  
0.00  
0.64  
0.12  
0.57  
0.13  
0.06  
0.03  
0.05  
0.04  
0.00  
0.05  
0.30  
0.41  
0.25  
0.04  
0.00  
0.00  
0.03  
0.50  
0.02  
0.05  
0.00  
0.01  
0.03  
0.02  
0.34  
0.34  
0.22  
0.72  
0.03  
0.03  
0.48  
0.32  
0.09  
0.29  
0.05  
0.00  
0.39  
0.03  
0.07  
0.50  
0.62  
0.45  
0.46  
0.22  
0.48

0.09  
0.15  
0.03  
0.13  
0.00  
0.05  
0.29  
0.16  
0.01  
0.24  
0.61  
0.76  
0.34  
0.22  
0.19  
0.09  
0.19  
0.02  
0.18  
0.19  
0.67  
0.28  
0.45  
0.19  
0.09  
0.82  
0.54  
0.00  
0.01  
0.04  
0.92  
0.48  
0.53  
0.09  
0.73  
0.19  
0.33  
0.04  
0.01  
0.01  
0.06  
0.31  
0.03  
0.77  
0.07  
0.46  
0.61

0.38  
0.80  
0.53  
0.24  
0.04  
0.55  
0.16  
0.28  
0.11  
0.18  
0.05  
0.58  
0.01  
0.70  
0.39  
0.61  
0.00  
0.87  
0.55  
0.27  
0.05  
0.04  
0.23  
0.42  
0.47  
0.25  
0.03  
0.02  
0.22  
0.87  
0.16  
0.32  
0.24  
0.03  
0.09  
0.08  
0.31  
0.67  
0.87  
0.17  
0.58  
0.75  
0.08  
0.05  
0.04  
0.22  
0.25

0.54  
0.37  
0.60  
0.47  
0.13  
0.25  
0.00  
0.10  
0.00  
0.82  
0.87  
0.29  
0.10  
0.01  
0.45  
0.12  
0.08  
0.07  
0.30  
0.55  
0.56  
0.77  
0.92  
0.47  
0.55  
0.82  
0.95  
0.74  
0.08  
0.10  
0.25  
0.52  
0.01  
0.20  
0.05  
0.20  
0.95  
0.53  
0.10  
0.02  
0.13  
0.33  
0.08  
0.03  
0.09  
0.27  
0.58

0.66  
0.15  
0.03  
0.00  
0.47  
0.78  
0.83  
1.00  
0.62  
0.20  
0.05  
0.61  
0.51  
0.15  
0.66  
0.07  
0.06  
0.00  
0.02  
0.05  
0.70  
0.38  
0.26  
0.38  
0.51  
0.40  
0.84  
0.13  
0.02  
0.04  
0.03  
0.01  
0.04  
0.51  
0.65  
0.92  
0.23  
0.59  
0.28  
0.33  
0.06  
0.05  
0.02  
0.04  
0.43  
0.00  
0.13

0.16  
0.02  
0.17  
0.15  
0.07  
0.09  
0.10  
0.42  
0.17  
0.15  
0.40  
0.06  
0.30  
0.48  
0.45  
0.44  
0.98  
0.62  
0.66  
0.11  
0.69  
0.01  
0.78  
0.00  
0.00  
0.00  
0.05  
0.05  
0.06  
0.15  
0.12  
0.96  
0.32  
0.63  
0.43  
0.03  
0.06  
0.30  
0.02  
0.02  
0.56  
0.96  
0.32  
0.33  
0.36  
0.97  
0.59

0.59  
0.00  
0.54  
0.21  
0.71  
0.24  
0.45  
0.18  
0.72  
0.14  
0.74  
0.40  
0.38  
0.06  
0.09  
0.43  
0.04  
0.13  
0.62  
0.17  
0.18  
0.17  
0.53  
0.13  
0.52  
0.97  
0.09  
0.16  
0.67  
0.93  
0.02  
0.61  
0.45  
0.56  
0.15  
0.10  
0.71  
0.87  
0.04  
0.54  
0.64  
0.24  
0.04  
0.50  
0.29  
0.19  
0.10



0.22  
0.55  
0.34  
0.29  
0.19  
0.18  
0.24  
0.06  
0.06  
0.10  
0.06  
0.04  
0.06  
0.08  
0.01  
0.00  
0.03  
0.03  
0.07  
0.20  
0.54  
0.34  
0.03  
0.11  
0.15  
0.18  
0.05  
0.05  
0.35  
0.28  
0.16  
0.19  
0.21  
0.12  
0.17  
0.22  
0.34  
0.27  
0.39  
0.04  
0.21  
0.89  
0.17  
0.22  
0.08  
0.39  
0.36

0.30  
0.99  
0.89  
0.60  
0.31  
0.27  
0.36  
0.20  
0.08  
0.37  
0.59  
0.80  
0.03  
0.69  
0.33  
0.31  
0.08  
0.44  
0.31  
0.10  
0.32  
0.03  
0.02  
0.46  
0.35  
0.25  
0.22  
0.02  
0.53  
0.35  
0.10  
0.31  
0.58  
0.14  
0.69  
0.03  
0.03  
0.52  
0.90  
0.02  
0.45  
0.05  
0.76  
0.59  
0.90  
0.89  
0.11

0.59  
0.68  
0.09  
0.02  
0.19  
0.25  
0.30  
0.93  
0.33  
0.16  
0.76  
0.08  
0.02  
0.08  
0.02  
0.38  
0.13  
0.22  
0.12  
0.14  
0.03  
0.02  
0.04  
0.02  
0.02  
0.02  
0.16  
0.53  
0.83  
0.02  
0.03  
0.00  
0.01  
0.37  
0.90  
0.02  
0.07  
0.10  
0.15  
0.11  
0.02  
0.16  
0.02  
0.44  
0.87  
0.03  
0.06

0.09  
0.70  
0.61  
0.15  
0.75  
0.61  
0.65  
0.02  
0.00  
0.02  
0.02  
0.03  
0.03  
0.10  
0.03  
0.30  
0.12  
0.65  
0.07  
0.74  
0.62  
0.01  
0.10  
0.29  
0.33  
0.08  
0.56  
0.20  
0.12  
0.08  
0.04  
0.62  
0.63  
0.12  
0.13  
0.25  
0.59  
0.54  
0.60  
0.17  
0.18  
0.06  
0.10  
0.97  
0.24  
0.00  
0.10

0.02  
0.02  
0.11  
0.17  
0.09  
0.03  
0.26  
0.13  
0.09  
0.10  
0.03  
0.02  
0.24  
0.19  
0.03  
0.21  
0.13  
0.14  
0.01  
0.32  
0.09  
0.10  
0.18  
0.15  
0.10  
0.50  
0.05  
0.59  
0.47  
0.02  
0.92  
0.35  
0.32  
0.14  
0.07  
0.23  
0.51  
0.19  
0.12  
0.00  
0.35  
0.14  
0.35  
0.06  
0.95  
0.00  
0.27

0.01  
0.02  
0.01  
0.03  
0.01  
0.61  
0.33  
0.33  
0.42  
0.50  
1.00  
0.76  
0.14  
0.96  
0.01  
0.03  
0.06  
0.08  
0.75  
0.28  
0.15  
0.43  
0.57  
0.27  
0.79  
0.57  
0.85  
0.36  
0.29  
0.24  
0.09  
0.10  
0.69  
0.52  
0.48  
0.76  
0.56  
0.14  
0.48  
0.10  
0.29  
0.37  
0.00  
0.08  
0.00  
0.27  
0.32

0.14  
0.02  
0.01  
0.01  
0.02  
0.03  
0.00  
0.07  
0.01  
0.75  
0.56  
0.07  
0.25  
0.35  
0.42  
0.18  
0.64  
0.09  
0.70  
0.07  
0.42  
0.55  
0.00  
0.46  
0.06  
0.73  
0.84  
0.07  
0.24  
0.01  
0.17  
0.20  
0.25  
0.26  
0.32  
0.49  
0.54  
0.44  
0.47  
0.52  
0.02  
0.02  
0.00  
0.00  
0.01  
0.01  
0.01

0.50  
0.12  
0.86  
0.52  
0.28  
0.23  
0.07  
0.04  
0.30  
0.32  
0.32  
0.80  
0.30  
0.13  
0.42  
0.43  
0.08  
0.06  
0.60  
0.58  
0.17  
0.13  
0.53  
0.12  
0.28  
0.35  
0.16  
0.16  
0.54  
0.00  
0.01  
0.02  
0.24  
0.28  
0.15  
0.18  
0.14  
0.28  
0.06  
0.04  
0.06  
0.03  
0.58  
0.90  
0.54  
0.36  
0.43



0.14  
0.01  
0.02  
0.01  
0.54  
0.51  
0.33  
0.01  
0.00  
0.00  
0.08  
0.01  
0.01  
0.02  
0.01  
0.01  
0.01  
0.03  
0.04  
0.10  
0.08  
0.08  
0.10  
0.06  
0.07  
0.12  
0.17  
0.16  
0.17  
0.15  
0.17  
0.15  
0.18  
0.17  
0.14  
0.16  
0.15  
0.10  
0.08  
0.00  
0.01  
0.21  
0.13  
0.99  
0.78  
0.05  
0.07

0.05  
0.04  
0.00  
0.00  
0.01  
0.01  
0.06  
0.08  
0.16  
0.94  
0.01  
0.22  
0.17  
0.01  
0.06  
0.20  
0.57  
0.72  
0.01  
0.67  
0.86  
0.06  
0.57  
0.63  
0.59  
0.02  
0.05  
0.81  
0.56  
0.45  
0.32  
0.80  
0.08  
0.10  
0.11  
0.00  
0.26  
0.02  
0.18  
0.12  
0.09  
0.03  
0.15  
0.27  
0.03  
0.05  
0.17

0.73  
0.41  
0.02  
0.04  
0.18  
0.24  
0.30  
0.31  
0.26  
0.28  
0.28  
0.27  
0.19  
0.06  
0.06  
0.12  
0.10  
0.10  
0.00  
0.61  
0.18  
0.34  
0.05  
0.04  
0.85  
0.93  
0.49  
0.04  
0.48  
0.75  
0.28  
0.11  
0.10  
0.86  
0.30  
0.24  
0.39  
0.14  
0.23  
0.25  
0.00  
0.13  
0.13  
0.06  
0.17  
0.00  
0.01

0.04  
0.05  
0.05  
0.07  
0.00  
0.38  
0.06  
0.03  
0.13  
0.05  
0.07  
0.38  
0.20  
0.46  
0.05  
0.02  
0.22  
0.06  
0.01  
0.03  
0.01  
0.69  
0.35  
0.21  
0.46  
0.89  
0.30  
0.08  
0.02  
0.01  
0.20  
0.16  
0.23  
0.33  
0.36  
0.31  
0.98  
0.56  
0.00  
0.42  
0.72  
0.17  
0.89  
0.41  
0.14  
0.12  
0.48

0.83  
0.16  
0.01  
0.00  
0.30  
0.28  
0.58  
0.93  
0.85  
0.69  
0.21  
0.02  
0.04  
0.03  
0.05  
0.02  
0.28  
0.03  
0.00  
0.04  
0.54  
0.01  
0.00  
0.11  
0.63  
0.83  
0.00  
0.90  
0.85  
0.64  
0.47  
0.86  
0.46  
0.03  
0.07  
0.08  
0.00  
0.00  
0.02  
0.03  
0.37  
0.90  
0.07  
0.52  
0.01  
0.02  
0.40

0.01  
0.00  
0.34  
0.39  
0.83  
0.13  
0.21  
0.40  
0.49  
0.13  
0.04  
0.10  
0.14  
0.04  
0.07  
0.97  
0.23  
0.07  
0.11  
0.26  
0.15  
0.08  
0.11  
0.47  
0.59  
0.38  
0.17  
0.76  
1.00  
0.82  
0.15  
0.87  
0.92  
0.83  
0.11  
0.03  
0.27  
0.14  
0.92  
0.13  
0.28  
0.07  
0.54  
0.07  
0.05  
0.09  
0.08

0.16  
0.13  
0.07  
0.04  
0.02  
0.45  
0.01  
0.07  
0.05  
0.02  
0.11  
0.05  
0.09  
0.59  
0.22  
0.50  
0.03  
0.75  
0.01  
0.75  
0.27  
0.21  
0.48  
0.25  
0.00  
0.10  
0.67  
0.52  
0.80  
0.11  
0.48  
0.59  
0.96  
0.02  
0.22  
0.21  
0.26  
0.08  
0.12  
0.63  
0.63  
0.15  
0.14  
0.13  
0.00  
0.92  
0.15

0.09  
0.14  
0.06  
0.13  
0.22  
0.75  
0.93  
0.01  
0.01  
0.18  
0.15  
0.16  
0.85  
0.25  
0.42  
0.27  
0.10  
0.47  
0.15  
0.71  
0.82  
0.46  
0.81  
0.43  
0.48  
0.01  
0.00  
0.04  
0.02  
0.98  
0.58  
0.55  
0.56  
0.03  
0.16  
0.38  
0.02  
0.05  
0.00  
0.00  
0.05  
0.01  
0.06  
0.52  
0.90  
0.00  
0.00











0.00  
0.00  
0.00  
0.00  
0.00  
0.00  
0.00  
0.00  
0.00  
0.09  
0.06  
0.21  
0.77  
0.39  
0.33  
0.42  
0.02  
0.02  
0.01  
0.23  
0.02  
0.04  
0.59  
0.36  
0.81  
0.37  
0.02  
0.78  
0.24  
0.39  
0.00  
0.00  
0.05  
0.38  
0.01  
0.16  
0.90  
0.06  
0.10  
0.15  
0.06  
0.08  
0.00  
0.04  
0.05  
0.16

0.37  
0.20  
0.40  
0.40  
0.26  
0.13  
0.08  
0.08  
0.08  
0.30  
0.98  
0.08  
0.11  
0.85  
0.01  
0.38  
0.08  
0.12  
0.01  
0.02  
0.33  
0.75  
0.44  
0.16  
0.17  
0.00  
0.16  
0.00  
0.01  
0.07  
0.25  
0.16  
0.17  
0.10  
0.70  
0.92  
0.42  
0.17  
0.03  
0.00  
0.01  
0.02  
0.05  
0.40  
0.80  
0.87  
0.96

0.52  
0.01  
0.12  
0.02  
0.14  
0.18  
0.24  
0.01  
0.12  
0.09  
0.40  
0.18  
0.41  
0.37  
0.34  
0.34  
0.37  
0.28  
0.07  
0.13  
0.18  
0.15  
0.04  
0.57  
0.13  
0.11  
0.60  
0.99  
0.57  
0.55  
0.20  
0.10  
0.12  
0.02  
0.02  
0.16  
0.01  
0.00  
0.00  
0.01  
0.01  
0.97  
0.13  
0.07  
0.18  
0.31  
0.44

0.19  
0.44  
0.20  
0.00  
0.05  
0.26  
0.12  
0.16  
0.22  
0.85  
0.52  
0.10  
0.01  
0.01  
0.75  
0.16  
0.03  
0.06  
0.08  
0.05  
0.76  
0.01  
0.09  
0.12  
0.10  
0.02  
0.01  
0.01  
0.02  
0.06  
0.18  
0.16  
0.43  
0.47  
0.16  
0.83  
0.00  
0.04  
0.85  
0.89  
0.26  
0.14  
0.03  
0.14  
0.00  
0.00  
0.04



0.14  
0.00  
0.20  
0.83  
0.77  
0.66  
0.42  
0.03  
0.03  
0.43  
0.05  
0.31  
0.64  
0.58  
0.16  
0.07  
0.90  
0.68  
0.41  
0.18  
0.20  
0.05  
0.24  
0.33  
0.02  
0.33  
0.20  
0.17  
0.05  
0.53  
0.86  
0.22  
0.01  
0.34  
0.32  
0.34  
0.51  
0.42  
0.48  
0.74  
0.12  
0.62  
0.11  
0.10  
0.27  
0.79  
0.35

0.30  
0.04  
0.06  
0.47  
0.10  
0.19  
0.25  
0.09  
0.01  
0.00  
0.00  
0.12  
0.51  
0.01  
0.13  
0.00  
0.00  
0.00  
0.01  
0.01  
0.01  
0.05  
0.04  
0.43  
0.46  
0.79  
0.68  
0.96  
0.88  
0.94  
0.06  
0.13  
0.13  
0.31  
0.22  
0.16  
0.08  
0.01  
0.28  
0.26  
0.02  
0.05  
0.03  
0.65  
0.94  
0.15  
0.09

0.19  
0.50  
0.89  
0.87  
0.98  
0.00  
0.00  
0.93  
0.78  
0.65  
0.18  
0.82  
0.11  
0.63  
0.84  
0.81  
0.43  
0.50  
0.14  
0.43  
0.00  
0.01  
0.02  
0.84  
0.06  
0.70  
0.10  
0.03  
0.02  
0.01  
0.77  
0.19  
0.09  
0.27  
0.44  
0.11  
0.09  
0.05  
0.04  
0.42  
0.40  
0.24  
0.28  
0.20  
0.47  
0.06  
0.26

0.08  
0.59  
0.03  
0.03  
0.07  
0.68  
0.14  
0.18  
0.19  
0.03  
0.05  
0.03  
0.02  
0.74  
0.72  
0.66  
0.70  
0.67  
0.02  
0.00  
0.09  
0.30  
0.19  
0.24  
0.21  
0.22  
0.01  
0.90  
0.55  
0.01  
0.05  
0.01  
0.00  
0.85  
0.02  
0.01  
0.01  
0.24  
0.14  
0.05  
0.08  
0.10  
0.00  
0.05  
0.24  
0.61  
0.02

0.62  
0.91  
0.96  
0.26  
0.30  
0.06  
0.19  
0.62  
0.83  
0.62  
0.56  
0.19  
0.77  
0.82  
0.35  
0.08  
0.20  
0.66  
0.07  
0.13  
0.91  
0.21  
0.01  
0.03  
0.63  
0.21  
0.86  
0.40  
0.03  
0.44  
0.21  
0.19  
0.47  
0.11  
0.09  
0.14  
0.03  
0.03  
0.03  
0.06  
0.01  
0.04  
0.00  
0.72  
0.27  
0.04  
0.26



0.00  
0.00  
0.00  
0.00  
0.00  
0.00  
0.00  
0.00  
0.00  
0.00  
0.00  
0.00  
0.00  
0.00  
0.00  
0.00  
0.05  
0.14  
0.11  
0.13  
0.03  
0.03  
0.01  
0.00  
0.25  
0.27  
0.22  
0.26  
0.31  
0.11  
0.16  
0.43  
0.14  
0.05  
0.06  
0.60  
0.50  
0.41  
0.01  
0.06  
0.09  
0.42  
0.21  
0.14  
0.17  
0.56

0.74  
0.15  
0.08  
0.49  
0.00  
0.01  
0.72  
0.01  
0.01  
0.08  
0.47  
1.00  
0.12  
0.26  
0.83  
0.09  
0.43  
0.03  
0.03  
0.13  
0.06  
0.07  
0.06  
0.94  
0.40  
0.21  
0.08  
0.14  
0.67  
0.64  
0.52  
0.51  
0.48  
0.40  
0.28  
0.08  
0.32  
0.24  
0.25  
0.86  
0.00  
0.01  
0.03  
0.02  
0.43  
0.29  
0.09



0.10  
0.34  
0.04  
0.01  
0.10  
0.80  
0.51  
0.44  
0.21  
0.39  
0.38  
0.14  
0.72  
0.20  
0.05  
0.02  
0.02  
0.04  
0.02  
0.62  
0.63  
0.62  
0.23  
0.31  
0.56  
0.83  
0.00  
0.68  
0.65  
0.31  
0.07  
0.37  
0.00  
0.08  
0.11  
0.10  
0.12  
0.05  
0.86  
0.23  
0.04  
0.50  
0.46  
0.76  
0.03  
0.03  
0.07

0.30  
0.07  
0.22  
0.02  
0.95  
0.92  
0.38  
0.85  
0.37  
0.44  
0.26  
0.68  
0.11  
0.06  
0.21  
0.35  
0.94  
0.88  
0.33  
0.65  
0.06  
0.36  
0.90  
0.80  
0.93  
0.16  
0.39  
0.60  
0.87  
0.18  
0.21  
0.16  
0.89  
0.22  
0.10  
0.53  
0.09  
0.09  
0.04  
0.08  
0.08  
0.09  
0.12  
0.33  
0.93  
0.37  
0.97

0.62  
0.02  
0.02  
0.43  
0.29  
0.28  
0.30  
0.30  
0.89  
0.60  
0.16  
0.52  
0.09  
0.45  
0.00  
0.09  
0.26  
0.26  
0.25  
0.19  
0.29  
0.27  
0.26  
0.93  
0.76  
0.41  
0.15  
0.12  
0.01  
0.15  
0.02  
0.09  
0.37  
0.28  
0.51  
0.51  
0.78  
0.03  
0.23  
0.94  
0.04  
0.02  
0.27  
0.19  
0.15  
0.67  
0.15

0.38  
0.20  
0.12  
0.61  
0.24  
0.18  
0.26  
0.43  
0.25  
0.38  
0.69  
0.02  
0.04  
0.19  
0.17  
0.29  
0.32  
0.42  
0.99  
0.87  
0.70  
0.84  
0.74  
0.69  
0.04  
0.07  
0.35  
0.23  
0.03  
0.04  
0.03  
0.11  
0.02  
0.07  
0.93  
0.87  
0.11  
0.14  
0.17  
0.14  
0.09  
0.01  
0.14  
0.01  
0.02  
0.37  
0.20

0.58  
0.30  
0.21  
0.12  
0.01  
0.20  
0.01  
0.00  
0.06  
0.04  
0.58  
0.66  
0.62  
0.10  
0.03  
0.14  
0.18  
0.62  
0.19  
0.42  
0.16  
0.14  
0.26  
0.01  
0.31  
0.60  
0.79  
0.89  
0.64  
0.81  
0.91  
0.89  
0.93  
0.54  
0.56  
0.91  
0.67  
0.69  
0.26  
0.08  
0.02  
0.03  
0.02  
0.04  
0.40  
0.68  
0.04

0.36  
0.54  
0.12  
0.16  
0.19  
0.86  
0.31  
0.08  
0.07  
0.77  
0.44  
0.24  
0.05  
0.11  
0.27  
0.12  
0.01  
0.05  
0.38  
0.83  
0.20  
0.17  
0.18  
0.34  
0.38  
0.31  
0.00  
0.18  
0.19  
0.08  
0.07  
0.01  
0.30  
0.29  
0.03  
0.37  
0.22  
0.13  
0.00  
0.02  
0.04  
0.04  
0.05  
0.09  
0.35  
0.40  
0.07

0.05  
0.41  
0.03  
0.28  
0.32  
0.09  
0.80  
0.02  
0.13  
0.04  
0.84  
0.61  
0.29  
0.28  
0.28  
0.57  
0.03  
0.00  
0.04  
0.54  
0.90  
0.97  
0.98  
0.54  
0.87  
0.87  
0.33  
0.87  
0.80  
0.62  
0.85  
0.35  
0.12  
0.13  
0.41  
0.12  
0.07  
0.01  
0.33  
0.42  
0.09  
0.30  
0.39  
0.43  
0.67  
0.55  
0.61

0.92  
0.54  
0.06  
0.08  
0.69  
0.49  
0.88  
0.37  
0.03  
0.06  
0.01  
0.25  
0.44  
0.60  
0.00  
0.51  
0.17  
0.96  
0.05  
0.38  
0.50  
0.96  
0.47  
0.12  
0.27  
0.24  
0.14  
0.52  
0.42  
0.42  
0.41  
0.44  
0.01  
0.03  
0.79  
0.97  
0.67  
0.37  
0.02  
0.89  
0.92  
0.94  
0.63  
0.74  
0.53  
0.85  
0.65



0.63  
0.67  
0.56  
0.18  
0.62  
0.78  
0.03  
0.43  
0.58  
0.98  
0.33  
0.05  
0.43  
0.49  
0.21  
0.00  
0.03  
0.09  
0.01  
0.17  
0.04  
0.54  
0.00  
0.20  
0.79  
0.38  
0.21  
0.49  
0.82  
0.40  
0.15  
0.01  
0.30  
0.06  
0.44  
0.15  
0.18  
0.12  
0.40  
0.25  
0.50  
0.37  
0.99  
0.61  
0.48  
0.24  
0.80

0.02  
0.01  
0.03  
0.03  
0.14  
0.19  
0.22  
0.47  
0.05  
0.01  
0.10  
0.11  
0.44  
0.71  
0.08  
0.13  
0.04  
0.83  
0.87  
1.00  
0.42  
0.65  
0.35  
0.02  
0.02  
0.01  
0.01  
0.04  
0.02  
0.01  
0.16  
0.62  
0.04  
0.00  
0.00  
0.95  
0.70  
0.20  
0.42  
0.23  
0.59  
0.17  
0.20  
0.41  
0.20  
0.10  
0.02

0.44  
0.15  
0.09  
0.08  
0.20  
0.62  
0.86  
0.28  
0.01  
0.15  
0.25  
0.64  
0.35  
0.37  
0.48  
0.39  
0.39  
0.73  
0.14  
0.82  
0.30  
0.22  
0.47  
0.03  
0.05  
0.09  
0.74  
0.68  
0.56  
0.66  
0.60  
0.51  
0.83  
0.00  
0.19  
0.03  
0.03  
0.45  
0.02  
0.01  
0.00  
0.00  
0.09  
0.02  
0.42  
0.26  
0.12

0.08  
0.29  
0.00  
0.42  
0.11  
0.12  
0.11  
0.43  
0.01  
0.53  
0.43  
0.56  
0.88  
0.71  
0.36  
0.58  
0.64  
0.68  
0.81  
0.92  
0.68  
0.72  
0.92  
0.90  
0.22  
0.40  
0.26  
0.73  
0.70  
0.81  
0.03  
0.80  
0.62  
0.60  
0.45  
0.07  
0.31  
0.63  
0.39  
0.29  
0.39  
0.38  
0.01  
0.35  
0.02  
0.54  
0.65

0.05  
0.01  
0.01  
0.00  
0.01  
0.41  
0.57  
0.40  
0.24  
0.63  
0.87  
0.11  
0.19  
0.75  
0.12  
0.71  
0.52  
0.19  
0.23  
0.21  
0.29  
0.12  
0.02  
0.50  
0.39  
0.32  
0.03  
0.06  
0.24  
0.60  
0.60  
0.05  
0.09  
0.33  
0.12  
0.11  
0.62  
0.96  
0.06  
0.14  
0.02  
0.41  
0.46  
0.74  
0.21  
0.35  
0.94

0.06  
0.93  
0.26  
0.42  
0.41  
0.24  
0.18  
0.27  
0.74  
0.52  
0.05  
0.06  
0.17  
0.61  
0.04  
0.12  
0.06  
0.41  
0.30  
0.25  
0.08  
0.44  
0.70  
0.06  
0.21  
0.39  
0.01  
0.04  
0.28  
0.43  
0.47  
0.16  
0.48  
0.55  
0.50  
0.07  
0.43  
0.08  
0.07  
0.24  
0.13  
0.35  
0.08  
0.02  
0.95  
0.28  
0.91

0.09  
0.12  
0.89  
0.05  
0.04  
0.09  
0.06  
0.06  
0.03  
0.00  
0.09  
0.19  
0.10  
0.08  
0.01  
0.03  
0.07  
0.02  
0.03  
0.05  
0.03  
0.11  
0.38  
0.59  
0.04  
0.02  
0.00  
0.02  
0.04  
0.03  
0.24  
0.04  
0.60  
0.93  
0.01  
0.13  
0.04  
0.07  
0.05  
0.08  
0.05  
0.05  
0.48  
0.42  
0.45  
0.06  
0.06

0.26  
0.27  
0.13  
0.18  
0.25  
0.58  
0.39  
0.45  
0.00  
0.02  
0.02  
0.01  
0.00  
0.02  
0.03  
0.01  
0.01  
0.03  
0.00  
0.00  
0.02  
0.01  
0.00  
0.00  
0.01  
0.02  
0.25  
0.25  
0.23  
0.17  
0.30  
0.91  
0.83  
0.02  
0.68  
0.71  
0.58  
0.65  
0.03  
0.80  
0.15  
0.23  
0.28  
0.34  
0.16  
0.27  
0.20



0.08  
0.46  
0.47  
0.57  
0.01  
0.41  
0.57  
0.07  
0.27  
0.11  
0.13  
0.65  
0.37  
0.01  
0.08  
0.02  
0.04  
0.01  
0.77  
0.13  
0.97  
0.10  
0.01  
0.12  
0.13  
0.61  
0.18  
0.22  
0.28  
0.78  
0.62  
0.62  
0.62  
0.54  
0.03  
0.02  
0.46  
0.29  
0.12  
0.14  
0.85  
0.34  
0.11  
0.14  
0.02  
0.01  
0.12

0.03  
0.74  
0.13  
0.28  
0.25  
0.28  
0.07  
0.28  
0.01  
0.80  
0.27  
0.35  
0.45  
0.95  
0.23  
0.06  
0.02  
0.65  
0.90  
0.04  
0.03  
0.12  
0.11  
0.20  
0.03  
0.00  
0.00  
0.01  
0.01  
0.06  
0.95  
0.72  
0.17  
0.02  
0.01  
0.07  
0.15  
0.00  
0.08  
0.01  
0.10  
0.73  
0.03  
0.15  
0.75  
0.08  
0.33

0.67  
0.31  
0.35  
0.79  
0.54  
0.56  
0.84  
0.10  
0.09  
0.08  
0.06  
0.15  
0.58  
0.04  
0.00  
0.28  
0.12  
0.03  
0.57  
0.70  
0.03  
0.76  
0.54  
0.00  
0.07  
0.05  
0.03  
0.54  
0.30  
0.12  
0.66  
0.01  
0.16  
0.15  
0.53  
0.22  
0.19  
0.19  
0.18  
0.22  
0.15  
0.13  
0.09  
0.60  
0.61  
0.36  
0.19

0.03  
0.20  
0.14  
0.23  
0.53  
0.00  
0.02  
0.42  
0.31  
0.07  
0.09  
0.11  
0.07  
0.05  
0.12  
0.08  
0.06  
0.07  
0.09  
0.05  
0.25  
0.13  
0.19  
0.05  
0.23  
0.12  
0.02  
0.19  
0.65  
0.02  
0.28  
0.35  
0.14  
0.44  
0.51  
0.40  
0.26  
0.24  
0.01  
0.00  
0.06  
0.60  
0.69  
0.10  
0.02  
0.06  
0.64

0.27  
0.13  
0.53  
0.28  
0.30  
0.04  
0.20  
0.37  
0.25  
0.19  
0.11  
0.04  
0.08  
0.04  
0.20  
0.60  
0.07  
0.00  
0.00  
0.41  
0.54  
0.40  
0.04  
0.52  
0.37  
0.89  
0.03  
0.01  
0.01  
0.02  
0.52  
0.08  
0.15  
0.12  
0.06  
0.07  
0.16  
0.26  
0.13  
0.34  
0.17  
0.18  
0.01  
0.38  
0.52  
0.63  
0.75

0.13  
0.66  
0.77  
0.17  
0.44  
0.04  
0.06  
0.14  
0.15  
0.95  
0.77  
1.00  
0.19  
0.14  
0.94  
0.64  
0.33  
0.40  
0.12  
0.88  
0.03  
0.15  
0.60  
0.43  
0.63  
0.26  
0.22  
0.96  
0.57  
0.26  
0.19  
0.74  
0.89  
1.00  
0.72  
0.72  
0.04  
0.05  
0.36  
0.21  
0.51  
0.00  
0.54  
0.89  
0.09  
0.65  
0.24

0.24  
0.08  
0.85  
0.75  
0.02  
0.20  
0.33  
0.07  
0.04  
0.76  
0.87  
0.17  
0.78  
0.02  
0.36  
0.04  
0.04  
0.10  
0.58  
0.00  
0.89  
0.01  
0.27  
0.66  
0.49  
0.45  
0.18  
0.08  
0.25  
0.00  
0.06  
0.11  
0.23  
0.42  
0.13  
0.29  
0.01  
0.03  
0.93  
0.84  
0.60  
0.66  
0.70  
0.96  
0.91  
0.98  
0.95

0.83  
0.20  
0.77  
0.51  
0.24  
0.24  
0.22  
0.20  
0.14  
0.30  
0.71  
0.24  
0.35  
0.61  
0.45  
0.50  
0.51  
0.08  
0.00  
0.04  
0.80  
0.69  
0.77  
0.10  
0.30  
0.19  
0.33  
0.98  
0.70  
0.37  
0.50  
0.05  
0.32  
0.18  
0.21  
0.13  
0.13  
0.35  
0.52  
0.42  
0.69  
0.59  
0.60  
0.16  
0.76  
0.65  
0.06



0.06  
0.06  
0.06  
0.02  
0.15  
0.02  
0.34  
0.58  
0.38  
0.19  
0.67  
0.11  
0.17  
0.12  
0.08  
0.13  
0.11  
0.10  
0.09  
0.12  
0.10  
0.01  
0.57  
0.62  
0.60  
0.63  
0.10  
0.25  
0.15  
0.41  
0.00  
0.00  
0.16  
0.38  
0.41  
0.37  
0.09  
0.38  
0.00  
0.53  
0.50  
0.51  
0.55  
0.26  
0.09  
0.58  
0.16

0.25  
0.03  
0.30  
0.08  
0.13  
0.64  
0.50  
0.22  
0.37  
0.09  
0.00  
0.23  
0.14  
0.11  
0.07  
0.11  
0.63  
0.13  
0.11  
0.09  
0.08  
0.38  
0.32  
0.34  
0.44  
0.64  
0.78  
0.72  
0.02  
0.06  
0.82  
0.56  
0.60  
0.58  
0.21  
0.13  
0.24  
0.19  
0.10  
0.17  
0.04  
0.61  
0.81  
0.39  
0.41  
0.34  
0.07

0.24  
0.08  
0.22  
0.17  
0.08  
0.13  
0.46  
0.34  
0.62  
0.39  
0.82  
0.15  
0.05  
0.03  
0.08  
0.34  
0.83  
0.29  
0.47  
0.56  
0.57  
0.58  
0.57  
0.51  
0.52  
0.22  
0.50  
0.98  
0.36  
0.36  
0.25  
0.00  
0.33  
0.56  
0.18  
0.46  
0.54  
0.04  
0.40  
0.85  
1.00  
0.78  
0.71  
0.66  
0.91  
0.55  
0.87

0.89  
0.57  
0.13  
0.31  
0.58  
0.45  
0.23  
0.03  
0.34  
0.38  
0.01  
0.02  
0.23  
0.98  
0.00  
0.76  
0.78  
0.10  
0.11  
0.00  
0.56  
0.01  
0.63  
0.63  
0.02  
0.74  
0.30  
0.48  
0.60  
0.00  
0.01  
0.01  
0.10  
0.19  
0.23  
0.78  
0.96  
0.12  
0.16  
0.26  
0.14  
0.02  
0.00  
0.00  
0.02  
0.44  
0.00

0.04  
0.03  
0.01  
0.02  
0.01  
0.18  
0.21  
0.29  
0.02  
0.82  
0.49  
0.29  
0.06  
0.09  
0.18  
0.23  
0.10  
0.16  
0.00  
0.01  
0.01  
0.03  
0.06  
0.21  
0.02  
0.12  
0.00  
0.56  
0.62  
0.40  
0.44  
0.29  
0.32  
0.02  
0.07  
0.31  
0.66  
0.34  
0.12  
0.11  
0.46  
0.57  
0.02  
0.05  
0.03  
0.06  
0.03

0.20  
0.32  
0.05  
0.21  
0.03  
0.01  
0.55  
0.64  
0.20  
0.04  
0.17  
0.10  
0.31  
0.09  
0.11  
0.17  
0.07  
0.08  
0.64  
0.70  
0.27  
0.02  
0.07  
0.06  
0.17  
0.46  
0.79  
0.05  
0.09  
0.95  
0.12  
0.92  
0.12  
0.25  
0.22  
0.03  
0.04  
0.01  
0.00  
0.01  
0.09  
0.08  
0.09  
0.25
